# Supplementary material
Source: publisher figshare collection journal article supplement (https://gsajournals.figshare.com/ndownloader/files/15013817)
Supplement: Supplementary file 1 [file 15013817]

## Sheet: Chi Square p-values
	[Remark 1]: This Excel File contains Data Derived from: Linheiro, RS and Bergman, C (2008) Nucleic Acid Research, Vol. 36, No. 19, 6199-6208
	[Remark 2]: All Position Frequency Matrices (PFM) can be found in the Worksheet 2 " All Position Frequency Tables"
	[Remark 3]: All Data Resulting in the Individual PFMs can be Found in the following Worksheets and the Reference Named Above
	[Remark 4]: All Data on InSite P-elements are from Reference: Gohl, et al. (2011) Nature Methods, Vol 8, No. 3, 231-237
	[Remark 5]: All Data on StanEx P-elements are from Reference: Kockel et al. (2016) G3 Vol. 6, No. 10, 3017-3026
	14 bp Motiv
	Chi Square Test Derived p-value StanEx PFM vs PFM of other P-Elements
		EPgy2	GT	SUPorP	XP	GawB (+)
	StanEx	0.432883	0.0692528	0.358979	0.494584	0.195919
	14 bp Motiv
	Chi Square Test Derived p-value StanEx PFM vs Summarized PFM Derived from all P-Elements in this Spreadsheet
		P [SUM]
	StanEx	0.467898

## Sheet: All Position Frequency Tables
	EPgy2 Data																		GT Data																		SUPorP Data
		Position Count Matrix EPgy2-																		Position Count Matrix GT-																		Position Count Matrix SUPorP-
			1	2	3	4	5	6	7	8	9	10	11	12	13	14					1	2	3	4	5	6	7	8	9	10	11	12	13	14					1	2	3	4	5	6	7	8	9	10	11
	Sum	A	716	357	443	308	218	176	186	505	480	568	149	320	579	524			Sum	A	96	54	62	32	33	32	29	81	64	83	26	45	85	72			Sum	A	450	227	283	196	150	112	116	311	279	368	91
		C	143	310	315	369	344	720	573	259	189	390	735	423	261	166				C	27	37	41	58	52	94	80	42	25	45	100	68	40	21				C	89	206	243	241	235	454	392	153	135	272	476
		G	172	287	452	746	389	195	266	626	696	361	352	355	286	143				G	27	34	87	110	64	34	38	75	95	59	58	44	32	19				G	106	165	279	491	237	120	162	422	491	231	265
		T	518	595	339	126	598	458	524	159	184	230	313	451	423	716				T	70	95	30	20	71	60	73	22	36	33	36	63	63	108				T	364	411	204	81	387	323	339	123	104	138	177
	Checksum		1549	1549	1549	1549	1549	1549	1549	1549	1549	1549	1549	1549	1549	1549			Checksum		220	220	220	220	220	220	220	220	220	220	220	220	220	220			Checksum		1009	1009	1009	1009	1009	1009	1009	1009	1009	1009	1009
		Position Frequency Matrix EPgy2-																		Position Frequency Matrix GT-																		Position Frequency Matrix SUPorP-
			1	2	3	4	5	6	7	8	9	10	11	12	13	14					1	2	3	4	5	6	7	8	9	10	11	12	13	14					1	2	3	4	5	6	7	8	9	10	11
	Sum	A	46.2234	23.0471	28.5991	19.8838	14.0736	11.3622	12.0077	32.6017	30.9877	36.6688	9.61911	20.6585	37.379	33.8283			Sum	A	43.6364	24.5455	28.1818	14.5455	15	14.5455	13.1818	36.8182	29.0909	37.7273	11.8182	20.4545	38.6364	32.7273			Sum	A	44.5986	22.4975	28.0476	19.4252	14.8662	11.1001	11.4965	30.8226	27.6511	36.4718	9.01883
		C	9.23176	20.0129	20.3357	23.8218	22.2079	46.4816	36.9916	16.7205	12.2014	25.1775	47.45	27.3079	16.8496	10.7166				C	12.2727	16.8182	18.6364	26.3636	23.6364	42.7273	36.3636	19.0909	11.3636	20.4545	45.4545	30.9091	18.1818	9.54545				C	8.82061	20.4163	24.0833	23.885	23.2904	44.995	38.8503	15.1635	13.3796	26.9574	47.1754
		G	11.1039	18.5281	29.1801	48.1601	25.113	12.5888	17.1724	40.4132	44.9322	23.3054	22.7243	22.918	18.4635	9.23176				G	12.2727	15.4545	39.5455	50	29.0909	15.4545	17.2727	34.0909	43.1818	26.8182	26.3636	20	14.5455	8.63636				G	10.5055	16.3528	27.6511	48.662	23.4886	11.893	16.0555	41.8236	48.662	22.894	26.2636
		T	33.4409	38.4119	21.8851	8.13428	38.6056	29.5675	33.8283	10.2647	11.8786	14.8483	20.2066	29.1156	27.3079	46.2234				T	31.8182	43.1818	13.6364	9.09091	32.2727	27.2727	33.1818	10	16.3636	15	16.3636	28.6364	28.6364	49.0909				T	36.0753	40.7334	20.218	8.02775	38.3548	32.0119	33.5976	12.1903	10.3072	13.6769	17.5421
	Checksum		100	100	100	100	100	100	100	100	100	100	100	100	100	100			Checksum		100	100	100	100	100	100	100	100	100	100	100	100	100	100			Checksum		100	100	100	100	100	100	100	100	100	100	100
		Position Count Matrix EPgy2+																		Position Count Matrix GT+																		Position Count Matrix SUPorP+
			1	2	3	4	5	6	7	8	9	10	11	12	13	14					1	2	3	4	5	6	7	8	9	10	11	12	13	14					1	2	3	4	5	6	7	8	9	10	11
	Sum	A	713	376	473	283	212	190	183	525	479	610	136	328	585	506			Sum	A	115	66	66	47	45	27	32	97	80	89	28	51	89	73			Sum	A	447	253	296	202	130	121	105	340	294	412	92
		C	157	288	323	364	330	722	618	268	204	385	761	464	267	175				C	25	45	65	57	59	100	96	41	28	57	115	58	55	27				C	97	184	233	241	228	433	375	169	125	243	454
		G	196	286	464	784	409	206	253	588	691	344	380	345	311	159				G	25	43	62	118	41	35	38	77	115	58	52	70	44	27				G	105	162	288	470	276	132	173	371	459	200	235
		T	497	613	303	132	612	445	509	182	189	224	286	426	400	723				T	80	91	52	23	100	83	79	30	22	41	50	66	57	118				T	351	401	183	87	366	314	347	120	122	145	219
	Checksum		1563	1563	1563	1563	1563	1563	1563	1563	1563	1563	1563	1563	1563	1563			Checksum		245	245	245	245	245	245	245	245	245	245	245	245	245	245			Checksum		1000	1000	1000	1000	1000	1000	1000	1000	1000	1000	1000
		Position Frequency Matrix EPgy2+																		Position Frequency Matrix GT+																		Position Frequency Matrix SUPorP+
			1	2	3	4	5	6	7	8	9	10	11	12	13	14					1	2	3	4	5	6	7	8	9	10	11	12	13	14					1	2	3	4	5	6	7	8	9	10	11
	Sum	A	45.6174	24.0563	30.2623	18.1062	13.5637	12.1561	11.7083	33.5893	30.6462	39.0275	8.70122	20.9853	37.428	32.3736			Sum	A	46.9388	26.9388	26.9388	19.1837	18.3673	11.0204	13.0612	39.5918	32.6531	36.3265	11.4286	20.8163	36.3265	29.7959			Sum	A	44.7	25.3	29.6	20.2	13	12.1	10.5	34	29.4	41.2	9.2
		C	10.0448	18.4261	20.6654	23.2885	21.1132	46.1932	39.5393	17.1465	13.0518	24.6321	48.6884	29.6865	17.0825	11.1964				C	10.2041	18.3673	26.5306	23.2653	24.0816	40.8163	39.1837	16.7347	11.4286	23.2653	46.9388	23.6735	22.449	11.0204				C	9.7	18.4	23.3	24.1	22.8	43.3	37.5	16.9	12.5	24.3	45.4
		G	12.54	18.2981	29.6865	50.1599	26.1676	13.1798	16.1868	37.62	44.2099	22.009	24.3122	22.0729	19.8976	10.1727				G	10.2041	17.551	25.3061	48.1633	16.7347	14.2857	15.5102	31.4286	46.9388	23.6735	21.2245	28.5714	17.9592	11.0204				G	10.5	16.2	28.8	47	27.6	13.2	17.3	37.1	45.9	20	23.5
		T	31.7978	39.2194	19.3858	8.4453	39.1555	28.4709	32.5656	11.6443	12.0921	14.3314	18.2981	27.2553	25.5918	46.2572				T	32.6531	37.1429	21.2245	9.38776	40.8163	33.8776	32.2449	12.2449	8.97959	16.7347	20.4082	26.9388	23.2653	48.1633				T	35.1	40.1	18.3	8.7	36.6	31.4	34.7	12	12.2	14.5	21.9
	Checksum		100	100	100	100	100	100	100	100	100	100	100	100	100	100			Checksum		100	100	100	100	100	100	100	100	100	100	100	100	100	100			Checksum		100	100	100	100	100	100	100	100	100	100	100
		Position Count Matrix ALL EPgy2																		Position Count Matrix ALL GT																		Position Count Matrix ALL SUPorP
			1	2	3	4	5	6	7	8	9	10	11	12	13	14					1	2	3	4	5	6	7	8	9	10	11	12	13	14					1	2	3	4	5	6	7	8	9	10	11
	Sum	A	1429	733	916	591	430	366	369	1030	959	1178	285	648	1164	1030			Sum	A	211	120	128	79	78	59	61	178	144	172	54	96	174	145			Sum	A	897	480	579	398	280	233	221	651	573	780	183
		C	300	598	638	733	674	1442	1191	527	393	775	1496	887	528	341				C	52	82	106	115	111	194	176	83	53	102	215	126	95	48				C	186	390	476	482	463	887	767	322	260	515	930
		G	368	573	916	1530	798	401	519	1214	1387	705	732	700	597	302				G	52	77	149	228	105	69	76	152	210	117	110	114	76	46				G	211	327	567	961	513	252	335	793	950	431	500
		T	1015	1208	642	258	1210	903	1033	341	373	454	599	877	823	1439				T	150	186	82	43	171	143	152	52	58	74	86	129	120	226				T	715	812	387	168	753	637	686	243	226	283	396
	Checksum		3112	3112	3112	3112	3112	3112	3112	3112	3112	3112	3112	3112	3112	3112			Checksum		465	465	465	465	465	465	465	465	465	465	465	465	465	465			Checksum		2009	2009	2009	2009	2009	2009	2009	2009	2009	2009	2009
		Position Frequency Matrix ALL EPgy2																		Position Frequency Matrix ALL GT																		Position Frequency Matrix ALL SUPorP
			1	2	3	4	5	6	7	8	9	10	11	12	13	14					1	2	3	4	5	6	7	8	9	10	11	12	13	14					1	2	3	4	5	6	7	8	9	10	11
	Sum	A	45.919	23.554	29.4344	18.991	13.8175	11.7609	11.8573	33.0977	30.8162	37.8535	9.1581	20.8226	37.4036	33.0977			Sum	A	45.3763	25.8065	27.5269	16.9892	16.7742	12.6882	13.1183	38.2796	30.9677	36.9892	11.6129	20.6452	37.4194	31.1828			Sum	A	44.6491	23.8925	28.8203	19.8109	13.9373	11.5978	11.0005	32.4042	28.5217	38.8253	9.10901
		C	9.6401	19.2159	20.5013	23.554	21.6581	46.3368	38.2712	16.9344	12.6285	24.9036	48.072	28.5026	16.9666	10.9576				C	11.1828	17.6344	22.7957	24.7312	23.871	41.7204	37.8495	17.8495	11.3978	21.9355	46.2366	27.0968	20.4301	10.3226				C	9.25834	19.4126	23.6934	23.992	23.0463	44.1513	38.1782	16.0279	12.9418	25.6346	46.2917
		G	11.8252	18.4126	29.4344	49.1645	25.6427	12.8856	16.6774	39.0103	44.5694	22.6542	23.5219	22.4936	19.1838	9.70437				G	11.1828	16.5591	32.043	49.0323	22.5806	14.8387	16.3441	32.6882	45.1613	25.1613	23.6559	24.5161	16.3441	9.89247				G	10.5027	16.2768	28.223	47.8347	25.5351	12.5436	16.675	39.4724	47.2872	21.4535	24.888
		T	32.6157	38.8175	20.6298	8.29049	38.8817	29.0167	33.1941	10.9576	11.9859	14.5887	19.2481	28.1812	26.446	46.2404				T	32.2581	40	17.6344	9.24731	36.7742	30.7527	32.6882	11.1828	12.4731	15.914	18.4946	27.7419	25.8065	48.6022				T	35.5898	40.4181	19.2633	8.36237	37.4813	31.7073	34.1463	12.0956	11.2494	14.0866	19.7113
	Checksum		100	100	100	100	100	100	100	100	100	100	100	100	100	100			Checksum		100	100	100	100	100	100	100	100	100	100	100	100	100	100			Checksum		100	100	100	100	100	100	100	100	100	100	100
	The Matrices Below Contain the Sum of all P-elements here: EPgy2, GT, SUPor-P, XP, GawB, InSite (NOT StanEx)
		Position Count Matrix ALL P-elements
			1	2	3	4	5	6	7	8	9	10	11	12	13	14
	Sum	A	4927	2638	3199	1996	1464	1312	1246	3588	3208	4133	963	2204	4111	3545
		C	1055	2159	2376	2611	2352	4888	4151	1845	1394	2734	5178	3034	1922	1211
		G	1233	1909	3088	5254	2814	1416	1792	4176	4919	2434	2615	2442	2061	1031
		T	3581	4090	2133	935	4166	3180	3607	1187	1275	1495	2040	3116	2702	5009
	Checksum		10796	10796	10796	10796	10796	10796	10796	10796	10796	10796	10796	10796	10796	10796
		Position Frequency Matrix ALL P-elements
			1	2	3	4	5	6	7	8	9	10	11	12	13	14
	Sum	A	45.6373	24.435	29.6313	18.4883	13.5606	12.1526	11.5413	33.2345	29.7147	38.2827	8.91997	20.415	38.0789	32.8362
		C	9.77214	19.9981	22.0082	24.1849	21.7858	45.276	38.4494	17.0897	12.9122	25.3242	47.9622	28.103	17.8029	11.2171
		G	11.4209	17.6825	28.6032	48.6662	26.0652	13.116	16.5987	38.681	45.5632	22.5454	24.2219	22.6195	19.0904	9.54983
		T	33.1697	37.8844	19.7573	8.66062	38.5884	29.4554	33.4105	10.9948	11.8099	13.8477	18.8959	28.8625	25.0278	46.3968
	Checksum		100	100	100	100	100	100	100	100	100	100	100	100	100	100
[truncated: 67 more columns]

## Sheet: EPgy2 -
Chromosome	P direction	InsertionSite	PelementFlybaseId	PelementTypes	8 bp repeat	14 bp ins. site		1	2	3	4	5	6	7	8	9	10	11	12	13	14
2L	-	2L-93617	FBti0039572	EPgy2	CTTTAGAC	AAGCTTTAGACGAA		A	A	G	C	T	T	T	A	G	A	C	G	A	A
2L	-	2L-114667	FBti0027384	EPgy2	CAGATCCC	ACACAGATCCCGAC		A	C	A	C	A	G	A	T	C	C	C	G	A	C
2L	-	2L-128722	FBti0027383	EPgy2	TTGTTTAT	ATTTTGTTTATTTA		A	T	T	T	T	G	T	T	T	A	T	T	T	A
2L	-	2L-249365	FBti0057985	EPgy2	AATTACAC	ATGAATTACACCTA		A	T	G	A	A	T	T	A	C	A	C	C	T	A
2L	-	2L-267524	FBti0039529	EPgy2	CTGTGTGC	TCGCTGTGTGCCTT		T	C	G	C	T	G	T	G	T	G	C	C	T	T
2L	-	2L-288986	FBti0039404	EPgy2	GGTTCGGC	TTGGGTTCGGCGAT		T	T	G	G	G	T	T	C	G	G	C	G	A	T
2L	-	2L-292270	FBti0057807	EPgy2	ATCAGAGT	ACAATCAGAGTTAT		A	C	A	A	T	C	A	G	A	G	T	T	A	T
2L	-	2L-298142	FBti0039328	EPgy2	ATTCAGTG	CAAATTCAGTGATA		C	A	A	A	T	T	C	A	G	T	G	A	T	A
2L	-	2L-357880	FBti0076035	EPgy2	CTGCGGCC	ATACTGCGGCCAAT		A	T	A	C	T	G	C	G	G	C	C	A	A	T
2L	-	2L-414844	FBti0039723	EPgy2	GTCTACCG	TTCGTCTACCGCCG		T	T	C	G	T	C	T	A	C	C	G	C	C	G
2L	-	2L-447338	FBti0039890	EPgy2	ATCTCGAG	TAGATCTCGAGGAT		T	A	G	A	T	C	T	C	G	A	G	G	A	T
2L	-	2L-452934	FBti0057915	EPgy2	GGCGAACG	TTAGGCGAACGTAA		T	T	A	G	G	C	G	A	A	C	G	T	A	A
2L	-	2L-560325	FBti0027043	EPgy2	CCTAGGTG	GTGCCTAGGTGTGT		G	T	G	C	C	T	A	G	G	T	G	T	G	T
2L	-	2L-628840	FBti0038698	EPgy2	GTTAGGGA	GGCGTTAGGGATTT		G	G	C	G	T	T	A	G	G	G	A	T	T	T
2L	-	2L-701971	FBti0040125	EPgy2	ATTGCAGC	CTGATTGCAGCATA		C	T	G	A	T	T	G	C	A	G	C	A	T	A
2L	-	2L-974168	FBti0040169	EPgy2	GTCAATAT	GTTGTCAATATGCT		G	T	T	G	T	C	A	A	T	A	T	G	C	T
2L	-	2L-1102564	FBti0039423	EPgy2	AGCCGAAG	AAGAGCCGAAGGAC		A	A	G	A	G	C	C	G	A	A	G	G	A	C
2L	-	2L-1118904	FBti0040066	EPgy2	GCGCAGGG	TAAGCGCAGGGGTA		T	A	A	G	C	G	C	A	G	G	G	G	T	A
2L	-	2L-1129567	FBti0040243	EPgy2	GGTTGCTG	TCTGGTTGCTGTTG		T	C	T	G	G	T	T	G	C	T	G	T	T	G
2L	-	2L-1143176	FBti0024101	EPgy2	CCCCAGTA	ACACCCCAGTACCG		A	C	A	C	C	C	C	A	G	T	A	C	C	G
2L	-	2L-1158455	FBti0057670	EPgy2	GTTCAGAG	ACAGTTCAGAGTCA		A	C	A	G	T	T	C	A	G	A	G	T	C	A
2L	-	2L-1169800	FBti0040144	EPgy2	GTTCGCAC	AACGTTCGCACAGT		A	A	C	G	T	T	C	G	C	A	C	A	G	T
2L	-	2L-1172831	FBti0057766	EPgy2	GCTGCGAG	AAAGCTGCGAGTTT		A	A	A	G	C	T	G	C	G	A	G	T	T	T
2L	-	2L-1502833	FBti0057891	EPgy2	CCCCAGCT	TTGCCCCAGCTCTA		T	T	G	C	C	C	C	A	G	C	T	C	T	A
2L	-	2L-1524857	FBti0057640	EPgy2	GTCCAGTC	AAAGTCCAGTCCTC		A	A	A	G	T	C	C	A	G	T	C	C	T	C
2L	-	2L-1574432	FBti0038845	EPgy2	GGCAGCTG	AAAGGCAGCTGGTT		A	A	A	G	G	C	A	G	C	T	G	G	T	T
2L	-	2L-1710424	FBti0038875	EPgy2	GTTCAGTT	TCAGTTCAGTTCGT		T	C	A	G	T	T	C	A	G	T	T	C	G	T
2L	-	2L-1724351	FBti0039598	EPgy2	GTTGCACC	AGCGTTGCACCTGT		A	G	C	G	T	T	G	C	A	C	C	T	G	T
2L	-	2L-1728506	FBti0076119	EPgy2	CCCCTGGC	TTACCCCTGGCCAT		T	T	A	C	C	C	C	T	G	G	C	C	A	T
2L	-	2L-1910077	FBti0075862	EPgy2	CCTCAGCG	ATACCTCAGCGGTT		A	T	A	C	C	T	C	A	G	C	G	G	T	T
2L	-	2L-1982698	FBti0075907	EPgy2	GATGAGTT	TTGGATGAGTTAAA		T	T	G	G	A	T	G	A	G	T	T	A	A	A
2L	-	2L-2130872	FBti0075458	EPgy2	CTCCACAG	TGGCTCCACAGTGG		T	G	G	C	T	C	C	A	C	A	G	T	G	G
2L	-	2L-2364729	FBti0040122	EPgy2	GTCTATGT	CTTGTCTATGTGTG		C	T	T	G	T	C	T	A	T	G	T	G	T	G
2L	-	2L-2755483	FBti0076124	EPgy2	CATATGTA	GTACATATGTATGT		G	T	A	C	A	T	A	T	G	T	A	T	G	T
2L	-	2L-2874346	FBti0057782	EPgy2	GGCCGTAT	TTAGGCCGTATTTG		T	T	A	G	G	C	C	G	T	A	T	T	T	G
2L	-	2L-2875031	FBti0057994	EPgy2	CTCTGGCG	ACACTCTGGCGATC		A	C	A	C	T	C	T	G	G	C	G	A	T	C
2L	-	2L-2886852	FBti0057840	EPgy2	GCTTGGCC	CTCGCTTGGCCGCT		C	T	C	G	C	T	T	G	G	C	C	G	C	T
2L	-	2L-2954500	FBti0039426	EPgy2	CCCTGAAC	ATACCCTGAACGAA		A	T	A	C	C	C	T	G	A	A	C	G	A	A
2L	-	2L-2976877	FBti0057755	EPgy2	GGTACGCC	ATTGGTACGCCCAT		A	T	T	G	G	T	A	C	G	C	C	C	A	T
2L	-	2L-2979237	FBti0039435	EPgy2	AATGGAGC	ACCAATGGAGCAGG		A	C	C	A	A	T	G	G	A	G	C	A	G	G
2L	-	2L-3023112	FBti0024088	EPgy2	ATCCTGTT	ACGATCCTGTTCCT		A	C	G	A	T	C	C	T	G	T	T	C	C	T
2L	-	2L-3144783	FBti0033104	EPgy2	GTGCAGAC	CCGGTGCAGACGAT		C	C	G	G	T	G	C	A	G	A	C	G	A	T
2L	-	2L-3145695	FBti0033304	EPgy2	ACATGAGT	CTCACATGAGTTCT		C	T	C	A	C	A	T	G	A	G	T	T	C	T
2L	-	2L-3303128	FBti0040242	EPgy2	GGGCGTAG	AAAGGGCGTAGTAC		A	A	A	G	G	G	C	G	T	A	G	T	A	C
2L	-	2L-3417582	FBti0039253	EPgy2	ATCTGAAG	TACATCTGAAGCCT		T	A	C	A	T	C	T	G	A	A	G	C	C	T
2L	-	2L-3507364	FBti0025298	EPgy2	GTTGAGCG	TTAGTTGAGCGTTT		T	T	A	G	T	T	G	A	G	C	G	T	T	T
2L	-	2L-3646174	FBti0057612	EPgy2	AGAGCTGG	TCGAGAGCTGGTTT		T	C	G	A	G	A	G	C	T	G	G	T	T	T
2L	-	2L-4393821	FBti0033385	EPgy2	ACTCAACC	TCAACTCAACCTAA		T	C	A	A	C	T	C	A	A	C	C	T	A	A
2L	-	2L-4394250	FBti0039521	EPgy2	GACTGCAT	TCCGACTGCATGTT		T	C	C	G	A	C	T	G	C	A	T	G	T	T
2L	-	2L-4449035	FBti0038895	EPgy2	AGCGAGAC	AAGAGCGAGACGAA		A	A	G	A	G	C	G	A	G	A	C	G	A	A
2L	-	2L-4452986	FBti0040024	EPgy2	GCTCTGAA	TTGGCTCTGAACTT		T	T	G	G	C	T	C	T	G	A	A	C	T	T
2L	-	2L-4794044	FBti0075913	EPgy2	GACTATAC	AATGACTATACATG		A	A	T	G	A	C	T	A	T	A	C	A	T	G
2L	-	2L-4850379	FBti0039629	EPgy2	CATCAGCC	CTGCATCAGCCCGT		C	T	G	C	A	T	C	A	G	C	C	C	G	T
2L	-	2L-4968901	FBti0039233	EPgy2	CTAGATAC	ATACTAGATACTCT		A	T	A	C	T	A	G	A	T	A	C	T	C	T
2L	-	2L-4979316	FBti0039235	EPgy2	ATCCAAGC	GGTATCCAAGCAAT		G	G	T	A	T	C	C	A	A	G	C	A	A	T
2L	-	2L-5009718	FBti0039728	EPgy2	ATCCACTC	ATAATCCACTCCGT		A	T	A	A	T	C	C	A	C	T	C	C	G	T
2L	-	2L-5181677	FBti0075930	EPgy2	GTCTGTAG	ATAGTCTGTAGCAC		A	T	A	G	T	C	T	G	T	A	G	C	A	C
2L	-	2L-5800196	FBti0039818	EPgy2	CCACGGAG	AGACCACGGAGATT		A	G	A	C	C	A	C	G	G	A	G	A	T	T
2L	-	2L-5801930	FBti0040003	EPgy2	GTCGGTTG	GTCGTCGGTTGCTT		G	T	C	G	T	C	G	G	T	T	G	C	T	T
2L	-	2L-5980148	FBti0039929	EPgy2	ACACAGAG	GTCACACAGAGTGA		G	T	C	A	C	A	C	A	G	A	G	T	G	A
2L	-	2L-6045989	FBti0025304	EPgy2	GGTGCAGC	ATGGGTGCAGCTTT		A	T	G	G	G	T	G	C	A	G	C	T	T	T
2L	-	2L-6047900	FBti0039982	EPgy2	GGCCAGCG	TGTGGCCAGCGGTG		T	G	T	G	G	C	C	A	G	C	G	G	T	G
2L	-	2L-6077186	FBti0033135	EPgy2	CTCCAGCC	ATGCTCCAGCCCAT		A	T	G	C	T	C	C	A	G	C	C	C	A	T
2L	-	2L-6078464	FBti0057869	EPgy2	ACCTCCGC	AGCACCTCCGCCTT		A	G	C	A	C	C	T	C	C	G	C	C	T	T
2L	-	2L-6100317	FBti0024089	EPgy2	GTACAGCC	TTTGTACAGCCTTT		T	T	T	G	T	A	C	A	G	C	C	T	T	T
2L	-	2L-6127621	FBti0039002	EPgy2	GTCTCGAC	CTCGTCTCGACTCT		C	T	C	G	T	C	T	C	G	A	C	T	C	T
2L	-	2L-6412230	FBti0076014	EPgy2	GTGCGGAC	TGTGTGCGGACTAT		T	G	T	G	T	G	C	G	G	A	C	T	A	T
2L	-	2L-6446973	FBti0027135	EPgy2	GATTAGCC	TATGATTAGCCGCT		T	A	T	G	A	T	T	A	G	C	C	G	C	T
2L	-	2L-6488753	FBti0025145	EPgy2	GACTCGCC	TCAGACTCGCCCAT		T	C	A	G	A	C	T	C	G	C	C	C	A	T
2L	-	2L-6489186	FBti0027273	EPgy2	GGCAAAAC	GATGGCAAAACTAT		G	A	T	G	G	C	A	A	A	A	C	T	A	T
2L	-	2L-6494520	FBti0075989	EPgy2	AACCGACC	AATAACCGACCAAA		A	A	T	A	A	C	C	G	A	C	C	A	A	A
2L	-	2L-6536226	FBti0057838	EPgy2	GGGCAGAT	TAGGGGCAGATACA		T	A	G	G	G	G	C	A	G	A	T	A	C	A
2L	-	2L-6562246	FBti0076050	EPgy2	GGCAGGAG	TCGGGCAGGAGACG		T	C	G	G	G	C	A	G	G	A	G	A	C	G
2L	-	2L-6716147	FBti0040234	EPgy2	ATTCCGCA	TTAATTCCGCATCA		T	T	A	A	T	T	C	C	G	C	A	T	C	A
2L	-	2L-6724288	FBti0075960	EPgy2	ACACACAC	ACCACACACACACA		A	C	C	A	C	A	C	A	C	A	C	A	C	A
2L	-	2L-6793756	FBti0039181	EPgy2	GTCTGACA	AGCGTCTGACATTT		A	G	C	G	T	C	T	G	A	C	A	T	T	T
2L	-	2L-6800872	FBti0057719	EPgy2	GTTTGGCA	TTGGTTTGGCACTA		T	T	G	G	T	T	T	G	G	C	A	C	T	A
2L	-	2L-6919272	FBti0038915	EPgy2	GTGCAGGC	ACAGTGCAGGCCAT		A	C	A	G	T	G	C	A	G	G	C	C	A	T
2L	-	2L-6945306	FBti0039824	EPgy2	GTCGTGCC	TGCGTCGTGCCCTT		T	G	C	G	T	C	G	T	G	C	C	C	T	T
2L	-	2L-6950425	FBti0075877	EPgy2	GCACCAAC	TGTGCACCAACAAA		T	G	T	G	C	A	C	C	A	A	C	A	A	A
2L	-	2L-6957014	FBti0039614	EPgy2	CACCGCAC	TCACACCGCACAAC		T	C	A	C	A	C	C	G	C	A	C	A	A	C
2L	-	2L-7021978	FBti0025211	EPgy2	GTTCAGTC	ATTGTTCAGTCGAT		A	T	T	G	T	T	C	A	G	T	C	G	A	T
2L	-	2L-7050420	FBti0075922	EPgy2	ATTCGGGG	AGCATTCGGGGAAT		A	G	C	A	T	T	C	G	G	G	G	A	A	T
2L	-	2L-7204197	FBti0038782	EPgy2	GGTCCCAC	AGCGGTCCCACCAT		A	G	C	G	G	T	C	C	C	A	C	C	A	T
2L	-	2L-7220056	FBti0038934	EPgy2	GCTGGGAC	AGTGCTGGGACTTT		A	G	T	G	C	T	G	G	G	A	C	T	T	T
2L	-	2L-7277144	FBti0040065	EPgy2	GGCCAGCA	TTTGGCCAGCAGAT		T	T	T	G	G	C	C	A	G	C	A	G	A	T
2L	-	2L-7425202	FBti0027269	EPgy2	CAGCGAAC	TCGCAGCGAACTTT		T	C	G	C	A	G	C	G	A	A	C	T	T	T
2L	-	2L-7436992	FBti0025162	EPgy2	AGCTATGG	TGCAGCTATGGCAA		T	G	C	A	G	C	T	A	T	G	G	C	A	A
2L	-	2L-7713818	FBti0039241	EPgy2	ACTCATAT	ACTACTCATATGCT		A	C	T	A	C	T	C	A	T	A	T	G	C	T
2L	-	2L-7767627	FBti0058042	EPgy2	ACGCACCC	AGTACGCACCCGAT		A	G	T	A	C	G	C	A	C	C	C	G	A	T
2L	-	2L-7790472	FBti0057607	EPgy2	CTCTGGCG	GCACTCTGGCGTAT		G	C	A	C	T	C	T	G	G	C	G	T	A	T
2L	-	2L-7810308	FBti0039643	EPgy2	GGGAGAAG	AATGGGAGAAGTAT		A	A	T	G	G	G	A	G	A	A	G	T	A	T
2L	-	2L-7855197	FBti0039820	EPgy2	AACTGAAT	AGGAACTGAATGAA		A	G	G	A	A	C	T	G	A	A	T	G	A	A
2L	-	2L-7861935	FBti0038774	EPgy2	CGCGGAAC	TTACGCGGAACATT		T	T	A	C	G	C	G	G	A	A	C	A	T	T
2L	-	2L-7985259	FBti0057799	EPgy2	GTGCAGCT	AAAGTGCAGCTGAG		A	A	A	G	T	G	C	A	G	C	T	G	A	G
2L	-	2L-7994270	FBti0039281	EPgy2	CTCTGGGC	TTCCTCTGGGCTTT		T	T	C	C	T	C	T	G	G	G	C	T	T	T
2L	-	2L-8071615	FBti0039650	EPgy2	GCGCGTAC	TGTGCGCGTACGAT		T	G	T	G	C	G	C	G	T	A	C	G	A	T
2L	-	2L-8082958	FBti0033377	EPgy2	CTATGGAT	TGACTATGGATCCG		T	G	A	C	T	A	T	G	G	A	T	C	C	G
2L	-	2L-8158966	FBti0038702	EPgy2	GGTGAACA	TTTGGTGAACAGGT		T	T	T	G	G	T	G	A	A	C	A	G	G	T
2L	-	2L-8205573	FBti0033241	EPgy2	CCACACAC	TCTCCACACACCAA		T	C	T	C	C	A	C	A	C	A	C	C	A	A
2L	-	2L-8257967	FBti0057762	EPgy2	GTTTGGGC	TCAGTTTGGGCTTT		T	C	A	G	T	T	T	G	G	G	C	T	T	T
2L	-	2L-8311439	FBti0057944	EPgy2	TTCTGGAC	ATCTTCTGGACAGT		A	T	C	T	T	C	T	G	G	A	C	A	G	T
2L	-	2L-8328769	FBti0075890	EPgy2	ATCAAGTC	CCGATCAAGTCTTA		C	C	G	A	T	C	A	A	G	T	C	T	T	A
2L	-	2L-8362447	FBti0039999	EPgy2	ACTAGGAT	ATGACTAGGATTTT		A	T	G	A	C	T	A	G	G	A	T	T	T	T
2L	-	2L-8374500	FBti0039564	EPgy2	GTCAGCAC	AAGGTCAGCACTTT		A	A	G	G	T	C	A	G	C	A	C	T	T	T
2L	-	2L-8381688	FBti0024896	EPgy2	ATGTATAT	TATATGTATATATC		T	A	T	A	T	G	T	A	T	A	T	A	T	C
2L	-	2L-8382931	FBti0025220	EPgy2	GTCTGCAT	AGCGTCTGCATCCT		A	G	C	G	T	C	T	G	C	A	T	C	C	T
2L	-	2L-8421381	FBti0074637	EPgy2	GACCCGAT	AGCGACCCGATGTA		A	G	C	G	A	C	C	C	G	A	T	G	T	A
2L	-	2L-8424978	FBti0027333	EPgy2	GTTCCGTG	TTCGTTCCGTGTGA		T	T	C	G	T	T	C	C	G	T	G	T	G	A
2L	-	2L-8433661	FBti0076056	EPgy2	GGGGCGTG	AGTGGGGCGTGTAA		A	G	T	G	G	G	G	C	G	T	G	T	A	A
2L	-	2L-8461842	FBti0057774	EPgy2	GGTGGTAC	TTTGGTGGTACAAT		T	T	T	G	G	T	G	G	T	A	C	A	A	T
2L	-	2L-8463986	FBti0039376	EPgy2	GACACGAC	AGGGACACGACCAT		A	G	G	G	A	C	A	C	G	A	C	C	A	T
2L	-	2L-8521634	FBti0033355	EPgy2	GTGATAAC	CGAGTGATAACCAT		C	G	A	G	T	G	A	T	A	A	C	C	A	T
2L	-	2L-8528459	FBti0057954	EPgy2	ATTCGCAC	TCAATTCGCACAAA		T	C	A	A	T	T	C	G	C	A	C	A	A	A
2L	-	2L-8556219	FBti0039551	EPgy2	GTTTTAAC	ATAGTTTTAACTGT		A	T	A	G	T	T	T	T	A	A	C	T	G	T
2L	-	2L-8675855	FBti0076043	EPgy2	ATTGAGAC	TTGATTGAGACCAT		T	T	G	A	T	T	G	A	G	A	C	C	A	T
2L	-	2L-8678506	FBti0039171	EPgy2	GCTGAAAC	ATCGCTGAAACGAT		A	T	C	G	C	T	G	A	A	A	C	G	A	T
2L	-	2L-8738546	FBti0039136	EPgy2	GGCTTGTG	TTGGGCTTGTGAGT		T	T	G	G	G	C	T	T	G	T	G	A	G	T
2L	-	2L-8984939	FBti0040014	EPgy2	ATCCCAAG	AGCATCCCAAGTAT		A	G	C	A	T	C	C	C	A	A	G	T	A	T
2L	-	2L-8989213	FBti0076033	EPgy2	AGACAAGC	AGCAGACAAGCGAA		A	G	C	A	G	A	C	A	A	G	C	G	A	A
2L	-	2L-9014076	FBti0039720	EPgy2	GGATGGAT	ACTGGATGGATAGA		A	C	T	G	G	A	T	G	G	A	T	A	G	A
2L	-	2L-9048126	FBti0027044	EPgy2	TTTCGATT	ATGTTTCGATTCTC		A	T	G	T	T	T	C	G	A	T	T	C	T	C
2L	-	2L-9237971	FBti0057790	EPgy2	ATCCAGGC	ATCATCCAGGCAGA		A	T	C	A	T	C	C	A	G	G	C	A	G	A
2L	-	2L-9430982	FBti0033366	EPgy2	GCTTCAGC	ATCGCTTCAGCTTT		A	T	C	G	C	T	T	C	A	G	C	T	T	T
2L	-	2L-9467667	FBti0038685	EPgy2	TGCCTAGC	TCTTGCCTAGCTAA		T	C	T	T	G	C	C	T	A	G	C	T	A	A
2L	-	2L-9576811	FBti0075436	EPgy2	TCCTAGGC	TTATCCTAGGCCAG		T	T	A	T	C	C	T	A	G	G	C	C	A	G
2L	-	2L-9699318	FBti0039753	EPgy2	AAACTTCG	CTGAAACTTCGCAA		C	T	G	A	A	A	C	T	T	C	G	C	A	A
2L	-	2L-9722878	FBti0076020	EPgy2	GGCTCGGG	TCGGGCTCGGGTTT		T	C	G	G	G	C	T	C	G	G	G	T	T	T
2L	-	2L-9790722	FBti0024073	EPgy2	CCACCACT	TCGCCACCACTGAT		T	C	G	C	C	A	C	C	A	C	T	G	A	T
2L	-	2L-9835996	FBti0057754	EPgy2	TTCCAAGC	ATCTTCCAAGCTAA		A	T	C	T	T	C	C	A	A	G	C	T	A	A
2L	-	2L-9893959	FBti0027183	EPgy2	ATCCAGTT	ATTATCCAGTTCTT		A	T	T	A	T	C	C	A	G	T	T	C	T	T
2L	-	2L-9897543	FBti0039734	EPgy2	CAACAGGG	ACGCAACAGGGTGG		A	C	G	C	A	A	C	A	G	G	G	T	G	G
2L	-	2L-9918057	FBti0076149	EPgy2	CACCCGCT	TCTCACCCGCTTAC		T	C	T	C	A	C	C	C	G	C	T	T	A	C
2L	-	2L-9918190	FBti0033224	EPgy2	TTCTGGGC	TGCTTCTGGGCCAA		T	G	C	T	T	C	T	G	G	G	C	C	A	A
2L	-	2L-9938730	FBti0057804	EPgy2	ATTTCAAC	CTGATTTCAACCGT		C	T	G	A	T	T	T	C	A	A	C	C	G	T
2L	-	2L-10201062	FBti0075925	EPgy2	GCAAAAAA	GCAGCAAAAAAAAA		G	C	A	G	C	A	A	A	A	A	A	A	A	A
2L	-	2L-10238006	FBti0076140	EPgy2	GTCTGGTC	AGGGTCTGGTCGAT		A	G	G	G	T	C	T	G	G	T	C	G	A	T
2L	-	2L-10314940	FBti0057984	EPgy2	TCCGTAAT	CTCTCCGTAATGAT		C	T	C	T	C	C	G	T	A	A	T	G	A	T
2L	-	2L-10321975	FBti0057709	EPgy2	CGCTGGAT	GCTCGCTGGATTAT		G	C	T	C	G	C	T	G	G	A	T	T	A	T
2L	-	2L-10344116	FBti0025128	EPgy2	GTTCCAAG	TCAGTTCCAAGTTT		T	C	A	G	T	T	C	C	A	A	G	T	T	T
2L	-	2L-10396239	FBti0039553	EPgy2	GTTGTGAA	ATGGTTGTGAATAG		A	T	G	G	T	T	G	T	G	A	A	T	A	G
2L	-	2L-10414019	FBti0033382	EPgy2	GGTTGGGG	ATGGGTTGGGGGAG		A	T	G	G	G	T	T	G	G	G	G	G	A	G
2L	-	2L-10506775	FBti0039711	EPgy2	CACTCGCA	AAGCACTCGCAGCA		A	A	G	C	A	C	T	C	G	C	A	G	C	A
2L	-	2L-10841438	FBti0039275	EPgy2	TGCTGGCC	TTGTGCTGGCCTTT		T	T	G	T	G	C	T	G	G	C	C	T	T	T
2L	-	2L-10943819	FBti0075968	EPgy2	GGCCAGCT	GCTGGCCAGCTCCT		G	C	T	G	G	C	C	A	G	C	T	C	C	T
2L	-	2L-11106613	FBti0038089	EPgy2	ATACCACG	ATAATACCACGGAC		A	T	A	A	T	A	C	C	A	C	G	G	A	C
2L	-	2L-11107265	FBti0039194	EPgy2	AACTGTTA	GAAAACTGTTACGA		G	A	A	A	A	C	T	G	T	T	A	C	G	A
2L	-	2L-11487035	FBti0039411	EPgy2	TTCTTGAC	TTGTTCTTGACGCT		T	T	G	T	T	C	T	T	G	A	C	G	C	T
2L	-	2L-11521290	FBti0039260	EPgy2	CTCCAAGA	AATCTCCAAGATCA		A	A	T	C	T	C	C	A	A	G	A	T	C	A
2L	-	2L-11808263	FBti0039958	EPgy2	GGCCTGAC	TGCGGCCTGACTAT		T	G	C	G	G	C	C	T	G	A	C	T	A	T
2L	-	2L-11970463	FBti0024316	EPgy2	GCTCAGAT	TTGGCTCAGATTCT		T	T	G	G	C	T	C	A	G	A	T	T	C	T
2L	-	2L-12004512	FBti0057951	EPgy2	AACTGGAC	CCCAACTGGACTGA		C	C	C	A	A	C	T	G	G	A	C	T	G	A
2L	-	2L-12026470	FBti0058034	EPgy2	CTCTCACA	GCTCTCTCACACTT		G	C	T	C	T	C	T	C	A	C	A	C	T	T
2L	-	2L-12040706	FBti0057875	EPgy2	GCGCATGT	AGAGCGCATGTGTT		A	G	A	G	C	G	C	A	T	G	T	G	T	T
2L	-	2L-12046156	FBti0057684	EPgy2	CCTGTGAG	ACACCTGTGAGAAA		A	C	A	C	C	T	G	T	G	A	G	A	A	A
2L	-	2L-12093800	FBti0075977	EPgy2	CCTCTGTT	ATACCTCTGTTGCT		A	T	A	C	C	T	C	T	G	T	T	G	C	T
2L	-	2L-12189589	FBti0057996	EPgy2	ATTCTAGG	CGGATTCTAGGTAA		C	G	G	A	T	T	C	T	A	G	G	T	A	A
2L	-	2L-12365947	FBti0100370	EPgy2	ATCCGAAT	GACATCCGAATGAT		G	A	C	A	T	C	C	G	A	A	T	G	A	T
2L	-	2L-12428053	FBti0033172	EPgy2	GGCTGGCC	ACTGGCTGGCCTTT		A	C	T	G	G	C	T	G	G	C	C	T	T	T
2L	-	2L-12433982	FBti0040072	EPgy2	GGGCAAAC	ACAGGGCAAACAAC		A	C	A	G	G	G	C	A	A	A	C	A	A	C
2L	-	2L-12461413	FBti0040173	EPgy2	AACTAACC	ACGAACTAACCGTG		A	C	G	A	A	C	T	A	A	C	C	G	T	G
2L	-	2L-13145755	FBti0040277	EPgy2	GTACAAAT	TATGTACAAATCCA		T	A	T	G	T	A	C	A	A	A	T	C	C	A
2L	-	2L-13165552	FBti0076099	EPgy2	GGAGGTGG	ATGGGAGGTGGTGT		A	T	G	G	G	A	G	G	T	G	G	T	G	T
2L	-	2L-13191315	FBti0027081	EPgy2	GGTCGCAA	AAAGGTCGCAATAT		A	A	A	G	G	T	C	G	C	A	A	T	A	T
2L	-	2L-13203784	FBti0075891	EPgy2	CTCGTGCC	GTACTCGTGCCGTT		G	T	A	C	T	C	G	T	G	C	C	G	T	T
2L	-	2L-13219904	FBti0039505	EPgy2	GCTGGGCC	ATGGCTGGGCCACC		A	T	G	G	C	T	G	G	G	C	C	A	C	C
2L	-	2L-13241948	FBti0075454	EPgy2	GTCACGTC	TACGTCACGTCAAT		T	A	C	G	T	C	A	C	G	T	C	A	A	T
2L	-	2L-13244887	FBti0040087	EPgy2	GGCTGTGG	AATGGCTGTGGTGT		A	A	T	G	G	C	T	G	T	G	G	T	G	T
2L	-	2L-13373875	FBti0033128	EPgy2	GGCGACAC	ATAGGCGACACAAA		A	T	A	G	G	C	G	A	C	A	C	A	A	A
2L	-	2L-13374662	FBti0038773	EPgy2	CTCCAGTG	AAACTCCAGTGAGT		A	A	A	C	T	C	C	A	G	T	G	A	G	T
2L	-	2L-13513075	FBti0039765	EPgy2	GTCCGAGT	TCCGTCCGAGTGCT		T	C	C	G	T	C	C	G	A	G	T	G	C	T
2L	-	2L-13516778	FBti0040177	EPgy2	GGATTGTA	ATGGGATTGTAGGT		A	T	G	G	G	A	T	T	G	T	A	G	G	T
2L	-	2L-13771090	FBti0024139	EPgy2	GTCGGAGC	AGAGTCGGAGCAAT		A	G	A	G	T	C	G	G	A	G	C	A	A	T
2L	-	2L-13878974	FBti0027067	EPgy2	CTCTGGGG	TTACTCTGGGGTGG		T	T	A	C	T	C	T	G	G	G	G	T	G	G
2L	-	2L-13923606	FBti0057759	EPgy2	ATTCGCTG	ATGATTCGCTGTAA		A	T	G	A	T	T	C	G	C	T	G	T	A	A
2L	-	2L-14285300	FBti0040260	EPgy2	CCCTGAAT	TATCCCTGAATTCT		T	A	T	C	C	C	T	G	A	A	T	T	C	T
2L	-	2L-14334108	FBti0038962	EPgy2	ATCCCTGC	AGCATCCCTGCAAT		A	G	C	A	T	C	C	C	T	G	C	A	A	T
2L	-	2L-14470193	FBti0038912	EPgy2	TGCCAGTG	AAGTGCCAGTGGAA		A	A	G	T	G	C	C	A	G	T	G	G	A	A
2L	-	2L-14490831	FBti0024884	EPgy2	GCTCAGAC	GGAGCTCAGACGAA		G	G	A	G	C	T	C	A	G	A	C	G	A	A
2L	-	2L-14581077	FBti0038956	EPgy2	TGTAAGAC	TTCTGTAAGACCGT		T	T	C	T	G	T	A	A	G	A	C	C	G	T
2L	-	2L-14797748	FBti0027152	EPgy2	TGTGAGAT	ATCTGTGAGATCAT		A	T	C	T	G	T	G	A	G	A	T	C	A	T
2L	-	2L-15068547	FBti0038775	EPgy2	GCCCAGGC	TTGGCCCAGGCATA		T	T	G	G	C	C	C	A	G	G	C	A	T	A
2L	-	2L-15264708	FBti0039764	EPgy2	CGCTGGGC	ATTCGCTGGGCGTT		A	T	T	C	G	C	T	G	G	G	C	G	T	T
2L	-	2L-15271283	FBti0057623	EPgy2	CTGCAGAT	GAGCTGCAGATCAG		G	A	G	C	T	G	C	A	G	A	T	C	A	G
2L	-	2L-15762784	FBti0039864	EPgy2	GCGCATAC	TTAGCGCATACCTT		T	T	A	G	C	G	C	A	T	A	C	C	T	T
2L	-	2L-15807621	FBti0038940	EPgy2	AGCTGAGC	TAGAGCTGAGCTAG		T	A	G	A	G	C	T	G	A	G	C	T	A	G
2L	-	2L-16251932	FBti0057682	EPgy2	ATCTAGGG	TGTATCTAGGGATT		T	G	T	A	T	C	T	A	G	G	G	A	T	T
2L	-	2L-16257592	FBti0057950	EPgy2	AAACAAAC	TACAAACAAACACT		T	A	C	A	A	A	C	A	A	A	C	A	C	T
2L	-	2L-16268221	FBti0040067	EPgy2	CTCCGAGC	TTGCTCCGAGCGAC		T	T	G	C	T	C	C	G	A	G	C	G	A	C
2L	-	2L-16351977	FBti0033326	EPgy2	AGAATCCA	CACAGAATCCAATG		C	A	C	A	G	A	A	T	C	C	A	A	T	G
2L	-	2L-16356677	FBti0040276	EPgy2	TTCCCAGC	TGATTCCCAGCGAA		T	G	A	T	T	C	C	C	A	G	C	G	A	A
2L	-	2L-16520710	FBti0039968	EPgy2	ACTTTAAC	GAGACTTTAACCCT		G	A	G	A	C	T	T	T	A	A	C	C	C	T
2L	-	2L-16544080	FBti0057749	EPgy2	GTCCGTCG	ATTGTCCGTCGTCG		A	T	T	G	T	C	C	G	T	C	G	T	C	G
2L	-	2L-16700774	FBti0025125	EPgy2	GGTCGAAC	AAGGGTCGAACTGG		A	A	G	G	G	T	C	G	A	A	C	T	G	G
2L	-	2L-16727698	FBti0027332	EPgy2	GTGCGAAT	ATCGTGCGAATTAA		A	T	C	G	T	G	C	G	A	A	T	T	A	A
2L	-	2L-16729728	FBti0039422	EPgy2	GAGTGAAC	TAAGAGTGAACCCA		T	A	A	G	A	G	T	G	A	A	C	C	C	A
2L	-	2L-16887966	FBti0058019	EPgy2	ATTTATAC	TACATTTATACTCT		T	A	C	A	T	T	T	A	T	A	C	T	C	T
2L	-	2L-16887977	FBti0027205	EPgy2	TACTACTG	CTGTACTACTGTAA		C	T	G	T	A	C	T	A	C	T	G	T	A	A
2L	-	2L-16910414	FBti0025269	EPgy2	GTCTGTCT	CAAGTCTGTCTCCT		C	A	A	G	T	C	T	G	T	C	T	C	C	T
2L	-	2L-17050729	FBti0040291	EPgy2	GCATGGAT	AAGGCATGGATATT		A	A	G	G	C	A	T	G	G	A	T	A	T	T
2L	-	2L-17496960	FBti0039677	EPgy2	GAGTAGAC	GCAGAGTAGACTTT		G	C	A	G	A	G	T	A	G	A	C	T	T	T
2L	-	2L-17500909	FBti0040211	EPgy2	GGTGGGAT	CTTGGTGGGATGCG		C	T	T	G	G	T	G	G	G	A	T	G	C	G
2L	-	2L-18142011	FBti0039357	EPgy2	CCCATGTG	ATCCCCATGTGCTT		A	T	C	C	C	C	A	T	G	T	G	C	T	T
2L	-	2L-18454553	FBti0076134	EPgy2	GCTCGGAC	TTAGCTCGGACCCA		T	T	A	G	C	T	C	G	G	A	C	C	C	A
2L	-	2L-18454632	FBti0039504	EPgy2	ATAGAGCC	ATCATAGAGCCCAT		A	T	C	A	T	A	G	A	G	C	C	C	A	T
2L	-	2L-18598026	FBti0057945	EPgy2	GGTTGGCT	CCGGGTTGGCTGTA		C	C	G	G	G	T	T	G	G	C	T	G	T	A
2L	-	2L-18695199	FBti0025159	EPgy2	GGTACCAC	ATGGGTACCACGTT		A	T	G	G	G	T	A	C	C	A	C	G	T	T
2L	-	2L-18708578	FBti0039608	EPgy2	GGATTGAC	GGCGGATTGACGCT		G	G	C	G	G	A	T	T	G	A	C	G	C	T
2L	-	2L-18753583	FBti0039382	EPgy2	TTTAGTCA	GCCTTTAGTCATTT		G	C	C	T	T	T	A	G	T	C	A	T	T	T
2L	-	2L-18987262	FBti0039747	EPgy2	AATCAGCT	TTTAATCAGCTCAT		T	T	T	A	A	T	C	A	G	C	T	C	A	T
2L	-	2L-19024007	FBti0038723	EPgy2	GCTTGTGC	ACCGCTTGTGCTTA		A	C	C	G	C	T	T	G	T	G	C	T	T	A
2L	-	2L-19064969	FBti0075844	EPgy2	GGTTGAAG	TTGGGTTGAAGTAA		T	T	G	G	G	T	T	G	A	A	G	T	A	A
2L	-	2L-19126958	FBti0027060	EPgy2	GGACCAAG	AGGGGACCAAGTAA		A	G	G	G	G	A	C	C	A	A	G	T	A	A
2L	-	2L-19171701	FBti0057744	EPgy2	GTTTGGCA	TTGGTTTGGCACTA		T	T	G	G	T	T	T	G	G	C	A	C	T	A
2L	-	2L-19185980	FBti0075894	EPgy2	CTCGGATC	TTTCTCGGATCAAT		T	T	T	C	T	C	G	G	A	T	C	A	A	T
2L	-	2L-19414502	FBti0025156	EPgy2	GTCTCTTT	TTGGTCTCTTTATT		T	T	G	G	T	C	T	C	T	T	T	A	T	T
2L	-	2L-19426319	FBti0057783	EPgy2	CGCTGTGG	AAACGCTGTGGTAA		A	A	A	C	G	C	T	G	T	G	G	T	A	A
2L	-	2L-19439953	FBti0027130	EPgy2	ATCCATCC	ACAATCCATCCACT		A	C	A	A	T	C	C	A	T	C	C	A	C	T
2L	-	2L-19444805	FBti0076006	EPgy2	GTTTCGTG	TCAGTTTCGTGCAA		T	C	A	G	T	T	T	C	G	T	G	C	A	A
2L	-	2L-19492914	FBti0039410	EPgy2	TTCAACAC	ATATTCAACACCAT		A	T	A	T	T	C	A	A	C	A	C	C	A	T
2L	-	2L-19549893	FBti0033293	EPgy2	GCACAGGC	AACGCACAGGCAAT		A	A	C	G	C	A	C	A	G	G	C	A	A	T
2L	-	2L-19577283	FBti0057887	EPgy2	GCTCCGAT	TATGCTCCGATGGT		T	A	T	G	C	T	C	C	G	A	T	G	G	T
2L	-	2L-19791233	FBti0039791	EPgy2	TGCCAAAC	TCTTGCCAAACGTT		T	C	T	T	G	C	C	A	A	A	C	G	T	T
2L	-	2L-19791733	FBti0058012	EPgy2	AGCGGGAG	AGCAGCGGGAGCGA		A	G	C	A	G	C	G	G	G	A	G	C	G	A
2L	-	2L-19795789	FBti0040062	EPgy2	GTCCCAGT	ACAGTCCCAGTTTT		A	C	A	G	T	C	C	C	A	G	T	T	T	T
2L	-	2L-19816306	FBti0100364	EPgy2	CATATGTG	ATACATATGTGCAT		A	T	A	C	A	T	A	T	G	T	G	C	A	T
2L	-	2L-20060937	FBti0040034	EPgy2	CTCCCACC	CAGCTCCCACCGTT		C	A	G	C	T	C	C	C	A	C	C	G	T	T
2L	-	2L-20082751	FBti0040191	EPgy2	GGCGAAAC	AAAGGCGAAACGGA		A	A	A	G	G	C	G	A	A	A	C	G	G	A
2L	-	2L-20091190	FBti0039552	EPgy2	GGTCTAGT	ATTGGTCTAGTAAT		A	T	T	G	G	T	C	T	A	G	T	A	A	T
2L	-	2L-20091309	FBti0040179	EPgy2	GACCGTGC	TTTGACCGTGCTCA		T	T	T	G	A	C	C	G	T	G	C	T	C	A
2L	-	2L-20094197	FBti0040182	EPgy2	GTCTGCAT	ATAGTCTGCATTAT		A	T	A	G	T	C	T	G	C	A	T	T	A	T
2L	-	2L-20223124	FBti0038983	EPgy2	GGCGTGCC	AATGGCGTGCCACT		A	A	T	G	G	C	G	T	G	C	C	A	C	T
2L	-	2L-20434836	FBti0075903	EPgy2	CACCAAAG	AGACACCAAAGTCA		A	G	A	C	A	C	C	A	A	A	G	T	C	A
2L	-	2L-20716173	FBti0057885	EPgy2	GGCAGCGT	ATGGGCAGCGTAAA		A	T	G	G	G	C	A	G	C	G	T	A	A	A
2L	-	2L-20734200	FBti0039494	EPgy2	GTTCATTC	ATAGTTCATTCAAT		A	T	A	G	T	T	C	A	T	T	C	A	A	T
2L	-	2L-20757859	FBti0039783	EPgy2	AGTGAGAC	AGCAGTGAGACCTT		A	G	C	A	G	T	G	A	G	A	C	C	T	T
2L	-	2L-20824619	FBti0039338	EPgy2	GTCGGCGG	AAAGTCGGCGGCGT		A	A	A	G	T	C	G	G	C	G	G	C	G	T
2L	-	2L-21156236	FBti0038690	EPgy2	GCTGAGTC	ATTGCTGAGTCTTT		A	T	T	G	C	T	G	A	G	T	C	T	T	T
2L	-	2L-21163023	FBti0039166	EPgy2	GAATGACC	ATGGAATGACCAGA		A	T	G	G	A	A	T	G	A	C	C	A	G	A
2L	-	2L-21168663	FBti0057677	EPgy2	GTCTGGAC	CTCGTCTGGACAAG		C	T	C	G	T	C	T	G	G	A	C	A	A	G
2L	-	2L-21179647	FBti0040180	EPgy2	CCCACGGG	ACACCCACGGGCCA		A	C	A	C	C	C	A	C	G	G	G	C	C	A
2L	-	2L-21205783	FBti0040159	EPgy2	TGTGGCCA	CAGTGTGGCCACAC		C	A	G	T	G	T	G	G	C	C	A	C	A	C
2L	-	2L-21206382	FBti0057845	EPgy2	CACACAAG	ATGCACACAAGTAA		A	T	G	C	A	C	A	C	A	A	G	T	A	A
2L	-	2L-21276087	FBti0038716	EPgy2	TGCGTATG	TAGTGCGTATGAGT		T	A	G	T	G	C	G	T	A	T	G	A	G	T
2L	-	2L-21309750	FBti0040005	EPgy2	CATTAGTT	TCACATTAGTTTAT		T	C	A	C	A	T	T	A	G	T	T	T	A	T
2L	-	2L-21319023	FBti0057990	EPgy2	GCGCTTTG	AGAGCGCTTTGGAT		A	G	A	G	C	G	C	T	T	T	G	G	A	T
2L	-	2L-21343901	FBti0039425	EPgy2	CCCACGAG	ATGCCCACGAGAAA		A	T	G	C	C	C	A	C	G	A	G	A	A	A
2L	-	2L-21401173	FBti0033174	EPgy2	GGCTACTC	AGGGGCTACTCTCT		A	G	G	G	G	C	T	A	C	T	C	T	C	T
2L	-	2L-21454383	FBti0057657	EPgy2	GCAGAGCC	AAAGCAGAGCCTTT		A	A	A	G	C	A	G	A	G	C	C	T	T	T
2L	-	2L-21571863	FBti0057886	EPgy2	CTTCAGAC	ATACTTCAGACAAA		A	T	A	C	T	T	C	A	G	A	C	A	A	A
2L	-	2L-21618802	FBti0100473	EPgy2	GTGCAGCT	TGGGTGCAGCTTAT		T	G	G	G	T	G	C	A	G	C	T	T	A	T
2L	-	2L-21632573	FBti0027253	EPgy2	GCCCCCAC	AGTGCCCCCACAAT		A	G	T	G	C	C	C	C	C	A	C	A	A	T
2L	-	2L-21677291	FBti0057650	EPgy2	CTCCAGGG	ACGCTCCAGGGTGA		A	C	G	C	T	C	C	A	G	G	G	T	G	A
2L	-	2L-21753820	FBti0100350	EPgy2	TTGCCGCA	CAATTGCCGCAGTA		C	A	A	T	T	G	C	C	G	C	A	G	T	A
2L	-	2L-22182454	FBti0075937	EPgy2	GTCCATCC	AAGGTCCATCCCTG		A	A	G	G	T	C	C	A	T	C	C	C	T	G
2L	-	2L-22185957	FBti0075896	EPgy2	GTCTGGAC	CTGGTCTGGACGAC		C	T	G	G	T	C	T	G	G	A	C	G	A	C
2R	-	2R-716784	FBti0057802	EPgy2	GGACATGG	AGCGGACATGGAGC		A	G	C	G	G	A	C	A	T	G	G	A	G	C
2R	-	2R-716994	FBti0077799	EPgy2	GTGTAGCC	CCAGTGTAGCCCAC		C	C	A	G	T	G	T	A	G	C	C	C	A	C
2R	-	2R-1580814	FBti0033375	EPgy2	ATTCCCAC	TTGATTCCCACATA		T	T	G	A	T	T	C	C	C	A	C	A	T	A
2R	-	2R-1648484	FBti0075946	EPgy2	CCCTCAGC	TGGCCCTCAGCAAT		T	G	G	C	C	C	T	C	A	G	C	A	A	T
2R	-	2R-1669688	FBti0039964	EPgy2	ATCTGTAT	TATATCTGTATCAT		T	A	T	A	T	C	T	G	T	A	T	C	A	T
2R	-	2R-1684982	FBti0057935	EPgy2	GGTAAAAC	ATTGGTAAAACCAA		A	T	T	G	G	T	A	A	A	A	C	C	A	A
2R	-	2R-1692020	FBti0057676	EPgy2	GTGGCGGC	AATGTGGCGGCAAA		A	A	T	G	T	G	G	C	G	G	C	A	A	A
2R	-	2R-1768797	FBti0024850	EPgy2	GTCACGTT	ACGGTCACGTTAAT		A	C	G	G	T	C	A	C	G	T	T	A	A	T
2R	-	2R-1833260	FBti0033334	EPgy2	GACATTGT	TTGGACATTGTTGC		T	T	G	G	A	C	A	T	T	G	T	T	G	C
2R	-	2R-1923150	FBti0039363	EPgy2	ACGAAAGT	CTAACGAAAGTTGT		C	T	A	A	C	G	A	A	A	G	T	T	G	T
2R	-	2R-2019440	FBti0038679	EPgy2	CTACAATA	ATACTACAATATAT		A	T	A	C	T	A	C	A	A	T	A	T	A	T
2R	-	2R-2101648	FBti0075859	EPgy2	CGTCTCTC	TCGCGTCTCTCTAA		T	C	G	C	G	T	C	T	C	T	C	T	A	A
2R	-	2R-2102200	FBti0039789	EPgy2	CGACAGAC	AAGCGACAGACATA		A	A	G	C	G	A	C	A	G	A	C	A	T	A
2R	-	2R-2146561	FBti0057948	EPgy2	CGTGGGCC	AGACGTGGGCCCTT		A	G	A	C	G	T	G	G	G	C	C	C	T	T
2R	-	2R-2520638	FBti0024077	EPgy2	GTTGGATC	GTGGTTGGATCGTT		G	T	G	G	T	T	G	G	A	T	C	G	T	T
2R	-	2R-2523747	FBti0039986	EPgy2	CGCTGCAC	AATCGCTGCACCAT		A	A	T	C	G	C	T	G	C	A	C	C	A	T
2R	-	2R-2583946	FBti0076142	EPgy2	CTCGGCTC	CTACTCGGCTCTAT		C	T	A	C	T	C	G	G	C	T	C	T	A	T
2R	-	2R-2628392	FBti0075435	EPgy2	CCCAAGGC	TTCCCCAAGGCGCA		T	T	C	C	C	C	A	A	G	G	C	G	C	A
2R	-	2R-2646420	FBti0039807	EPgy2	CGACAACC	TTCCGACAACCCAA		T	T	C	C	G	A	C	A	A	C	C	C	A	A
2R	-	2R-2700032	FBti0039693	EPgy2	ATACGAAT	ATAATACGAATAAT		A	T	A	A	T	A	C	G	A	A	T	A	A	T
2R	-	2R-2760231	FBti0039715	EPgy2	GGAAGAAG	TGTGGAAGAAGTGT		T	G	T	G	G	A	A	G	A	A	G	T	G	T
2R	-	2R-2873185	FBti0039793	EPgy2	CATGGGTG	ACACATGGGTGTAT		A	C	A	C	A	T	G	G	G	T	G	T	A	T
2R	-	2R-2949177	FBti0040057	EPgy2	ATAATATT	TAAATAATATTTAT		T	A	A	A	T	A	A	T	A	T	T	T	A	T
2R	-	2R-3058256	FBti0076107	EPgy2	GTTCACTC	AAAGTTCACTCATT		A	A	A	G	T	T	C	A	C	T	C	A	T	T
2R	-	2R-3133013	FBti0038807	EPgy2	ATCCAGCC	GACATCCAGCCAAT		G	A	C	A	T	C	C	A	G	C	C	A	A	T
2R	-	2R-3165581	FBti0057995	EPgy2	GTCCAGCT	TTAGTCCAGCTCTA		T	T	A	G	T	C	C	A	G	C	T	C	T	A
2R	-	2R-3170022	FBti0040120	EPgy2	CCCAAGAC	AACCCCAAGACGGT		A	A	C	C	C	C	A	A	G	A	C	G	G	T
2R	-	2R-3213162	FBti0039558	EPgy2	ATTCGAGC	ACCATTCGAGCGAA		A	C	C	A	T	T	C	G	A	G	C	G	A	A
2R	-	2R-3274597	FBti0039771	EPgy2	CCCCAGAC	ATGCCCCAGACAAT		A	T	G	C	C	C	C	A	G	A	C	A	A	T
2R	-	2R-3361611	FBti0040269	EPgy2	AACTGAAC	AGGAACTGAACATT		A	G	G	A	A	C	T	G	A	A	C	A	T	T
2R	-	2R-3377452	FBti0057871	EPgy2	AGTGAGAG	ACCAGTGAGAGGTT		A	C	C	A	G	T	G	A	G	A	G	G	T	T
2R	-	2R-3383737	FBti0027038	EPgy2	GTCCGTAC	CTCGTCCGTACCTC		C	T	C	G	T	C	C	G	T	A	C	C	T	C
2R	-	2R-3387363	FBti0033263	EPgy2	GCGAATCC	ACAGCGAATCCATT		A	C	A	G	C	G	A	A	T	C	C	A	T	T
2R	-	2R-3420504	FBti0040042	EPgy2	GGTCGGTG	ATGGGTCGGTGGAT		A	T	G	G	G	T	C	G	G	T	G	G	A	T
2R	-	2R-3428946	FBti0038948	EPgy2	GGCCAAAC	ATGGGCCAAACCCG		A	T	G	G	G	C	C	A	A	A	C	C	C	G
2R	-	2R-3474625	FBti0039804	EPgy2	CGCTGAGT	TACCGCTGAGTTGA		T	A	C	C	G	C	T	G	A	G	T	T	G	A
2R	-	2R-3485426	FBti0038718	EPgy2	CCCCAGAC	CTGCCCCAGACGAT		C	T	G	C	C	C	C	A	G	A	C	G	A	T
2R	-	2R-3556580	FBti0039542	EPgy2	GGGCCGTT	TTGGGGCCGTTCAA		T	T	G	G	G	G	C	C	G	T	T	C	A	A
2R	-	2R-3670157	FBti0039179	EPgy2	GCTCTACG	AGTGCTCTACGTTT		A	G	T	G	C	T	C	T	A	C	G	T	T	T
2R	-	2R-3681368	FBti0075857	EPgy2	GCCGAGAC	ATGGCCGAGACCGA		A	T	G	G	C	C	G	A	G	A	C	C	G	A
2R	-	2R-3699736	FBti0039570	EPgy2	GTCCTGCC	TATGTCCTGCCCGA		T	A	T	G	T	C	C	T	G	C	C	C	G	A
2R	-	2R-3775820	FBti0057867	EPgy2	TGTGGAGC	TAGTGTGGAGCTTT		T	A	G	T	G	T	G	G	A	G	C	T	T	T
2R	-	2R-3804498	FBti0057784	EPgy2	GATTAGCT	TGAGATTAGCTCAT		T	G	A	G	A	T	T	A	G	C	T	C	A	T
2R	-	2R-3859506	FBti0076016	EPgy2	GACATGTC	TGTGACATGTCTTT		T	G	T	G	A	C	A	T	G	T	C	T	T	T
2R	-	2R-3970606	FBti0057730	EPgy2	CCAAAGCC	TGACCAAAGCCATT		T	G	A	C	C	A	A	A	G	C	C	A	T	T
2R	-	2R-3985953	FBti0039394	EPgy2	GTCTAAGC	ATTGTCTAAGCAAA		A	T	T	G	T	C	T	A	A	G	C	A	A	A
2R	-	2R-4033868	FBti0040152	EPgy2	CTCGGCGG	ACACTCGGCGGGAT		A	C	A	C	T	C	G	G	C	G	G	G	A	T
2R	-	2R-4057807	FBti0076003	EPgy2	GACTCAGG	ATGGACTCAGGGAA		A	T	G	G	A	C	T	C	A	G	G	G	A	A
2R	-	2R-4102935	FBti0039495	EPgy2	TATTAGAT	TGTTATTAGATTGA		T	G	T	T	A	T	T	A	G	A	T	T	G	A
2R	-	2R-4127989	FBti0039440	EPgy2	GTCGGAAC	AATGTCGGAACACA		A	A	T	G	T	C	G	G	A	A	C	A	C	A
2R	-	2R-4214845	FBti0057960	EPgy2	GTTTGAGC	TTCGTTTGAGCTGT		T	T	C	G	T	T	T	G	A	G	C	T	G	T
2R	-	2R-4453337	FBti0033261	EPgy2	GTAAAAAC	TGGGTAAAAACTTA		T	G	G	G	T	A	A	A	A	A	C	T	T	A
2R	-	2R-4487429	FBti0039730	EPgy2	CACGCAAG	AAACACGCAAGAAA		A	A	A	C	A	C	G	C	A	A	G	A	A	A
2R	-	2R-4512546	FBti0057992	EPgy2	AACCCAAG	ATGAACCCAAGCAT		A	T	G	A	A	C	C	C	A	A	G	C	A	T
2R	-	2R-4519281	FBti0039489	EPgy2	ATCTGAGC	ATGATCTGAGCTGA		A	T	G	A	T	C	T	G	A	G	C	T	G	A
2R	-	2R-4620925	FBti0039897	EPgy2	GTTCGGCT	ATCGTTCGGCTCGT		A	T	C	G	T	T	C	G	G	C	T	C	G	T
2R	-	2R-4685818	FBti0027117	EPgy2	GTCCGAAG	GTTGTCCGAAGCGT		G	T	T	G	T	C	C	G	A	A	G	C	G	T
2R	-	2R-4747186	FBti0033161	EPgy2	ATGTGGTG	ATGATGTGGTGTCA		A	T	G	A	T	G	T	G	G	T	G	T	C	A
2R	-	2R-4801526	FBti0038946	EPgy2	GGCCAAGG	GCTGGCCAAGGAGT		G	C	T	G	G	C	C	A	A	G	G	A	G	T
2R	-	2R-4838557	FBti0038784	EPgy2	CTCTGGCA	AACCTCTGGCAAAA		A	A	C	C	T	C	T	G	G	C	A	A	A	A
2R	-	2R-4918576	FBti0040079	EPgy2	TCTGTAGT	GCATCTGTAGTGAA		G	C	A	T	C	T	G	T	A	G	T	G	A	A
2R	-	2R-4982122	FBti0027324	EPgy2	CTGCGGAC	GGGCTGCGGACCTT		G	G	G	C	T	G	C	G	G	A	C	C	T	T
2R	-	2R-5001373	FBti0039662	EPgy2	GCGCCAGC	TTTGCGCCAGCAAA		T	T	T	G	C	G	C	C	A	G	C	A	A	A
2R	-	2R-5001755	FBti0027368	EPgy2	TCCCTAAG	TCATCCCTAAGTAT		T	C	A	T	C	C	C	T	A	A	G	T	A	T
2R	-	2R-5009886	FBti0038094	EPgy2	ATTCGAAG	TCGATTCGAAGTGA		T	C	G	A	T	T	C	G	A	A	G	T	G	A
2R	-	2R-5031382	FBti0039717	EPgy2	GCCGCGCC	GTGGCCGCGCCGGG		G	T	G	G	C	C	G	C	G	C	C	G	G	G
2R	-	2R-5032493	FBti0024874	EPgy2	TACTTATG	ATGTACTTATGCAT		A	T	G	T	A	C	T	T	A	T	G	C	A	T
2R	-	2R-5073847	FBti0040069	EPgy2	GGCGAATC	ACAGGCGAATCACT		A	C	A	G	G	C	G	A	A	T	C	A	C	T
2R	-	2R-5277660	FBti0033278	EPgy2	GGCGAGGC	TTTGGCGAGGCTAT		T	T	T	G	G	C	G	A	G	G	C	T	A	T
2R	-	2R-5286211	FBti0027589	EPgy2	CCAGGAAC	ACACCAGGAACACT		A	C	A	C	C	A	G	G	A	A	C	A	C	T
2R	-	2R-5296543	FBti0057959	EPgy2	TGCTGCAG	AAATGCTGCAGGTT		A	A	A	T	G	C	T	G	C	A	G	G	T	T
2R	-	2R-5324905	FBti0057776	EPgy2	CGAAGGAC	AGACGAAGGACTTG		A	G	A	C	G	A	A	G	G	A	C	T	T	G
2R	-	2R-5329177	FBti0040049	EPgy2	CGAGAGAC	AGCCGAGAGACGAC		A	G	C	C	G	A	G	A	G	A	C	G	A	C
2R	-	2R-5330779	FBti0058005	EPgy2	CACCAGGG	GCACACCAGGGCTA		G	C	A	C	A	C	C	A	G	G	G	C	T	A
2R	-	2R-5434330	FBti0027139	EPgy2	GTCGAGGC	GTAGTCGAGGCAAT		G	T	A	G	T	C	G	A	G	G	C	A	A	T
2R	-	2R-5570835	FBti0039956	EPgy2	GCGCGAGA	AGAGCGCGAGATGA		A	G	A	G	C	G	C	G	A	G	A	T	G	A
2R	-	2R-5730956	FBti0039337	EPgy2	GTCCATGT	TCTGTCCATGTATA		T	C	T	G	T	C	C	A	T	G	T	A	T	A
2R	-	2R-5734036	FBti0027288	EPgy2	CGCTAACA	TAACGCTAACAATT		T	A	A	C	G	C	T	A	A	C	A	A	T	T
2R	-	2R-5762811	FBti0040214	EPgy2	GTGGGGTG	GCGGTGGGGTGTAT		G	C	G	G	T	G	G	G	G	T	G	T	A	T
2R	-	2R-5913178	FBti0057773	EPgy2	GTCTGGCC	AGTGTCTGGCCGTT		A	G	T	G	T	C	T	G	G	C	C	G	T	T
2R	-	2R-5982308	FBti0038080	EPgy2	AGTCGGCC	GGCAGTCGGCCAAT		G	G	C	A	G	T	C	G	G	C	C	A	A	T
2R	-	2R-5987161	FBti0025176	EPgy2	GATCAGAT	TTAGATCAGATCAC		T	T	A	G	A	T	C	A	G	A	T	C	A	C
2R	-	2R-5989014	FBti0038081	EPgy2	CCGTGTAC	TGGCCGTGTACGTT		T	G	G	C	C	G	T	G	T	A	C	G	T	T
2R	-	2R-6046083	FBti0040041	EPgy2	GCCCAAAT	AGAGCCCAAATCAA		A	G	A	G	C	C	C	A	A	A	T	C	A	A
2R	-	2R-6084031	FBti0075833	EPgy2	GTCCAAGC	TCTGTCCAAGCCAC		T	C	T	G	T	C	C	A	A	G	C	C	A	C
2R	-	2R-6101689	FBti0039004	EPgy2	GAGCCAGC	AGAGAGCCAGCCAT		A	G	A	G	A	G	C	C	A	G	C	C	A	T
2R	-	2R-6146773	FBti0039355	EPgy2	GCGTGACA	ATAGCGTGACACTT		A	T	A	G	C	G	T	G	A	C	A	C	T	T
2R	-	2R-6308619	FBti0057644	EPgy2	CCACAGCC	ACACCACAGCCATT		A	C	A	C	C	A	C	A	G	C	C	A	T	T
2R	-	2R-6365364	FBti0033379	EPgy2	CCACCGAC	TAACCACCGACATT		T	A	A	C	C	A	C	C	G	A	C	A	T	T
2R	-	2R-6429232	FBti0039810	EPgy2	GGCAGACT	AAAGGCAGACTTGG		A	A	A	G	G	C	A	G	A	C	T	T	G	G
2R	-	2R-6430996	FBti0039884	EPgy2	AACCAGAC	AGTAACCAGACCAA		A	G	T	A	A	C	C	A	G	A	C	C	A	A
2R	-	2R-6436245	FBti0076127	EPgy2	AGTCGAAA	AGTAGTCGAAACCG		A	G	T	A	G	T	C	G	A	A	A	C	C	G
2R	-	2R-6467529	FBti0038910	EPgy2	ATTCCAAG	CTGATTCCAAGTGA		C	T	G	A	T	T	C	C	A	A	G	T	G	A
2R	-	2R-6470035	FBti0057877	EPgy2	GGCCGCAC	ATGGGCCGCACATA		A	T	G	G	G	C	C	G	C	A	C	A	T	A
2R	-	2R-6627248	FBti0075831	EPgy2	GTACAACC	GCGGTACAACCGAC		G	C	G	G	T	A	C	A	A	C	C	G	A	C
2R	-	2R-6630822	FBti0038981	EPgy2	GTCCATGT	AGGGTCCATGTGTT		A	G	G	G	T	C	C	A	T	G	T	G	T	T
2R	-	2R-6694121	FBti0027603	EPgy2	GTTCAGAG	GCTGTTCAGAGTAT		G	C	T	G	T	T	C	A	G	A	G	T	A	T
2R	-	2R-6727178	FBti0057739	EPgy2	AGCAATTC	AGCAGCAATTCCTG		A	G	C	A	G	C	A	A	T	T	C	C	T	G
2R	-	2R-6748954	FBti0033362	EPgy2	GTACCGAT	ACAGTACCGATCCA		A	C	A	G	T	A	C	C	G	A	T	C	C	A
2R	-	2R-6752777	FBti0039480	EPgy2	GACGAAGC	TCAGACGAAGCGAA		T	C	A	G	A	C	G	A	A	G	C	G	A	A
2R	-	2R-6782002	FBti0027344	EPgy2	CACTGGCA	TTCCACTGGCACTT		T	T	C	C	A	C	T	G	G	C	A	C	T	T
2R	-	2R-6801830	FBti0038084	EPgy2	ACCTTGCA	AGCACCTTGCACTT		A	G	C	A	C	C	T	T	G	C	A	C	T	T
2R	-	2R-6957774	FBti0033144	EPgy2	CTCCAGGC	TGGCTCCAGGCTCT		T	G	G	C	T	C	C	A	G	G	C	T	C	T
2R	-	2R-7078573	FBti0076021	EPgy2	CGCGATAC	AAGCGCGATACAAA		A	A	G	C	G	C	G	A	T	A	C	A	A	A
2R	-	2R-7107549	FBti0057917	EPgy2	ATTCAGAT	ATAATTCAGATATA		A	T	A	A	T	T	C	A	G	A	T	A	T	A
2R	-	2R-7110178	FBti0039299	EPgy2	GATAGGAT	TGAGATAGGATAAT		T	G	A	G	A	T	A	G	G	A	T	A	A	T
2R	-	2R-7120445	FBti0039788	EPgy2	GGCGCCGT	ATGGGCGCCGTATT		A	T	G	G	G	C	G	C	C	G	T	A	T	T
2R	-	2R-7176528	FBti0075441	EPgy2	CTCGGTGC	ACACTCGGTGCCCA		A	C	A	C	T	C	G	G	T	G	C	C	C	A
2R	-	2R-7177145	FBti0039502	EPgy2	GAGGTAAC	TTAGAGGTAACTAA		T	T	A	G	A	G	G	T	A	A	C	T	A	A
2R	-	2R-7185020	FBti0039204	EPgy2	GTCGGCAC	AGGGTCGGCACTCA		A	G	G	G	T	C	G	G	C	A	C	T	C	A
2R	-	2R-7185366	FBti0039267	EPgy2	CAGCACAC	ACGCAGCACACTCT		A	C	G	C	A	G	C	A	C	A	C	T	C	T
2R	-	2R-7252622	FBti0033203	EPgy2	CACTGCAC	ACACACTGCACACT		A	C	A	C	A	C	T	G	C	A	C	A	C	T
2R	-	2R-7258650	FBti0033170	EPgy2	GTCACGTC	TGGGTCACGTCAGT		T	G	G	G	T	C	A	C	G	T	C	A	G	T
2R	-	2R-7489852	FBti0040251	EPgy2	ACTTTGAC	AGGACTTTGACAGT		A	G	G	A	C	T	T	T	G	A	C	A	G	T
2R	-	2R-7539157	FBti0076143	EPgy2	CTGCGTGT	ATACTGCGTGTGAA		A	T	A	C	T	G	C	G	T	G	T	G	A	A
2R	-	2R-7576212	FBti0040210	EPgy2	GGCCGAGC	ATAGGCCGAGCTAG		A	T	A	G	G	C	C	G	A	G	C	T	A	G
2R	-	2R-7578347	FBti0039808	EPgy2	GTCCGTGG	TTAGTCCGTGGTAC		T	T	A	G	T	C	C	G	T	G	G	T	A	C
2R	-	2R-7599742	FBti0027359	EPgy2	GTTTGGCC	AGCGTTTGGCCCGC		A	G	C	G	T	T	T	G	G	C	C	C	G	C
2R	-	2R-7731687	FBti0040236	EPgy2	CAAGCGAC	AGCCAAGCGACCTT		A	G	C	C	A	A	G	C	G	A	C	C	T	T
2R	-	2R-7778376	FBti0039922	EPgy2	GATTACAT	ATAGATTACATGTA		A	T	A	G	A	T	T	A	C	A	T	G	T	A
2R	-	2R-7787031	FBti0040219	EPgy2	GTCTCAAT	ACAGTCTCAATCGC		A	C	A	G	T	C	T	C	A	A	T	C	G	C
2R	-	2R-7912805	FBti0033253	EPgy2	GTCTCGCT	TTTGTCTCGCTCTT		T	T	T	G	T	C	T	C	G	C	T	C	T	T
2R	-	2R-8051897	FBti0027355	EPgy2	TTCTGTTC	CTGTTCTGTTCCGT		C	T	G	T	T	C	T	G	T	T	C	C	G	T
2R	-	2R-8057815	FBti0038072	EPgy2	GCACAAGG	AGAGCACAAGGGAA		A	G	A	G	C	A	C	A	A	G	G	G	A	A
2R	-	2R-8213885	FBti0039471	EPgy2	GTGTAGCT	TTAGTGTAGCTCTT		T	T	A	G	T	G	T	A	G	C	T	C	T	T
2R	-	2R-8225280	FBti0038708	EPgy2	AGCAGGTT	TGCAGCAGGTTTAT		T	G	C	A	G	C	A	G	G	T	T	T	A	T
2R	-	2R-8225570	FBti0025192	EPgy2	CTCCATGA	TTACTCCATGACCA		T	T	A	C	T	C	C	A	T	G	A	C	C	A
2R	-	2R-8313112	FBti0027150	EPgy2	GTTCGATC	TCAGTTCGATCTTC		T	C	A	G	T	T	C	G	A	T	C	T	T	C
2R	-	2R-8324948	FBti0027059	EPgy2	TGCGAACC	ACGTGCGAACCAGT		A	C	G	T	G	C	G	A	A	C	C	A	G	T
2R	-	2R-8432463	FBti0076414	EPgy2	GTGGTGAG	ACTGTGGTGAGTAT		A	C	T	G	T	G	G	T	G	A	G	T	A	T
2R	-	2R-8435804	FBti0076415	EPgy2	GTTTCGCC	TTGGTTTCGCCGGT		T	T	G	G	T	T	T	C	G	C	C	G	G	T
2R	-	2R-8481185	FBti0039963	EPgy2	GACTCGGT	AGGGACTCGGTTCT		A	G	G	G	A	C	T	C	G	G	T	T	C	T
2R	-	2R-8481196	FBti0039001	EPgy2	TCTTGGAG	TTATCTTGGAGTAA		T	T	A	T	C	T	T	G	G	A	G	T	A	A
2R	-	2R-8543312	FBti0038786	EPgy2	CTCCAGAC	AATCTCCAGACTTT		A	A	T	C	T	C	C	A	G	A	C	T	T	T
2R	-	2R-8557726	FBti0039647	EPgy2	CTCCAAAC	TCTCTCCAAACATA		T	C	T	C	T	C	C	A	A	A	C	A	T	A
2R	-	2R-8645024	FBti0039692	EPgy2	GCTCAGCT	TTGGCTCAGCTGAC		T	T	G	G	C	T	C	A	G	C	T	G	A	C
2R	-	2R-8743207	FBti0058028	EPgy2	GGTGTAAC	TAAGGTGTAACTAT		T	A	A	G	G	T	G	T	A	A	C	T	A	T
2R	-	2R-8824417	FBti0039427	EPgy2	AGCCAGCT	ATAAGCCAGCTGTT		A	T	A	A	G	C	C	A	G	C	T	G	T	T
2R	-	2R-9070082	FBti0057842	EPgy2	AACTGAAC	GAGAACTGAACCAA		G	A	G	A	A	C	T	G	A	A	C	C	A	A
2R	-	2R-9085526	FBti0040137	EPgy2	GCTCGGAT	AAAGCTCGGATGTG		A	A	A	G	C	T	C	G	G	A	T	G	T	G
2R	-	2R-9370708	FBti0033286	EPgy2	CGCGGGAC	ACGCGCGGGACTAT		A	C	G	C	G	C	G	G	G	A	C	T	A	T
2R	-	2R-9550198	FBti0025259	EPgy2	CAAAGTGC	CTACAAAGTGCTTA		C	T	A	C	A	A	A	G	T	G	C	T	T	A
2R	-	2R-9580933	FBti0039158	EPgy2	CCCTGCAC	TTGCCCTGCACACC		T	T	G	C	C	C	T	G	C	A	C	A	C	C
2R	-	2R-9741819	FBti0039761	EPgy2	AACTGGGG	CCAAACTGGGGCGC		C	C	A	A	A	C	T	G	G	G	G	C	G	C
2R	-	2R-9760270	FBti0024906	EPgy2	CATTAGGC	TGGCATTAGGCTCT		T	G	G	C	A	T	T	A	G	G	C	T	C	T
2R	-	2R-9841633	FBti0075988	EPgy2	AGCTGTTA	CCAAGCTGTTAGAC		C	C	A	A	G	C	T	G	T	T	A	G	A	C
2R	-	2R-9878183	FBti0024889	EPgy2	GTGTGGCT	ACTGTGTGGCTGTT		A	C	T	G	T	G	T	G	G	C	T	G	T	T
2R	-	2R-9883443	FBti0057922	EPgy2	GTTGGCGC	TTGGTTGGCGCGCT		T	T	G	G	T	T	G	G	C	G	C	G	C	T
2R	-	2R-9894360	FBti0025221	EPgy2	GATCGCTC	ATCGATCGCTCTTT		A	T	C	G	A	T	C	G	C	T	C	T	T	T
2R	-	2R-10056500	FBti0039144	EPgy2	GATCGGAC	GGGGATCGGACCTT		G	G	G	G	A	T	C	G	G	A	C	C	T	T
2R	-	2R-10061530	FBti0040205	EPgy2	CTCTCGGC	TTGCTCTCGGCTCT		T	T	G	C	T	C	T	C	G	G	C	T	C	T
2R	-	2R-10122927	FBti0039803	EPgy2	CTCCAGGG	TGGCTCCAGGGTCT		T	G	G	C	T	C	C	A	G	G	G	T	C	T
2R	-	2R-10144025	FBti0038776	EPgy2	GGTGAGGC	ATTGGTGAGGCCTT		A	T	T	G	G	T	G	A	G	G	C	C	T	T
2R	-	2R-10155523	FBti0039859	EPgy2	GTTTAAAC	ACGGTTTAAACTGA		A	C	G	G	T	T	T	A	A	A	C	T	G	A
2R	-	2R-10189828	FBti0075858	EPgy2	CTCTGTAC	ACGCTCTGTACAAG		A	C	G	C	T	C	T	G	T	A	C	A	A	G
2R	-	2R-10239795	FBti0027396	EPgy2	GACCAAGC	ATAGACCAAGCATA		A	T	A	G	A	C	C	A	A	G	C	A	T	A
2R	-	2R-10249442	FBti0057894	EPgy2	AGTGAGAG	ATCAGTGAGAGAAT		A	T	C	A	G	T	G	A	G	A	G	A	A	T
2R	-	2R-10250030	FBti0075967	EPgy2	GGTGAGAA	AAAGGTGAGAATAG		A	A	A	G	G	T	G	A	G	A	A	T	A	G
2R	-	2R-10372597	FBti0040130	EPgy2	GTCTGACC	TCCGTCTGACCGTA		T	C	C	G	T	C	T	G	A	C	C	G	T	A
2R	-	2R-10391512	FBti0039443	EPgy2	GGGCAGCG	ACGGGGCAGCGCAG		A	C	G	G	G	G	C	A	G	C	G	C	A	G
2R	-	2R-10488804	FBti0039314	EPgy2	GCGGGGGC	ACAGCGGGGGCACT		A	C	A	G	C	G	G	G	G	G	C	A	C	T
2R	-	2R-10492882	FBti0038898	EPgy2	GTCAGAAG	TCAGTCAGAAGCGA		T	C	A	G	T	C	A	G	A	A	G	C	G	A
2R	-	2R-10509175	FBti0027286	EPgy2	GTCCGACC	TCGGTCCGACCGCT		T	C	G	G	T	C	C	G	A	C	C	G	C	T
2R	-	2R-11033846	FBti0038797	EPgy2	GTTCAATC	TTAGTTCAATCGTT		T	T	A	G	T	T	C	A	A	T	C	G	T	T
2R	-	2R-11140164	FBti0039467	EPgy2	CATCACAT	AGCCATCACATTTT		A	G	C	C	A	T	C	A	C	A	T	T	T	T
2R	-	2R-11237608	FBti0027122	EPgy2	CATCGGCG	GTACATCGGCGGGC		G	T	A	C	A	T	C	G	G	C	G	G	G	C
2R	-	2R-11340687	FBti0075916	EPgy2	GACTGACT	TTGGACTGACTGCT		T	T	G	G	A	C	T	G	A	C	T	G	C	T
2R	-	2R-11425935	FBti0025160	EPgy2	CACACACC	ACACACACACCCTT		A	C	A	C	A	C	A	C	A	C	C	C	T	T
2R	-	2R-11453293	FBti0076158	EPgy2	CGCCAAAT	ATGCGCCAAATCAA		A	T	G	C	G	C	C	A	A	A	T	C	A	A
2R	-	2R-11748857	FBti0100347	EPgy2	GCCTGGAG	AGAGCCTGGAGCCA		A	G	A	G	C	C	T	G	G	A	G	C	C	A
2R	-	2R-11778443	FBti0040131	EPgy2	CCCTGACC	ATTCCCTGACCCAT		A	T	T	C	C	C	T	G	A	C	C	C	A	T
2R	-	2R-11819440	FBti0040256	EPgy2	ACTCAGAC	TCTACTCAGACGAT		T	C	T	A	C	T	C	A	G	A	C	G	A	T
2R	-	2R-11878766	FBti0076087	EPgy2	GCCAGGGC	AATGCCAGGGCAAT		A	A	T	G	C	C	A	G	G	G	C	A	A	T
2R	-	2R-11902343	FBti0039644	EPgy2	GCATAACC	TTCGCATAACCGAT		T	T	C	G	C	A	T	A	A	C	C	G	A	T
2R	-	2R-11934907	FBti0039362	EPgy2	GGCGTCGC	TTCGGCGTCGCCTG		T	T	C	G	G	C	G	T	C	G	C	C	T	G
2R	-	2R-12011946	FBti0039577	EPgy2	GCCCAAAC	ACTGCCCAAACCAA		A	C	T	G	C	C	C	A	A	A	C	C	A	A
2R	-	2R-12051745	FBti0040223	EPgy2	AGCGGAAC	CTGAGCGGAACCAA		C	T	G	A	G	C	G	G	A	A	C	C	A	A
2R	-	2R-12083824	FBti0027141	EPgy2	GGTCGTGT	GTGGGTCGTGTCAT		G	T	G	G	G	T	C	G	T	G	T	C	A	T
2R	-	2R-12109315	FBti0040073	EPgy2	ATCCAACC	ACAATCCAACCATA		A	C	A	A	T	C	C	A	A	C	C	A	T	A
2R	-	2R-12138684	FBti0024108	EPgy2	GTTCAGAT	TACGTTCAGATAAA		T	A	C	G	T	T	C	A	G	A	T	A	A	A
2R	-	2R-12152221	FBti0040157	EPgy2	TGCTGGAC	TCGTGCTGGACTGA		T	C	G	T	G	C	T	G	G	A	C	T	G	A
2R	-	2R-12159576	FBti0040246	EPgy2	ATCCAGCG	AAAATCCAGCGGCA		A	A	A	A	T	C	C	A	G	C	G	G	C	A
2R	-	2R-12221539	FBti0040043	EPgy2	GTCTCGAC	TCTGTCTCGACCAA		T	C	T	G	T	C	T	C	G	A	C	C	A	A
2R	-	2R-12474360	FBti0038785	EPgy2	GTGTAATC	ATCGTGTAATCTCT		A	T	C	G	T	G	T	A	A	T	C	T	C	T
2R	-	2R-12491995	FBti0038756	EPgy2	GTCCCGTC	CTGGTCCCGTCTTT		C	T	G	G	T	C	C	C	G	T	C	T	T	T
2R	-	2R-12555563	FBti0075962	EPgy2	CTCCGAGC	TTTCTCCGAGCAGC		T	T	T	C	T	C	C	G	A	G	C	A	G	C
2R	-	2R-12718162	FBti0040060	EPgy2	GTACAGAC	GCGGTACAGACGAT		G	C	G	G	T	A	C	A	G	A	C	G	A	T
2R	-	2R-12755764	FBti0039239	EPgy2	GTGGAGGT	ATGGTGGAGGTACT		A	T	G	G	T	G	G	A	G	G	T	A	C	T
2R	-	2R-12838938	FBti0076046	EPgy2	ATCGGTAC	TTCATCGGTACCTT		T	T	C	A	T	C	G	G	T	A	C	C	T	T
2R	-	2R-12892998	FBti0039320	EPgy2	GTCTGGCT	GTGGTCTGGCTTAG		G	T	G	G	T	C	T	G	G	C	T	T	A	G
2R	-	2R-12984903	FBti0040071	EPgy2	AGCTGTTC	AACAGCTGTTCTGT		A	A	C	A	G	C	T	G	T	T	C	T	G	T
2R	-	2R-12985171	FBti0057752	EPgy2	GACTGTAC	TGTGACTGTACCTT		T	G	T	G	A	C	T	G	T	A	C	C	T	T
2R	-	2R-13030942	FBti0039305	EPgy2	AATTGAAC	AACAATTGAACCTT		A	A	C	A	A	T	T	G	A	A	C	C	T	T
2R	-	2R-13268151	FBti0076092	EPgy2	CACTGAGC	TCCCACTGAGCTAT		T	C	C	C	A	C	T	G	A	G	C	T	A	T
2R	-	2R-13307069	FBti0040063	EPgy2	TACAATTT	GCATACAATTTACG		G	C	A	T	A	C	A	A	T	T	T	A	C	G
2R	-	2R-13308443	FBti0039847	EPgy2	GTGTTGGG	ATTGTGTTGGGGGT		A	T	T	G	T	G	T	T	G	G	G	G	G	T
2R	-	2R-13315468	FBti0027373	EPgy2	GTAAAGTC	CAAGTAAAGTCGAG		C	A	A	G	T	A	A	A	G	T	C	G	A	G
2R	-	2R-13326423	FBti0076108	EPgy2	GCCAAGAG	TGGGCCAAGAGTAT		T	G	G	G	C	C	A	A	G	A	G	T	A	T
2R	-	2R-13339714	FBti0039550	EPgy2	AGCGAATA	GAAAGCGAATATTA		G	A	A	A	G	C	G	A	A	T	A	T	T	A
2R	-	2R-13349847	FBti0027126	EPgy2	CTCTAGGT	GAACTCTAGGTTGC		G	A	A	C	T	C	T	A	G	G	T	T	G	C
2R	-	2R-13459712	FBti0039021	EPgy2	AACTGAAG	TTCAACTGAAGCAG		T	T	C	A	A	C	T	G	A	A	G	C	A	G
2R	-	2R-13477894	FBti0076084	EPgy2	TCGGGCGA	TGGTCGGGCGAGAC		T	G	G	T	C	G	G	G	C	G	A	G	A	C
2R	-	2R-13553274	FBti0039485	EPgy2	GGCCAACT	TTGGGCCAACTCTT		T	T	G	G	G	C	C	A	A	C	T	C	T	T
2R	-	2R-13556917	FBti0039482	EPgy2	CTCTGATC	AAACTCTGATCAGA		A	A	A	C	T	C	T	G	A	T	C	A	G	A
2R	-	2R-13580978	FBti0027194	EPgy2	TCTCGGCC	TGTTCTCGGCCCGT		T	G	T	T	C	T	C	G	G	C	C	C	G	T
2R	-	2R-13602015	FBti0076160	EPgy2	CCATTGCC	ATACCATTGCCGAT		A	T	A	C	C	A	T	T	G	C	C	G	A	T
2R	-	2R-13604806	FBti0024905	EPgy2	GGCAATGG	ATAGGCAATGGGTT		A	T	A	G	G	C	A	A	T	G	G	G	T	T
2R	-	2R-13648465	FBti0039368	EPgy2	GACCGGGG	AGAGACCGGGGCTA		A	G	A	G	A	C	C	G	G	G	G	C	T	A
2R	-	2R-13676849	FBti0039950	EPgy2	CTTCTGCT	CTGCTTCTGCTCCT		C	T	G	C	T	T	C	T	G	C	T	C	C	T
2R	-	2R-13677252	FBti0033269	EPgy2	ATCCCCAG	AAGATCCCCAGCGA		A	A	G	A	T	C	C	C	C	A	G	C	G	A
2R	-	2R-13742655	FBti0038894	EPgy2	CTCGTGTT	CAGCTCGTGTTGCT		C	A	G	C	T	C	G	T	G	T	T	G	C	T
2R	-	2R-13759522	FBti0027073	EPgy2	CGTCAGGT	GTCCGTCAGGTGTT		G	T	C	C	G	T	C	A	G	G	T	G	T	T
2R	-	2R-13920621	FBti0024083	EPgy2	ATTCAGGC	ATTATTCAGGCCCC		A	T	T	A	T	T	C	A	G	G	C	C	C	C
2R	-	2R-13982384	FBti0039212	EPgy2	GGTTAAAG	TTGGGTTAAAGTTT		T	T	G	G	G	T	T	A	A	A	G	T	T	T
2R	-	2R-14016056	FBti0075948	EPgy2	CTTCGGTC	CGACTTCGGTCCAT		C	G	A	C	T	T	C	G	G	T	C	C	A	T
2R	-	2R-14038974	FBti0040287	EPgy2	CTCCAGGT	ATTCTCCAGGTGCG		A	T	T	C	T	C	C	A	G	G	T	G	C	G
2R	-	2R-14059048	FBti0040185	EPgy2	CTGTTGAC	CATCTGTTGACCGG		C	A	T	C	T	G	T	T	G	A	C	C	G	G
2R	-	2R-14071576	FBti0027217	EPgy2	GTCAGTCC	AGAGTCAGTCCAAA		A	G	A	G	T	C	A	G	T	C	C	A	A	A
2R	-	2R-14086780	FBti0039178	EPgy2	GGCCAGTT	AACGGCCAGTTACA		A	A	C	G	G	C	C	A	G	T	T	A	C	A
2R	-	2R-14147219	FBti0075965	EPgy2	TGCGTGCT	TTGTGCGTGCTGTA		T	T	G	T	G	C	G	T	G	C	T	G	T	A
2R	-	2R-14176247	FBti0039841	EPgy2	CTCTAGCC	TTTCTCTAGCCCAA		T	T	T	C	T	C	T	A	G	C	C	C	A	A
2R	-	2R-14285434	FBti0027296	EPgy2	GACGAGCC	ATCGACGAGCCCAT		A	T	C	G	A	C	G	A	G	C	C	C	A	T
2R	-	2R-14294443	FBti0038892	EPgy2	CCAAATCA	AAGCCAAATCACTT		A	A	G	C	C	A	A	A	T	C	A	C	T	T
2R	-	2R-14298979	FBti0038837	EPgy2	GTTCAGTA	TTCGTTCAGTACGA		T	T	C	G	T	T	C	A	G	T	A	C	G	A
2R	-	2R-14327986	FBti0040031	EPgy2	GATGGCGC	ATGGATGGCGCTTC		A	T	G	G	A	T	G	G	C	G	C	T	T	C
2R	-	2R-14499274	FBti0057775	EPgy2	GCTTAGAT	ATGGCTTAGATTAA		A	T	G	G	C	T	T	A	G	A	T	T	A	A
2R	-	2R-14499353	FBti0027037	EPgy2	AGTCAACC	AAAAGTCAACCAGT		A	A	A	A	G	T	C	A	A	C	C	A	G	T
2R	-	2R-14512594	FBti0038986	EPgy2	CCCTGTGT	GGACCCTGTGTGCG		G	G	A	C	C	C	T	G	T	G	T	G	C	G
2R	-	2R-14526788	FBti0038763	EPgy2	TTCTGTGC	TTATTCTGTGCTCT		T	T	A	T	T	C	T	G	T	G	C	T	C	T
2R	-	2R-14538514	FBti0038793	EPgy2	TCTGGCCC	TGTTCTGGCCCAAA		T	G	T	T	C	T	G	G	C	C	C	A	A	A
2R	-	2R-14740544	FBti0039444	EPgy2	TCTGGGGC	TTATCTGGGGCGTA		T	T	A	T	C	T	G	G	G	G	C	G	T	A
2R	-	2R-14749301	FBti0039591	EPgy2	GATGAGGC	AGAGATGAGGCCAT		A	G	A	G	A	T	G	A	G	G	C	C	A	T
2R	-	2R-14858596	FBti0040237	EPgy2	CTACGGGT	CCTCTACGGGTGTG		C	C	T	C	T	A	C	G	G	G	T	G	T	G
2R	-	2R-14860427	FBti0058029	EPgy2	CACTGGCC	TCGCACTGGCCCAA		T	C	G	C	A	C	T	G	G	C	C	C	A	A
2R	-	2R-15013777	FBti0038844	EPgy2	GCTTGGAG	AACGCTTGGAGCCT		A	A	C	G	C	T	T	G	G	A	G	C	C	T
2R	-	2R-15052368	FBti0033354	EPgy2	GTCGACGC	GCAGTCGACGCTGA		G	C	A	G	T	C	G	A	C	G	C	T	G	A
2R	-	2R-15245351	FBti0076080	EPgy2	GCCCGAGA	TCAGCCCGAGAAGT		T	C	A	G	C	C	C	G	A	G	A	A	G	T
2R	-	2R-15283655	FBti0033285	EPgy2	GGCCAGGC	TCTGGCCAGGCCAA		T	C	T	G	G	C	C	A	G	G	C	C	A	A
2R	-	2R-15337649	FBti0076010	EPgy2	GGGTGAAG	TATGGGTGAAGTGA		T	A	T	G	G	G	T	G	A	A	G	T	G	A
2R	-	2R-15339124	FBti0057703	EPgy2	GCAACAAC	AAAGCAACAACAGC		A	A	A	G	C	A	A	C	A	A	C	A	G	C
2R	-	2R-15388816	FBti0057919	EPgy2	GGTCGCTC	AAGGGTCGCTCAAA		A	A	G	G	G	T	C	G	C	T	C	A	A	A
2R	-	2R-15518371	FBti0039739	EPgy2	GGTCGGCT	TTAGGTCGGCTCCA		T	T	A	G	G	T	C	G	G	C	T	C	C	A
2R	-	2R-15525048	FBti0057828	EPgy2	CATTGAAC	ATTCATTGAACTAA		A	T	T	C	A	T	T	G	A	A	C	T	A	A
2R	-	2R-15556930	FBti0039018	EPgy2	CACCAGAC	AACCACCAGACATT		A	A	C	C	A	C	C	A	G	A	C	A	T	T
2R	-	2R-15701038	FBti0039143	EPgy2	GGCCCCTC	GGGGGCCCCTCTTT		G	G	G	G	G	C	C	C	C	T	C	T	T	T
2R	-	2R-15714051	FBti0076145	EPgy2	CCCCCCAC	GAACCCCCCACTCA		G	A	A	C	C	C	C	C	C	A	C	T	C	A
2R	-	2R-16150357	FBti0039960	EPgy2	ATGTGGTG	TAGATGTGGTGTAT		T	A	G	A	T	G	T	G	G	T	G	T	A	T
2R	-	2R-16166432	FBti0057941	EPgy2	GGTCGGGA	CTTGGTCGGGAGGT		C	T	T	G	G	T	C	G	G	G	A	G	G	T
2R	-	2R-16177021	FBti0040174	EPgy2	CTCTAGCC	TTGCTCTAGCCGCA		T	T	G	C	T	C	T	A	G	C	C	G	C	A
2R	-	2R-16199541	FBti0038985	EPgy2	AGTGCGAC	AGCAGTGCGACCAT		A	G	C	A	G	T	G	C	G	A	C	C	A	T
2R	-	2R-16203415	FBti0027109	EPgy2	TTCTCGTG	TTGTTCTCGTGGTA		T	T	G	T	T	C	T	C	G	T	G	G	T	A
2R	-	2R-16208076	FBti0027159	EPgy2	CGCGGACA	ATACGCGGACATAG		A	T	A	C	G	C	G	G	A	C	A	T	A	G
2R	-	2R-16510907	FBti0057851	EPgy2	GACAATTT	GGCGACAATTTATG		G	G	C	G	A	C	A	A	T	T	T	A	T	G
2R	-	2R-16521070	FBti0076121	EPgy2	ACACCCAC	GCGACACCCACCTA		G	C	G	A	C	A	C	C	C	A	C	C	T	A
2R	-	2R-16558100	FBti0040233	EPgy2	ACAAAAGC	ATTACAAAAGCAGT		A	T	T	A	C	A	A	A	A	G	C	A	G	T
2R	-	2R-16720505	FBti0039972	EPgy2	ACATTTTA	ATAACATTTTAAAA		A	T	A	A	C	A	T	T	T	T	A	A	A	A
2R	-	2R-16884203	FBti0024880	EPgy2	GATCAATC	AAAGATCAATCAAA		A	A	A	G	A	T	C	A	A	T	C	A	A	A
2R	-	2R-16976092	FBti0075973	EPgy2	GTCTCAAC	CGTGTCTCAACACT		C	G	T	G	T	C	T	C	A	A	C	A	C	T
2R	-	2R-17052904	FBti0038086	EPgy2	GTCCAGGC	AAGGTCCAGGCTTC		A	A	G	G	T	C	C	A	G	G	C	T	T	C
2R	-	2R-17056687	FBti0027176	EPgy2	GGCTGGGC	TATGGCTGGGCAAT		T	A	T	G	G	C	T	G	G	G	C	A	A	T
2R	-	2R-17058158	FBti0039250	EPgy2	GTTGTGCC	TTCGTTGTGCCAGT		T	T	C	G	T	T	G	T	G	C	C	A	G	T
2R	-	2R-17065305	FBti0027146	EPgy2	GCGTATAC	TTGGCGTATACGTA		T	T	G	G	C	G	T	A	T	A	C	G	T	A
2R	-	2R-17066615	FBti0038087	EPgy2	GGCTGCAG	TCTGGCTGCAGAGG		T	C	T	G	G	C	T	G	C	A	G	A	G	G
2R	-	2R-17070746	FBti0057968	EPgy2	GATTGTAT	GTTGATTGTATACA		G	T	T	G	A	T	T	G	T	A	T	A	C	A
2R	-	2R-17170297	FBti0057740	EPgy2	GTCCGATA	TTAGTCCGATATTT		T	T	A	G	T	C	C	G	A	T	A	T	T	T
2R	-	2R-17210797	FBti0025180	EPgy2	CTTGCGTT	TTGCTTGCGTTGGT		T	T	G	C	T	T	G	C	G	T	T	G	G	T
2R	-	2R-17368465	FBti0039707	EPgy2	GACATTAC	AAAGACATTACAAT		A	A	A	G	A	C	A	T	T	A	C	A	A	T
2R	-	2R-17389229	FBti0075914	EPgy2	ATCCCAGC	AGCATCCCAGCTTA		A	G	C	A	T	C	C	C	A	G	C	T	T	A
2R	-	2R-17410242	FBti0057738	EPgy2	TCTACGCA	GTGTCTACGCAAAA		G	T	G	T	C	T	A	C	G	C	A	A	A	A
2R	-	2R-17431938	FBti0076098	EPgy2	GCACCGGC	GGAGCACCGGCCAA		G	G	A	G	C	A	C	C	G	G	C	C	A	A
2R	-	2R-17500799	FBti0057779	EPgy2	CACTTGAC	ACACACTTGACAAT		A	C	A	C	A	C	T	T	G	A	C	A	A	T
2R	-	2R-17504306	FBti0033363	EPgy2	GTCTCGCT	TCAGTCTCGCTTAC		T	C	A	G	T	C	T	C	G	C	T	T	A	C
2R	-	2R-17522223	FBti0075840	EPgy2	CTCTACAG	TCACTCTACAGTCT		T	C	A	C	T	C	T	A	C	A	G	T	C	T
2R	-	2R-17545867	FBti0039306	EPgy2	GAATAACG	AAGGAATAACGCAT		A	A	G	G	A	A	T	A	A	C	G	C	A	T
2R	-	2R-17593535	FBti0076125	EPgy2	CTCTAGCC	AGGCTCTAGCCCTG		A	G	G	C	T	C	T	A	G	C	C	C	T	G
2R	-	2R-17599126	FBti0075954	EPgy2	GGCTGGGC	TTTGGCTGGGCACT		T	T	T	G	G	C	T	G	G	G	C	A	C	T
2R	-	2R-17599566	FBti0027304	EPgy2	GGTGAGGC	CTCGGTGAGGCCAT		C	T	C	G	G	T	G	A	G	G	C	C	A	T
2R	-	2R-17769109	FBti0076106	EPgy2	GTACGTAT	ATTGTACGTATATT		A	T	T	G	T	A	C	G	T	A	T	A	T	T
2R	-	2R-17856685	FBti0057610	EPgy2	GAGTCAAA	GAAGAGTCAAACTA		G	A	A	G	A	G	T	C	A	A	A	C	T	A
2R	-	2R-17948670	FBti0027078	EPgy2	GTTCATCG	TGAGTTCATCGTTT		T	G	A	G	T	T	C	A	T	C	G	T	T	T
2R	-	2R-17960836	FBti0024846	EPgy2	GCAGGGAC	TAAGCAGGGACTGT		T	A	A	G	C	A	G	G	G	A	C	T	G	T
2R	-	2R-17963486	FBti0027173	EPgy2	GTCTCACC	TCGGTCTCACCAAA		T	C	G	G	T	C	T	C	A	C	C	A	A	A
2R	-	2R-18007236	FBti0025249	EPgy2	GGCCGACT	ATCGGCCGACTTGT		A	T	C	G	G	C	C	G	A	C	T	T	G	T
2R	-	2R-18073583	FBti0100359	EPgy2	GTTGTAGC	TTAGTTGTAGCTAA		T	T	A	G	T	T	G	T	A	G	C	T	A	A
2R	-	2R-18081364	FBti0038973	EPgy2	GCCCTACC	AGCGCCCTACCTAT		A	G	C	G	C	C	C	T	A	C	C	T	A	T
2R	-	2R-18219534	FBti0038913	EPgy2	CCTGAAGC	GTACCTGAAGCTTG		G	T	A	C	C	T	G	A	A	G	C	T	T	G
2R	-	2R-18219581	FBti0038771	EPgy2	GTCCTTGC	AAGGTCCTTGCCTA		A	A	G	G	T	C	C	T	T	G	C	C	T	A
2R	-	2R-18298947	FBti0024920	EPgy2	GCTTGACC	TGTGCTTGACCGTT		T	G	T	G	C	T	T	G	A	C	C	G	T	T
2R	-	2R-18527654	FBti0024133	EPgy2	CCCCAGCG	TAACCCCAGCGCCA		T	A	A	C	C	C	C	A	G	C	G	C	C	A
2R	-	2R-18544452	FBti0075949	EPgy2	TTGTTGAC	TTGTTGTTGACAAA		T	T	G	T	T	G	T	T	G	A	C	A	A	A
2R	-	2R-18549415	FBti0039445	EPgy2	CTCCACAG	CTACTCCACAGCAA		C	T	A	C	T	C	C	A	C	A	G	C	A	A
2R	-	2R-18588461	FBti0040285	EPgy2	ATCTGCAC	TATATCTGCACGGA		T	A	T	A	T	C	T	G	C	A	C	G	G	A
2R	-	2R-18608247	FBti0040286	EPgy2	GGTTAAAC	AAGGGTTAAACTGA		A	A	G	G	G	T	T	A	A	A	C	T	G	A
2R	-	2R-18693839	FBti0039882	EPgy2	TGCTACCC	ATGTGCTACCCAAC		A	T	G	T	G	C	T	A	C	C	C	A	A	C
2R	-	2R-18728210	FBti0038758	EPgy2	AGCAGGAC	TTCAGCAGGACCCT		T	T	C	A	G	C	A	G	G	A	C	C	C	T
2R	-	2R-18799176	FBti0025169	EPgy2	GTTTGACA	ACTGTTTGACAGGT		A	C	T	G	T	T	T	G	A	C	A	G	G	T
2R	-	2R-18824185	FBti0039974	EPgy2	GACATATC	AACGACATATCCAT		A	A	C	G	A	C	A	T	A	T	C	C	A	T
2R	-	2R-18828461	FBti0075955	EPgy2	ATATAAAC	AATATATAAACAAT		A	A	T	A	T	A	T	A	A	A	C	A	A	T
2R	-	2R-18886237	FBti0039766	EPgy2	GACCGAAC	ATTGACCGAACTCT		A	T	T	G	A	C	C	G	A	A	C	T	C	T
2R	-	2R-18955352	FBti0075898	EPgy2	GTCTCAGT	AAAGTCTCAGTCAA		A	A	A	G	T	C	T	C	A	G	T	C	A	A
2R	-	2R-19126649	FBti0057850	EPgy2	GACTGGAA	TTGGACTGGAATTT		T	T	G	G	A	C	T	G	G	A	A	T	T	T
2R	-	2R-19242704	FBti0038878	EPgy2	GTCGGGGC	TTGGTCGGGGCTCC		T	T	G	G	T	C	G	G	G	G	C	T	C	C
2R	-	2R-19274032	FBti0027493	EPgy2	GTCCCAAC	GGAGTCCCAACAAA		G	G	A	G	T	C	C	C	A	A	C	A	A	A
2R	-	2R-19431564	FBti0057665	EPgy2	GTTACGGC	ACTGTTACGGCAAG		A	C	T	G	T	T	A	C	G	G	C	A	A	G
2R	-	2R-19435493	FBti0039866	EPgy2	CGTGAAAC	TTTCGTGAAACTTA		T	T	T	C	G	T	G	A	A	A	C	T	T	A
2R	-	2R-19452388	FBti0033353	EPgy2	GTGGTGGT	ATGGTGGTGGTCAG		A	T	G	G	T	G	G	T	G	G	T	C	A	G
2R	-	2R-19546654	FBti0038993	EPgy2	GTCTGATA	TAAGTCTGATAAGC		T	A	A	G	T	C	T	G	A	T	A	A	G	C
2R	-	2R-19554489	FBti0057908	EPgy2	GGCCATGG	ATAGGCCATGGGAT		A	T	A	G	G	C	C	A	T	G	G	G	A	T
2R	-	2R-19589843	FBti0039373	EPgy2	TCTTAGGT	AAATCTTAGGTCAT		A	A	A	T	C	T	T	A	G	G	T	C	A	T
2R	-	2R-19597279	FBti0057824	EPgy2	GTCGCCGA	CGCGTCGCCGATAA		C	G	C	G	T	C	G	C	C	G	A	T	A	A
2R	-	2R-19634363	FBti0039479	EPgy2	GTCTCGAC	TTGGTCTCGACTCT		T	T	G	G	T	C	T	C	G	A	C	T	C	T
2R	-	2R-19730797	FBti0038836	EPgy2	CGACTAAT	CTCCGACTAATCGA		C	T	C	C	G	A	C	T	A	A	T	C	G	A
2R	-	2R-19746335	FBti0040009	EPgy2	GTCCATAC	ATTGTCCATACCGC		A	T	T	G	T	C	C	A	T	A	C	C	G	C
2R	-	2R-19750101	FBti0057772	EPgy2	ATCCAGAG	AAAATCCAGAGAAA		A	A	A	A	T	C	C	A	G	A	G	A	A	A
2R	-	2R-19752987	FBti0057672	EPgy2	GTCAAGAG	ATAGTCAAGAGTTT		A	T	A	G	T	C	A	A	G	A	G	T	T	T
2R	-	2R-19782192	FBti0039137	EPgy2	GACAAGAT	ATGGACAAGATGAT		A	T	G	G	A	C	A	A	G	A	T	G	A	T
2R	-	2R-19794567	FBti0039767	EPgy2	GGCCGAAT	AATGGCCGAATTAT		A	A	T	G	G	C	C	G	A	A	T	T	A	T
2R	-	2R-19812398	FBti0039524	EPgy2	TGTGGGCT	GAATGTGGGCTTAA		G	A	A	T	G	T	G	G	G	C	T	T	A	A
2R	-	2R-19812631	FBti0040129	EPgy2	GCTCGGTA	ACCGCTCGGTACAT		A	C	C	G	C	T	C	G	G	T	A	C	A	T
2R	-	2R-19857601	FBti0038830	EPgy2	TATGTAGT	AAGTATGTAGTTGG		A	A	G	T	A	T	G	T	A	G	T	T	G	G
2R	-	2R-19921445	FBti0039279	EPgy2	TGGACTAC	TAGTGGACTACCGG		T	A	G	T	G	G	A	C	T	A	C	C	G	G
2R	-	2R-19934315	FBti0057632	EPgy2	CTACAGCA	CTACTACAGCAGCA		C	T	A	C	T	A	C	A	G	C	A	G	C	A
2R	-	2R-19950592	FBti0025292	EPgy2	GACTGGGC	AGAGACTGGGCTCA		A	G	A	G	A	C	T	G	G	G	C	T	C	A
2R	-	2R-19956513	FBti0027121	EPgy2	TTGGGAGA	TTGTTGGGAGATTT		T	T	G	T	T	G	G	G	A	G	A	T	T	T
2R	-	2R-19986115	FBti0039666	EPgy2	CCGTAAAC	TTACCGTAAACCGC		T	T	A	C	C	G	T	A	A	A	C	C	G	C
2R	-	2R-20232086	FBti0076132	EPgy2	GTGACAGC	AAAGTGACAGCCAA		A	A	A	G	T	G	A	C	A	G	C	C	A	A
2R	-	2R-20311288	FBti0038815	EPgy2	CTTTGGCC	AGACTTTGGCCCAA		A	G	A	C	T	T	T	G	G	C	C	C	A	A
2R	-	2R-20494766	FBti0039130	EPgy2	GCACCGGT	CAGGCACCGGTGCC		C	A	G	G	C	A	C	C	G	G	T	G	C	C
2R	-	2R-20498961	FBti0100376	EPgy2	CTCGCTTT	TGGCTCGCTTTTTA		T	G	G	C	T	C	G	C	T	T	T	T	T	A
2R	-	2R-20556933	FBti0072056	EPgy2	TCTGTCGT	ACGTCTGTCGTTAC		A	C	G	T	C	T	G	T	C	G	T	T	A	C
2R	-	2R-20624292	FBti0039780	EPgy2	GGTGCGAC	TTCGGTGCGACCGG		T	T	C	G	G	T	G	C	G	A	C	C	G	G
2R	-	2R-20668490	FBti0033136	EPgy2	CACTGGGT	TTCCACTGGGTTTC		T	T	C	C	A	C	T	G	G	G	T	T	T	C
2R	-	2R-20762421	FBti0027378	EPgy2	CTTTACAG	ATACTTTACAGTCC		A	T	A	C	T	T	T	A	C	A	G	T	C	C
2R	-	2R-20769137	FBti0076111	EPgy2	GACTAGTG	TCAGACTAGTGAGT		T	C	A	G	A	C	T	A	G	T	G	A	G	T
2R	-	2R-20791433	FBti0025303	EPgy2	CTCCAGGC	CAACTCCAGGCAGT		C	A	A	C	T	C	C	A	G	G	C	A	G	T
2R	-	2R-20836169	FBti0057619	EPgy2	CCCTAATC	ACCCCCTAATCAGA		A	C	C	C	C	C	T	A	A	T	C	A	G	A
2RHet	-	2RHet-743954	FBti0075439	EPgy2	GGGGAAGT	TACGGGGAAGTGAA		T	A	C	G	G	G	G	A	A	G	T	G	A	A
3L	-	3L-184380	FBti0039546	EPgy2	GTCGCCAC	GGAGTCGCCACCCC		G	G	A	G	T	C	G	C	C	A	C	C	C	C
3L	-	3L-205818	FBti0076019	EPgy2	GTTCCAGG	TCGGTTCCAGGCTC		T	C	G	G	T	T	C	C	A	G	G	C	T	C
3L	-	3L-225048	FBti0024112	EPgy2	TCCGAATA	TGGTCCGAATAGAC		T	G	G	T	C	C	G	A	A	T	A	G	A	C
3L	-	3L-258242	FBti0027381	EPgy2	GACCAGCT	CTCGACCAGCTGTT		C	T	C	G	A	C	C	A	G	C	T	G	T	T
3L	-	3L-264374	FBti0038779	EPgy2	CGCTGTAT	ATACGCTGTATATA		A	T	A	C	G	C	T	G	T	A	T	A	T	A
3L	-	3L-271600	FBti0027294	EPgy2	AGCATGAC	TTCAGCATGACTTG		T	T	C	A	G	C	A	T	G	A	C	T	T	G
3L	-	3L-319853	FBti0039236	EPgy2	GGTTGTAC	TTGGGTTGTACTTT		T	T	G	G	G	T	T	G	T	A	C	T	T	T
3L	-	3L-347259	FBti0057893	EPgy2	GTCTAGGT	GGTGTCTAGGTCTA		G	G	T	G	T	C	T	A	G	G	T	C	T	A
3L	-	3L-361567	FBti0038733	EPgy2	GTGGTCTT	CTCGTGGTCTTGGT		C	T	C	G	T	G	G	T	C	T	T	G	G	T
3L	-	3L-365683	FBti0057737	EPgy2	CTCCAGTC	AAGCTCCAGTCAAA		A	A	G	C	T	C	C	A	G	T	C	A	A	A
3L	-	3L-490255	FBti0057750	EPgy2	ACTAATAG	ATCACTAATAGCAA		A	T	C	A	C	T	A	A	T	A	G	C	A	A
3L	-	3L-543336	FBti0057731	EPgy2	GGACAACG	AGGGGACAACGTAA		A	G	G	G	G	A	C	A	A	C	G	T	A	A
3L	-	3L-593210	FBti0057876	EPgy2	TTTAGAAT	TTTTTTAGAATGCA		T	T	T	T	T	T	A	G	A	A	T	G	C	A
3L	-	3L-615989	FBti0033125	EPgy2	TGTTTACG	ATATGTTTACGACT		A	T	A	T	G	T	T	T	A	C	G	A	C	T
3L	-	3L-648760	FBti0076049	EPgy2	TTTTGCTC	CGATTTTGCTCCAC		C	G	A	T	T	T	T	G	C	T	C	C	A	C
3L	-	3L-690107	FBti0039384	EPgy2	AATCCACC	CTTAATCCACCCAT		C	T	T	A	A	T	C	C	A	C	C	C	A	T
3L	-	3L-708235	FBti0040108	EPgy2	ATCTAGCC	TTGATCTAGCCAGA		T	T	G	A	T	C	T	A	G	C	C	A	G	A
3L	-	3L-710303	FBti0040104	EPgy2	TATTTCAT	GCATATTTCATTTC		G	C	A	T	A	T	T	T	C	A	T	T	T	C
3L	-	3L-769128	FBti0039344	EPgy2	GTTGGAAC	AGGGTTGGAACCTT		A	G	G	G	T	T	G	G	A	A	C	C	T	T
3L	-	3L-823400	FBti0027132	EPgy2	CTGTTGCC	AACCTGTTGCCGCA		A	A	C	C	T	G	T	T	G	C	C	G	C	A
3L	-	3L-883111	FBti0039465	EPgy2	GGCAAAAC	TTCGGCAAAACAAA		T	T	C	G	G	C	A	A	A	A	C	A	A	A
3L	-	3L-1246871	FBti0038866	EPgy2	TCATGTGA	CTGTCATGTGACTG		C	T	G	T	C	A	T	G	T	G	A	C	T	G
3L	-	3L-1302587	FBti0025307	EPgy2	ACCTAGCC	AACACCTAGCCGGT		A	A	C	A	C	C	T	A	G	C	C	G	G	T
3L	-	3L-1331790	FBti0057785	EPgy2	CTATGACT	TACCTATGACTTAG		T	A	C	C	T	A	T	G	A	C	T	T	A	G
3L	-	3L-1478944	FBti0038743	EPgy2	TCCGTACG	GTGTCCGTACGATT		G	T	G	T	C	C	G	T	A	C	G	A	T	T
3L	-	3L-1490970	FBti0039332	EPgy2	GCCTAGAG	CCTGCCTAGAGTTG		C	C	T	G	C	C	T	A	G	A	G	T	T	G
3L	-	3L-1502563	FBti0039501	EPgy2	GCGAAAGC	TGGGCGAAAGCGAA		T	G	G	G	C	G	A	A	A	G	C	G	A	A
3L	-	3L-1502749	FBti0024122	EPgy2	GCTGGATT	GCAGCTGGATTGTA		G	C	A	G	C	T	G	G	A	T	T	G	T	A
3L	-	3L-1516746	FBti0025179	EPgy2	CGTCAACC	GTGCGTCAACCGGT		G	T	G	C	G	T	C	A	A	C	C	G	G	T
3L	-	3L-1582010	FBti0075860	EPgy2	CTCTGTGC	TAGCTCTGTGCCAT		T	A	G	C	T	C	T	G	T	G	C	C	A	T
3L	-	3L-1592704	FBti0027334	EPgy2	GCTTGAAT	TTGGCTTGAATACA		T	T	G	G	C	T	T	G	A	A	T	A	C	A
3L	-	3L-1602626	FBti0024923	EPgy2	TCATCGCC	TCGTCATCGCCATG		T	C	G	T	C	A	T	C	G	C	C	A	T	G
3L	-	3L-1645482	FBti0040235	EPgy2	CCCCAGTC	TTTCCCCAGTCCTT		T	T	T	C	C	C	C	A	G	T	C	C	T	T
3L	-	3L-1653001	FBti0039238	EPgy2	GCGCAGCA	AAAGCGCAGCATTC		A	A	A	G	C	G	C	A	G	C	A	T	T	C
3L	-	3L-1880751	FBti0075921	EPgy2	TCCTGATG	TGGTCCTGATGTCC		T	G	G	T	C	C	T	G	A	T	G	T	C	C
3L	-	3L-1884961	FBti0040190	EPgy2	GTTGAGGT	TAGGTTGAGGTAGC		T	A	G	G	T	T	G	A	G	G	T	A	G	C
3L	-	3L-2115676	FBti0075849	EPgy2	GGCGGGAT	ATGGGCGGGATATA		A	T	G	G	G	C	G	G	G	A	T	A	T	A
3L	-	3L-2248547	FBti0057601	EPgy2	GCACACAC	AAAGCACACACTGA		A	A	A	G	C	A	C	A	C	A	C	T	G	A
3L	-	3L-2270438	FBti0027077	EPgy2	CCCTATAC	AAACCCTATACTAT		A	A	A	C	C	C	T	A	T	A	C	T	A	T
3L	-	3L-2483187	FBti0039369	EPgy2	GTTCCTCA	AGGGTTCCTCAGAT		A	G	G	G	T	T	C	C	T	C	A	G	A	T
3L	-	3L-2586526	FBti0039748	EPgy2	CGACAACC	GAACGACAACCCAT		G	A	A	C	G	A	C	A	A	C	C	C	A	T
3L	-	3L-3038211	FBti0027221	EPgy2	ACAAAGCT	TCGACAAAGCTCTC		T	C	G	A	C	A	A	A	G	C	T	C	T	C
3L	-	3L-3055140	FBti0038730	EPgy2	ATGTGAGC	TTTATGTGAGCTTT		T	T	T	A	T	G	T	G	A	G	C	T	T	T
3L	-	3L-3070843	FBti0057808	EPgy2	TGTAATGC	ACATGTAATGCTTA		A	C	A	T	G	T	A	A	T	G	C	T	T	A
3L	-	3L-3145538	FBti0075926	EPgy2	GTCTGGTC	CTGGTCTGGTCGGT		C	T	G	G	T	C	T	G	G	T	C	G	G	T
3L	-	3L-3148340	FBti0076154	EPgy2	GGTCAGCC	TGGGGTCAGCCTAA		T	G	G	G	G	T	C	A	G	C	C	T	A	A
3L	-	3L-3159551	FBti0039148	EPgy2	GCCTAGGC	TAGGCCTAGGCCAT		T	A	G	G	C	C	T	A	G	G	C	C	A	T
3L	-	3L-3197200	FBti0076008	EPgy2	GGGACACG	GAGGGGACACGGTG		G	A	G	G	G	G	A	C	A	C	G	G	T	G
3L	-	3L-3198344	FBti0039237	EPgy2	CGGCGAAA	GGTCGGCGAAACAT		G	G	T	C	G	G	C	G	A	A	A	C	A	T
3L	-	3L-3199309	FBti0033206	EPgy2	CTCGGGCC	TGGCTCGGGCCCTC		T	G	G	C	T	C	G	G	G	C	C	C	T	C
3L	-	3L-3218913	FBti0027233	EPgy2	AACTAAAT	TAAAACTAAATAAT		T	A	A	A	A	C	T	A	A	A	T	A	A	T
3L	-	3L-3223543	FBti0025252	EPgy2	GGCATGCG	TCGGGCATGCGCGT		T	C	G	G	G	C	A	T	G	C	G	C	G	T
3L	-	3L-3235767	FBti0039419	EPgy2	CTCCGAAG	TTTCTCCGAAGACT		T	T	T	C	T	C	C	G	A	A	G	A	C	T
3L	-	3L-3398346	FBti0038847	EPgy2	AGCTCGCC	GCTAGCTCGCCTTC		G	C	T	A	G	C	T	C	G	C	C	T	T	C
3L	-	3L-3418097	FBti0057637	EPgy2	AAAAGAGA	AAAAAAAGAGAAAA		A	A	A	A	A	A	A	G	A	G	A	A	A	A
3L	-	3L-3460546	FBti0039653	EPgy2	CGTCAAAG	AGGCGTCAAAGTCA		A	G	G	C	G	T	C	A	A	A	G	T	C	A
3L	-	3L-3472001	FBti0076093	EPgy2	GTACCGAT	ATTGTACCGATTAT		A	T	T	G	T	A	C	C	G	A	T	T	A	T
3L	-	3L-3720763	FBti0057818	EPgy2	GCTAGGAC	TGGGCTAGGACTCA		T	G	G	G	C	T	A	G	G	A	C	T	C	A
3L	-	3L-3902949	FBti0039434	EPgy2	GTGTGGTG	AGAGTGTGGTGAGC		A	G	A	G	T	G	T	G	G	T	G	A	G	C
3L	-	3L-4017817	FBti0057910	EPgy2	AGCTGATC	CACAGCTGATCGAT		C	A	C	A	G	C	T	G	A	T	C	G	A	T
3L	-	3L-4021509	FBti0057805	EPgy2	GTTGGGGG	TCGGTTGGGGGTTG		T	C	G	G	T	T	G	G	G	G	G	T	T	G
3L	-	3L-4102701	FBti0040168	EPgy2	GCTGCGAT	AGTGCTGCGATTTT		A	G	T	G	C	T	G	C	G	A	T	T	T	T
3L	-	3L-4232620	FBti0027049	EPgy2	CTCGCATC	GCACTCGCATCCAA		G	C	A	C	T	C	G	C	A	T	C	C	A	A
3L	-	3L-4318126	FBti0040217	EPgy2	GCTTATTT	AGTGCTTATTTTAA		A	G	T	G	C	T	T	A	T	T	T	T	A	A
3L	-	3L-4625471	FBti0057712	EPgy2	CCTCAGAC	TTACCTCAGACGGA		T	T	A	C	C	T	C	A	G	A	C	G	G	A
3L	-	3L-5180187	FBti0039199	EPgy2	GCGGGCAC	ATGGCGGGCACTCA		A	T	G	G	C	G	G	G	C	A	C	T	C	A
3L	-	3L-5348442	FBti0040018	EPgy2	TGAACTAA	AGCTGAACTAAACT		A	G	C	T	G	A	A	C	T	A	A	A	C	T
3L	-	3L-5745301	FBti0027313	EPgy2	GGTAGGGC	AAAGGTAGGGCGTT		A	A	A	G	G	T	A	G	G	G	C	G	T	T
3L	-	3L-5758660	FBti0039475	EPgy2	GGCCAGCC	CTCGGCCAGCCAAT		C	T	C	G	G	C	C	A	G	C	C	A	A	T
3L	-	3L-5805678	FBti0075997	EPgy2	ATTCCGAG	GCGATTCCGAGCAT		G	C	G	A	T	T	C	C	G	A	G	C	A	T
3L	-	3L-5895597	FBti0038839	EPgy2	CTTCGCAC	AAACTTCGCACTGG		A	A	A	C	T	T	C	G	C	A	C	T	G	G
3L	-	3L-5925631	FBti0039313	EPgy2	GCTGGCAG	ACGGCTGGCAGTGT		A	C	G	G	C	T	G	G	C	A	G	T	G	T
3L	-	3L-6048257	FBti0039466	EPgy2	TGCCTTAT	GGTTGCCTTATAAA		G	G	T	T	G	C	C	T	T	A	T	A	A	A
3L	-	3L-6174897	FBti0033378	EPgy2	AGCGGAAG	AAAAGCGGAAGCTG		A	A	A	A	G	C	G	G	A	A	G	C	T	G
3L	-	3L-6211159	FBti0040044	EPgy2	GTTGCGAC	TCCGTTGCGACCAA		T	C	C	G	T	T	G	C	G	A	C	C	A	A
3L	-	3L-6211808	FBti0024081	EPgy2	CCCAAACG	ATCCCCAAACGAAA		A	T	C	C	C	C	A	A	A	C	G	A	A	A
3L	-	3L-6575856	FBti0039110	EPgy2	AAATGGTG	TTCAAATGGTGACG		T	T	C	A	A	A	T	G	G	T	G	A	C	G
3L	-	3L-6740387	FBti0100349	EPgy2	GGCAAGCC	TTTGGCAAGCCTGT		T	T	T	G	G	C	A	A	G	C	C	T	G	T
3L	-	3L-6957842	FBti0039928	EPgy2	GTCCGAGT	TAGGTCCGAGTTTG		T	A	G	G	T	C	C	G	A	G	T	T	T	G
3L	-	3L-6969321	FBti0039022	EPgy2	AACTAACA	CATAACTAACAAAG		C	A	T	A	A	C	T	A	A	C	A	A	A	G
3L	-	3L-7150587	FBti0057715	EPgy2	GGCCAACT	TTTGGCCAACTGGA		T	T	T	G	G	C	C	A	A	C	T	G	G	A
3L	-	3L-7237060	FBti0057988	EPgy2	GGCACAGA	TGAGGCACAGACGA		T	G	A	G	G	C	A	C	A	G	A	C	G	A
3L	-	3L-7283744	FBti0038705	EPgy2	GTTTGTGC	AAAGTTTGTGCAAA		A	A	A	G	T	T	T	G	T	G	C	A	A	A
3L	-	3L-7354118	FBti0027340	EPgy2	GTTGTCAT	ACTGTTGTCATGTT		A	C	T	G	T	T	G	T	C	A	T	G	T	T
3L	-	3L-7384803	FBti0025196	EPgy2	ACATGCTC	TCGACATGCTCACA		T	C	G	A	C	A	T	G	C	T	C	A	C	A
3L	-	3L-7428416	FBti0039795	EPgy2	CTGTGGCA	ATACTGTGGCATAT		A	T	A	C	T	G	T	G	G	C	A	T	A	T
3L	-	3L-7641276	FBti0038684	EPgy2	TTCCGCCC	TAATTCCGCCCCAA		T	A	A	T	T	C	C	G	C	C	C	C	A	A
3L	-	3L-7647171	FBti0038835	EPgy2	GGTGGGAC	ACAGGTGGGACGTG		A	C	A	G	G	T	G	G	G	A	C	G	T	G
3L	-	3L-7774800	FBti0039017	EPgy2	CACCCCAC	ACGCACCCCACCCA		A	C	G	C	A	C	C	C	C	A	C	C	C	A
3L	-	3L-7860279	FBti0057933	EPgy2	GCTCAGTG	TTGGCTCAGTGTGA		T	T	G	G	C	T	C	A	G	T	G	T	G	A
3L	-	3L-7908519	FBti0027236	EPgy2	ATCAGAGC	CTAATCAGAGCGTC		C	T	A	A	T	C	A	G	A	G	C	G	T	C
3L	-	3L-7969207	FBti0025214	EPgy2	AGCCAAAA	ACTAGCCAAAAGCG		A	C	T	A	G	C	C	A	A	A	A	G	C	G
3L	-	3L-7969469	FBti0038880	EPgy2	CTCTGGGC	CGGCTCTGGGCCTT		C	G	G	C	T	C	T	G	G	G	C	C	T	T
3L	-	3L-8070466	FBti0027307	EPgy2	CCGCAGGT	TTACCGCAGGTGTT		T	T	A	C	C	G	C	A	G	G	T	G	T	T
3L	-	3L-8085021	FBti0057989	EPgy2	GGCCAAAC	ATGGGCCAAACGAA		A	T	G	G	G	C	C	A	A	A	C	G	A	A
3L	-	3L-8151982	FBti0057648	EPgy2	TATCGGAC	GAATATCGGACTTT		G	A	A	T	A	T	C	G	G	A	C	T	T	T
3L	-	3L-8190931	FBti0076096	EPgy2	GTTCATAT	TTCGTTCATATGGA		T	T	C	G	T	T	C	A	T	A	T	G	G	A
3L	-	3L-8292538	FBti0076030	EPgy2	GTTGGGGC	CTGGTTGGGGCGCA		C	T	G	G	T	T	G	G	G	G	C	G	C	A
3L	-	3L-8339891	FBti0038814	EPgy2	GTATGTGG	TTTGTATGTGGGTG		T	T	T	G	T	A	T	G	T	G	G	G	T	G
3L	-	3L-8354021	FBti0040112	EPgy2	TGTGGGCC	TCCTGTGGGCCCCA		T	C	C	T	G	T	G	G	G	C	C	C	C	A
3L	-	3L-8414478	FBti0027354	EPgy2	AATGCGGG	AGGAATGCGGGCTT		A	G	G	A	A	T	G	C	G	G	G	C	T	T
3L	-	3L-8435478	FBti0039023	EPgy2	GTCTCAAT	ATTGTCTCAATTGA		A	T	T	G	T	C	T	C	A	A	T	T	G	A
3L	-	3L-8516593	FBti0057937	EPgy2	GTCACAAC	ACGGTCACAACTTT		A	C	G	G	T	C	A	C	A	A	C	T	T	T
3L	-	3L-8583067	FBti0057658	EPgy2	AGCGGAGC	TGCAGCGGAGCAGT		T	G	C	A	G	C	G	G	A	G	C	A	G	T
3L	-	3L-8594091	FBti0033371	EPgy2	GCGCGAAG	AGAGCGCGAAGAAG		A	G	A	G	C	G	C	G	A	A	G	A	A	G
3L	-	3L-8775588	FBti0038963	EPgy2	ACTACACG	TCTACTACACGCAT		T	C	T	A	C	T	A	C	A	C	G	C	A	T
3L	-	3L-8820584	FBti0038893	EPgy2	GAGTGGAC	TTAGAGTGGACCTT		T	T	A	G	A	G	T	G	G	A	C	C	T	T
3L	-	3L-8905772	FBti0033152	EPgy2	AGCCAGGC	TGCAGCCAGGCATT		T	G	C	A	G	C	C	A	G	G	C	A	T	T
3L	-	3L-8979870	FBti0033248	EPgy2	GTCTCACT	ATTGTCTCACTTAC		A	T	T	G	T	C	T	C	A	C	T	T	A	C
3L	-	3L-8991010	FBti0100352	EPgy2	GCCTAAAG	ACGGCCTAAAGCCT		A	C	G	G	C	C	T	A	A	A	G	C	C	T
3L	-	3L-8991166	FBti0077800	EPgy2	ATCTGGGC	ATGATCTGGGCTAC		A	T	G	A	T	C	T	G	G	G	C	T	A	C
3L	-	3L-9120851	FBti0038942	EPgy2	CCCCCACT	TCACCCCCACTCTC		T	C	A	C	C	C	C	C	A	C	T	C	T	C
3L	-	3L-9130638	FBti0027068	EPgy2	CCCCACCA	GCTCCCCACCACCA		G	C	T	C	C	C	C	A	C	C	A	C	C	A
3L	-	3L-9342701	FBti0038897	EPgy2	GCACGCTT	ATGGCACGCTTTTT		A	T	G	G	C	A	C	G	C	T	T	T	T	T
3L	-	3L-9419835	FBti0039737	EPgy2	CAACAGAG	AAACAACAGAGAAT		A	A	A	C	A	A	C	A	G	A	G	A	A	T
3L	-	3L-9467633	FBti0027398	EPgy2	CCCGAGGG	AAGCCCGAGGGAGG		A	A	G	C	C	C	G	A	G	G	G	A	G	G
3L	-	3L-9502472	FBti0039213	EPgy2	GTGTGGAA	AAGGTGTGGAAGTT		A	A	G	G	T	G	T	G	G	A	A	G	T	T
3L	-	3L-9540286	FBti0076018	EPgy2	AACCAAGG	AAAAACCAAGGTAT		A	A	A	A	A	C	C	A	A	G	G	T	A	T
3L	-	3L-9691587	FBti0025293	EPgy2	TCGTAGAC	TACTCGTAGACTAA		T	A	C	T	C	G	T	A	G	A	C	T	A	A
3L	-	3L-9706877	FBti0038794	EPgy2	GGCAGGGG	TAGGGCAGGGGTAT		T	A	G	G	G	C	A	G	G	G	G	T	A	T
3L	-	3L-9707404	FBti0033240	EPgy2	TACTGCTG	TTGTACTGCTGTTA		T	T	G	T	A	C	T	G	C	T	G	T	T	A
3L	-	3L-9707777	FBti0027440	EPgy2	GACGAAAC	AACGACGAAACCAA		A	A	C	G	A	C	G	A	A	A	C	C	A	A
3L	-	3L-9723106	FBti0039154	EPgy2	CTTAAAAC	TTACTTAAAACTTT		T	T	A	C	T	T	A	A	A	A	C	T	T	T
3L	-	3L-9847055	FBti0024058	EPgy2	GAAACTTT	GCAGAAACTTTGGA		G	C	A	G	A	A	A	C	T	T	T	G	G	A
3L	-	3L-9882209	FBti0038789	EPgy2	GCACACAC	TGAGCACACACTTT		T	G	A	G	C	A	C	A	C	A	C	T	T	T
3L	-	3L-9887877	FBti0075882	EPgy2	GTCTGGGC	ATCGTCTGGGCCAT		A	T	C	G	T	C	T	G	G	G	C	C	A	T
3L	-	3L-9892133	FBti0058036	EPgy2	GAGCCAGA	AAAGAGCCAGAGAG		A	A	A	G	A	G	C	C	A	G	A	G	A	G
3L	-	3L-9961582	FBti0057705	EPgy2	AACGCAAA	GAGAACGCAAACGG		G	A	G	A	A	C	G	C	A	A	A	C	G	G
3L	-	3L-10217770	FBti0038766	EPgy2	AGCCAGTC	TTCAGCCAGTCGTT		T	T	C	A	G	C	C	A	G	T	C	G	T	T
3L	-	3L-10351099	FBti0039162	EPgy2	CCTCAAGG	ATTCCTCAAGGCCT		A	T	T	C	C	T	C	A	A	G	G	C	C	T
3L	-	3L-10494004	FBti0027171	EPgy2	AATACAGA	TTTAATACAGAGTA		T	T	T	A	A	T	A	C	A	G	A	G	T	A
3L	-	3L-10850993	FBti0077808	EPgy2	GTTGAGAG	TGAGTTGAGAGCTT		T	G	A	G	T	T	G	A	G	A	G	C	T	T
3L	-	3L-11067477	FBti0039930	EPgy2	CACCAGCC	ATGCACCAGCCGAG		A	T	G	C	A	C	C	A	G	C	C	G	A	G
3L	-	3L-11076939	FBti0057827	EPgy2	CGCAGTGC	TGGCGCAGTGCCAA		T	G	G	C	G	C	A	G	T	G	C	C	A	A
3L	-	3L-11090061	FBti0039992	EPgy2	TGTATAGA	ATTTGTATAGAATA		A	T	T	T	G	T	A	T	A	G	A	A	T	A
3L	-	3L-11091713	FBti0025272	EPgy2	AGTTGAAA	CTAAGTTGAAAAAT		C	T	A	A	G	T	T	G	A	A	A	A	A	T
3L	-	3L-11116537	FBti0027349	EPgy2	GTCCGACT	CACGTCCGACTGTT		C	A	C	G	T	C	C	G	A	C	T	G	T	T
3L	-	3L-11162697	FBti0025207	EPgy2	GCCTGGAG	AGCGCCTGGAGCGA		A	G	C	G	C	C	T	G	G	A	G	C	G	A
3L	-	3L-11203881	FBti0075957	EPgy2	AGCTGTCC	AACAGCTGTCCCAC		A	A	C	A	G	C	T	G	T	C	C	C	A	C
3L	-	3L-11236049	FBti0076023	EPgy2	AGGGGGAG	TTCAGGGGGAGAAA		T	T	C	A	G	G	G	G	G	A	G	A	A	A
3L	-	3L-11287985	FBti0039983	EPgy2	GGGAAAAC	ACTGGGAAAACTAA		A	C	T	G	G	G	A	A	A	A	C	T	A	A
3L	-	3L-11318061	FBti0038722	EPgy2	GGCCAATA	CAAGGCCAATAGAA		C	A	A	G	G	C	C	A	A	T	A	G	A	A
3L	-	3L-11329491	FBti0038989	EPgy2	GCATGTGC	GTGGCATGTGCAAT		G	T	G	G	C	A	T	G	T	G	C	A	A	T
3L	-	3L-11373526	FBti0038874	EPgy2	GGCGGATA	TTCGGCGGATATTT		T	T	C	G	G	C	G	G	A	T	A	T	T	T
3L	-	3L-11442503	FBti0075888	EPgy2	GCCCACAC	AAGGCCCACACGAA		A	A	G	G	C	C	C	A	C	A	C	G	A	A
3L	-	3L-11481196	FBti0039268	EPgy2	GGACGGAC	TTTGGACGGACGGT		T	T	T	G	G	A	C	G	G	A	C	G	G	T
3L	-	3L-11579904	FBti0038699	EPgy2	CCCGAATA	CAGCCCGAATAAAC		C	A	G	C	C	C	G	A	A	T	A	A	A	C
3L	-	3L-11690065	FBti0057614	EPgy2	CGCTAGGC	ATGCGCTAGGCTCT		A	T	G	C	G	C	T	A	G	G	C	T	C	T
3L	-	3L-11701633	FBti0039013	EPgy2	GACTGTTC	GTGGACTGTTCGTT		G	T	G	G	A	C	T	G	T	T	C	G	T	T
3L	-	3L-11782432	FBti0027259	EPgy2	GGTAGAGC	AGTGGTAGAGCGCT		A	G	T	G	G	T	A	G	A	G	C	G	C	T
3L	-	3L-11808123	FBti0057631	EPgy2	GCCAGCAC	AAGGCCAGCACAGT		A	A	G	G	C	C	A	G	C	A	C	A	G	T
3L	-	3L-11812836	FBti0024840	EPgy2	AGCCCACC	TGGAGCCCACCGAA		T	G	G	A	G	C	C	C	A	C	C	G	A	A
3L	-	3L-11826405	FBti0057659	EPgy2	ATACAATA	GCAATACAATATTT		G	C	A	A	T	A	C	A	A	T	A	T	T	T
3L	-	3L-11829769	FBti0027131	EPgy2	GGCTGTAT	AGTGGCTGTATAGT		A	G	T	G	G	C	T	G	T	A	T	A	G	T
3L	-	3L-11870876	FBti0038703	EPgy2	GGCTGATG	ATTGGCTGATGTCA		A	T	T	G	G	C	T	G	A	T	G	T	C	A
3L	-	3L-11986298	FBti0024875	EPgy2	GACTGGGC	ATTGACTGGGCGGC		A	T	T	G	A	C	T	G	G	G	C	G	G	C
3L	-	3L-12074960	FBti0039830	EPgy2	GCTTGGAG	TTAGCTTGGAGCTC		T	T	A	G	C	T	T	G	G	A	G	C	T	C
3L	-	3L-12139693	FBti0033348	EPgy2	AGATGGGG	TAGAGATGGGGCAA		T	A	G	A	G	A	T	G	G	G	G	C	A	A
3L	-	3L-12270316	FBti0027092	EPgy2	ATGCTGCC	CCAATGCTGCCCAT		C	C	A	A	T	G	C	T	G	C	C	C	A	T
3L	-	3L-12293271	FBti0038687	EPgy2	TTAATCTG	CTTTTAATCTGGAC		C	T	T	T	T	A	A	T	C	T	G	G	A	C
3L	-	3L-12401750	FBti0027393	EPgy2	CCCACGGC	ATGCCCACGGCAGT		A	T	G	C	C	C	A	C	G	G	C	A	G	T
3L	-	3L-12410626	FBti0027249	EPgy2	GATCGCCT	ACTGATCGCCTCGC		A	C	T	G	A	T	C	G	C	C	T	C	G	C
3L	-	3L-12519791	FBti0038792	EPgy2	GGGAAGGC	ATTGGGAAGGCTGA		A	T	T	G	G	G	A	A	G	G	C	T	G	A
3L	-	3L-12727708	FBti0027079	EPgy2	CGCTGAAC	CCCCGCTGAACGAT		C	C	C	C	G	C	T	G	A	A	C	G	A	T
3L	-	3L-12885749	FBti0057864	EPgy2	GCGCGGGC	TGAGCGCGGGCCAG		T	G	A	G	C	G	C	G	G	G	C	C	A	G
3L	-	3L-12895637	FBti0076131	EPgy2	GTCTGGCC	TCCGTCTGGCCTAA		T	C	C	G	T	C	T	G	G	C	C	T	A	A
3L	-	3L-13015758	FBti0039483	EPgy2	CGGCCACC	CTGCGGCCACCGAA		C	T	G	C	G	G	C	C	A	C	C	G	A	A
3L	-	3L-13025707	FBti0039196	EPgy2	GTGGCCAT	AAGGTGGCCATTGT		A	A	G	G	T	G	G	C	C	A	T	T	G	T
3L	-	3L-13029072	FBti0076129	EPgy2	CAGCGGAG	CACCAGCGGAGCAT		C	A	C	C	A	G	C	G	G	A	G	C	A	T
3L	-	3L-13405974	FBti0027382	EPgy2	ACCCTTGA	TTAACCCTTGAGCT		T	T	A	A	C	C	C	T	T	G	A	G	C	T
3L	-	3L-13659912	FBti0058048	EPgy2	GTTTAAAT	TTTGTTTAAATATA		T	T	T	G	T	T	T	A	A	A	T	A	T	A
3L	-	3L-13837254	FBti0039409	EPgy2	ATTCACCC	TCTATTCACCCATT		T	C	T	A	T	T	C	A	C	C	C	A	T	T
3L	-	3L-13860044	FBti0075953	EPgy2	ATCGGGCC	AATATCGGGCCTTT		A	A	T	A	T	C	G	G	G	C	C	T	T	T
3L	-	3L-13913105	FBti0039667	EPgy2	GCTGGGTT	ATCGCTGGGTTGTT		A	T	C	G	C	T	G	G	G	T	T	G	T	T
3L	-	3L-13928327	FBti0033389	EPgy2	TTTCCGCT	AACTTTCCGCTCGT		A	A	C	T	T	T	C	C	G	C	T	C	G	T
3L	-	3L-13999093	FBti0076085	EPgy2	ATCTTTGT	TCGATCTTTGTGTT		T	C	G	A	T	C	T	T	T	G	T	G	T	T
3L	-	3L-14024703	FBti0024894	EPgy2	GTCTTGTT	TCTGTCTTGTTTAC		T	C	T	G	T	C	T	T	G	T	T	T	A	C
3L	-	3L-14025291	FBti0024856	EPgy2	GGCTGGAC	TTGGGCTGGACGCT		T	T	G	G	G	C	T	G	G	A	C	G	C	T
3L	-	3L-14042996	FBti0057967	EPgy2	GTCTCGGC	CCAGTCTCGGCCAT		C	C	A	G	T	C	T	C	G	G	C	C	A	T
3L	-	3L-14070130	FBti0024910	EPgy2	AATGGGAC	AGTAATGGGACAGA		A	G	T	A	A	T	G	G	G	A	C	A	G	A
3L	-	3L-14214235	FBti0039468	EPgy2	CTAATAAC	TTACTAATAACAAA		T	T	A	C	T	A	A	T	A	A	C	A	A	A
3L	-	3L-14275494	FBti0027196	EPgy2	TGCTAGAC	CATTGCTAGACAAA		C	A	T	T	G	C	T	A	G	A	C	A	A	A
3L	-	3L-14403844	FBti0024885	EPgy2	AAAGGCGA	ATAAAAGGCGAGAA		A	T	A	A	A	A	G	G	C	G	A	G	A	A
3L	-	3L-14409566	FBti0027174	EPgy2	CCCCAAAT	GGGCCCCAAATCGA		G	G	G	C	C	C	C	A	A	A	T	C	G	A
3L	-	3L-14415217	FBti0077806	EPgy2	GGATGCTC	AACGGATGCTCAGT		A	A	C	G	G	A	T	G	C	T	C	A	G	T
3L	-	3L-14479967	FBti0038813	EPgy2	TCCCAGGC	ATGTCCCAGGCGTT		A	T	G	T	C	C	C	A	G	G	C	G	T	T
3L	-	3L-14544110	FBti0040148	EPgy2	GGCGGTAG	AGCGGCGGTAGCAG		A	G	C	G	G	C	G	G	T	A	G	C	A	G
3L	-	3L-14751082	FBti0039851	EPgy2	GTCTTAGG	ATCGTCTTAGGTAT		A	T	C	G	T	C	T	T	A	G	G	T	A	T
3L	-	3L-14768968	FBti0027391	EPgy2	ATTATAAC	TTCATTATAACCTT		T	T	C	A	T	T	A	T	A	A	C	C	T	T
3L	-	3L-14774374	FBti0027402	EPgy2	ACGCGAAA	CTTACGCGAAACAC		C	T	T	A	C	G	C	G	A	A	A	C	A	C
3L	-	3L-14782655	FBti0033360	EPgy2	AGTCGAAC	TACAGTCGAACGCG		T	A	C	A	G	T	C	G	A	A	C	G	C	G
3L	-	3L-14796535	FBti0100367	EPgy2	CTCTGCTA	TTGCTCTGCTAGGT		T	T	G	C	T	C	T	G	C	T	A	G	G	T
3L	-	3L-14970929	FBti0027291	EPgy2	GTATGGAC	GGGGTATGGACTCA		G	G	G	G	T	A	T	G	G	A	C	T	C	A
3L	-	3L-14992781	FBti0039492	EPgy2	CTGCCAAC	ATGCTGCCAACTAT		A	T	G	C	T	G	C	C	A	A	C	T	A	T
3L	-	3L-15007133	FBti0025233	EPgy2	CCACGCCA	CGGCCACGCCAGCA		C	G	G	C	C	A	C	G	C	C	A	G	C	A
3L	-	3L-15088246	FBti0039863	EPgy2	GTCTGTGA	TTAGTCTGTGATGT		T	T	A	G	T	C	T	G	T	G	A	T	G	T
3L	-	3L-15129337	FBti0033381	EPgy2	GAACTGTG	TTTGAACTGTGTGC		T	T	T	G	A	A	C	T	G	T	G	T	G	C
3L	-	3L-15135716	FBti0039880	EPgy2	GAAGAGAC	ATAGAAGAGACTCT		A	T	A	G	A	A	G	A	G	A	C	T	C	T
3L	-	3L-15136420	FBti0027376	EPgy2	CCCTGGAA	TGCCCCTGGAAGCT		T	G	C	C	C	C	T	G	G	A	A	G	C	T
3L	-	3L-15151639	FBti0039429	EPgy2	ATTCGTAG	AATATTCGTAGTAG		A	A	T	A	T	T	C	G	T	A	G	T	A	G
3L	-	3L-15154914	FBti0027315	EPgy2	ATTGCAAC	AACATTGCAACTAT		A	A	C	A	T	T	G	C	A	A	C	T	A	T
3L	-	3L-15170633	FBti0038945	EPgy2	GTACACAC	TATGTACACACGCT		T	A	T	G	T	A	C	A	C	A	C	G	C	T
3L	-	3L-15197026	FBti0057714	EPgy2	ACCACCAC	ATGACCACCACCAA		A	T	G	A	C	C	A	C	C	A	C	C	A	A
3L	-	3L-15228592	FBti0027099	EPgy2	CCCAACCC	CTCCCCAACCCCTT		C	T	C	C	C	C	A	A	C	C	C	C	T	T
3L	-	3L-15488129	FBti0039175	EPgy2	GCACTGCG	ATTGCACTGCGCTT		A	T	T	G	C	A	C	T	G	C	G	C	T	T
3L	-	3L-15502533	FBti0058001	EPgy2	CCGCGACT	TTGCCGCGACTATA		T	T	G	C	C	G	C	G	A	C	T	A	T	A
3L	-	3L-15517242	FBti0039006	EPgy2	GAAGCGAG	CACGAAGCGAGCCA		C	A	C	G	A	A	G	C	G	A	G	C	C	A
3L	-	3L-15541175	FBti0057949	EPgy2	ATTTGGAC	TGCATTTGGACAAT		T	G	C	A	T	T	T	G	G	A	C	A	A	T
3L	-	3L-15556146	FBti0057878	EPgy2	CGCCAAAC	TGTCGCCAAACACA		T	G	T	C	G	C	C	A	A	A	C	A	C	A
3L	-	3L-15569716	FBti0076128	EPgy2	ATCCATGG	AAAATCCATGGGCA		A	A	A	A	T	C	C	A	T	G	G	G	C	A
3L	-	3L-15573609	FBti0027089	EPgy2	ATCCACGC	AATATCCACGCTCA		A	A	T	A	T	C	C	A	C	G	C	T	C	A
3L	-	3L-15603462	FBti0076159	EPgy2	AATCCGTC	CTCAATCCGTCCAC		C	T	C	A	A	T	C	C	G	T	C	C	A	C
3L	-	3L-15721560	FBti0038995	EPgy2	ATCGTGCC	TTAATCGTGCCTAG		T	T	A	A	T	C	G	T	G	C	C	T	A	G
3L	-	3L-15725895	FBti0057718	EPgy2	ATTTGGAC	ATTATTTGGACTGC		A	T	T	A	T	T	T	G	G	A	C	T	G	C
3L	-	3L-15809454	FBti0039539	EPgy2	CCTCGCAC	ATGCCTCGCACTCT		A	T	G	C	C	T	C	G	C	A	C	T	C	T
3L	-	3L-15828483	FBti0027034	EPgy2	ATCTGGCG	GCCATCTGGCGGCA		G	C	C	A	T	C	T	G	G	C	G	G	C	A
3L	-	3L-15914281	FBti0039372	EPgy2	TACCTTAA	CTCTACCTTAATGA		C	T	C	T	A	C	C	T	T	A	A	T	G	A
3L	-	3L-15918017	FBti0038853	EPgy2	CTCCAACC	TCCCTCCAACCGGC		T	C	C	C	T	C	C	A	A	C	C	G	G	C
3L	-	3L-15946353	FBti0039846	EPgy2	GTCCGAAC	ATTGTCCGAACCAA		A	T	T	G	T	C	C	G	A	A	C	C	A	A
3L	-	3L-15981372	FBti0038965	EPgy2	GTCTCCCT	ACTGTCTCCCTTCT		A	C	T	G	T	C	T	C	C	C	T	T	C	T
3L	-	3L-15997361	FBti0077801	EPgy2	CTTCAAAC	GTGCTTCAAACTCT		G	T	G	C	T	T	C	A	A	A	C	T	C	T
3L	-	3L-16043386	FBti0025153	EPgy2	AGTCGAGT	GAGAGTCGAGTCGA		G	A	G	A	G	T	C	G	A	G	T	C	G	A
3L	-	3L-16080597	FBti0027360	EPgy2	AGCCAAGT	TGAAGCCAAGTCAT		T	G	A	A	G	C	C	A	A	G	T	C	A	T
3L	-	3L-16083474	FBti0039668	EPgy2	GTACGCAA	TCGGTACGCAATGG		T	C	G	G	T	A	C	G	C	A	A	T	G	G
3L	-	3L-16222255	FBti0039292	EPgy2	GAATGTTC	TCTGAATGTTCTTC		T	C	T	G	A	A	T	G	T	T	C	T	T	C
3L	-	3L-16332035	FBti0039153	EPgy2	CGTACGCC	GGCCGTACGCCTGT		G	G	C	C	G	T	A	C	G	C	C	T	G	T
3L	-	3L-16360865	FBti0057603	EPgy2	GGTTGGCT	AACGGTTGGCTAAG		A	A	C	G	G	T	T	G	G	C	T	A	A	G
3L	-	3L-16371238	FBti0038927	EPgy2	GTTGGCCC	TTAGTTGGCCCGAC		T	T	A	G	T	T	G	G	C	C	C	G	A	C
3L	-	3L-16378893	FBti0027124	EPgy2	AGCCAATC	CGAAGCCAATCGAA		C	G	A	A	G	C	C	A	A	T	C	G	A	A
3L	-	3L-16378945	FBti0057753	EPgy2	GGCACTCG	ATGGGCACTCGGAT		A	T	G	G	G	C	A	C	T	C	G	G	A	T
3L	-	3L-16404777	FBti0040035	EPgy2	TGCCAGAC	GCTTGCCAGACTTT		G	C	T	T	G	C	C	A	G	A	C	T	T	T
3L	-	3L-16476749	FBti0039727	EPgy2	AGCCGACT	AAAAGCCGACTAGT		A	A	A	A	G	C	C	G	A	C	T	A	G	T
3L	-	3L-16567749	FBti0039190	EPgy2	AGCGGGCG	ATAAGCGGGCGGAT		A	T	A	A	G	C	G	G	G	C	G	G	A	T
3L	-	3L-16574441	FBti0057901	EPgy2	CCTCAGTC	TCTCCTCAGTCGTT		T	C	T	C	C	T	C	A	G	T	C	G	T	T
3L	-	3L-16596156	FBti0039370	EPgy2	GGACGAGT	AACGGACGAGTGTC		A	A	C	G	G	A	C	G	A	G	T	G	T	C
3L	-	3L-16619595	FBti0057856	EPgy2	CTTTAAGC	ATGCTTTAAGCAAA		A	T	G	C	T	T	T	A	A	G	C	A	A	A
3L	-	3L-16654722	FBti0039718	EPgy2	TCACCTCC	TCGTCACCTCCTTT		T	C	G	T	C	A	C	C	T	C	C	T	T	T
3L	-	3L-16666722	FBti0057606	EPgy2	AGCGGAGT	GAGAGCGGAGTTGG		G	A	G	A	G	C	G	G	A	G	T	T	G	G
3L	-	3L-16706939	FBti0039636	EPgy2	TCATGGGT	TCGTCATGGGTTAA		T	C	G	T	C	A	T	G	G	G	T	T	A	A
3L	-	3L-16772726	FBti0038990	EPgy2	GATGGCAC	ATCGATGGCACAAT		A	T	C	G	A	T	G	G	C	A	C	A	A	T
3L	-	3L-16948850	FBti0075883	EPgy2	CAGCAACT	TCGCAGCAACTTGA		T	C	G	C	A	G	C	A	A	C	T	T	G	A
3L	-	3L-17009014	FBti0076120	EPgy2	AATAGAGC	AATAATAGAGCCAA		A	A	T	A	A	T	A	G	A	G	C	C	A	A
3L	-	3L-17026817	FBti0027040	EPgy2	GCCCAGAA	TTTGCCCAGAATGA		T	T	T	G	C	C	C	A	G	A	A	T	G	A
3L	-	3L-17247512	FBti0027076	EPgy2	GGTCGAAA	CTCGGTCGAAACTG		C	T	C	G	G	T	C	G	A	A	A	C	T	G
3L	-	3L-17332363	FBti0039892	EPgy2	CTCCAGTT	AGACTCCAGTTGGA		A	G	A	C	T	C	C	A	G	T	T	G	G	A
3L	-	3L-17333071	FBti0040092	EPgy2	GTTCTACC	ACTGTTCTACCGGA		A	C	T	G	T	T	C	T	A	C	C	G	G	A
3L	-	3L-17408870	FBti0058011	EPgy2	TCCTTGAC	ATCTCCTTGACGCT		A	T	C	T	C	C	T	T	G	A	C	G	C	T
3L	-	3L-17418363	FBti0025251	EPgy2	CCACCGAC	GAACCACCGACCCA		G	A	A	C	C	A	C	C	G	A	C	C	C	A
3L	-	3L-17468204	FBti0039464	EPgy2	GTCTACCC	TTCGTCTACCCCAA		T	T	C	G	T	C	T	A	C	C	C	C	A	A
3L	-	3L-17470813	FBti0038742	EPgy2	GCTCATAC	TTAGCTCATACCAT		T	T	A	G	C	T	C	A	T	A	C	C	A	T
3L	-	3L-17507034	FBti0076067	EPgy2	TGCGAATG	GAATGCGAATGCTC		G	A	A	T	G	C	G	A	A	T	G	C	T	C
3L	-	3L-17614609	FBti0027083	EPgy2	GTGTGAGC	TCTGTGTGAGCGAT		T	C	T	G	T	G	T	G	A	G	C	G	A	T
3L	-	3L-17644780	FBti0057803	EPgy2	CATATAAG	AAACATATAAGCAT		A	A	A	C	A	T	A	T	A	A	G	C	A	T
3L	-	3L-17834340	FBti0039762	EPgy2	ATTCGATC	TCGATTCGATCCGT		T	C	G	A	T	T	C	G	A	T	C	C	G	T
3L	-	3L-17842873	FBti0038798	EPgy2	GGTTAGCC	CTGGGTTAGCCACT		C	T	G	G	G	T	T	A	G	C	C	A	C	T
3L	-	3L-17958027	FBti0033134	EPgy2	GTACAAAT	GCAGTACAAATATT		G	C	A	G	T	A	C	A	A	A	T	A	T	T
3L	-	3L-18102643	FBti0076086	EPgy2	AGTCTGCT	TCCAGTCTGCTGCA		T	C	C	A	G	T	C	T	G	C	T	G	C	A
3L	-	3L-18107485	FBti0033320	EPgy2	CTCTGGCT	GTCCTCTGGCTTCT		G	T	C	C	T	C	T	G	G	C	T	T	C	T
3L	-	3L-18266021	FBti0075912	EPgy2	CCTCCGCC	GGGCCTCCGCCCCG		G	G	G	C	C	T	C	C	G	C	C	C	C	G
3L	-	3L-18279800	FBti0040114	EPgy2	TTTCAGCC	AAGTTTCAGCCATT		A	A	G	T	T	T	C	A	G	C	C	A	T	T
3L	-	3L-18611506	FBti0027257	EPgy2	GTTCGTTT	ACAGTTCGTTTCGT		A	C	A	G	T	T	C	G	T	T	T	C	G	T
3L	-	3L-18615812	FBti0076004	EPgy2	GTCGCACC	ATGGTCGCACCTTC		A	T	G	G	T	C	G	C	A	C	C	T	T	C
3L	-	3L-18665548	FBti0039288	EPgy2	CGCCACAC	AATCGCCACACCAT		A	A	T	C	G	C	C	A	C	A	C	C	A	T
3L	-	3L-18666231	FBti0039457	EPgy2	GACTGGAC	TTGGACTGGACTGT		T	T	G	G	A	C	T	G	G	A	C	T	G	T
3L	-	3L-18762066	FBti0075438	EPgy2	CTTCTGAT	TTGCTTCTGATGGC		T	T	G	C	T	T	C	T	G	A	T	G	G	C
3L	-	3L-18839455	FBti0057814	EPgy2	CTCTATGT	TTGCTCTATGTGAA		T	T	G	C	T	C	T	A	T	G	T	G	A	A
3L	-	3L-18883721	FBti0038937	EPgy2	GGTTAATC	TTCGGTTAATCACA		T	T	C	G	G	T	T	A	A	T	C	A	C	A
3L	-	3L-18965407	FBti0039627	EPgy2	GTCGTGGC	TTTGTCGTGGCCGA		T	T	T	G	T	C	G	T	G	G	C	C	G	A
3L	-	3L-18988969	FBti0040056	EPgy2	GTCCGAGC	ATCGTCCGAGCGAA		A	T	C	G	T	C	C	G	A	G	C	G	A	A
3L	-	3L-19038572	FBti0027063	EPgy2	CATCGAAA	ATACATCGAAAGTT		A	T	A	C	A	T	C	G	A	A	A	G	T	T
3L	-	3L-19067179	FBti0027112	EPgy2	GTTTAAGT	TTCGTTTAAGTCGA		T	T	C	G	T	T	T	A	A	G	T	C	G	A
3L	-	3L-19080211	FBti0027113	EPgy2	GGTTTGTC	GTCGGTTTGTCGCT		G	T	C	G	G	T	T	T	G	T	C	G	C	T
3L	-	3L-19083037	FBti0076065	EPgy2	AGTGGCAC	TGGAGTGGCACTAT		T	G	G	A	G	T	G	G	C	A	C	T	A	T
3L	-	3L-19163737	FBti0027115	EPgy2	GCTGCGAT	ATTGCTGCGATCGA		A	T	T	G	C	T	G	C	G	A	T	C	G	A
3L	-	3L-19253742	FBti0076100	EPgy2	CTCTGTTT	AAGCTCTGTTTTAA		A	A	G	C	T	C	T	G	T	T	T	T	A	A
3L	-	3L-19257485	FBti0039331	EPgy2	GTATGCAT	GTAGTATGCATAGT		G	T	A	G	T	A	T	G	C	A	T	A	G	T
3L	-	3L-19390072	FBti0076079	EPgy2	AACTGAAC	ACAAACTGAACCAC		A	C	A	A	A	C	T	G	A	A	C	C	A	C
3L	-	3L-19445357	FBti0038709	EPgy2	TGCCAAAG	ATGTGCCAAAGCAC		A	T	G	T	G	C	C	A	A	A	G	C	A	C
3L	-	3L-19471780	FBti0039117	EPgy2	CTACCGCC	AACCTACCGCCCGA		A	A	C	C	T	A	C	C	G	C	C	C	G	A
3L	-	3L-19551386	FBti0039135	EPgy2	CGCTACAT	TTACGCTACATATA		T	T	A	C	G	C	T	A	C	A	T	A	T	A
3L	-	3L-19779044	FBti0039116	EPgy2	CTCTAGAG	CACCTCTAGAGCCA		C	A	C	C	T	C	T	A	G	A	G	C	C	A
3L	-	3L-19784157	FBti0027100	EPgy2	GGACAGAC	AAAGGACAGACAAA		A	A	A	G	G	A	C	A	G	A	C	A	A	A
3L	-	3L-19888742	FBti0039510	EPgy2	CATTGGAC	AAGCATTGGACATG		A	A	G	C	A	T	T	G	G	A	C	A	T	G
3L	-	3L-19922382	FBti0033187	EPgy2	GCTCTCAC	TGCGCTCTCACTAT		T	G	C	G	C	T	C	T	C	A	C	T	A	T
3L	-	3L-19971458	FBti0038846	EPgy2	GAGCCGCG	ATGGAGCCGCGTCA		A	T	G	G	A	G	C	C	G	C	G	T	C	A
3L	-	3L-19999570	FBti0075908	EPgy2	GTTTGGCC	TTCGTTTGGCCGTT		T	T	C	G	T	T	T	G	G	C	C	G	T	T
3L	-	3L-20097965	FBti0027118	EPgy2	CTGTGGAG	TTGCTGTGGAGTGT		T	T	G	C	T	G	T	G	G	A	G	T	G	T
3L	-	3L-20179870	FBti0039641	EPgy2	ACGTGGAC	TTCACGTGGACATT		T	T	C	A	C	G	T	G	G	A	C	A	T	T
3L	-	3L-20191426	FBti0025254	EPgy2	CGCGATCC	ACCCGCGATCCGAA		A	C	C	C	G	C	G	A	T	C	C	G	A	A
3L	-	3L-20219532	FBti0075897	EPgy2	TGTTGGAC	TTGTGTTGGACCAA		T	T	G	T	G	T	T	G	G	A	C	C	A	A
3L	-	3L-20295216	FBti0057717	EPgy2	CACTGGCG	ACACACTGGCGTGT		A	C	A	C	A	C	T	G	G	C	G	T	G	T
3L	-	3L-20295555	FBti0075971	EPgy2	GTTGGGAT	ATAGTTGGGATTAA		A	T	A	G	T	T	G	G	G	A	T	T	A	A
3L	-	3L-20306875	FBti0039386	EPgy2	CACATAAT	AATCACATAATGTT		A	A	T	C	A	C	A	T	A	A	T	G	T	T
3L	-	3L-20394721	FBti0039944	EPgy2	GTCGTGAC	ACAGTCGTGACGAA		A	C	A	G	T	C	G	T	G	A	C	G	A	A
3L	-	3L-20409731	FBti0039276	EPgy2	ATCAGGAG	AAGATCAGGAGTTA		A	A	G	A	T	C	A	G	G	A	G	T	T	A
3L	-	3L-20420679	FBti0039251	EPgy2	GCACAGAT	AGAGCACAGATCGA		A	G	A	G	C	A	C	A	G	A	T	C	G	A
3L	-	3L-20766043	FBti0076066	EPgy2	GCTCAGTG	TTCGCTCAGTGCTA		T	T	C	G	C	T	C	A	G	T	G	C	T	A
3L	-	3L-20771239	FBti0039232	EPgy2	GGGCACGC	ACAGGGCACGCTTC		A	C	A	G	G	G	C	A	C	G	C	T	T	C
3L	-	3L-20772006	FBti0033201	EPgy2	GCTTACAG	ATGGCTTACAGTAC		A	T	G	G	C	T	T	A	C	A	G	T	A	C
3L	-	3L-20784579	FBti0039617	EPgy2	GTTTTGTC	AAGGTTTTGTCTTT		A	A	G	G	T	T	T	T	G	T	C	T	T	T
3L	-	3L-20809129	FBti0040189	EPgy2	CTTAAGGG	ATACTTAAGGGCGC		A	T	A	C	T	T	A	A	G	G	G	C	G	C
3L	-	3L-21000771	FBti0039441	EPgy2	GTCCGCCT	ATTGTCCGCCTTTT		A	T	T	G	T	C	C	G	C	C	T	T	T	T
3L	-	3L-21027741	FBti0039973	EPgy2	AGCTGCTC	TAAAGCTGCTCCAC		T	A	A	A	G	C	T	G	C	T	C	C	A	C
3L	-	3L-21124286	FBti0024138	EPgy2	CTTCAGCG	GAACTTCAGCGACT		G	A	A	C	T	T	C	A	G	C	G	A	C	T
3L	-	3L-21129183	FBti0057902	EPgy2	GTCGTGTC	ATCGTCGTGTCGTT		A	T	C	G	T	C	G	T	G	T	C	G	T	T
3L	-	3L-21166232	FBti0076071	EPgy2	GCTCTGCC	ATAGCTCTGCCGCT		A	T	A	G	C	T	C	T	G	C	C	G	C	T
3L	-	3L-21169064	FBti0058050	EPgy2	AATCGGAC	TCCAATCGGACCGA		T	C	C	A	A	T	C	G	G	A	C	C	G	A
3L	-	3L-21203302	FBti0057751	EPgy2	CGTGGAAC	TACCGTGGAACACT		T	A	C	C	G	T	G	G	A	A	C	A	C	T
3L	-	3L-21214367	FBti0057964	EPgy2	GCACGTAG	TTGGCACGTAGCAC		T	T	G	G	C	A	C	G	T	A	G	C	A	C
3L	-	3L-21273086	FBti0057732	EPgy2	GTTTAGCT	ATCGTTTAGCTTAT		A	T	C	G	T	T	T	A	G	C	T	T	A	T
3L	-	3L-21297500	FBti0040266	EPgy2	CTGCCGAG	TTGCTGCCGAGCAA		T	T	G	C	T	G	C	C	G	A	G	C	A	A
3L	-	3L-21338217	FBti0040258	EPgy2	GCCCAGAG	AGCGCCCAGAGCAG		A	G	C	G	C	C	C	A	G	A	G	C	A	G
3L	-	3L-21426561	FBti0038869	EPgy2	GGCTGCTC	AGCGGCTGCTCAAA		A	G	C	G	G	C	T	G	C	T	C	A	A	A
3L	-	3L-21501027	FBti0039396	EPgy2	GTTTGGGC	TCGGTTTGGGCCAA		T	C	G	G	T	T	T	G	G	G	C	C	A	A
3L	-	3L-21528208	FBti0024855	EPgy2	CTGTCAGC	TCTCTGTCAGCGGT		T	C	T	C	T	G	T	C	A	G	C	G	G	T
3L	-	3L-21801898	FBti0025127	EPgy2	GTGTGTAC	TTTGTGTGTACCTA		T	T	T	G	T	G	T	G	T	A	C	C	T	A
3L	-	3L-21823395	FBti0076015	EPgy2	GTCAGTTC	CTCGTCAGTTCTAA		C	T	C	G	T	C	A	G	T	T	C	T	A	A
3L	-	3L-22059230	FBti0025228	EPgy2	GAGTGACC	AGCGAGTGACCCGA		A	G	C	G	A	G	T	G	A	C	C	C	G	A
3L	-	3L-22256425	FBti0057983	EPgy2	GCCGGGCG	GATGCCGGGCGATT		G	A	T	G	C	C	G	G	G	C	G	A	T	T
3L	-	3L-22264326	FBti0076068	EPgy2	GCCCAGCA	CCCGCCCAGCAGCT		C	C	C	G	C	C	C	A	G	C	A	G	C	T
3L	-	3L-22400983	FBti0039700	EPgy2	GGCTGATG	GTCGGCTGATGTTT		G	T	C	G	G	C	T	G	A	T	G	T	T	T
3L	-	3L-22556199	FBti0038769	EPgy2	TTCTCTAT	TTCTTCTCTATGCA		T	T	C	T	T	C	T	C	T	A	T	G	C	A
3L	-	3L-22720891	FBti0038958	EPgy2	GTTAGTTC	AGTGTTAGTTCAAA		A	G	T	G	T	T	A	G	T	T	C	A	A	A
3L	-	3L-22828349	FBti0057903	EPgy2	CTTTGTAT	TTACTTTGTATTAA		T	T	A	C	T	T	T	G	T	A	T	T	A	A
3L	-	3L-22864158	FBti0039889	EPgy2	ACACTGAG	CCAACACTGAGTTC		C	C	A	A	C	A	C	T	G	A	G	T	T	C
3L	-	3L-22866776	FBti0027066	EPgy2	ACTGGTGC	AACACTGGTGCTGA		A	A	C	A	C	T	G	G	T	G	C	T	G	A
3L	-	3L-22894970	FBti0024919	EPgy2	GTTAATGT	ACCGTTAATGTTAA		A	C	C	G	T	T	A	A	T	G	T	T	A	A
3R	-	3R-31946	FBti0039174	EPgy2	GTTGTGTC	ATTGTTGTGTCTGT		A	T	T	G	T	T	G	T	G	T	C	T	G	T
3R	-	3R-107376	FBti0039560	EPgy2	CCCACACA	GCCCCCACACATTT		G	C	C	C	C	C	A	C	A	C	A	T	T	T
3R	-	3R-136645	FBti0027337	EPgy2	CGTAAGAG	ATGCGTAAGAGAGT		A	T	G	C	G	T	A	A	G	A	G	A	G	T
3R	-	3R-213485	FBti0057704	EPgy2	CCCACGGT	GTTCCCACGGTCAT		G	T	T	C	C	C	A	C	G	G	T	C	A	T
3R	-	3R-219906	FBti0040155	EPgy2	GGACGGAG	AAGGGACGGAGGAA		A	A	G	G	G	A	C	G	G	A	G	G	A	A
3R	-	3R-223615	FBti0039850	EPgy2	CCATGGAC	ATGCCATGGACAGT		A	T	G	C	C	A	T	G	G	A	C	A	G	T
3R	-	3R-254728	FBti0039724	EPgy2	TGCTGGGG	GCGTGCTGGGGCGC		G	C	G	T	G	C	T	G	G	G	G	C	G	C
3R	-	3R-259579	FBti0027302	EPgy2	GACCAACG	TAAGACCAACGCAT		T	A	A	G	A	C	C	A	A	C	G	C	A	T
3R	-	3R-279172	FBti0040107	EPgy2	CCCGGTAA	CTACCCGGTAATTT		C	T	A	C	C	C	G	G	T	A	A	T	T	T
3R	-	3R-301758	FBti0024924	EPgy2	ATCAGCAG	AATATCAGCAGCAA		A	A	T	A	T	C	A	G	C	A	G	C	A	A
3R	-	3R-466601	FBti0040124	EPgy2	AGCCAGAC	ATCAGCCAGACAAA		A	T	C	A	G	C	C	A	G	A	C	A	A	A
3R	-	3R-467677	FBti0039211	EPgy2	AGCTGGTA	GTGAGCTGGTATAA		G	T	G	A	G	C	T	G	G	T	A	T	A	A
3R	-	3R-543509	FBti0027086	EPgy2	GGCGACAG	AATGGCGACAGCTT		A	A	T	G	G	C	G	A	C	A	G	C	T	T
3R	-	3R-557678	FBti0039442	EPgy2	AACAGAAC	TCCAACAGAACGAA		T	C	C	A	A	C	A	G	A	A	C	G	A	A
3R	-	3R-566151	FBti0027087	EPgy2	TTCTGAGC	TTGTTCTGAGCTAC		T	T	G	T	T	C	T	G	A	G	C	T	A	C
3R	-	3R-736273	FBti0027048	EPgy2	GTCCAATC	AGGGTCCAATCCAA		A	G	G	G	T	C	C	A	A	T	C	C	A	A
3R	-	3R-778276	FBti0027331	EPgy2	CGGAAAGG	TTCCGGAAAGGGTG		T	T	C	C	G	G	A	A	A	G	G	G	T	G
3R	-	3R-985247	FBti0039173	EPgy2	CCCCAGAT	ACACCCCAGATGCA		A	C	A	C	C	C	C	A	G	A	T	G	C	A
3R	-	3R-1049094	FBti0027388	EPgy2	CGTATACG	TCACGTATACGTAT		T	C	A	C	G	T	A	T	A	C	G	T	A	T
3R	-	3R-1057981	FBti0038887	EPgy2	ACCTAGAC	ACAACCTAGACGCT		A	C	A	A	C	C	T	A	G	A	C	G	C	T
3R	-	3R-1059142	FBti0027041	EPgy2	GTGGTGAC	GTCGTGGTGACCGT		G	T	C	G	T	G	G	T	G	A	C	C	G	T
3R	-	3R-1076965	FBti0025275	EPgy2	GCTCAGAT	ATCGCTCAGATATT		A	T	C	G	C	T	C	A	G	A	T	A	T	T
3R	-	3R-1077213	FBti0039926	EPgy2	GTCTCAAA	ACGGTCTCAAAGCT		A	C	G	G	T	C	T	C	A	A	A	G	C	T
3R	-	3R-1108813	FBti0039192	EPgy2	CTCCAAGT	CCACTCCAAGTGAA		C	C	A	C	T	C	C	A	A	G	T	G	A	A
3R	-	3R-1180420	FBti0039536	EPgy2	AGCACTTA	CGCAGCACTTATGA		C	G	C	A	G	C	A	C	T	T	A	T	G	A
3R	-	3R-1183899	FBti0039623	EPgy2	GACTGAAT	TCGGACTGAATCTG		T	C	G	G	A	C	T	G	A	A	T	C	T	G
3R	-	3R-1218434	FBti0057946	EPgy2	GTATGCAC	TATGTATGCACACT		T	A	T	G	T	A	T	G	C	A	C	A	C	T
3R	-	3R-1271777	FBti0040232	EPgy2	GTCTACTG	GTTGTCTACTGACT		G	T	T	G	T	C	T	A	C	T	G	A	C	T
3R	-	3R-1290416	FBti0038933	EPgy2	CACGCACT	AATCACGCACTTTG		A	A	T	C	A	C	G	C	A	C	T	T	T	G
3R	-	3R-1293727	FBti0038860	EPgy2	AACTGGCG	TTAAACTGGCGTCA		T	T	A	A	A	C	T	G	G	C	G	T	C	A
3R	-	3R-1309602	FBti0039657	EPgy2	GTGTCGCC	CGTGTGTCGCCGAT		C	G	T	G	T	G	T	C	G	C	C	G	A	T
3R	-	3R-1349063	FBti0025266	EPgy2	ACCCCGCG	CCAACCCCGCGGAG		C	C	A	A	C	C	C	C	G	C	G	G	A	G
3R	-	3R-1376321	FBti0039496	EPgy2	GTCCACGT	TTTGTCCACGTCTT		T	T	T	G	T	C	C	A	C	G	T	C	T	T
3R	-	3R-1391091	FBti0040111	EPgy2	GTCTTGGG	TGAGTCTTGGGTTT		T	G	A	G	T	C	T	T	G	G	G	T	T	T
3R	-	3R-1394712	FBti0039507	EPgy2	CTCCGTCT	GTACTCCGTCTTTT		G	T	A	C	T	C	C	G	T	C	T	T	T	T
3R	-	3R-1426312	FBti0040171	EPgy2	GTTGTGAG	CTTGTTGTGAGCGT		C	T	T	G	T	T	G	T	G	A	G	C	G	T
3R	-	3R-1437688	FBti0040136	EPgy2	GTTAAAGA	AAAGTTAAAGAGTT		A	A	A	G	T	T	A	A	A	G	A	G	T	T
3R	-	3R-1449831	FBti0039234	EPgy2	GTCTGGGG	GTGGTCTGGGGAAA		G	T	G	G	T	C	T	G	G	G	G	A	A	A
3R	-	3R-1474090	FBti0040138	EPgy2	CACCAAAG	TTACACCAAAGCAT		T	T	A	C	A	C	C	A	A	A	G	C	A	T
3R	-	3R-1480531	FBti0039873	EPgy2	GGTTGGTT	GTCGGTTGGTTCAT		G	T	C	G	G	T	T	G	G	T	T	C	A	T
3R	-	3R-1485605	FBti0025154	EPgy2	AACGAGAC	TTAAACGAGACAGT		T	T	A	A	A	C	G	A	G	A	C	A	G	T
3R	-	3R-1546098	FBti0038906	EPgy2	ATCAGAAC	CACATCAGAACCGT		C	A	C	A	T	C	A	G	A	A	C	C	G	T
3R	-	3R-1562479	FBti0038713	EPgy2	AATGGCAC	TTGAATGGCACCGA		T	T	G	A	A	T	G	G	C	A	C	C	G	A
3R	-	3R-1567914	FBti0075895	EPgy2	CCGATTTG	AGACCGATTTGAAA		A	G	A	C	C	G	A	T	T	T	G	A	A	A
3R	-	3R-1614857	FBti0075998	EPgy2	TGCATATG	ATATGCATATGCGA		A	T	A	T	G	C	A	T	A	T	G	C	G	A
3R	-	3R-1627930	FBti0025283	EPgy2	GTGTGAAC	TTGGTGTGAACGTC		T	T	G	G	T	G	T	G	A	A	C	G	T	C
3R	-	3R-1648213	FBti0027293	EPgy2	GTCTAGAC	AAAGTCTAGACATT		A	A	A	G	T	C	T	A	G	A	C	A	T	T
3R	-	3R-1650522	FBti0038966	EPgy2	AACTGAAC	GCTAACTGAACTAA		G	C	T	A	A	C	T	G	A	A	C	T	A	A
3R	-	3R-1687564	FBti0039108	EPgy2	CTCTCGCC	TCGCTCTCGCCCTC		T	C	G	C	T	C	T	C	G	C	C	C	T	C
3R	-	3R-1834027	FBti0039870	EPgy2	CAACAAGC	TTGCAACAAGCCAA		T	T	G	C	A	A	C	A	A	G	C	C	A	A
3R	-	3R-1850171	FBti0057756	EPgy2	TTGTATCT	GCGTTGTATCTAAA		G	C	G	T	T	G	T	A	T	C	T	A	A	A
3R	-	3R-2176153	FBti0039625	EPgy2	CGCCAAGG	ATCCGCCAAGGTGA		A	T	C	C	G	C	C	A	A	G	G	T	G	A
3R	-	3R-2485887	FBti0039132	EPgy2	CATTACAC	GCACATTACACTGA		G	C	A	C	A	T	T	A	C	A	C	T	G	A
3R	-	3R-2901371	FBti0027347	EPgy2	GTCGCGTG	TCTGTCGCGTGGGT		T	C	T	G	T	C	G	C	G	T	G	G	G	T
3R	-	3R-2934183	FBti0039991	EPgy2	GGACGGCG	ATTGGACGGCGGAA		A	T	T	G	G	A	C	G	G	C	G	G	A	A
3R	-	3R-2939070	FBti0057813	EPgy2	CTTCCTGC	AACCTTCCTGCTGA		A	A	C	C	T	T	C	C	T	G	C	T	G	A
3R	-	3R-2976040	FBti0038827	EPgy2	ATCCAGAC	TGTATCCAGACACA		T	G	T	A	T	C	C	A	G	A	C	A	C	A
3R	-	3R-2976684	FBti0027356	EPgy2	AGCTGACC	AAAAGCTGACCAGT		A	A	A	A	G	C	T	G	A	C	C	A	G	T
3R	-	3R-2977081	FBti0024066	EPgy2	CCTGGACG	ATGCCTGGACGTGT		A	T	G	C	C	T	G	G	A	C	G	T	G	T
3R	-	3R-3465132	FBti0100354	EPgy2	GTGTGCGA	TATGTGTGCGATAT		T	A	T	G	T	G	T	G	C	G	A	T	A	T
3R	-	3R-3712490	FBti0076052	EPgy2	CTCCAGCA	TCTCTCCAGCAATT		T	C	T	C	T	C	C	A	G	C	A	A	T	T
3R	-	3R-3716821	FBti0033153	EPgy2	GTTATGCG	ACTGTTATGCGGGA		A	C	T	G	T	T	A	T	G	C	G	G	G	A
3R	-	3R-3852850	FBti0040064	EPgy2	ATACGGAC	CTGATACGGACGAA		C	T	G	A	T	A	C	G	G	A	C	G	A	A
3R	-	3R-4129805	FBti0027082	EPgy2	CTCCGTGC	TAGCTCCGTGCGAA		T	A	G	C	T	C	C	G	T	G	C	G	A	A
3R	-	3R-4183581	FBti0039359	EPgy2	CCCCCGCC	TCTCCCCCGCCATG		T	C	T	C	C	C	C	C	G	C	C	A	T	G
3R	-	3R-4188275	FBti0057791	EPgy2	CGGGGGAA	AAGCGGGGGAATTG		A	A	G	C	G	G	G	G	G	A	A	T	T	G
3R	-	3R-4303348	FBti0039772	EPgy2	GTGCAGCC	TATGTGCAGCCCTT		T	A	T	G	T	G	C	A	G	C	C	C	T	T
3R	-	3R-4309682	FBti0057939	EPgy2	GCCGGCTA	TGTGCCGGCTACTT		T	G	T	G	C	C	G	G	C	T	A	C	T	T
3R	-	3R-4478721	FBti0025189	EPgy2	GCCGCAAC	AATGCCGCAACGAC		A	A	T	G	C	C	G	C	A	A	C	G	A	C
3R	-	3R-4486131	FBti0039957	EPgy2	GCTCCGCC	AGCGCTCCGCCAAA		A	G	C	G	C	T	C	C	G	C	C	A	A	A
3R	-	3R-4490039	FBti0038825	EPgy2	AGCCGGCA	ACTAGCCGGCATTT		A	C	T	A	G	C	C	G	G	C	A	T	T	T
3R	-	3R-4541585	FBti0027341	EPgy2	ATTTGTAT	CACATTTGTATACA		C	A	C	A	T	T	T	G	T	A	T	A	C	A
3R	-	3R-4581315	FBti0039323	EPgy2	ATCGGAGG	CCAATCGGAGGCCC		C	C	A	A	T	C	G	G	A	G	G	C	C	C
3R	-	3R-4683377	FBti0027046	EPgy2	GCTTCACC	AGTGCTTCACCGTT		A	G	T	G	C	T	T	C	A	C	C	G	T	T
3R	-	3R-4781369	FBti0027389	EPgy2	CACGGAAG	GTGCACGGAAGCCT		G	T	G	C	A	C	G	G	A	A	G	C	C	T
3R	-	3R-4873592	FBti0039749	EPgy2	CGTCGTTG	ATCCGTCGTTGTTG		A	T	C	C	G	T	C	G	T	T	G	T	T	G
3R	-	3R-4890797	FBti0033347	EPgy2	GCCCGCAC	AACGCCCGCACACA		A	A	C	G	C	C	C	G	C	A	C	A	C	A
3R	-	3R-5018280	FBti0038816	EPgy2	GGCCGGCT	ACCGGCCGGCTTAC		A	C	C	G	G	C	C	G	G	C	T	T	A	C
3R	-	3R-5165388	FBti0038833	EPgy2	GAGTGAAC	AAGGAGTGAACCAT		A	A	G	G	A	G	T	G	A	A	C	C	A	T
3R	-	3R-5230014	FBti0027051	EPgy2	GAGCATAC	AATGAGCATACTAT		A	A	T	G	A	G	C	A	T	A	C	T	A	T
3R	-	3R-5328311	FBti0039645	EPgy2	ATACTGCC	GTCATACTGCCCAA		G	T	C	A	T	A	C	T	G	C	C	C	A	A
3R	-	3R-5336551	FBti0024861	EPgy2	AGCCGAAC	AACAGCCGAACAAA		A	A	C	A	G	C	C	G	A	A	C	A	A	A
3R	-	3R-5341611	FBti0024925	EPgy2	AGTAGAGC	TAGAGTAGAGCAAA		T	A	G	A	G	T	A	G	A	G	C	A	A	A
3R	-	3R-5342696	FBti0039826	EPgy2	GTCTCAGG	AATGTCTCAGGTAA		A	A	T	G	T	C	T	C	A	G	G	T	A	A
3R	-	3R-5369417	FBti0027471	EPgy2	GCCAAGAC	TGGGCCAAGACGAT		T	G	G	G	C	C	A	A	G	A	C	G	A	T
3R	-	3R-5389372	FBti0040061	EPgy2	GCGTGGCC	TGAGCGTGGCCCAA		T	G	A	G	C	G	T	G	G	C	C	C	A	A
3R	-	3R-5403785	FBti0027563	EPgy2	GCTCGGCG	TCGGCTCGGCGACA		T	C	G	G	C	T	C	G	G	C	G	A	C	A
3R	-	3R-5454543	FBti0039540	EPgy2	GCTGGGTC	TGGGCTGGGTCTTT		T	G	G	G	C	T	G	G	G	T	C	T	T	T
3R	-	3R-5456564	FBti0039679	EPgy2	ACCAAAAC	TAGACCAAAACCAT		T	A	G	A	C	C	A	A	A	A	C	C	A	T
3R	-	3R-5503743	FBti0039245	EPgy2	TTACGCAC	GCGTTACGCACAAA		G	C	G	T	T	A	C	G	C	A	C	A	A	A
3R	-	3R-5566642	FBti0024121	EPgy2	GCACCGCC	ACTGCACCGCCAAT		A	C	T	G	C	A	C	C	G	C	C	A	A	T
3R	-	3R-5585634	FBti0057947	EPgy2	ATTTCAGG	TGTATTTCAGGCTA		T	G	T	A	T	T	T	C	A	G	G	C	T	A
3R	-	3R-5597692	FBti0058016	EPgy2	ATTTGAGG	CCAATTTGAGGCAT		C	C	A	A	T	T	T	G	A	G	G	C	A	T
3R	-	3R-5634777	FBti0039590	EPgy2	GGGTTACT	ATTGGGTTACTTAT		A	T	T	G	G	G	T	T	A	C	T	T	A	T
3R	-	3R-5754481	FBti0039134	EPgy2	GGCTGGAT	AATGGCTGGATGGC		A	A	T	G	G	C	T	G	G	A	T	G	G	C
3R	-	3R-5811802	FBti0038710	EPgy2	AGTTCAAC	TTTAGTTCAACATA		T	T	T	A	G	T	T	C	A	A	C	A	T	A
3R	-	3R-5970463	FBti0076026	EPgy2	CGCCAGCG	CATCGCCAGCGCCT		C	A	T	C	G	C	C	A	G	C	G	C	C	T
3R	-	3R-6238620	FBti0024114	EPgy2	CCACAACT	TCGCCACAACTGAG		T	C	G	C	C	A	C	A	A	C	T	G	A	G
3R	-	3R-6675724	FBti0040254	EPgy2	ACGCAGCG	ATGACGCAGCGTCA		A	T	G	A	C	G	C	A	G	C	G	T	C	A
3R	-	3R-6693431	FBti0076064	EPgy2	GACATACC	AACGACATACCCAT		A	A	C	G	A	C	A	T	A	C	C	C	A	T
3R	-	3R-7036007	FBti0039583	EPgy2	AATATGTG	AGCAATATGTGTGT		A	G	C	A	A	T	A	T	G	T	G	T	G	T
3R	-	3R-7060890	FBti0057674	EPgy2	CGGGGAGC	AAGCGGGGAGCTTT		A	A	G	C	G	G	G	G	A	G	C	T	T	T
3R	-	3R-7069685	FBti0039868	EPgy2	GCCCACGT	AAGGCCCACGTCAT		A	A	G	G	C	C	C	A	C	G	T	C	A	T
3R	-	3R-7079691	FBti0057957	EPgy2	GGATAGCC	AGGGGATAGCCTTT		A	G	G	G	G	A	T	A	G	C	C	T	T	T
3R	-	3R-7261280	FBti0039157	EPgy2	CCTCCATC	ATGCCTCCATCGCT		A	T	G	C	C	T	C	C	A	T	C	G	C	T
3R	-	3R-7392785	FBti0039869	EPgy2	GTCGGGGC	GTTGTCGGGGCGTT		G	T	T	G	T	C	G	G	G	G	C	G	T	T
3R	-	3R-7445611	FBti0057815	EPgy2	AGCCATCA	AAAAGCCATCAGCA		A	A	A	A	G	C	C	A	T	C	A	G	C	A
3R	-	3R-7567497	FBti0033244	EPgy2	ACCAAAAC	AACACCAAAACTTT		A	A	C	A	C	C	A	A	A	A	C	T	T	T
3R	-	3R-7584269	FBti0024863	EPgy2	GGTTAGAC	TTAGGTTAGACTCA		T	T	A	G	G	T	T	A	G	A	C	T	C	A
3R	-	3R-7782350	FBti0038975	EPgy2	TTCTGGCT	AGGTTCTGGCTGCA		A	G	G	T	T	C	T	G	G	C	T	G	C	A
3R	-	3R-7788892	FBti0033230	EPgy2	CTCTGACT	ATACTCTGACTAAA		A	T	A	C	T	C	T	G	A	C	T	A	A	A
3R	-	3R-7810454	FBti0027342	EPgy2	CAAAGGGG	CTCCAAAGGGGAGA		C	T	C	C	A	A	A	G	G	G	G	A	G	A
3R	-	3R-7820766	FBti0075866	EPgy2	ATCGGACG	AATATCGGACGAGA		A	A	T	A	T	C	G	G	A	C	G	A	G	A
3R	-	3R-7831377	FBti0057736	EPgy2	GGCCACTC	TTCGGCCACTCGCT		T	T	C	G	G	C	C	A	C	T	C	G	C	T
3R	-	3R-7836158	FBti0057671	EPgy2	CTATATAG	ATACTATATAGCCA		A	T	A	C	T	A	T	A	T	A	G	C	C	A
3R	-	3R-7842619	FBti0038721	EPgy2	TTCCCAGT	AGGTTCCCAGTTGT		A	G	G	T	T	C	C	C	A	G	T	T	G	T
3R	-	3R-7913308	FBti0058038	EPgy2	TTCCGGAC	ACTTTCCGGACTCT		A	C	T	T	T	C	C	G	G	A	C	T	C	T
3R	-	3R-8047556	FBti0039317	EPgy2	GTCTAGAC	CCTGTCTAGACAAA		C	C	T	G	T	C	T	A	G	A	C	A	A	A
3R	-	3R-8234099	FBti0075995	EPgy2	GTTTTGGC	ATTGTTTTGGCCTG		A	T	T	G	T	T	T	T	G	G	C	C	T	G
3R	-	3R-8255016	FBti0039874	EPgy2	GTCTATGT	TATGTCTATGTGAT		T	A	T	G	T	C	T	A	T	G	T	G	A	T
3R	-	3R-8304112	FBti0039634	EPgy2	GTCCGTTA	TGCGTCCGTTATAA		T	G	C	G	T	C	C	G	T	T	A	T	A	A
3R	-	3R-8538552	FBti0037933	EPgy2	GGGGAGTC	TGGGGGGAGTCGAT		T	G	G	G	G	G	G	A	G	T	C	G	A	T
3R	-	3R-8827730	FBti0027116	EPgy2	ACCTGGTT	ATTACCTGGTTCTA		A	T	T	A	C	C	T	G	G	T	T	C	T	A
3R	-	3R-8856626	FBti0058009	EPgy2	GACGGGAC	AAAGACGGGACCAG		A	A	A	G	A	C	G	G	G	A	C	C	A	G
3R	-	3R-8856858	FBti0057693	EPgy2	AACCAAGC	AGTAACCAAGCGAC		A	G	T	A	A	C	C	A	A	G	C	G	A	C
3R	-	3R-8868641	FBti0075451	EPgy2	GTCGGACA	ATAGTCGGACAGCA		A	T	A	G	T	C	G	G	A	C	A	G	C	A
3R	-	3R-8878085	FBti0025194	EPgy2	GGTTTGCA	TCCGGTTTGCATTG		T	C	C	G	G	T	T	T	G	C	A	T	T	G
3R	-	3R-9214418	FBti0075924	EPgy2	GGGGAAAT	ATGGGGGAAATGCT		A	T	G	G	G	G	G	A	A	A	T	G	C	T
3R	-	3R-9226390	FBti0039698	EPgy2	GCCTGGAA	TTTGCCTGGAATTT		T	T	T	G	C	C	T	G	G	A	A	T	T	T
3R	-	3R-9260660	FBti0027429	EPgy2	GGTTGGGT	GCTGGTTGGGTCAC		G	C	T	G	G	T	T	G	G	G	T	C	A	C
3R	-	3R-9472714	FBti0039862	EPgy2	GTACCATG	AGAGTACCATGCCT		A	G	A	G	T	A	C	C	A	T	G	C	C	T
3R	-	3R-9496429	FBti0076161	EPgy2	AGTGGAGC	AAAAGTGGAGCAGA		A	A	A	A	G	T	G	G	A	G	C	A	G	A
3R	-	3R-9508905	FBti0039708	EPgy2	GTTTGTGC	GCAGTTTGTGCGCT		G	C	A	G	T	T	T	G	T	G	C	G	C	T
3R	-	3R-9540073	FBti0038806	EPgy2	CATTGGAG	TTGCATTGGAGCCT		T	T	G	C	A	T	T	G	G	A	G	C	C	T
3R	-	3R-9622448	FBti0033173	EPgy2	GGCGCAGC	TGCGGCGCAGCGTT		T	G	C	G	G	C	G	C	A	G	C	G	T	T
3R	-	3R-9638717	FBti0039278	EPgy2	ATTTACAC	ATGATTTACACACT		A	T	G	A	T	T	T	A	C	A	C	A	C	T
3R	-	3R-9790649	FBti0033301	EPgy2	GTGTAAGC	TTCGTGTAAGCAGT		T	T	C	G	T	G	T	A	A	G	C	A	G	T
3R	-	3R-9802077	FBti0075841	EPgy2	ATCCAGCC	CATATCCAGCCCAC		C	A	T	A	T	C	C	A	G	C	C	C	A	C
3R	-	3R-9809602	FBti0040253	EPgy2	TCCCAGAC	ATTTCCCAGACATT		A	T	T	T	C	C	C	A	G	A	C	A	T	T
3R	-	3R-9934361	FBti0057977	EPgy2	GCTTAGCC	ATCGCTTAGCCCTT		A	T	C	G	C	T	T	A	G	C	C	C	T	T
3R	-	3R-9947923	FBti0075450	EPgy2	AAATAGAC	TAGAAATAGACAAA		T	A	G	A	A	A	T	A	G	A	C	A	A	A
3R	-	3R-10108571	FBti0057862	EPgy2	ATATATCC	TACATATATCCCAT		T	A	C	A	T	A	T	A	T	C	C	C	A	T
3R	-	3R-10141940	FBti0027335	EPgy2	GTCCACAC	AGGGTCCACACGAT		A	G	G	G	T	C	C	A	C	A	C	G	A	T
3R	-	3R-10187497	FBti0039361	EPgy2	GGGCTCGG	AGTGGGCTCGGGTT		A	G	T	G	G	G	C	T	C	G	G	G	T	T
3R	-	3R-10401195	FBti0076042	EPgy2	ACTGGACC	ATAACTGGACCCAA		A	T	A	A	C	T	G	G	A	C	C	C	A	A
3R	-	3R-10417309	FBti0039366	EPgy2	ATTCAGCT	GCGATTCAGCTGGA		G	C	G	A	T	T	C	A	G	C	T	G	G	A
3R	-	3R-10476924	FBti0027351	EPgy2	GACCGGGG	ATGGACCGGGGTTT		A	T	G	G	A	C	C	G	G	G	G	T	T	T
3R	-	3R-10482101	FBti0027282	EPgy2	CATCGGAC	ACACATCGGACTGA		A	C	A	C	A	T	C	G	G	A	C	T	G	A
3R	-	3R-10512929	FBti0027215	EPgy2	CGCCGGAG	GATCGCCGGAGAAA		G	A	T	C	G	C	C	G	G	A	G	A	A	A
3R	-	3R-10523038	FBti0024849	EPgy2	ATTTGGGT	TAGATTTGGGTCAA		T	A	G	A	T	T	T	G	G	G	T	C	A	A
3R	-	3R-10536765	FBti0076034	EPgy2	CTCTGGAG	TCTCTCTGGAGACT		T	C	T	C	T	C	T	G	G	A	G	A	C	T
3R	-	3R-10549953	FBti0039921	EPgy2	GTTTCGGC	TCGGTTTCGGCCAA		T	C	G	G	T	T	T	C	G	G	C	C	A	A
3R	-	3R-10557378	FBti0033212	EPgy2	CTCTGGCA	GATCTCTGGCAAAA		G	A	T	C	T	C	T	G	G	C	A	A	A	A
3R	-	3R-10637517	FBti0039123	EPgy2	GGAGTAAC	AGCGGAGTAACAAA		A	G	C	G	G	A	G	T	A	A	C	A	A	A
3R	-	3R-10719716	FBti0039205	EPgy2	GATTGGAG	TTTGATTGGAGGAA		T	T	T	G	A	T	T	G	G	A	G	G	A	A
3R	-	3R-11004211	FBti0040085	EPgy2	TGCCAGGC	AAATGCCAGGCTTC		A	A	A	T	G	C	C	A	G	G	C	T	T	C
3R	-	3R-11048684	FBti0040140	EPgy2	GCTTCGAA	CTCGCTTCGAACAT		C	T	C	G	C	T	T	C	G	A	A	C	A	T
3R	-	3R-11075681	FBti0027169	EPgy2	GGCGAAGC	CAGGGCGAAGCAGA		C	A	G	G	G	C	G	A	A	G	C	A	G	A
3R	-	3R-11094407	FBti0040200	EPgy2	AGCCAGCG	AATAGCCAGCGCAC		A	A	T	A	G	C	C	A	G	C	G	C	A	C
3R	-	3R-11101281	FBti0039418	EPgy2	ATATGAAG	AGAATATGAAGCAT		A	G	A	A	T	A	T	G	A	A	G	C	A	T
3R	-	3R-11311841	FBti0057746	EPgy2	CTCAGCGC	TCCCTCAGCGCTAA		T	C	C	C	T	C	A	G	C	G	C	T	A	A
3R	-	3R-11372679	FBti0027071	EPgy2	GTCCACTC	TTGGTCCACTCGCA		T	T	G	G	T	C	C	A	C	T	C	G	C	A
3R	-	3R-11761148	FBti0039500	EPgy2	GCACATCC	AATGCACATCCGTA		A	A	T	G	C	A	C	A	T	C	C	G	T	A
3R	-	3R-11789517	FBti0039499	EPgy2	TTCGAACT	TGGTTCGAACTGAA		T	G	G	T	T	C	G	A	A	C	T	G	A	A
3R	-	3R-11798972	FBti0024852	EPgy2	GTTCGAAC	TTGGTTCGAACTGA		T	T	G	G	T	T	C	G	A	A	C	T	G	A
3R	-	3R-11875112	FBti0039839	EPgy2	GCCCTGGC	AGAGCCCTGGCCAA		A	G	A	G	C	C	C	T	G	G	C	C	A	A
3R	-	3R-11923391	FBti0024858	EPgy2	GCCATGCG	TTGGCCATGCGGGA		T	T	G	G	C	C	A	T	G	C	G	G	G	A
3R	-	3R-12063605	FBti0057932	EPgy2	GTGTGAAT	ACTGTGTGAATTTT		A	C	T	G	T	G	T	G	A	A	T	T	T	T
3R	-	3R-12131418	FBti0027070	EPgy2	CTCCAACT	AATCTCCAACTCTA		A	A	T	C	T	C	C	A	A	C	T	C	T	A
3R	-	3R-12168238	FBti0076133	EPgy2	GTCTGCGA	TGGGTCTGCGATTG		T	G	G	G	T	C	T	G	C	G	A	T	T	G
3R	-	3R-12185013	FBti0038972	EPgy2	GCAAGGAG	ATGGCAAGGAGCAG		A	T	G	G	C	A	A	G	G	A	G	C	A	G
3R	-	3R-12187430	FBti0039184	EPgy2	ATCTACAC	TATATCTACACTCG		T	A	T	A	T	C	T	A	C	A	C	T	C	G
3R	-	3R-12280335	FBti0039413	EPgy2	GCTTAGCT	TTCGCTTAGCTAAT		T	T	C	G	C	T	T	A	G	C	T	A	A	T
3R	-	3R-12866285	FBti0057626	EPgy2	GTTCCTGC	TCGGTTCCTGCCCT		T	C	G	G	T	T	C	C	T	G	C	C	C	T
3R	-	3R-12907669	FBti0039484	EPgy2	TCCCAATC	AGGTCCCAATCAGA		A	G	G	T	C	C	C	A	A	T	C	A	G	A
3R	-	3R-12911400	FBti0033310	EPgy2	GGCCACTG	ATAGGCCACTGTTT		A	T	A	G	G	C	C	A	C	T	G	T	T	T
3R	-	3R-13073602	FBti0038753	EPgy2	CGCCGACC	AAACGCCGACCATT		A	A	A	C	G	C	C	G	A	C	C	A	T	T
3R	-	3R-13429545	FBti0057986	EPgy2	CCCACGAC	CTACCCACGACTAT		C	T	A	C	C	C	A	C	G	A	C	T	A	T
3R	-	3R-13480258	FBti0038970	EPgy2	CTCCGGCC	TACCTCCGGCCACA		T	A	C	C	T	C	C	G	G	C	C	A	C	A
3R	-	3R-13492252	FBti0057723	EPgy2	GTTCGAGC	TTAGTTCGAGCTGA		T	T	A	G	T	T	C	G	A	G	C	T	G	A
3R	-	3R-13615644	FBti0027346	EPgy2	ATGTGCTC	TAAATGTGCTCATA		T	A	A	A	T	G	T	G	C	T	C	A	T	A
3R	-	3R-13620318	FBti0027080	EPgy2	CCCTAGAG	ACCCCCTAGAGCTT		A	C	C	C	C	C	T	A	G	A	G	C	T	T
3R	-	3R-13992115	FBti0033142	EPgy2	GCATGGAG	ACCGCATGGAGCTT		A	C	C	G	C	A	T	G	G	A	G	C	T	T
3R	-	3R-13998022	FBti0076074	EPgy2	ATTCCACC	TTGATTCCACCTCT		T	T	G	A	T	T	C	C	A	C	C	T	C	T
3R	-	3R-14011211	FBti0033364	EPgy2	GACCGAGC	AAAGACCGAGCCAG		A	A	A	G	A	C	C	G	A	G	C	C	A	G
3R	-	3R-14022817	FBti0057617	EPgy2	GGAGCAGC	ACTGGAGCAGCGAA		A	C	T	G	G	A	G	C	A	G	C	G	A	A
3R	-	3R-14081234	FBti0039151	EPgy2	GGTAGAAG	TGAGGTAGAAGCAA		T	G	A	G	G	T	A	G	A	A	G	C	A	A
3R	-	3R-14127460	FBti0024841	EPgy2	GGCCCACT	TTTGGCCCACTGTT		T	T	T	G	G	C	C	C	A	C	T	G	T	T
3R	-	3R-14140569	FBti0057929	EPgy2	CTTCTGAA	GGGCTTCTGAAAGA		G	G	G	C	T	T	C	T	G	A	A	A	G	A
3R	-	3R-14222688	FBti0039987	EPgy2	CGGCTGCC	TCCCGGCTGCCCAT		T	C	C	C	G	G	C	T	G	C	C	C	A	T
3R	-	3R-14229098	FBti0027030	EPgy2	GCCCAAGA	ATTGCCCAAGAAGT		A	T	T	G	C	C	C	A	A	G	A	A	G	T
3R	-	3R-14238596	FBti0057961	EPgy2	GACATCGG	ATCGACATCGGTTG		A	T	C	G	A	C	A	T	C	G	G	T	T	G
3R	-	3R-14276022	FBti0038905	EPgy2	GCGCAGAG	GCAGCGCAGAGGCT		G	C	A	G	C	G	C	A	G	A	G	G	C	T
3R	-	3R-14489566	FBti0058031	EPgy2	GCTTATAT	TTGGCTTATATGAA		T	T	G	G	C	T	T	A	T	A	T	G	A	A
3R	-	3R-14566150	FBti0057643	EPgy2	CTTCAACG	AAACTTCAACGTTT		A	A	A	C	T	T	C	A	A	C	G	T	T	T
3R	-	3R-14569280	FBti0039664	EPgy2	GCCAAGAA	CAGGCCAAGAAGGA		C	A	G	G	C	C	A	A	G	A	A	G	G	A
3R	-	3R-14732484	FBti0027160	EPgy2	CTGCGAAT	CTGCTGCGAATCTT		C	T	G	C	T	G	C	G	A	A	T	C	T	T
3R	-	3R-14739675	FBti0057794	EPgy2	CTTCCACT	ATTCTTCCACTGAG		A	T	T	C	T	T	C	C	A	C	T	G	A	G
3R	-	3R-14920749	FBti0039415	EPgy2	GTTCATGC	GTTGTTCATGCCCT		G	T	T	G	T	T	C	A	T	G	C	C	C	T
3R	-	3R-14973448	FBti0027594	EPgy2	GTTTGTGG	AGTGTTTGTGGCTC		A	G	T	G	T	T	T	G	T	G	G	C	T	C
3R	-	3R-14976672	FBti0038828	EPgy2	AACGGACT	ATCAACGGACTCTT		A	T	C	A	A	C	G	G	A	C	T	C	T	T
3R	-	3R-14979401	FBti0038717	EPgy2	AATTGAGT	TCTAATTGAGTCAT		T	C	T	A	A	T	T	G	A	G	T	C	A	T
3R	-	3R-15005968	FBti0024839	EPgy2	CGCGCGCT	AGACGCGCGCTGCT		A	G	A	C	G	C	G	C	G	C	T	G	C	T
3R	-	3R-15151953	FBti0039915	EPgy2	GCACGAAG	AACGCACGAAGCGT		A	A	C	G	C	A	C	G	A	A	G	C	G	T
3R	-	3R-15206827	FBti0040098	EPgy2	GCGTGAAC	TCGGCGTGAACGCA		T	C	G	G	C	G	T	G	A	A	C	G	C	A
3R	-	3R-15467100	FBti0039794	EPgy2	AGCTAGCT	ATCAGCTAGCTCTA		A	T	C	A	G	C	T	A	G	C	T	C	T	A
3R	-	3R-15469816	FBti0076024	EPgy2	GTGACAAG	AGTGTGACAAGTGA		A	G	T	G	T	G	A	C	A	A	G	T	G	A
3R	-	3R-15474148	FBti0025270	EPgy2	ACATTCCG	AGAACATTCCGTTC		A	G	A	A	C	A	T	T	C	C	G	T	T	C
3R	-	3R-15662787	FBti0040283	EPgy2	AGCGGCAT	AGCAGCGGCATCTT		A	G	C	A	G	C	G	G	C	A	T	C	T	T
3R	-	3R-15700950	FBti0039609	EPgy2	ACTCCGCC	ACAACTCCGCCCAA		A	C	A	A	C	T	C	C	G	C	C	C	A	A
3R	-	3R-15731101	FBti0027350	EPgy2	ACCCCTAT	ACTACCCCTATCAT		A	C	T	A	C	C	C	C	T	A	T	C	A	T
3R	-	3R-15857620	FBti0039633	EPgy2	GCTCAACA	TCGGCTCAACACTT		T	C	G	G	C	T	C	A	A	C	A	C	T	T
3R	-	3R-16118715	FBti0038988	EPgy2	GTCCCATC	AGCGTCCCATCCCA		A	G	C	G	T	C	C	C	A	T	C	C	C	A
3R	-	3R-16370871	FBti0057890	EPgy2	TTTCATGC	TCATTTCATGCTGA		T	C	A	T	T	T	C	A	T	G	C	T	G	A
3R	-	3R-16375559	FBti0040110	EPgy2	ATGTGCGC	AATATGTGCGCTAT		A	A	T	A	T	G	T	G	C	G	C	T	A	T
3R	-	3R-16383354	FBti0057636	EPgy2	CGTCGGCC	ATCCGTCGGCCTTT		A	T	C	C	G	T	C	G	G	C	C	T	T	T
3R	-	3R-16414049	FBti0039264	EPgy2	GACGAACT	ATAGACGAACTCAA		A	T	A	G	A	C	G	A	A	C	T	C	A	A
3R	-	3R-16460571	FBti0038734	EPgy2	CGGAGTGC	TAACGGAGTGCAGG		T	A	A	C	G	G	A	G	T	G	C	A	G	G
3R	-	3R-16508895	FBti0039523	EPgy2	TACCGTAC	AAGTACCGTACTGT		A	A	G	T	A	C	C	G	T	A	C	T	G	T
3R	-	3R-16579059	FBti0038714	EPgy2	ACCTGAAG	ATCACCTGAAGAGT		A	T	C	A	C	C	T	G	A	A	G	A	G	T
3R	-	3R-16647607	FBti0027203	EPgy2	GACCAAAC	ACCGACCAAACTGA		A	C	C	G	A	C	C	A	A	A	C	T	G	A
3R	-	3R-16647880	FBti0027319	EPgy2	CGCCTGAC	TTCCGCCTGACATT		T	T	C	C	G	C	C	T	G	A	C	A	T	T
3R	-	3R-16649532	FBti0025222	EPgy2	GTTGTGGA	ATTGTTGTGGATTT		A	T	T	G	T	T	G	T	G	G	A	T	T	T
3R	-	3R-16658407	FBti0039392	EPgy2	CCATAAGC	TAGCCATAAGCTTG		T	A	G	C	C	A	T	A	A	G	C	T	T	G
3R	-	3R-16676217	FBti0075974	EPgy2	GGGTCAAG	ATGGGGTCAAGTTT		A	T	G	G	G	G	T	C	A	A	G	T	T	T
3R	-	3R-16775647	FBti0025297	EPgy2	GCTTGAAC	ATGGCTTGAACCGC		A	T	G	G	C	T	T	G	A	A	C	C	G	C
3R	-	3R-16886480	FBti0039898	EPgy2	CCTTAGAG	GAGCCTTAGAGCGA		G	A	G	C	C	T	T	A	G	A	G	C	G	A
3R	-	3R-16890106	FBti0039630	EPgy2	CTTGGGAC	GCACTTGGGACTAA		G	C	A	C	T	T	G	G	G	A	C	T	A	A
3R	-	3R-16923504	FBti0039732	EPgy2	GTTCCATT	ACGGTTCCATTGGT		A	C	G	G	T	T	C	C	A	T	T	G	G	T
3R	-	3R-16953201	FBti0039777	EPgy2	GGTCCAAA	AATGGTCCAAACCA		A	A	T	G	G	T	C	C	A	A	A	C	C	A
3R	-	3R-17054657	FBti0075880	EPgy2	TGCTCGCC	TCGTGCTCGCCGTT		T	C	G	T	G	C	T	C	G	C	C	G	T	T
3R	-	3R-17150181	FBti0039569	EPgy2	GTGAGGGG	ATGGTGAGGGGAAT		A	T	G	G	T	G	A	G	G	G	G	A	A	T
3R	-	3R-17152358	FBti0039324	EPgy2	ATATGTAG	CTGATATGTAGAAA		C	T	G	A	T	A	T	G	T	A	G	A	A	A
3R	-	3R-17175340	FBti0039642	EPgy2	CGCTACCC	GGGCGCTACCCGAT		G	G	G	C	G	C	T	A	C	C	C	G	A	T
3R	-	3R-17431542	FBti0025149	EPgy2	TTCTGGTG	CTCTTCTGGTGGTT		C	T	C	T	T	C	T	G	G	T	G	G	T	T
3R	-	3R-17458555	FBti0039710	EPgy2	CGCTGTAC	ATTCGCTGTACAAA		A	T	T	C	G	C	T	G	T	A	C	A	A	A
3R	-	3R-17464381	FBti0039537	EPgy2	GCGTAAAT	ATGGCGTAAATTTG		A	T	G	G	C	G	T	A	A	A	T	T	T	G
3R	-	3R-17486707	FBti0038701	EPgy2	GGCCGAGC	ACTGGCCGAGCATC		A	C	T	G	G	C	C	G	A	G	C	A	T	C
3R	-	3R-17648179	FBti0039403	EPgy2	TTTTGACC	ATGTTTTGACCCCT		A	T	G	T	T	T	T	G	A	C	C	C	C	T
3R	-	3R-17660413	FBti0057667	EPgy2	GTCCCATC	TCAGTCCCATCTTC		T	C	A	G	T	C	C	C	A	T	C	T	T	C
3R	-	3R-17676490	FBti0039385	EPgy2	GACTGGCG	AAAGACTGGCGAGA		A	A	A	G	A	C	T	G	G	C	G	A	G	A
3R	-	3R-17676710	FBti0076045	EPgy2	AACAGCGT	AGCAACAGCGTGAA		A	G	C	A	A	C	A	G	C	G	T	G	A	A
3R	-	3R-17701018	FBti0038987	EPgy2	GTCCGACT	TTCGTCCGACTGCT		T	T	C	G	T	C	C	G	A	C	T	G	C	T
3R	-	3R-17748855	FBti0039452	EPgy2	ATTTACAG	TACATTTACAGTTT		T	A	C	A	T	T	T	A	C	A	G	T	T	T
3R	-	3R-17853375	FBti0075961	EPgy2	CCGTCTGC	CACCCGTCTGCTCG		C	A	C	C	C	G	T	C	T	G	C	T	C	G
3R	-	3R-17965658	FBti0039389	EPgy2	GCACAGAC	GAGGCACAGACGAT		G	A	G	G	C	A	C	A	G	A	C	G	A	T
3R	-	3R-18031320	FBti0038884	EPgy2	GACGGGCG	ACCGACGGGCGCTT		A	C	C	G	A	C	G	G	G	C	G	C	T	T
3R	-	3R-18188257	FBti0039416	EPgy2	CGCCCGCT	AATCGCCCGCTGGT		A	A	T	C	G	C	C	C	G	C	T	G	G	T
3R	-	3R-18194462	FBti0040105	EPgy2	GTCTGGAA	TTGGTCTGGAATAA		T	T	G	G	T	C	T	G	G	A	A	T	A	A
3R	-	3R-18250487	FBti0039843	EPgy2	CTCTGCTC	TTGCTCTGCTCCTC		T	T	G	C	T	C	T	G	C	T	C	C	T	C
3R	-	3R-18413458	FBti0025175	EPgy2	GAGCGAAC	ATAGAGCGAACTCG		A	T	A	G	A	G	C	G	A	A	C	T	C	G
3R	-	3R-18490544	FBti0033150	EPgy2	GGCTGGCC	ATCGGCTGGCCGCT		A	T	C	G	G	C	T	G	G	C	C	G	C	T
3R	-	3R-18512184	FBti0058004	EPgy2	CGTCCAAC	ATGCGTCCAACGAT		A	T	G	C	G	T	C	C	A	A	C	G	A	T
3R	-	3R-18524053	FBti0033280	EPgy2	AAAAAACA	AACAAAAAACATCA		A	A	C	A	A	A	A	A	A	C	A	T	C	A
3R	-	3R-18576554	FBti0038974	EPgy2	GGTTCGTG	TTGGGTTCGTGGCT		T	T	G	G	G	T	T	C	G	T	G	G	C	T
3R	-	3R-18983186	FBti0027267	EPgy2	GGATGCGT	ATCGGATGCGTGTT		A	T	C	G	G	A	T	G	C	G	T	G	T	T
3R	-	3R-18999741	FBti0075904	EPgy2	GCTCAGCT	AGGGCTCAGCTGAT		A	G	G	G	C	T	C	A	G	C	T	G	A	T
3R	-	3R-19047687	FBti0038862	EPgy2	GGGCCAGC	TCAGGGCCAGCATC		T	C	A	G	G	G	C	C	A	G	C	A	T	C
3R	-	3R-19047691	FBti0039530	EPgy2	CAAGACCA	GAGCAAGACCAAGG		G	A	G	C	A	A	G	A	C	C	A	A	G	G
3R	-	3R-19104905	FBti0039943	EPgy2	CCCATGGC	TCGCCCATGGCTTT		T	C	G	C	C	C	A	T	G	G	C	T	T	T
3R	-	3R-19173348	FBti0039219	EPgy2	GGCTGGGG	TGAGGCTGGGGATT		T	G	A	G	G	C	T	G	G	G	G	A	T	T
3R	-	3R-19181762	FBti0075455	EPgy2	ACCTGAAG	TGCACCTGAAGTTT		T	G	C	A	C	C	T	G	A	A	G	T	T	T
3R	-	3R-19182246	FBti0039567	EPgy2	GATTGGAT	CAAGATTGGATGCA		C	A	A	G	A	T	T	G	G	A	T	G	C	A
3R	-	3R-19427387	FBti0039120	EPgy2	GTCAGCCT	AATGTCAGCCTCCA		A	A	T	G	T	C	A	G	C	C	T	C	C	A
3R	-	3R-19505923	FBti0040089	EPgy2	GCCGCGCG	TAAGCCGCGCGTAA		T	A	A	G	C	C	G	C	G	C	G	T	A	A
3R	-	3R-19555901	FBti0038843	EPgy2	GGCGGCTT	TTTGGCGGCTTTTT		T	T	T	G	G	C	G	G	C	T	T	T	T	T
3R	-	3R-19586290	FBti0025151	EPgy2	ATACACAT	AACATACACATACA		A	A	C	A	T	A	C	A	C	A	T	A	C	A
3R	-	3R-19599885	FBti0039164	EPgy2	CACTAGGC	AGCCACTAGGCCAG		A	G	C	C	A	C	T	A	G	G	C	C	A	G
3R	-	3R-19712343	FBti0076091	EPgy2	GGTGTGGC	GCCGGTGTGGCTTT		G	C	C	G	G	T	G	T	G	G	C	T	T	T
3R	-	3R-19715799	FBti0039899	EPgy2	AGCACGCC	AGGAGCACGCCTTT		A	G	G	A	G	C	A	C	G	C	C	T	T	T
3R	-	3R-19747869	FBti0076109	EPgy2	CTCCGGTT	TGTCTCCGGTTTAT		T	G	T	C	T	C	C	G	G	T	T	T	A	T
3R	-	3R-19748722	FBti0076094	EPgy2	GGCCACTT	TGGGGCCACTTCAT		T	G	G	G	G	C	C	A	C	T	T	C	A	T
3R	-	3R-19757429	FBti0038832	EPgy2	GTGGGGGC	AGTGTGGGGGCTAG		A	G	T	G	T	G	G	G	G	G	C	T	A	G
3R	-	3R-19759183	FBti0024876	EPgy2	ATGAGGTC	ATGATGAGGTCATA		A	T	G	A	T	G	A	G	G	T	C	A	T	A
3R	-	3R-19766196	FBti0040068	EPgy2	TCCCAAGT	ATCTCCCAAGTTCA		A	T	C	T	C	C	C	A	A	G	T	T	C	A
3R	-	3R-19784073	FBti0039655	EPgy2	CGGCTACT	AGCCGGCTACTGAC		A	G	C	C	G	G	C	T	A	C	T	G	A	C
3R	-	3R-19818844	FBti0057597	EPgy2	GTGTAGGT	CCGGTGTAGGTCTT		C	C	G	G	T	G	T	A	G	G	T	C	T	T
3R	-	3R-19821760	FBti0039186	EPgy2	GGCTGGCG	GCAGGCTGGCGAAC		G	C	A	G	G	C	T	G	G	C	G	A	A	C
3R	-	3R-19857108	FBti0057725	EPgy2	AGCTGGGT	ATTAGCTGGGTTTT		A	T	T	A	G	C	T	G	G	G	T	T	T	T
3R	-	3R-19873961	FBti0033159	EPgy2	ACCAAGAC	CGAACCAAGACCGA		C	G	A	A	C	C	A	A	G	A	C	C	G	A
3R	-	3R-19931495	FBti0039755	EPgy2	GTGGTGGT	ATAGTGGTGGTGGT		A	T	A	G	T	G	G	T	G	G	T	G	G	T
3R	-	3R-19987210	FBti0076082	EPgy2	TTTAAGAC	TACTTTAAGACTAA		T	A	C	T	T	T	A	A	G	A	C	T	A	A
3R	-	3R-19987825	FBti0039522	EPgy2	CTCAAGTA	ATTCTCAAGTAGGT		A	T	T	C	T	C	A	A	G	T	A	G	G	T
3R	-	3R-19989258	FBti0038900	EPgy2	AGTTTACG	CTGAGTTTACGATC		C	T	G	A	G	T	T	T	A	C	G	A	T	C
3R	-	3R-20019155	FBti0027224	EPgy2	CGCTGGCG	AACCGCTGGCGGCG		A	A	C	C	G	C	T	G	G	C	G	G	C	G
3R	-	3R-20019626	FBti0033189	EPgy2	AGTGAGAG	GAGAGTGAGAGTGC		G	A	G	A	G	T	G	A	G	A	G	T	G	C
3R	-	3R-20046758	FBti0033157	EPgy2	GGGCCTAT	TTGGGGCCTATTTT		T	T	G	G	G	G	C	C	T	A	T	T	T	T
3R	-	3R-20056637	FBti0057826	EPgy2	GCCACGAC	GCGGCCACGACGAC		G	C	G	G	C	C	A	C	G	A	C	G	A	C
3R	-	3R-20098957	FBti0027397	EPgy2	ACCCGCAG	TTCACCCGCAGCAT		T	T	C	A	C	C	C	G	C	A	G	C	A	T
3R	-	3R-20115939	FBti0040161	EPgy2	CTCCGCAG	AGCCTCCGCAGTCG		A	G	C	C	T	C	C	G	C	A	G	T	C	G
3R	-	3R-20144181	FBti0038824	EPgy2	GGTTGAGC	TTGGGTTGAGCCAA		T	T	G	G	G	T	T	G	A	G	C	C	A	A
3R	-	3R-20159018	FBti0033365	EPgy2	CGCCGCGA	ATACGCCGCGATGT		A	T	A	C	G	C	C	G	C	G	A	T	G	T
3R	-	3R-20271563	FBti0040100	EPgy2	GCTGGGCC	TGTGCTGGGCCAAA		T	G	T	G	C	T	G	G	G	C	C	A	A	A
3R	-	3R-20365621	FBti0057872	EPgy2	ATGACGAC	ACGATGACGACGTT		A	C	G	A	T	G	A	C	G	A	C	G	T	T
3R	-	3R-20448650	FBti0057972	EPgy2	TCCGAGGC	TTGTCCGAGGCCAT		T	T	G	T	C	C	G	A	G	G	C	C	A	T
3R	-	3R-20476899	FBti0027270	EPgy2	GGAAAGGT	GTGGGAAAGGTACG		G	T	G	G	G	A	A	A	G	G	T	A	C	G
3R	-	3R-20485416	FBti0076148	EPgy2	CCCCGAAG	AGCCCCCGAAGTCA		A	G	C	C	C	C	C	G	A	A	G	T	C	A
3R	-	3R-20487497	FBti0033158	EPgy2	CTCCCCAC	TCGCTCCCCACCAC		T	C	G	C	T	C	C	C	C	A	C	C	A	C
3R	-	3R-20542961	FBti0057865	EPgy2	GCGAAACC	AAGGCGAAACCTGT		A	A	G	G	C	G	A	A	A	C	C	T	G	T
3R	-	3R-20630954	FBti0058037	EPgy2	AATAGTTT	AAAAATAGTTTCAC		A	A	A	A	A	T	A	G	T	T	T	C	A	C
3R	-	3R-20639716	FBti0039303	EPgy2	AGCCCAGT	TTGAGCCCAGTCTC		T	T	G	A	G	C	C	C	A	G	T	C	T	C
3R	-	3R-20696563	FBti0039746	EPgy2	GATGGAGA	AAAGATGGAGAGTT		A	A	A	G	A	T	G	G	A	G	A	G	T	T
3R	-	3R-20702021	FBti0027390	EPgy2	CTGGCACC	TCCCTGGCACCCAC		T	C	C	C	T	G	G	C	A	C	C	C	A	C
3R	-	3R-20770945	FBti0039198	EPgy2	ATCTACAG	AGGATCTACAGTTT		A	G	G	A	T	C	T	A	C	A	G	T	T	T
3R	-	3R-20830350	FBti0039141	EPgy2	GTTTGAAC	ATGGTTTGAACGTA		A	T	G	G	T	T	T	G	A	A	C	G	T	A
3R	-	3R-20850990	FBti0033147	EPgy2	TTGAGGCG	GTGTTGAGGCGTCG		G	T	G	T	T	G	A	G	G	C	G	T	C	G
3R	-	3R-20957502	FBti0075830	EPgy2	ACACAACG	AATACACAACGATA		A	A	T	A	C	A	C	A	A	C	G	A	T	A
3R	-	3R-21010507	FBti0076150	EPgy2	TTCATTTT	CTTTTCATTTTGGC		C	T	T	T	T	C	A	T	T	T	T	G	G	C
3R	-	3R-21128160	FBti0076007	EPgy2	CACGCGAC	ACACACGCGACTTT		A	C	A	C	A	C	G	C	G	A	C	T	T	T
3R	-	3R-21129827	FBti0027069	EPgy2	CCCGGCAG	TAACCCGGCAGTCG		T	A	A	C	C	C	G	G	C	A	G	T	C	G
3R	-	3R-21155073	FBti0039842	EPgy2	GTCTTGGC	AGAGTCTTGGCGCT		A	G	A	G	T	C	T	T	G	G	C	G	C	T
3R	-	3R-21156987	FBti0057852	EPgy2	TCTTTACC	TTCTCTTTACCCAA		T	T	C	T	C	T	T	T	A	C	C	C	A	A
3R	-	3R-21450383	FBti0039258	EPgy2	GTGTCCCG	TAAGTGTCCCGTGT		T	A	A	G	T	G	T	C	C	C	G	T	G	T
3R	-	3R-21524554	FBti0038761	EPgy2	CCATGGCG	ACACCATGGCGCTA		A	C	A	C	C	A	T	G	G	C	G	C	T	A
3R	-	3R-21566232	FBti0057797	EPgy2	GCTTGTAG	ATTGCTTGTAGCGT		A	T	T	G	C	T	T	G	T	A	G	C	G	T
3R	-	3R-21707093	FBti0039127	EPgy2	GAGTGAGC	ATCGAGTGAGCAGT		A	T	C	G	A	G	T	G	A	G	C	A	G	T
3R	-	3R-21707813	FBti0039375	EPgy2	ATTCGGTG	TGCATTCGGTGCAA		T	G	C	A	T	T	C	G	G	T	G	C	A	A
3R	-	3R-21710436	FBti0075456	EPgy2	ATTCCGAC	GCGATTCCGACCCT		G	C	G	A	T	T	C	C	G	A	C	C	C	T
3R	-	3R-21822677	FBti0027266	EPgy2	GGAGCAAC	TGGGGAGCAACCGA		T	G	G	G	G	A	G	C	A	A	C	C	G	A
3R	-	3R-21823179	FBti0057847	EPgy2	CAGTCAGC	TTTCAGTCAGCAGA		T	T	T	C	A	G	T	C	A	G	C	A	G	A
3R	-	3R-21881070	FBti0039555	EPgy2	GTTCGAGA	TAGGTTCGAGAGGA		T	A	G	G	T	T	C	G	A	G	A	G	G	A
3R	-	3R-22540234	FBti0039801	EPgy2	ACATTGCC	TTAACATTGCCTAT		T	T	A	A	C	A	T	T	G	C	C	T	A	T
3R	-	3R-22741454	FBti0039611	EPgy2	AGGCAGCC	GGTAGGCAGCCCAA		G	G	T	A	G	G	C	A	G	C	C	C	A	A
3R	-	3R-22750415	FBti0038074	EPgy2	AACCACCC	CATAACCACCCCAA		C	A	T	A	A	C	C	A	C	C	C	C	A	A
3R	-	3R-22916934	FBti0075991	EPgy2	GTACCTTG	TGTGTACCTTGTTT		T	G	T	G	T	A	C	C	T	T	G	T	T	T
3R	-	3R-23071266	FBti0039439	EPgy2	GTTTGCAC	TCTGTTTGCACTGG		T	C	T	G	T	T	T	G	C	A	C	T	G	G
3R	-	3R-23089348	FBti0076136	EPgy2	GTCCAATG	CTCGTCCAATGGAA		C	T	C	G	T	C	C	A	A	T	G	G	A	A
3R	-	3R-23089771	FBti0039177	EPgy2	GTTTAGAC	CGTGTTTAGACGCA		C	G	T	G	T	T	T	A	G	A	C	G	C	A
3R	-	3R-23109549	FBti0075865	EPgy2	CATCAGGC	TATCATCAGGCTAT		T	A	T	C	A	T	C	A	G	G	C	T	A	T
3R	-	3R-23433868	FBti0027371	EPgy2	GCCCAGTG	TTTGCCCAGTGTTT		T	T	T	G	C	C	C	A	G	T	G	T	T	T
3R	-	3R-23507761	FBti0038971	EPgy2	GACTGGTC	TCGGACTGGTCGAG		T	C	G	G	A	C	T	G	G	T	C	G	A	G
3R	-	3R-23511151	FBti0033283	EPgy2	CGCAAAGC	TAGCGCAAAGCTGT		T	A	G	C	G	C	A	A	A	G	C	T	G	T
3R	-	3R-23773691	FBti0039825	EPgy2	GCTCTGTA	AACGCTCTGTATTT		A	A	C	G	C	T	C	T	G	T	A	T	T	T
3R	-	3R-24170774	FBti0039301	EPgy2	CGTGGGCG	ATACGTGGGCGGCA		A	T	A	C	G	T	G	G	G	C	G	G	C	A
3R	-	3R-24460793	FBti0039003	EPgy2	GGTTAAGC	AAGGGTTAAGCCAT		A	A	G	G	G	T	T	A	A	G	C	C	A	T
3R	-	3R-24631904	FBti0075876	EPgy2	GAGCGACC	ACTGAGCGACCCTC		A	C	T	G	A	G	C	G	A	C	C	C	T	C
3R	-	3R-24646322	FBti0039246	EPgy2	GCCGAGAG	AGCGCCGAGAGAGT		A	G	C	G	C	C	G	A	G	A	G	A	G	T
3R	-	3R-24657721	FBti0038727	EPgy2	GCACTCTC	TGTGCACTCTCCAA		T	G	T	G	C	A	C	T	C	T	C	C	A	A
3R	-	3R-24670974	FBti0038863	EPgy2	CTCCAAAC	ACTCTCCAAACGTT		A	C	T	C	T	C	C	A	A	A	C	G	T	T
3R	-	3R-24713227	FBti0038834	EPgy2	CCCTGAAA	CTACCCTGAAAGTA		C	T	A	C	C	C	T	G	A	A	A	G	T	A
3R	-	3R-24796192	FBti0027164	EPgy2	AGGGGAGC	AATAGGGGAGCAAT		A	A	T	A	G	G	G	G	A	G	C	A	A	T
3R	-	3R-24864748	FBti0057868	EPgy2	GCGCGCCA	GAGGCGCGCCATTC		G	A	G	G	C	G	C	G	C	C	A	T	T	C
3R	-	3R-24888688	FBti0039107	EPgy2	GGATAAGC	TAAGGATAAGCAAA		T	A	A	G	G	A	T	A	A	G	C	A	A	A
3R	-	3R-24912726	FBti0039247	EPgy2	CGGCGGAT	GAGCGGCGGATATT		G	A	G	C	G	G	C	G	G	A	T	A	T	T
3R	-	3R-25081302	FBti0040279	EPgy2	ATGTCAAC	ATTATGTCAACGAT		A	T	T	A	T	G	T	C	A	A	C	G	A	T
3R	-	3R-25304991	FBti0039519	EPgy2	GCTTTGCC	TTTGCTTTGCCAGC		T	T	T	G	C	T	T	T	G	C	C	A	G	C
3R	-	3R-25316579	FBti0040141	EPgy2	GGTAGGTG	ATGGGTAGGTGGGT		A	T	G	G	G	T	A	G	G	T	G	G	G	T
3R	-	3R-25319104	FBti0076048	EPgy2	AGCCGGCA	AGTAGCCGGCACAT		A	G	T	A	G	C	C	G	G	C	A	C	A	T
3R	-	3R-25501299	FBti0075832	EPgy2	ATTCAGCA	AGCATTCAGCATAT		A	G	C	A	T	T	C	A	G	C	A	T	A	T
3R	-	3R-25603765	FBti0024911	EPgy2	GGTTGGGT	TTGGGTTGGGTAAT		T	T	G	G	G	T	T	G	G	G	T	A	A	T
3R	-	3R-25608248	FBti0039517	EPgy2	CTCTGGCC	AGCCTCTGGCCTCT		A	G	C	C	T	C	T	G	G	C	C	T	C	T
3R	-	3R-25632473	FBti0039684	EPgy2	GTTTTGGT	TCGGTTTTGGTTTT		T	C	G	G	T	T	T	T	G	G	T	T	T	T
3R	-	3R-25759999	FBti0075889	EPgy2	CGGCAGGC	TTGCGGCAGGCAAT		T	T	G	C	G	G	C	A	G	G	C	A	A	T
3R	-	3R-25761581	FBti0039163	EPgy2	ACATGGCC	AAAACATGGCCCAT		A	A	A	A	C	A	T	G	G	C	C	C	A	T
3R	-	3R-25830439	FBti0076029	EPgy2	CACCCACC	TTACACCCACCCAT		T	T	A	C	A	C	C	C	A	C	C	C	A	T
3R	-	3R-25830935	FBti0033256	EPgy2	GTGTGGGG	AGAGTGTGGGGATC		A	G	A	G	T	G	T	G	G	G	G	A	T	C
3R	-	3R-25840895	FBti0027220	EPgy2	ACTTCGAC	TCGACTTCGACTGC		T	C	G	A	C	T	T	C	G	A	C	T	G	C
3R	-	3R-25865503	FBti0033319	EPgy2	GGTCGGCC	AACGGTCGGCCATA		A	A	C	G	G	T	C	G	G	C	C	A	T	A
3R	-	3R-25869066	FBti0033252	EPgy2	AGCTAGTC	AAGAGCTAGTCTAT		A	A	G	A	G	C	T	A	G	T	C	T	A	T
3R	-	3R-25872657	FBti0024120	EPgy2	ATCGGGAG	ATCATCGGGAGCGC		A	T	C	A	T	C	G	G	G	A	G	C	G	C
3R	-	3R-25960033	FBti0057666	EPgy2	AGCTCGCT	ATCAGCTCGCTTTT		A	T	C	A	G	C	T	C	G	C	T	T	T	T
3R	-	3R-25986239	FBti0039007	EPgy2	GTTTGTCT	TCAGTTTGTCTTGA		T	C	A	G	T	T	T	G	T	C	T	T	G	A
3R	-	3R-25996956	FBti0076141	EPgy2	GTCTCGAG	TTTGTCTCGAGTGC		T	T	T	G	T	C	T	C	G	A	G	T	G	C
3R	-	3R-26028756	FBti0076051	EPgy2	CTTCGCTC	TCACTTCGCTCCTT		T	C	A	C	T	T	C	G	C	T	C	C	T	T
3R	-	3R-26168437	FBti0038695	EPgy2	AGCTATAT	ACGAGCTATATGAA		A	C	G	A	G	C	T	A	T	A	T	G	A	A
3R	-	3R-26173267	FBti0025264	EPgy2	GGTCAGCC	ATCGGTCAGCCCTT		A	T	C	G	G	T	C	A	G	C	C	C	T	T
3R	-	3R-26253850	FBti0025248	EPgy2	GCATGGTC	AGTGCATGGTCTCT		A	G	T	G	C	A	T	G	G	T	C	T	C	T
3R	-	3R-26426148	FBti0039133	EPgy2	TGGCGCCC	TTGTGGCGCCCAAA		T	T	G	T	G	G	C	G	C	C	C	A	A	A
3R	-	3R-26884285	FBti0039674	EPgy2	GCTGAGCC	GCAGCTGAGCCTAT		G	C	A	G	C	T	G	A	G	C	C	T	A	T
3R	-	3R-27046861	FBti0027101	EPgy2	GCTGCTCT	AATGCTGCTCTGCA		A	A	T	G	C	T	G	C	T	C	T	G	C	A
3R	-	3R-27230993	FBti0039782	EPgy2	GGCCGGTG	AATGGCCGGTGTTT		A	A	T	G	G	C	C	G	G	T	G	T	T	T
3R	-	3R-27406457	FBti0039855	EPgy2	GTCTCGTC	ATAGTCTCGTCGCT		A	T	A	G	T	C	T	C	G	T	C	G	C	T
3R	-	3R-27421371	FBti0033149	EPgy2	GTCTGGCA	GTCGTCTGGCATAT		G	T	C	G	T	C	T	G	G	C	A	T	A	T
3R	-	3R-27435599	FBti0027167	EPgy2	TCTTAAGG	CTTTCTTAAGGTCG		C	T	T	T	C	T	T	A	A	G	G	T	C	G
3R	-	3R-27502139	FBti0025171	EPgy2	GCCTCGCG	ATCGCCTCGCGTTT		A	T	C	G	C	C	T	C	G	C	G	T	T	T
3R	-	3R-27565281	FBti0025208	EPgy2	CTTTGCTT	TTCCTTTGCTTCCT		T	T	C	C	T	T	T	G	C	T	T	C	C	T
3R	-	3R-27567349	FBti0075919	EPgy2	AGTGCAGC	CCAAGTGCAGCCGG		C	C	A	A	G	T	G	C	A	G	C	C	G	G
3R	-	3R-27602266	FBti0027155	EPgy2	AGCCCGCG	TATAGCCCGCGCTC		T	A	T	A	G	C	C	C	G	C	G	C	T	C
3R	-	3R-27638027	FBti0024098	EPgy2	CTGCAGCA	TCTCTGCAGCATGT		T	C	T	C	T	G	C	A	G	C	A	T	G	T
3R	-	3R-27811479	FBti0025144	EPgy2	CGCACGAC	TGCCGCACGACGAC		T	G	C	C	G	C	A	C	G	A	C	G	A	C
3R	-	3R-27841330	FBti0027193	EPgy2	GCGCTGGC	ACAGCGCTGGCGCT		A	C	A	G	C	G	C	T	G	G	C	G	C	T
3R	-	3R-27866287	FBti0039353	EPgy2	AGTGCGGG	GTGAGTGCGGGAGT		G	T	G	A	G	T	G	C	G	G	G	A	G	T
3R	-	3R-27887201	FBti0027181	EPgy2	TTTGGCGT	TGGTTTGGCGTCAG		T	G	G	T	T	T	G	G	C	G	T	C	A	G
4	-	4-467733	FBti0039417	EPgy2	CCTCATAC	ACTCCTCATACATT		A	C	T	C	C	T	C	A	T	A	C	A	T	T
4	-	4-627676	FBti0100383	EPgy2	TTTTTGTC	GTCTTTTTGTCTTT		G	T	C	T	T	T	T	T	G	T	C	T	T	T
4	-	4-928615	FBti0039573	EPgy2	GCTCAATG	TTTGCTCAATGTCA		T	T	T	G	C	T	C	A	A	T	G	T	C	A
4	-	4-1047540	FBti0075440	EPgy2	GTTTGTAC	AAAGTTTGTACCTT		A	A	A	G	T	T	T	G	T	A	C	C	T	T
4	-	4-1071948	FBti0100357	EPgy2	AGCAGCCT	TTAAGCAGCCTGTT		T	T	A	A	G	C	A	G	C	C	T	G	T	T
X	-	X-72390	FBti0038719	EPgy2	GTTTCGCA	TGAGTTTCGCATCG		T	G	A	G	T	T	T	C	G	C	A	T	C	G
X	-	X-159935	FBti0039616	EPgy2	CTCTAGAA	AGCCTCTAGAAGTT		A	G	C	C	T	C	T	A	G	A	A	G	T	T
X	-	X-170369	FBti0027358	EPgy2	CCCCAAAA	CTGCCCCAAAAGAA		C	T	G	C	C	C	C	A	A	A	A	G	A	A
X	-	X-189028	FBti0033188	EPgy2	CGATGCCC	ATGCGATGCCCCAA		A	T	G	C	G	A	T	G	C	C	C	C	A	A
X	-	X-241101	FBti0057830	EPgy2	CTGCAGCC	TCTCTGCAGCCAAA		T	C	T	C	T	G	C	A	G	C	C	A	A	A
X	-	X-242892	FBti0033300	EPgy2	GAGCGAGA	TTGGAGCGAGAGTT		T	T	G	G	A	G	C	G	A	G	A	G	T	T
X	-	X-322332	FBti0057982	EPgy2	ACCTGAAC	GTAACCTGAACCTT		G	T	A	A	C	C	T	G	A	A	C	C	T	T
X	-	X-331781	FBti0077804	EPgy2	CTTCGGCG	TGGCTTCGGCGGCT		T	G	G	C	T	T	C	G	G	C	G	G	C	T
X	-	X-366272	FBti0039342	EPgy2	GTTTCGGC	TCGGTTTCGGCTGT		T	C	G	G	T	T	T	C	G	G	C	T	G	T
X	-	X-373260	FBti0039620	EPgy2	GACTGGTA	AAAGACTGGTAATA		A	A	A	G	A	C	T	G	G	T	A	A	T	A
X	-	X-417226	FBti0039579	EPgy2	CTTTGGCG	CCTCTTTGGCGGCA		C	C	T	C	T	T	T	G	G	C	G	G	C	A
X	-	X-423959	FBti0076078	EPgy2	GCCCAGTT	TCGGCCCAGTTCAG		T	C	G	G	C	C	C	A	G	T	T	C	A	G
X	-	X-511484	FBti0027235	EPgy2	AGCGAGCA	TTCAGCGAGCAGCA		T	T	C	A	G	C	G	A	G	C	A	G	C	A
X	-	X-529491	FBti0039533	EPgy2	CTTTGCCT	TTGCTTTGCCTGAT		T	T	G	C	T	T	T	G	C	C	T	G	A	T
X	-	X-549666	FBti0039449	EPgy2	GTTATGAC	TTGGTTATGACTCA		T	T	G	G	T	T	A	T	G	A	C	T	C	A
X	-	X-687173	FBti0027298	EPgy2	TTTGGTGC	GGATTTGGTGCTCT		G	G	A	T	T	T	G	G	T	G	C	T	C	T
X	-	X-705709	FBti0038745	EPgy2	GATGCAAC	AGGGATGCAACGAT		A	G	G	G	A	T	G	C	A	A	C	G	A	T
X	-	X-821674	FBti0039816	EPgy2	CTCCCCAG	AAACTCCCCAGAAA		A	A	A	C	T	C	C	C	C	A	G	A	A	A
X	-	X-904410	FBti0033296	EPgy2	GGTTTGCC	ACTGGTTTGCCCGA		A	C	T	G	G	T	T	T	G	C	C	C	G	A
X	-	X-907691	FBti0038943	EPgy2	ATGGGGCT	CTTATGGGGCTTTT		C	T	T	A	T	G	G	G	G	C	T	T	T	T
X	-	X-916911	FBti0033219	EPgy2	GCCTTATC	GTCGCCTTATCGGT		G	T	C	G	C	C	T	T	A	T	C	G	G	T
X	-	X-924629	FBti0040255	EPgy2	AGCTGTTC	AACAGCTGTTCGCT		A	A	C	A	G	C	T	G	T	T	C	G	C	T
X	-	X-935770	FBti0027206	EPgy2	GACGACAC	AAAGACGACACTTT		A	A	A	G	A	C	G	A	C	A	C	T	T	T
X	-	X-1059930	FBti0039562	EPgy2	CCACAGCT	AGTCCACAGCTAAA		A	G	T	C	C	A	C	A	G	C	T	A	A	A
X	-	X-1236327	FBti0039638	EPgy2	GACTGCTC	TTTGACTGCTCCAT		T	T	T	G	A	C	T	G	C	T	C	C	A	T
X	-	X-1265100	FBti0057763	EPgy2	ATCGAGGT	AGAATCGAGGTTTT		A	G	A	A	T	C	G	A	G	G	T	T	T	T
X	-	X-1349044	FBti0027110	EPgy2	ACTTGGAG	AAAACTTGGAGTAG		A	A	A	A	C	T	T	G	G	A	G	T	A	G
X	-	X-1370728	FBti0039244	EPgy2	AGCTGTTG	AGCAGCTGTTGTGA		A	G	C	A	G	C	T	G	T	T	G	T	G	A
X	-	X-1377592	FBti0027195	EPgy2	GCCGGCTT	TTAGCCGGCTTAAT		T	T	A	G	C	C	G	G	C	T	T	A	A	T
X	-	X-1563328	FBti0027218	EPgy2	CTACGGGG	ACCCTACGGGGTAA		A	C	C	C	T	A	C	G	G	G	G	T	A	A
X	-	X-1563574	FBti0038805	EPgy2	GCCTGTTC	ACAGCCTGTTCTGT		A	C	A	G	C	C	T	G	T	T	C	T	G	T
X	-	X-1718931	FBti0025277	EPgy2	CGTCAGCT	AGTCGTCAGCTGTT		A	G	T	C	G	T	C	A	G	C	T	G	T	T
X	-	X-1741762	FBti0075984	EPgy2	GGCGGATG	TCAGGCGGATGAGT		T	C	A	G	G	C	G	G	A	T	G	A	G	T
X	-	X-1775627	FBti0039352	EPgy2	CCGTAGAG	TTGCCGTAGAGTTT		T	T	G	C	C	G	T	A	G	A	G	T	T	T
X	-	X-1912488	FBti0027365	EPgy2	CTTTGCCG	TTACTTTGCCGATT		T	T	A	C	T	T	T	G	C	C	G	A	T	T
X	-	X-1926883	FBti0075853	EPgy2	AGCTGGGT	AAGAGCTGGGTGAA		A	A	G	A	G	C	T	G	G	G	T	G	A	A
X	-	X-1935828	FBti0039836	EPgy2	TTGCAGCG	ATATTGCAGCGTAT		A	T	A	T	T	G	C	A	G	C	G	T	A	T
X	-	X-1959385	FBti0039401	EPgy2	ACCCAGAG	ACGACCCAGAGCAA		A	C	G	A	C	C	C	A	G	A	G	C	A	A
X	-	X-2078953	FBti0027287	EPgy2	ACCTGGGC	TGTACCTGGGCCTA		T	G	T	A	C	C	T	G	G	G	C	C	T	A
X	-	X-2093812	FBti0027369	EPgy2	TATCCACC	ATATATCCACCTTT		A	T	A	T	A	T	C	C	A	C	C	T	T	T
X	-	X-2119315	FBti0025260	EPgy2	GTCTGAGT	AGTGTCTGAGTGCG		A	G	T	G	T	C	T	G	A	G	T	G	C	G
X	-	X-2163491	FBti0027601	EPgy2	CTCACTCA	GCACTCACTCATTC		G	C	A	C	T	C	A	C	T	C	A	T	T	C
X	-	X-2169106	FBti0074639	EPgy2	AGCGAGGG	AAGAGCGAGGGAGC		A	A	G	A	G	C	G	A	G	G	G	A	G	C
X	-	X-2363743	FBti0039975	EPgy2	CTTGGAAC	GCACTTGGAACAAA		G	C	A	C	T	T	G	G	A	A	C	A	A	A
X	-	X-2479397	FBti0027602	EPgy2	CTCTGGGT	TGGCTCTGGGTGCA		T	G	G	C	T	C	T	G	G	G	T	G	C	A
X	-	X-2608494	FBti0075958	EPgy2	GGACAGGG	AGAGGACAGGGGCC		A	G	A	G	G	A	C	A	G	G	G	G	C	C
X	-	X-2621425	FBti0039402	EPgy2	GACTGACG	GGGGACTGACGGCG		G	G	G	G	A	C	T	G	A	C	G	G	C	G
X	-	X-2632607	FBti0039231	EPgy2	CCATAACC	ATCCCATAACCATA		A	T	C	C	C	A	T	A	A	C	C	A	T	A
X	-	X-2683960	FBti0038903	EPgy2	ATCAAAAC	AAAATCAAAACCAA		A	A	A	A	T	C	A	A	A	A	C	C	A	A
X	-	X-2867919	FBti0027343	EPgy2	TCTGGCCT	CGCTCTGGCCTGAC		C	G	C	T	C	T	G	G	C	C	T	G	A	C
X	-	X-3150013	FBti0038783	EPgy2	TGGCCAAG	CAATGGCCAAGCCT		C	A	A	T	G	G	C	C	A	A	G	C	C	T
X	-	X-3183409	FBti0027277	EPgy2	GTTCTATG	TTAGTTCTATGCGC		T	T	A	G	T	T	C	T	A	T	G	C	G	C
X	-	X-3188814	FBti0038810	EPgy2	GCTAGACG	TTGGCTAGACGCCT		T	T	G	G	C	T	A	G	A	C	G	C	C	T
X	-	X-3585169	FBti0027316	EPgy2	CCTCAGAC	CCTCCTCAGACACA		C	C	T	C	C	T	C	A	G	A	C	A	C	A
X	-	X-3636726	FBti0057787	EPgy2	GTCAGGCG	TTAGTCAGGCGATT		T	T	A	G	T	C	A	G	G	C	G	A	T	T
X	-	X-3645528	FBti0076144	EPgy2	CTCTGTCT	CCTCTCTGTCTCTC		C	C	T	C	T	C	T	G	T	C	T	C	T	C
X	-	X-4195745	FBti0027108	EPgy2	TCGAGAAG	AGGTCGAGAAGATA		A	G	G	T	C	G	A	G	A	A	G	A	T	A
X	-	X-4580536	FBti0024917	EPgy2	CTCCCCAC	TTGCTCCCCACCAA		T	T	G	C	T	C	C	C	C	A	C	C	A	A
X	-	X-4815319	FBti0058020	EPgy2	GTTTATAT	ATAGTTTATATTCT		A	T	A	G	T	T	T	A	T	A	T	T	C	T
X	-	X-5313074	FBti0039946	EPgy2	AGCTGTAG	AGCAGCTGTAGAGG		A	G	C	A	G	C	T	G	T	A	G	A	G	G
X	-	X-5532931	FBti0077802	EPgy2	CAGTGGGC	GAACAGTGGGCCAA		G	A	A	C	A	G	T	G	G	G	C	C	A	A
X	-	X-5542523	FBti0057858	EPgy2	AGGGCGCG	GTGAGGGCGCGTGT		G	T	G	A	G	G	G	C	G	C	G	T	G	T
X	-	X-5584066	FBti0039327	EPgy2	CTCTGCCG	ACTCTCTGCCGGCA		A	C	T	C	T	C	T	G	C	C	G	G	C	A
X	-	X-5641042	FBti0039914	EPgy2	GTCCCGCA	TAAGTCCCGCAGCT		T	A	A	G	T	C	C	C	G	C	A	G	C	T
X	-	X-5658274	FBti0057664	EPgy2	AGGTGGAT	GGGAGGTGGATGAC		G	G	G	A	G	G	T	G	G	A	T	G	A	C
X	-	X-5963131	FBti0024921	EPgy2	CATGTCGC	ACACATGTCGCCCC		A	C	A	C	A	T	G	T	C	G	C	C	C	C
X	-	X-6173328	FBti0075863	EPgy2	ATTTGGCT	AGCATTTGGCTATA		A	G	C	A	T	T	T	G	G	C	T	A	T	A
X	-	X-6176130	FBti0033388	EPgy2	ACTTCGTT	GTAACTTCGTTTAG		G	T	A	A	C	T	T	C	G	T	T	T	A	G
X	-	X-6493397	FBti0038077	EPgy2	TTTCAAAG	TATTTTCAAAGTTT		T	A	T	T	T	T	C	A	A	A	G	T	T	T
X	-	X-6563971	FBti0038870	EPgy2	GTGTGAAC	AGTGTGTGAACCGT		A	G	T	G	T	G	T	G	A	A	C	C	G	T
X	-	X-6568029	FBti0025243	EPgy2	ATCTGGCC	TAAATCTGGCCCCA		T	A	A	A	T	C	T	G	G	C	C	C	C	A
X	-	X-6573551	FBti0024870	EPgy2	CTCTCTGT	ACCCTCTCTGTATC		A	C	C	C	T	C	T	C	T	G	T	A	T	C
X	-	X-6582833	FBti0076155	EPgy2	TCCGAGTC	CAGTCCGAGTCCGT		C	A	G	T	C	C	G	A	G	T	C	C	G	T
X	-	X-6718380	FBti0039532	EPgy2	CTGCATGC	ATCCTGCATGCTGA		A	T	C	C	T	G	C	A	T	G	C	T	G	A
X	-	X-6777881	FBti0033213	EPgy2	ATCAAAAG	AAAATCAAAAGCCT		A	A	A	A	T	C	A	A	A	A	G	C	C	T
X	-	X-6804447	FBti0038696	EPgy2	CTTCGGAG	GTTCTTCGGAGGCT		G	T	T	C	T	T	C	G	G	A	G	G	C	T
X	-	X-6862720	FBti0033184	EPgy2	GTCGAGGT	GCGGTCGAGGTGTT		G	C	G	G	T	C	G	A	G	G	T	G	T	T
X	-	X-6986034	FBti0038725	EPgy2	CGATAGCC	ATACGATAGCCCGT		A	T	A	C	G	A	T	A	G	C	C	C	G	T
X	-	X-6999135	FBti0025253	EPgy2	ATATGGAC	ATCATATGGACTCA		A	T	C	A	T	A	T	G	G	A	C	T	C	A
X	-	X-7184863	FBti0075873	EPgy2	CAGTCGGG	CAACAGTCGGGCGA		C	A	A	C	A	G	T	C	G	G	G	C	G	A
X	-	X-7233409	FBti0100353	EPgy2	TCTCAAGG	ATATCTCAAGGCGT		A	T	A	T	C	T	C	A	A	G	G	C	G	T
X	-	X-7604314	FBti0038762	EPgy2	GTTTGGAA	TGGGTTTGGAACTT		T	G	G	G	T	T	T	G	G	A	A	C	T	T
X	-	X-7786083	FBti0039285	EPgy2	CGGCCGCA	TATCGGCCGCAGAA		T	A	T	C	G	G	C	C	G	C	A	G	A	A
X	-	X-7803149	FBti0038808	EPgy2	CCCCTAAC	ACACCCCTAACCTA		A	C	A	C	C	C	C	T	A	A	C	C	T	A
X	-	X-7806507	FBti0075964	EPgy2	CCTCGGCT	TCTCCTCGGCTCGT		T	C	T	C	C	T	C	G	G	C	T	C	G	T
X	-	X-7955236	FBti0040123	EPgy2	GGCGTTGG	AGTGGCGTTGGCGT		A	G	T	G	G	C	G	T	T	G	G	C	G	T
X	-	X-8025969	FBti0057654	EPgy2	GGCGCTCT	TTTGGCGCTCTCTT		T	T	T	G	G	C	G	C	T	C	T	C	T	T
X	-	X-8072169	FBti0075911	EPgy2	ATGTCACC	AAAATGTCACCCAA		A	A	A	A	T	G	T	C	A	C	C	C	A	A
X	-	X-8165453	FBti0027222	EPgy2	CAAAGACC	GGTCAAAGACCTGT		G	G	T	C	A	A	A	G	A	C	C	T	G	T
X	-	X-8304095	FBti0038840	EPgy2	GGATGGAT	AGTGGATGGATGAT		A	G	T	G	G	A	T	G	G	A	T	G	A	T
X	-	X-8330875	FBti0039269	EPgy2	GTTTGCTG	TTGGTTTGCTGCCG		T	T	G	G	T	T	T	G	C	T	G	C	C	G
X	-	X-8383566	FBti0038820	EPgy2	GGATGAAT	AAGGGATGAATCTT		A	A	G	G	G	A	T	G	A	A	T	C	T	T
X	-	X-8468494	FBti0038728	EPgy2	CAGCGGCC	TACCAGCGGCCTTT		T	A	C	C	A	G	C	G	G	C	C	T	T	T
X	-	X-8785835	FBti0057981	EPgy2	GCCAGACA	ATTGCCAGACAAAG		A	T	T	G	C	C	A	G	A	C	A	A	A	G
X	-	X-8808978	FBti0040250	EPgy2	GCTGAGGC	CCAGCTGAGGCTAT		C	C	A	G	C	T	G	A	G	G	C	T	A	T
X	-	X-8934036	FBti0038917	EPgy2	ACTGCGTG	AATACTGCGTGTGA		A	A	T	A	C	T	G	C	G	T	G	T	G	A
X	-	X-9023607	FBti0027165	EPgy2	ACCTGTAG	TTCACCTGTAGAGC		T	T	C	A	C	C	T	G	T	A	G	A	G	C
X	-	X-9029065	FBti0024124	EPgy2	CTTTAAGC	TTACTTTAAGCTTT		T	T	A	C	T	T	T	A	A	G	C	T	T	T
X	-	X-9034802	FBti0027162	EPgy2	TTGGAAAT	GTATTGGAAATAGA		G	T	A	T	T	G	G	A	A	A	T	A	G	A
X	-	X-9050723	FBti0024116	EPgy2	GACCGAAC	GAAGACCGAACTGA		G	A	A	G	A	C	C	G	A	A	C	T	G	A
X	-	X-9056196	FBti0040270	EPgy2	GCTGCATC	ACAGCTGCATCGCT		A	C	A	G	C	T	G	C	A	T	C	G	C	T
X	-	X-9057316	FBti0027062	EPgy2	GTACCGTT	TTGGTACCGTTTTT		T	T	G	G	T	A	C	C	G	T	T	T	T	T
X	-	X-9148970	FBti0038724	EPgy2	GTCGGGAA	ACTGTCGGGAACAG		A	C	T	G	T	C	G	G	G	A	A	C	A	G
X	-	X-9213313	FBti0076081	EPgy2	GTACTGGT	TCAGTACTGGTTCT		T	C	A	G	T	A	C	T	G	G	T	T	C	T
X	-	X-9545105	FBti0076102	EPgy2	GGCAGGAC	TTAGGCAGGACGAG		T	T	A	G	G	C	A	G	G	A	C	G	A	G
X	-	X-9560617	FBti0076101	EPgy2	GTGCGGCG	ATGGTGCGGCGCTA		A	T	G	G	T	G	C	G	G	C	G	C	T	A
X	-	X-9801333	FBti0025241	EPgy2	GTCCAGTG	TTAGTCCAGTGAAA		T	T	A	G	T	C	C	A	G	T	G	A	A	A
X	-	X-10144379	FBti0039624	EPgy2	GTCCTACC	GGAGTCCTACCAAT		G	G	A	G	T	C	C	T	A	C	C	A	A	T
X	-	X-10203204	FBti0033100	EPgy2	TCCTGGCT	TAATCCTGGCTGAT		T	A	A	T	C	C	T	G	G	C	T	G	A	T
X	-	X-10260232	FBti0039976	EPgy2	GTAAGGGG	AAAGTAAGGGGTTT		A	A	A	G	T	A	A	G	G	G	G	T	T	T
X	-	X-10366872	FBti0076040	EPgy2	GTTGCGTG	TTCGTTGCGTGGCC		T	T	C	G	T	T	G	C	G	T	G	G	C	C
X	-	X-10489880	FBti0057969	EPgy2	GTTTGGCT	TTAGTTTGGCTGCA		T	T	A	G	T	T	T	G	G	C	T	G	C	A
X	-	X-10624181	FBti0038953	EPgy2	GTCCATCC	TACGTCCATCCTAA		T	A	C	G	T	C	C	A	T	C	C	T	A	A
X	-	X-10635593	FBti0057633	EPgy2	TTCGGACT	CTGTTCGGACTGAA		C	T	G	T	T	C	G	G	A	C	T	G	A	A
X	-	X-10677996	FBti0039955	EPgy2	CGACCGAG	TTGCGACCGAGGCA		T	T	G	C	G	A	C	C	G	A	G	G	C	A
X	-	X-10751395	FBti0039216	EPgy2	CACCCACA	AAACACCCACATAA		A	A	A	C	A	C	C	C	A	C	A	T	A	A
X	-	X-10799514	FBti0057899	EPgy2	GACTGTAC	TCTGACTGTACTTT		T	C	T	G	A	C	T	G	T	A	C	T	T	T
X	-	X-11031063	FBti0038911	EPgy2	GGCGGCAT	GTTGGCGGCATCAC		G	T	T	G	G	C	G	G	C	A	T	C	A	C
X	-	X-11451163	FBti0076156	EPgy2	GCAGAAAT	AAGGCAGAAATAAA		A	A	G	G	C	A	G	A	A	A	T	A	A	A
X	-	X-11464332	FBti0039300	EPgy2	GAGTAGTT	AAGGAGTAGTTACA		A	A	G	G	A	G	T	A	G	T	T	A	C	A
X	-	X-11466376	FBti0100369	EPgy2	GTAAGGAG	AAAGTAAGGAGGGA		A	A	A	G	T	A	A	G	G	A	G	G	G	A
X	-	X-11474875	FBti0040082	EPgy2	GTGCGCGC	ACAGTGCGCGCCAG		A	C	A	G	T	G	C	G	C	G	C	C	A	G
X	-	X-11505647	FBti0057634	EPgy2	GTTTGGCG	GTTGTTTGGCGTAT		G	T	T	G	T	T	T	G	G	C	G	T	A	T
X	-	X-11588541	FBti0039431	EPgy2	GTCCAATT	AGTGTCCAATTAGA		A	G	T	G	T	C	C	A	A	T	T	A	G	A
X	-	X-11589974	FBti0039726	EPgy2	AGCTAAAC	ATAAGCTAAACGAT		A	T	A	A	G	C	T	A	A	A	C	G	A	T
X	-	X-11608698	FBti0024127	EPgy2	CTTGAGAC	CGACTTGAGACTAT		C	G	A	C	T	T	G	A	G	A	C	T	A	T
X	-	X-11623292	FBti0039969	EPgy2	TACAAGAC	AACTACAAGACCGA		A	A	C	T	A	C	A	A	G	A	C	C	G	A
X	-	X-11647994	FBti0039493	EPgy2	AGTGGAGT	CACAGTGGAGTCAA		C	A	C	A	G	T	G	G	A	G	T	C	A	A
X	-	X-11699492	FBti0057635	EPgy2	GCGCAAGC	AAGGCGCAAGCGAA		A	A	G	G	C	G	C	A	A	G	C	G	A	A
X	-	X-11710949	FBti0039790	EPgy2	GCTTGTAC	TTTGCTTGTACTTC		T	T	T	G	C	T	T	G	T	A	C	T	T	C
X	-	X-11746545	FBti0057702	EPgy2	GTGTAGTC	TGGGTGTAGTCATT		T	G	G	G	T	G	T	A	G	T	C	A	T	T
X	-	X-11781279	FBti0057998	EPgy2	GTGGGAAA	ATGGTGGGAAAGGA		A	T	G	G	T	G	G	G	A	A	A	G	G	A
X	-	X-11814508	FBti0040227	EPgy2	ACCTTGCC	GCTACCTTGCCTTA		G	C	T	A	C	C	T	T	G	C	C	T	T	A
X	-	X-11881594	FBti0027035	EPgy2	GGCAGCAG	AACGGCAGCAGCAA		A	A	C	G	G	C	A	G	C	A	G	C	A	A
X	-	X-11964491	FBti0027111	EPgy2	AGCGAAAC	ACGAGCGAAACGAA		A	C	G	A	G	C	G	A	A	A	C	G	A	A
X	-	X-12097557	FBti0024097	EPgy2	GATTGCCT	AAAGATTGCCTAAA		A	A	A	G	A	T	T	G	C	C	T	A	A	A
X	-	X-12357574	FBti0100368	EPgy2	ATCCGAAC	CCAATCCGAACCGA		C	C	A	A	T	C	C	G	A	A	C	C	G	A
X	-	X-12364397	FBti0057971	EPgy2	CTCACATC	ACACTCACATCCAA		A	C	A	C	T	C	A	C	A	T	C	C	A	A
X	-	X-12412955	FBti0077805	EPgy2	TGCCGTAC	AGTTGCCGTACAAA		A	G	T	T	G	C	C	G	T	A	C	A	A	A
X	-	X-12485937	FBti0038852	EPgy2	GGTCAATG	ATAGGTCAATGGAT		A	T	A	G	G	T	C	A	A	T	G	G	A	T
X	-	X-12649061	FBti0024842	EPgy2	GTACGGGG	ACGGTACGGGGTAC		A	C	G	G	T	A	C	G	G	G	G	T	A	C
X	-	X-12692409	FBti0038729	EPgy2	GGTTGGTC	ACTGGTTGGTCGAA		A	C	T	G	G	T	T	G	G	T	C	G	A	A
X	-	X-13006076	FBti0039109	EPgy2	GTTTTCGT	GCTGTTTTCGTTTG		G	C	T	G	T	T	T	T	C	G	T	T	T	G
X	-	X-13151237	FBti0039792	EPgy2	TTCCCATA	CTGTTCCCATAGAT		C	T	G	T	T	C	C	C	A	T	A	G	A	T
X	-	X-13158813	FBti0039315	EPgy2	GGTGAGTC	ATAGGTGAGTCCAC		A	T	A	G	G	T	G	A	G	T	C	C	A	C
X	-	X-13172806	FBti0039954	EPgy2	AGGTAGAG	AGGAGGTAGAGGTA		A	G	G	A	G	G	T	A	G	A	G	G	T	A
X	-	X-13267971	FBti0039387	EPgy2	CCTCCAGC	CCCCCTCCAGCTGT		C	C	C	C	C	T	C	C	A	G	C	T	G	T
X	-	X-13286273	FBti0057778	EPgy2	CCTCGAAT	TCCCCTCGAATCAA		T	C	C	C	C	T	C	G	A	A	T	C	A	A
X	-	X-13290971	FBti0075452	EPgy2	CACCAGAG	AACCACCAGAGAGC		A	A	C	C	A	C	C	A	G	A	G	A	G	C
X	-	X-13534687	FBti0040094	EPgy2	GTTAGCTG	AGAGTTAGCTGCGC		A	G	A	G	T	T	A	G	C	T	G	C	G	C
X	-	X-13649450	FBti0039605	EPgy2	CGCCTGAC	ATTCGCCTGACGTA		A	T	T	C	G	C	C	T	G	A	C	G	T	A
X	-	X-13676185	FBti0025280	EPgy2	GATCAGCT	AGTGATCAGCTCGC		A	G	T	G	A	T	C	A	G	C	T	C	G	C
X	-	X-13677784	FBti0039487	EPgy2	ATCCCGCA	GAGATCCCGCACCC		G	A	G	A	T	C	C	C	G	C	A	C	C	C
X	-	X-13903426	FBti0057943	EPgy2	ATCCCGCC	ACTATCCCGCCGAA		A	C	T	A	T	C	C	C	G	C	C	G	A	A
X	-	X-14493216	FBti0038896	EPgy2	CTTTGGGC	AGCCTTTGGGCGTA		A	G	C	C	T	T	T	G	G	G	C	G	T	A
X	-	X-14609655	FBti0075851	EPgy2	ACCAAGTT	GAAACCAAGTTGAT		G	A	A	A	C	C	A	A	G	T	T	G	A	T
X	-	X-14807998	FBti0057900	EPgy2	GATTATAG	ATAGATTATAGTTT		A	T	A	G	A	T	T	A	T	A	G	T	T	T
X	-	X-14844583	FBti0039661	EPgy2	GGATGGAC	TACGGATGGACCAA		T	A	C	G	G	A	T	G	G	A	C	C	A	A
X	-	X-14896084	FBti0024871	EPgy2	GTGCAAAG	AAAGTGCAAAGAAG		A	A	A	G	T	G	C	A	A	A	G	A	A	G
X	-	X-14917864	FBti0027219	EPgy2	ATTTAGGC	GTGATTTAGGCGAA		G	T	G	A	T	T	T	A	G	G	C	G	A	A
X	-	X-14918837	FBti0033383	EPgy2	GCCCGACC	AGCGCCCGACCTAC		A	G	C	G	C	C	C	G	A	C	C	T	A	C
X	-	X-14970268	FBti0039745	EPgy2	GGGCAGAG	ATAGGGCAGAGCAA		A	T	A	G	G	G	C	A	G	A	G	C	A	A
X	-	X-15036203	FBti0075933	EPgy2	TGCGTAAC	AGATGCGTAACGCC		A	G	A	T	G	C	G	T	A	A	C	G	C	C
X	-	X-15487731	FBti0057673	EPgy2	GGCCAGGC	TATGGCCAGGCGAC		T	A	T	G	G	C	C	A	G	G	C	G	A	C
X	-	X-15583996	FBti0039378	EPgy2	CGATTATA	CTTCGATTATACGA		C	T	T	C	G	A	T	T	A	T	A	C	G	A
X	-	X-15587097	FBti0075901	EPgy2	GGGCTGCA	TTTGGGCTGCACAA		T	T	T	G	G	G	C	T	G	C	A	C	A	A
X	-	X-15604603	FBti0040225	EPgy2	GCCCCGGA	AGAGCCCCGGAGAG		A	G	A	G	C	C	C	C	G	G	A	G	A	G
X	-	X-15654032	FBti0038924	EPgy2	AGCCGAAC	CTGAGCCGAACAGA		C	T	G	A	G	C	C	G	A	A	C	A	G	A
X	-	X-15679235	FBti0033324	EPgy2	ACGCCAAC	AACACGCCAACAAA		A	A	C	A	C	G	C	C	A	A	C	A	A	A
X	-	X-15693529	FBti0075848	EPgy2	GGCGGTAA	ACGGGCGGTAAGCT		A	C	G	G	G	C	G	G	T	A	A	G	C	T
X	-	X-15803713	FBti0039811	EPgy2	AGTTCAAA	GCTAGTTCAAATTA		G	C	T	A	G	T	T	C	A	A	A	T	T	A
X	-	X-15876950	FBti0076028	EPgy2	GCCCCACG	AAAGCCCCACGTAA		A	A	A	G	C	C	C	C	A	C	G	T	A	A
X	-	X-15957749	FBti0025256	EPgy2	GGCCAAGT	TGAGGCCAAGTGAA		T	G	A	G	G	C	C	A	A	G	T	G	A	A
X	-	X-15981611	FBti0057806	EPgy2	GGTGAGCG	ACAGGTGAGCGCGT		A	C	A	G	G	T	G	A	G	C	G	C	G	T
X	-	X-15988212	FBti0039712	EPgy2	GCTTGGAT	GGTGCTTGGATGGC		G	G	T	G	C	T	T	G	G	A	T	G	G	C
X	-	X-16244347	FBti0040029	EPgy2	GTCTGGCT	GTCGTCTGGCTTTC		G	T	C	G	T	C	T	G	G	C	T	T	T	C
X	-	X-16266973	FBti0025285	EPgy2	GCTTGGTT	GTAGCTTGGTTCAA		G	T	A	G	C	T	T	G	G	T	T	C	A	A
X	-	X-16473968	FBti0038841	EPgy2	GGTGGGCC	ATTGGTGGGCCTTT		A	T	T	G	G	T	G	G	G	C	C	T	T	T
X	-	X-16481232	FBti0039575	EPgy2	GCTTCGGC	TTTGCTTCGGCATT		T	T	T	G	C	T	T	C	G	G	C	A	T	T
X	-	X-16539770	FBti0025161	EPgy2	GGTGGAGC	ATAGGTGGAGCGGC		A	T	A	G	G	T	G	G	A	G	C	G	G	C
X	-	X-16542268	FBti0025262	EPgy2	GTTTGTTG	TCAGTTTGTTGGAA		T	C	A	G	T	T	T	G	T	T	G	G	A	A
X	-	X-16577607	FBti0024131	EPgy2	GTCAGAGT	ATAGTCAGAGTCTG		A	T	A	G	T	C	A	G	A	G	T	C	T	G
X	-	X-16645914	FBti0025212	EPgy2	AACTGTTG	TTCAACTGTTGCTT		T	T	C	A	A	C	T	G	T	T	G	C	T	T
X	-	X-16697660	FBti0025296	EPgy2	GTCGACTC	TTCGTCGACTCGCT		T	T	C	G	T	C	G	A	C	T	C	G	C	T
X	-	X-16830000	FBti0038681	EPgy2	GCCCACGC	ATAGCCCACGCAGT		A	T	A	G	C	C	C	A	C	G	C	A	G	T
X	-	X-17043062	FBti0027364	EPgy2	ACACAAGC	TGTACACAAGCTAA		T	G	T	A	C	A	C	A	A	G	C	T	A	A
X	-	X-17400683	FBti0027209	EPgy2	GTCTGGAT	GTGGTCTGGATACG		G	T	G	G	T	C	T	G	G	A	T	A	C	G
X	-	X-17521898	FBti0027278	EPgy2	CAACGACA	TAACAACGACAGCA		T	A	A	C	A	A	C	G	A	C	A	G	C	A
X	-	X-17546555	FBti0040080	EPgy2	CTCTCGCT	TGCCTCTCGCTCAA		T	G	C	C	T	C	T	C	G	C	T	C	A	A
X	-	X-17576962	FBti0040199	EPgy2	GATATGAG	TTTGATATGAGAAT		T	T	T	G	A	T	A	T	G	A	G	A	A	T
X	-	X-17596734	FBti0038812	EPgy2	ATCAGACA	AAAATCAGACACCG		A	A	A	A	T	C	A	G	A	C	A	C	C	G
X	-	X-17604188	FBti0038078	EPgy2	GGCGCAAC	AACGGCGCAACAAC		A	A	C	G	G	C	G	C	A	A	C	A	A	C
X	-	X-17778732	FBti0058024	EPgy2	TGCGAGGT	GTGTGCGAGGTATC		G	T	G	T	G	C	G	A	G	G	T	A	T	C
X	-	X-18031002	FBti0038867	EPgy2	GGCTAGAG	TTTGGCTAGAGATT		T	T	T	G	G	C	T	A	G	A	G	A	T	T
X	-	X-18399458	FBti0026447	EPgy2	CTGTAAGC	CACCTGTAAGCAGC		C	A	C	C	T	G	T	A	A	G	C	A	G	C
X	-	X-18425165	FBti0058018	EPgy2	CTCTGCAG	ACGCTCTGCAGCTC		A	C	G	C	T	C	T	G	C	A	G	C	T	C
X	-	X-18466476	FBti0024891	EPgy2	CAGCTGCC	AGGCAGCTGCCTGC		A	G	G	C	A	G	C	T	G	C	C	T	G	C
X	-	X-18547104	FBti0057834	EPgy2	ATGGGGAC	ATAATGGGGACCCT		A	T	A	A	T	G	G	G	G	A	C	C	C	T
X	-	X-18636894	FBti0038706	EPgy2	GTTCGATG	ATGGTTCGATGGTT		A	T	G	G	T	T	C	G	A	T	G	G	T	T
X	-	X-18677940	FBti0038726	EPgy2	TCTCCAAC	ATATCTCCAACCAT		A	T	A	T	C	T	C	C	A	A	C	C	A	T
X	-	X-18682753	FBti0039365	EPgy2	CTTGAAGG	AACCTTGAAGGTCA		A	A	C	C	T	T	G	A	A	G	G	T	C	A
X	-	X-18684096	FBti0039626	EPgy2	CCTTGAAG	GAACCTTGAAGGTC		G	A	A	C	C	T	T	G	A	A	G	G	T	C
X	-	X-18691804	FBti0039678	EPgy2	CTCCCATC	GTCCTCCCATCTCG		G	T	C	C	T	C	C	C	A	T	C	T	C	G
X	-	X-18757977	FBti0039294	EPgy2	GTTTGTTC	AGTGTTTGTTCCAT		A	G	T	G	T	T	T	G	T	T	C	C	A	T
X	-	X-18778528	FBti0039395	EPgy2	GCCTGGGA	AACGCCTGGGACAT		A	A	C	G	C	C	T	G	G	G	A	C	A	T
X	-	X-18787691	FBti0027300	EPgy2	GTTTGGAC	AGCGTTTGGACGCT		A	G	C	G	T	T	T	G	G	A	C	G	C	T
X	-	X-19102859	FBti0039270	EPgy2	GGCTTACC	ATGGGCTTACCTTT		A	T	G	G	G	C	T	T	A	C	C	T	T	T
X	-	X-19153972	FBti0039568	EPgy2	TCCCCTCG	AACTCCCCTCGATT		A	A	C	T	C	C	C	C	T	C	G	A	T	T
X	-	X-19207802	FBti0039607	EPgy2	GTCTCCCC	AGTGTCTCCCCCGC		A	G	T	G	T	C	T	C	C	C	C	C	G	C
X	-	X-19235937	FBti0040145	EPgy2	GCCTGTGC	GGTGCCTGTGCCTA		G	G	T	G	C	C	T	G	T	G	C	C	T	A
X	-	X-19374366	FBti0039398	EPgy2	ATACGGAC	ATGATACGGACGAC		A	T	G	A	T	A	C	G	G	A	C	G	A	C
X	-	X-19390687	FBti0025291	EPgy2	CCCCCGCC	ACACCCCCGCCGCA		A	C	A	C	C	C	C	C	G	C	C	G	C	A
X	-	X-19404428	FBti0027275	EPgy2	CGCCAGCC	GTTCGCCAGCCGTT		G	T	T	C	G	C	C	A	G	C	C	G	T	T
X	-	X-19416141	FBti0057764	EPgy2	GCCCAAAC	TGGGCCCAAACGAT		T	G	G	G	C	C	C	A	A	A	C	G	A	T
X	-	X-19531547	FBti0025235	EPgy2	GGTAGGTG	AGTGGTAGGTGTAT		A	G	T	G	G	T	A	G	G	T	G	T	A	T
X	-	X-19536859	FBti0039520	EPgy2	GCCTGAAC	ATCGCCTGAACTTA		A	T	C	G	C	C	T	G	A	A	C	T	T	A
X	-	X-19577755	FBti0076077	EPgy2	GTTATGCC	TCAGTTATGCCTGA		T	C	A	G	T	T	A	T	G	C	C	T	G	A
X	-	X-19640154	FBti0027242	EPgy2	GCCTCCGC	AAAGCCTCCGCAGT		A	A	A	G	C	C	T	C	C	G	C	A	G	T
X	-	X-19656611	FBti0038899	EPgy2	CTCCCAAC	AGACTCCCAACATC		A	G	A	C	T	C	C	C	A	A	C	A	T	C
X	-	X-19669226	FBti0076057	EPgy2	CTCTCGGC	ATACTCTCGGCGGA		A	T	A	C	T	C	T	C	G	G	C	G	G	A
X	-	X-19677613	FBti0024838	EPgy2	GTCCGTCG	AAGGTCCGTCGACT		A	A	G	G	T	C	C	G	T	C	G	A	C	T
X	-	X-19718122	FBti0057924	EPgy2	CGCTCAAC	AAACGCTCAACTAA		A	A	A	C	G	C	T	C	A	A	C	T	A	A
X	-	X-19739664	FBti0024130	EPgy2	GTGCAGTG	AGTGTGCAGTGTAA		A	G	T	G	T	G	C	A	G	T	G	T	A	A
X	-	X-19781139	FBti0057600	EPgy2	GTTCAGGC	TGGGTTCAGGCCAA		T	G	G	G	T	T	C	A	G	G	C	C	A	A
X	-	X-19867084	FBti0027357	EPgy2	GTCCTGGC	TCAGTCCTGGCCGA		T	C	A	G	T	C	C	T	G	G	C	C	G	A
X	-	X-19996838	FBti0039311	EPgy2	GTCCAACT	AGTGTCCAACTGAA		A	G	T	G	T	C	C	A	A	C	T	G	A	A
X	-	X-20004560	FBti0039538	EPgy2	GAACCAGG	ATAGAACCAGGTAA		A	T	A	G	A	A	C	C	A	G	G	T	A	A
X	-	X-20034631	FBti0058013	EPgy2	CCTCGCAC	AACCCTCGCACCAT		A	A	C	C	C	T	C	G	C	A	C	C	A	T
X	-	X-20057352	FBti0033208	EPgy2	CATTGTCC	TTCCATTGTCCATA		T	T	C	C	A	T	T	G	T	C	C	A	T	A
X	-	X-20128149	FBti0039289	EPgy2	CCCCAAAC	AAGCCCCAAACGAA		A	A	G	C	C	C	C	A	A	A	C	G	A	A
X	-	X-20925190	FBti0024105	EPgy2	GGCTGATT	TTTGGCTGATTTAT		T	T	T	G	G	C	T	G	A	T	T	T	A	T
X	-	X-20973918	FBti0039388	EPgy2	ATTCAGCT	CGCATTCAGCTTAC		C	G	C	A	T	T	C	A	G	C	T	T	A	C
X	-	X-21191090	FBti0076022	EPgy2	GATTGTGC	TTAGATTGTGCCAT		T	T	A	G	A	T	T	G	T	G	C	C	A	T
X	-	X-21216422	FBti0027250	EPgy2	CCTTGCTC	TGACCTTGCTCAAA		T	G	A	C	C	T	T	G	C	T	C	A	A	A
X	-	X-21245270	FBti0024094	EPgy2	GCGTGGCT	AATGCGTGGCTGAT		A	A	T	G	C	G	T	G	G	C	T	G	A	T
X	-	X-21390675	FBti0075448	EPgy2	CGATGTAC	AACCGATGTACCCT		A	A	C	C	G	A	T	G	T	A	C	C	C	T
X	-	X-21443385	FBti0038955	EPgy2	GTTTCGAG	AGTGTTTCGAGTAT		A	G	T	G	T	T	T	C	G	A	G	T	A	T
X	-	X-21501171	FBti0027147	EPgy2	AGCCGGGG	AAGAGCCGGGGACA		A	A	G	A	G	C	C	G	G	G	G	A	C	A
X	-	X-21980518	FBti0025238	EPgy2	GTGCGGAG	TTAGTGCGGAGTGG		T	T	A	G	T	G	C	G	G	A	G	T	G	G
X	-	X-22114512	FBti0038947	EPgy2	GAGTGGAG	AATGAGTGGAGCAT		A	A	T	G	A	G	T	G	G	A	G	C	A	T
X	-	X-22408819	FBti0038957	EPgy2	CGTGCAAG	AGACGTGCAAGCAT		A	G	A	C	G	T	G	C	A	A	G	C	A	T
							Position Count Matrix EPgy2-
						Sum	A	716	357	443	308	218	176	186	505	480	568	149	320	579	524
							C	143	310	315	369	344	720	573	259	189	390	735	423	261	166
							G	172	287	452	746	389	195	266	626	696	361	352	355	286	143
							T	518	595	339	126	598	458	524	159	184	230	313	451	423	716
						Checksum		1549	1549	1549	1549	1549	1549	1549	1549	1549	1549	1549	1549	1549	1549
							Position Frequency Matrix EPgy2-
						Sum	A	46.2234	23.0471	28.5991	19.8838	14.0736	11.3622	12.0077	32.6017	30.9877	36.6688	9.61911	20.6585	37.379	33.8283
							C	9.23176	20.0129	20.3357	23.8218	22.2079	46.4816	36.9916	16.7205	12.2014	25.1775	47.45	27.3079	16.8496	10.7166
							G	11.1039	18.5281	29.1801	48.1601	25.113	12.5888	17.1724	40.4132	44.9322	23.3054	22.7243	22.918	18.4635	9.23176
							T	33.4409	38.4119	21.8851	8.13428	38.6056	29.5675	33.8283	10.2647	11.8786	14.8483	20.2066	29.1156	27.3079	46.2234
						Checksum		100	100	100	100	100	100	100	100	100	100	100	100	100	100

## Sheet: EPgy2 +
Chromosome	P direction	insertionSite	PelementFlybaseId	PelementType	8 bp repeat	14 bp ins. site		1	2	3	4	5	6	7	8	9	10	11	12	13	14
2L	+	2L+67576	FBti0039195	EPgy2	CTCTGTGC	TTACTCTGTGCGGA		T	T	A	C	T	C	T	G	T	G	C	G	G	A
2L	+	2L+80708	FBti0039584	EPgy2	GGCAACAT	AGAGGCAACATCAT		A	G	A	G	G	C	A	A	C	A	T	C	A	T
2L	+	2L+102297	FBti0039582	EPgy2	CTTTGTTG	TTGCTTTGTTGTTT		T	T	G	C	T	T	T	G	T	T	G	T	T	T
2L	+	2L+131986	FBti0033376	EPgy2	ATCAGGAC	AAGATCAGGACACC		A	A	G	A	T	C	A	G	G	A	C	A	C	C
2L	+	2L+143339	FBti0039437	EPgy2	AGCAGAAC	CAAAGCAGAACCAA		C	A	A	A	G	C	A	G	A	A	C	C	A	A
2L	+	2L+160863	FBti0057727	EPgy2	GTGTGGGC	AGCGTGTGGGCGGC		A	G	C	G	T	G	T	G	G	G	C	G	G	C
2L	+	2L+255042	FBti0039566	EPgy2	CTGCGGAT	TTGCTGCGGATTAA		T	T	G	C	T	G	C	G	G	A	T	T	A	A
2L	+	2L+273948	FBti0075446	EPgy2	ATCCTATC	TTCATCCTATCAAC		T	T	C	A	T	C	C	T	A	T	C	A	A	C
2L	+	2L+292463	FBti0100378	EPgy2	GTGCAGAC	ATTGTGCAGACAAT		A	T	T	G	T	G	C	A	G	A	C	A	A	T
2L	+	2L+402204	FBti0057848	EPgy2	CGCAGGTC	TAGCGCAGGTCCAT		T	A	G	C	G	C	A	G	G	T	C	C	A	T
2L	+	2L+421506	FBti0057726	EPgy2	GTTTGGAT	AATGTTTGGATTAT		A	A	T	G	T	T	T	G	G	A	T	T	A	T
2L	+	2L+431095	FBti0039990	EPgy2	GGGGAAAC	TGAGGGGAAACCGA		T	G	A	G	G	G	G	A	A	A	C	C	G	A
2L	+	2L+790912	FBti0038921	EPgy2	GGCAGACC	TTCGGCAGACCCTT		T	T	C	G	G	C	A	G	A	C	C	C	T	T
2L	+	2L+815874	FBti0039265	EPgy2	TGTCAGAC	CCGTGTCAGACATA		C	C	G	T	G	T	C	A	G	A	C	A	T	A
2L	+	2L+825949	FBti0039883	EPgy2	TGCTCGTC	GCGTGCTCGTCTCT		G	C	G	T	G	C	T	C	G	T	C	T	C	T
2L	+	2L+853380	FBti0057668	EPgy2	ACAGTCAC	TTCACAGTCACCGT		T	T	C	A	C	A	G	T	C	A	C	C	G	T
2L	+	2L+901660	FBti0100374	EPgy2	AGTAGCCT	TTCAGTAGCCTGCT		T	T	C	A	G	T	A	G	C	C	T	G	C	T
2L	+	2L+1150807	FBti0057639	EPgy2	ATCCAACC	GTTATCCAACCATT		G	T	T	A	T	C	C	A	A	C	C	A	T	T
2L	+	2L+1187592	FBti0075918	EPgy2	CACCAAAC	TGCCACCAAACCAC		T	G	C	C	A	C	C	A	A	A	C	C	A	C
2L	+	2L+1420445	FBti0075906	EPgy2	GTCTCACC	TTTGTCTCACCACG		T	T	T	G	T	C	T	C	A	C	C	A	C	G
2L	+	2L+1710447	FBti0039348	EPgy2	GGTTAAAC	TTCGGTTAAACTGT		T	T	C	G	G	T	T	A	A	A	C	T	G	T
2L	+	2L+1938265	FBti0038932	EPgy2	GGACGGAC	AGGGGACGGACTCT		A	G	G	G	G	A	C	G	G	A	C	T	C	T
2L	+	2L+2130210	FBti0027239	EPgy2	CTCCAGTT	CGACTCCAGTTCCA		C	G	A	C	T	C	C	A	G	T	T	C	C	A
2L	+	2L+2130801	FBti0027280	EPgy2	GGCGAAAG	AAAGGCGAAAGATT		A	A	A	G	G	C	G	A	A	A	G	A	T	T
2L	+	2L+2217286	FBti0039518	EPgy2	GTCAGAGG	TAGGTCAGAGGAAA		T	A	G	G	T	C	A	G	A	G	G	A	A	A
2L	+	2L+2451198	FBti0039597	EPgy2	CCCGTTAG	AATCCCGTTAGTGT		A	A	T	C	C	C	G	T	T	A	G	T	G	T
2L	+	2L+2677683	FBti0057638	EPgy2	CACCCGCC	ACACACCCGCCGTC		A	C	A	C	A	C	C	C	G	C	C	G	T	C
2L	+	2L+2808232	FBti0027202	EPgy2	GTTCAACC	GTGGTTCAACCTAG		G	T	G	G	T	T	C	A	A	C	C	T	A	G
2L	+	2L+2885952	FBti0057688	EPgy2	AAGCCAAC	AACAAGCCAACGAA		A	A	C	A	A	G	C	C	A	A	C	G	A	A
2L	+	2L+2897861	FBti0057993	EPgy2	ATACGAGC	ATAATACGAGCATA		A	T	A	A	T	A	C	G	A	G	C	A	T	A
2L	+	2L+3018385	FBti0039399	EPgy2	CCCCCAGC	ATCCCCCCAGCAGT		A	T	C	C	C	C	C	C	A	G	C	A	G	T
2L	+	2L+3048695	FBti0027105	EPgy2	ATTCCGCC	AATATTCCGCCATG		A	A	T	A	T	T	C	C	G	C	C	A	T	G
2L	+	2L+3056611	FBti0033325	EPgy2	CTCATGGT	TAGCTCATGGTTAA		T	A	G	C	T	C	A	T	G	G	T	T	A	A
2L	+	2L+3168133	FBti0033358	EPgy2	GTTCTAAC	GTGGTTCTAACTGT		G	T	G	G	T	T	C	T	A	A	C	T	G	T
2L	+	2L+3322961	FBti0027143	EPgy2	GTCGCGAT	ACTGTCGCGATCTT		A	C	T	G	T	C	G	C	G	A	T	C	T	T
2L	+	2L+3452498	FBti0027199	EPgy2	CCTCTAAC	CGGCCTCTAACTGT		C	G	G	C	C	T	C	T	A	A	C	T	G	T
2L	+	2L+3469944	FBti0039008	EPgy2	GTTCCGAC	CCGGTTCCGACTAT		C	C	G	G	T	T	C	C	G	A	C	T	A	T
2L	+	2L+3656973	FBti0057742	EPgy2	ATAGCGAC	ACAATAGCGACCTG		A	C	A	A	T	A	G	C	G	A	C	C	T	G
2L	+	2L+4282940	FBti0040032	EPgy2	GTAAAAAT	GCAGTAAAAATATG		G	C	A	G	T	A	A	A	A	A	T	A	T	G
2L	+	2L+4371957	FBti0038951	EPgy2	GCTCAGTT	ATGGCTCAGTTCGT		A	T	G	G	C	T	C	A	G	T	T	C	G	T
2L	+	2L+4394166	FBti0040053	EPgy2	AGGATCCC	CTGAGGATCCCCCA		C	T	G	A	G	G	A	T	C	C	C	C	C	A
2L	+	2L+4892123	FBti0024103	EPgy2	GGCCACAG	ATAGGCCACAGGGT		A	T	A	G	G	C	C	A	C	A	G	G	G	T
2L	+	2L+4976988	FBti0039329	EPgy2	TGTCCAGC	CTCTGTCCAGCTGT		C	T	C	T	G	T	C	C	A	G	C	T	G	T
2L	+	2L+4977312	FBti0027237	EPgy2	CATTGGAT	AGCCATTGGATATA		A	G	C	C	A	T	T	G	G	A	T	A	T	A
2L	+	2L+4981644	FBti0040175	EPgy2	CTTTGCGT	TTGCTTTGCGTTTG		T	T	G	C	T	T	T	G	C	G	T	T	T	G
2L	+	2L+5044398	FBti0076055	EPgy2	GTCTCCAT	TTAGTCTCCATGTT		T	T	A	G	T	C	T	C	C	A	T	G	T	T
2L	+	2L+5094061	FBti0039380	EPgy2	GTTATGAC	TTGGTTATGACCTA		T	T	G	G	T	T	A	T	G	A	C	C	T	A
2L	+	2L+5237373	FBti0057926	EPgy2	GGCCAGTG	TTGGGCCAGTGCGA		T	T	G	G	G	C	C	A	G	T	G	C	G	A
2L	+	2L+5293165	FBti0025201	EPgy2	GTCTGTAT	TTAGTCTGTATTCT		T	T	A	G	T	C	T	G	T	A	T	T	C	T
2L	+	2L+5336006	FBti0076075	EPgy2	CACCATGC	TAGCACCATGCGAA		T	A	G	C	A	C	C	A	T	G	C	G	A	A
2L	+	2L+5532800	FBti0024859	EPgy2	CGAAAAAA	GGCCGAAAAAATAT		G	G	C	C	G	A	A	A	A	A	A	T	A	T
2L	+	2L+5542548	FBti0038817	EPgy2	CGCCAAAC	ATCCGCCAAACGAA		A	T	C	C	G	C	C	A	A	A	C	G	A	A
2L	+	2L+5547638	FBti0027090	EPgy2	GTCTCGTC	AGAGTCTCGTCTAT		A	G	A	G	T	C	T	C	G	T	C	T	A	T
2L	+	2L+5802191	FBti0039508	EPgy2	ATCCGTAC	TGCATCCGTACCTT		T	G	C	A	T	C	C	G	T	A	C	C	T	T
2L	+	2L+5907156	FBti0027137	EPgy2	TGCCCAGG	TGCTGCCCAGGTAT		T	G	C	T	G	C	C	C	A	G	G	T	A	T
2L	+	2L+5943955	FBti0040026	EPgy2	AGCCCGCC	TTTAGCCCGCCTGA		T	T	T	A	G	C	C	C	G	C	C	T	G	A
2L	+	2L+5977524	FBti0058002	EPgy2	GTATGTAT	GTAGTATGTATATG		G	T	A	G	T	A	T	G	T	A	T	A	T	G
2L	+	2L+5986403	FBti0039714	EPgy2	GCTCCGAT	TGTGCTCCGATACT		T	G	T	G	C	T	C	C	G	A	T	A	C	T
2L	+	2L+6066223	FBti0039559	EPgy2	GGCAGAAA	ACGGGCAGAAAGAT		A	C	G	G	G	C	A	G	A	A	A	G	A	T
2L	+	2L+6098923	FBti0040259	EPgy2	ATTCAGAC	TTTATTCAGACGAA		T	T	T	A	T	T	C	A	G	A	C	G	A	A
2L	+	2L+6151042	FBti0027156	EPgy2	GGGCGAAG	TTAGGGCGAAGTGA		T	T	A	G	G	G	C	G	A	A	G	T	G	A
2L	+	2L+6235090	FBti0057735	EPgy2	TTTCGTAC	TTATTTCGTACCGT		T	T	A	T	T	T	C	G	T	A	C	C	G	T
2L	+	2L+6339359	FBti0033140	EPgy2	GTCTGTGT	TTGGTCTGTGTGAT		T	T	G	G	T	C	T	G	T	G	T	G	A	T
2L	+	2L+6424334	FBti0039606	EPgy2	GGGCTGTT	ACGGGGCTGTTATG		A	C	G	G	G	G	C	T	G	T	T	A	T	G
2L	+	2L+6456003	FBti0039354	EPgy2	GTTTAATC	TATGTTTAATCGAA		T	A	T	G	T	T	T	A	A	T	C	G	A	A
2L	+	2L+6480953	FBti0039901	EPgy2	CCGCGAAC	CCTCCGCGAACCAT		C	C	T	C	C	G	C	G	A	A	C	C	A	T
2L	+	2L+6612593	FBti0024078	EPgy2	AGGCGGAG	GGCAGGCGGAGACT		G	G	C	A	G	G	C	G	G	A	G	A	C	T
2L	+	2L+6656407	FBti0075464	EPgy2	CACGAGGC	AAGCACGAGGCCCT		A	A	G	C	A	C	G	A	G	G	C	C	C	T
2L	+	2L+6717657	FBti0057825	EPgy2	TTAAATGT	AGATTAAATGTATG		A	G	A	T	T	A	A	A	T	G	T	A	T	G
2L	+	2L+6742074	FBti0039146	EPgy2	ATGTTGCC	TCCATGTTGCCTTG		T	C	C	A	T	G	T	T	G	C	C	T	T	G
2L	+	2L+6786895	FBti0076025	EPgy2	CCACGGAG	TCTCCACGGAGCCT		T	C	T	C	C	A	C	G	G	A	G	C	C	T
2L	+	2L+6920725	FBti0057729	EPgy2	GTGTGGCA	ATCGTGTGGCATAT		A	T	C	G	T	G	T	G	G	C	A	T	A	T
2L	+	2L+6926881	FBti0039453	EPgy2	ATTCCTTA	GATATTCCTTAACT		G	A	T	A	T	T	C	C	T	T	A	A	C	T
2L	+	2L+6964436	FBti0039887	EPgy2	ACCTCGGC	AGGACCTCGGCTAT		A	G	G	A	C	C	T	C	G	G	C	T	A	T
2L	+	2L+7024462	FBti0025206	EPgy2	GTTTGGCC	CTCGTTTGGCCTAA		C	T	C	G	T	T	T	G	G	C	C	T	A	A
2L	+	2L+7122277	FBti0038929	EPgy2	GTCTAGGT	GTCGTCTAGGTAGA		G	T	C	G	T	C	T	A	G	G	T	A	G	A
2L	+	2L+7359990	FBti0077803	EPgy2	GTCTAAAC	GATGTCTAAACTAA		G	A	T	G	T	C	T	A	A	A	C	T	A	A
2L	+	2L+7427036	FBti0057819	EPgy2	GTCTACGG	GGCGTCTACGGAGA		G	G	C	G	T	C	T	A	C	G	G	A	G	A
2L	+	2L+7544859	FBti0039588	EPgy2	GTTGTCGT	ATTGTTGTCGTCGC		A	T	T	G	T	T	G	T	C	G	T	C	G	C
2L	+	2L+7565676	FBti0027226	EPgy2	AGGCCCAA	GCCAGGCCCAAATG		G	C	C	A	G	G	C	C	C	A	A	A	T	G
2L	+	2L+7590421	FBti0058039	EPgy2	CACTGCGT	AAACACTGCGTTAA		A	A	A	C	A	C	T	G	C	G	T	T	A	A
2L	+	2L+7800421	FBti0024059	EPgy2	TTCGGCGT	GTGTTCGGCGTGTC		G	T	G	T	T	C	G	G	C	G	T	G	T	C
2L	+	2L+7827220	FBti0024834	EPgy2	ATCCGTGG	CGAATCCGTGGAAT		C	G	A	A	T	C	C	G	T	G	G	A	A	T
2L	+	2L+7828508	FBti0057734	EPgy2	CGCTGACC	AATCGCTGACCAGA		A	A	T	C	G	C	T	G	A	C	C	A	G	A
2L	+	2L+7833218	FBti0058015	EPgy2	GTCTTACC	TTTGTCTTACCATT		T	T	T	G	T	C	T	T	A	C	C	A	T	T
2L	+	2L+7875767	FBti0039358	EPgy2	GTTGTGCC	GTCGTTGTGCCGAT		G	T	C	G	T	T	G	T	G	C	C	G	A	T
2L	+	2L+8009288	FBti0039229	EPgy2	GATTTACC	ATTGATTTACCTTA		A	T	T	G	A	T	T	T	A	C	C	T	T	A
2L	+	2L+8012780	FBti0027361	EPgy2	CCTGCGCC	TTGCCTGCGCCTAA		T	T	G	C	C	T	G	C	G	C	C	T	A	A
2L	+	2L+8031875	FBti0040149	EPgy2	ATAAATTA	GTCATAAATTACCA		G	T	C	A	T	A	A	A	T	T	A	C	C	A
2L	+	2L+8088290	FBti0040109	EPgy2	AGGCTTTA	GACAGGCTTTAAAG		G	A	C	A	G	G	C	T	T	T	A	A	A	G
2L	+	2L+8162477	FBti0039318	EPgy2	GTCTATAC	ACTGTCTATACCAT		A	C	T	G	T	C	T	A	T	A	C	C	A	T
2L	+	2L+8204198	FBti0076001	EPgy2	GTAGGGCA	CAGGTAGGGCACAT		C	A	G	G	T	A	G	G	G	C	A	C	A	T
2L	+	2L+8205463	FBti0076000	EPgy2	ATACAGAC	TGGATACAGACGAT		T	G	G	A	T	A	C	A	G	A	C	G	A	T
2L	+	2L+8305603	FBti0076036	EPgy2	CTTTGAAC	CAACTTTGAACACT		C	A	A	C	T	T	T	G	A	A	C	A	C	T
2L	+	2L+8320308	FBti0075928	EPgy2	GTCCCGAC	TTGGTCCCGACACC		T	T	G	G	T	C	C	C	G	A	C	A	C	C
2L	+	2L+8342558	FBti0039118	EPgy2	GAGCCAGC	AGAGAGCCAGCAAA		A	G	A	G	A	G	C	C	A	G	C	A	A	A
2L	+	2L+8364799	FBti0025183	EPgy2	CACCTGAC	TTCCACCTGACCAT		T	T	C	C	A	C	C	T	G	A	C	C	A	T
2L	+	2L+8382802	FBti0039857	EPgy2	GTTAAGAC	AGTGTTAAGACTTC		A	G	T	G	T	T	A	A	G	A	C	T	T	C
2L	+	2L+8400341	FBti0057832	EPgy2	AGCTGAGT	AGCAGCTGAGTGAT		A	G	C	A	G	C	T	G	A	G	T	G	A	T
2L	+	2L+8403611	FBti0039947	EPgy2	CACAGAAC	GCACACAGAACCAA		G	C	A	C	A	C	A	G	A	A	C	C	A	A
2L	+	2L+8411741	FBti0057722	EPgy2	CTTATGAC	ATGCTTATGACTAA		A	T	G	C	T	T	A	T	G	A	C	T	A	A
2L	+	2L+8415669	FBti0039689	EPgy2	GCCTGGAG	TTGGCCTGGAGGCT		T	T	G	G	C	C	T	G	G	A	G	G	C	T
2L	+	2L+8419848	FBti0040012	EPgy2	GATACTAC	ATCGATACTACCAT		A	T	C	G	A	T	A	C	T	A	C	C	A	T
2L	+	2L+8481855	FBti0038950	EPgy2	CTTTGTTC	TCACTTTGTTCAAT		T	C	A	C	T	T	T	G	T	T	C	A	A	T
2L	+	2L+8529320	FBti0075952	EPgy2	GGCCTGCG	ATAGGCCTGCGAAT		A	T	A	G	G	C	C	T	G	C	G	A	A	T
2L	+	2L+8587986	FBti0027136	EPgy2	GACTGGAT	CTGGACTGGATTGT		C	T	G	G	A	C	T	G	G	A	T	T	G	T
2L	+	2L+8686243	FBti0057768	EPgy2	GTTCAACT	AAGGTTCAACTCTA		A	A	G	G	T	T	C	A	A	C	T	C	T	A
2L	+	2L+8705407	FBti0100372	EPgy2	GTCTAGAG	TTGGTCTAGAGGTA		T	T	G	G	T	C	T	A	G	A	G	G	T	A
2L	+	2L+8948724	FBti0057849	EPgy2	TGCTGAAT	ATGTGCTGAATGCT		A	T	G	T	G	C	T	G	A	A	T	G	C	T
2L	+	2L+8991184	FBti0038720	EPgy2	GTTCTCCG	TCGGTTCTCCGTGT		T	C	G	G	T	T	C	T	C	C	G	T	G	T
2L	+	2L+9125252	FBti0040241	EPgy2	CAAAATTT	TGGCAAAATTTTAC		T	G	G	C	A	A	A	A	T	T	T	T	A	C
2L	+	2L+9164092	FBti0040252	EPgy2	CTTTCGAC	TCTCTTTCGACGAT		T	C	T	C	T	T	T	C	G	A	C	G	A	T
2L	+	2L+9263158	FBti0057662	EPgy2	CCCCCGCC	GACCCCCCGCCAAA		G	A	C	C	C	C	C	C	G	C	C	A	A	A
2L	+	2L+9337682	FBti0075923	EPgy2	GCCGCGGG	ATGGCCGCGGGGCT		A	T	G	G	C	C	G	C	G	G	G	G	C	T
2L	+	2L+9416502	FBti0027241	EPgy2	CACCAACA	TTACACCAACACAA		T	T	A	C	A	C	C	A	A	C	A	C	A	A
2L	+	2L+9449810	FBti0039699	EPgy2	GACTAGAG	AAGGACTAGAGGAT		A	A	G	G	A	C	T	A	G	A	G	G	A	T
2L	+	2L+9460312	FBti0039924	EPgy2	GGCATGCT	AAGGGCATGCTGAA		A	A	G	G	G	C	A	T	G	C	T	G	A	A
2L	+	2L+9494029	FBti0024873	EPgy2	GTCCGAGG	TTCGTCCGAGGTGT		T	T	C	G	T	C	C	G	A	G	G	T	G	T
2L	+	2L+9497275	FBti0025186	EPgy2	GTGCGGAT	TTGGTGCGGATCGG		T	T	G	G	T	G	C	G	G	A	T	C	G	G
2L	+	2L+9616844	FBti0040023	EPgy2	GTCTGATC	AGTGTCTGATCTTA		A	G	T	G	T	C	T	G	A	T	C	T	T	A
2L	+	2L+9888116	FBti0039691	EPgy2	GCCCAGGC	ATTGCCCAGGCGTC		A	T	T	G	C	C	C	A	G	G	C	G	T	C
2L	+	2L+9915328	FBti0027216	EPgy2	GGCCGTAG	TCAGGCCGTAGACG		T	C	A	G	G	C	C	G	T	A	G	A	C	G
2L	+	2L+9918668	FBti0039405	EPgy2	CACAAGAC	GGTCACAAGACCAT		G	G	T	C	A	C	A	A	G	A	C	C	A	T
2L	+	2L+10032623	FBti0039786	EPgy2	GTTCGTGC	TTCGTTCGTGCGCT		T	T	C	G	T	T	C	G	T	G	C	G	C	T
2L	+	2L+10057031	FBti0039779	EPgy2	GTCTGAGG	TGTGTCTGAGGAGG		T	G	T	G	T	C	T	G	A	G	G	A	G	G
2L	+	2L+10057508	FBti0027227	EPgy2	GTCCAATC	GTGGTCCAATCCAA		G	T	G	G	T	C	C	A	A	T	C	C	A	A
2L	+	2L+10200998	FBti0027244	EPgy2	CTACTACG	TGCCTACTACGTGT		T	G	C	C	T	A	C	T	A	C	G	T	G	T
2L	+	2L+10220945	FBti0039646	EPgy2	AGTTAAAC	AATAGTTAAACTAT		A	A	T	A	G	T	T	A	A	A	C	T	A	T
2L	+	2L+10250060	FBti0040036	EPgy2	GGCTGCCC	ATGGGCTGCCCGAG		A	T	G	G	G	C	T	G	C	C	C	G	A	G
2L	+	2L+10411196	FBti0033151	EPgy2	CACGCGTC	AGACACGCGTCTGA		A	G	A	C	A	C	G	C	G	T	C	T	G	A
2L	+	2L+10426918	FBti0039871	EPgy2	AGGTGACG	ACAAGGTGACGGCC		A	C	A	A	G	G	T	G	A	C	G	G	C	C
2L	+	2L+10454115	FBti0075982	EPgy2	AGCAGGTC	GTCAGCAGGTCTCT		G	T	C	A	G	C	A	G	G	T	C	T	C	T
2L	+	2L+10457652	FBti0033160	EPgy2	TTAATTAG	GTTTTAATTAGATT		G	T	T	T	T	A	A	T	T	A	G	A	T	T
2L	+	2L+10469511	FBti0058003	EPgy2	CTTGGGAA	TCACTTGGGAATTT		T	C	A	C	T	T	G	G	G	A	A	T	T	T
2L	+	2L+10480033	FBti0027325	EPgy2	CCCTGGTC	AACCCCTGGTCACA		A	A	C	C	C	C	T	G	G	T	C	A	C	A
2L	+	2L+10679367	FBti0075861	EPgy2	GTCAGCTC	CCAGTCAGCTCCAT		C	C	A	G	T	C	A	G	C	T	C	C	A	T
2L	+	2L+10737358	FBti0027085	EPgy2	CAAAGGAT	AGACAAAGGATAGA		A	G	A	C	A	A	A	G	G	A	T	A	G	A
2L	+	2L+10961145	FBti0057793	EPgy2	GACCAGAC	TCCGACCAGACACT		T	C	C	G	A	C	C	A	G	A	C	A	C	T
2L	+	2L+10975257	FBti0057843	EPgy2	TGCTGTCC	AACTGCTGTCCATT		A	A	C	T	G	C	T	G	T	C	C	A	T	T
2L	+	2L+10989352	FBti0076122	EPgy2	GTCGCCAC	GCAGTCGCCACCAA		G	C	A	G	T	C	G	C	C	A	C	C	A	A
2L	+	2L+11004849	FBti0057697	EPgy2	CATTGGCA	TTCCATTGGCATAT		T	T	C	C	A	T	T	G	G	C	A	T	A	T
2L	+	2L+11067324	FBti0038928	EPgy2	TAATGACC	TGCTAATGACCAAA		T	G	C	T	A	A	T	G	A	C	C	A	A	A
2L	+	2L+11084438	FBti0039351	EPgy2	GTCCAGCT	CCGGTCCAGCTTCG		C	C	G	G	T	C	C	A	G	C	T	T	C	G
2L	+	2L+11088581	FBti0038889	EPgy2	TCAGTCTA	AAATCAGTCTAATC		A	A	A	T	C	A	G	T	C	T	A	A	T	C
2L	+	2L+11113378	FBti0033303	EPgy2	TTTTGGCA	GTGTTTTGGCAGTA		G	T	G	T	T	T	T	G	G	C	A	G	T	A
2L	+	2L+11130724	FBti0076053	EPgy2	GTACTTAG	TTAGTACTTAGGTT		T	T	A	G	T	A	C	T	T	A	G	G	T	T
2L	+	2L+11211621	FBti0039610	EPgy2	GGCCAGCC	AGAGGCCAGCCCAC		A	G	A	G	G	C	C	A	G	C	C	C	A	C
2L	+	2L+11247627	FBti0033106	EPgy2	GTCCCCGC	TGAGTCCCCGCAAT		T	G	A	G	T	C	C	C	C	G	C	A	A	T
2L	+	2L+11268964	FBti0039821	EPgy2	GGCTTGCG	ATTGGCTTGCGGGC		A	T	T	G	G	C	T	T	G	C	G	G	G	C
2L	+	2L+11788674	FBti0057911	EPgy2	AACTAAAC	TTAAACTAAACAGT		T	T	A	A	A	C	T	A	A	A	C	A	G	T
2L	+	2L+11989517	FBti0040240	EPgy2	GCACAAAG	TAAGCACAAAGCAA		T	A	A	G	C	A	C	A	A	A	G	C	A	A
2L	+	2L+12007204	FBti0058041	EPgy2	ATTCAGTC	AGCATTCAGTCGCA		A	G	C	A	T	T	C	A	G	T	C	G	C	A
2L	+	2L+12045925	FBti0024091	EPgy2	AATCAGGC	AACAATCAGGCAAA		A	A	C	A	A	T	C	A	G	G	C	A	A	A
2L	+	2L+12055996	FBti0040249	EPgy2	GCTGCAGC	TGGGCTGCAGCGCT		T	G	G	G	C	T	G	C	A	G	C	G	C	T
2L	+	2L+12065981	FBti0027392	EPgy2	GGCATGCG	AGCGGCATGCGGTT		A	G	C	G	G	C	A	T	G	C	G	G	T	T
2L	+	2L+12103343	FBti0075846	EPgy2	AGTGGCTC	TTGAGTGGCTCGAA		T	T	G	A	G	T	G	G	C	T	C	G	A	A
2L	+	2L+12423405	FBti0038850	EPgy2	GTGTGGGT	TGTGTGTGGGTCAC		T	G	T	G	T	G	T	G	G	G	T	C	A	C
2L	+	2L+12434819	FBti0057710	EPgy2	CCCTTGGC	AACCCCTTGGCGTT		A	A	C	C	C	C	T	T	G	G	C	G	T	T
2L	+	2L+12445944	FBti0038997	EPgy2	GCACCGTG	TTAGCACCGTGTAT		T	T	A	G	C	A	C	C	G	T	G	T	A	T
2L	+	2L+12522177	FBti0033245	EPgy2	GTTCAATC	TTGGTTCAATCCTT		T	T	G	G	T	T	C	A	A	T	C	C	T	T
2L	+	2L+12722365	FBti0057681	EPgy2	ATGCAGCC	AAGATGCAGCCCAA		A	A	G	A	T	G	C	A	G	C	C	C	A	A
2L	+	2L+12874601	FBti0075457	EPgy2	GGCCCGTG	GATGGCCCGTGAAA		G	A	T	G	G	C	C	C	G	T	G	A	A	A
2L	+	2L+13003846	FBti0039121	EPgy2	CGCTGGAC	CCGCGCTGGACAGA		C	C	G	C	G	C	T	G	G	A	C	A	G	A
2L	+	2L+13021244	FBti0057765	EPgy2	AGTTGGCG	GTCAGTTGGCGGAT		G	T	C	A	G	T	T	G	G	C	G	G	A	T
2L	+	2L+13177229	FBti0027234	EPgy2	GCACGGAG	AGTGCACGGAGTTA		A	G	T	G	C	A	C	G	G	A	G	T	T	A
2L	+	2L+13203244	FBti0024897	EPgy2	GTTCACAG	CTAGTTCACAGCTA		C	T	A	G	T	T	C	A	C	A	G	C	T	A
2L	+	2L+13211584	FBti0027229	EPgy2	GTCCCACC	TAGGTCCCACCTTC		T	A	G	G	T	C	C	C	A	C	C	T	T	C
2L	+	2L+13212042	FBti0039477	EPgy2	AACTGGGG	CTGAACTGGGGCCA		C	T	G	A	A	C	T	G	G	G	G	C	C	A
2L	+	2L+13216137	FBti0039455	EPgy2	GACGGCAC	AGTGACGGCACGGT		A	G	T	G	A	C	G	G	C	A	C	G	G	T
2L	+	2L+13378562	FBti0075839	EPgy2	GTCTGAAT	CTAGTCTGAATCCT		C	T	A	G	T	C	T	G	A	A	T	C	C	T
2L	+	2L+13378869	FBti0039280	EPgy2	GGCTGACT	TTTGGCTGACTCCT		T	T	T	G	G	C	T	G	A	C	T	C	C	T
2L	+	2L+13399006	FBti0039462	EPgy2	CGCCAGTT	TGACGCCAGTTTAT		T	G	A	C	G	C	C	A	G	T	T	T	A	T
2L	+	2L+13445318	FBti0039563	EPgy2	ATCTGGCG	GGCATCTGGCGGTG		G	G	C	A	T	C	T	G	G	C	G	G	T	G
2L	+	2L+13511571	FBti0058027	EPgy2	AGCTGTGC	AACAGCTGTGCAGT		A	A	C	A	G	C	T	G	T	G	C	A	G	T
2L	+	2L+13550166	FBti0039690	EPgy2	GGGCAGAC	TCTGGGCAGACTAT		T	C	T	G	G	G	C	A	G	A	C	T	A	T
2L	+	2L+13780723	FBti0100351	EPgy2	CACCCAGC	AGGCACCCAGCCAG		A	G	G	C	A	C	C	C	A	G	C	C	A	G
2L	+	2L+13784172	FBti0076105	EPgy2	GGTATTGT	ATGGGTATTGTCCT		A	T	G	G	G	T	A	T	T	G	T	C	C	T
2L	+	2L+13832973	FBti0039326	EPgy2	GGCGGGAG	GGAGGCGGGAGTAG		G	G	A	G	G	C	G	G	G	A	G	T	A	G
2L	+	2L+13837754	FBti0040162	EPgy2	AGTGCGCC	ACTAGTGCGCCATT		A	C	T	A	G	T	G	C	G	C	C	A	T	T
2L	+	2L+14355354	FBti0039165	EPgy2	GTCGAGGC	ATCGTCGAGGCCAT		A	T	C	G	T	C	G	A	G	G	C	C	A	T
2L	+	2L+14422147	FBti0076058	EPgy2	CCACGGTT	GAACCACGGTTTGA		G	A	A	C	C	A	C	G	G	T	T	T	G	A
2L	+	2L+14490408	FBti0040238	EPgy2	GCCAAAAC	ATGGCCAAAACCGA		A	T	G	G	C	C	A	A	A	A	C	C	G	A
2L	+	2L+14706268	FBti0024063	EPgy2	GTACGACG	AATGTACGACGCGT		A	A	T	G	T	A	C	G	A	C	G	C	G	T
2L	+	2L+14972474	FBti0040265	EPgy2	ATCCAGCG	ACGATCCAGCGGAA		A	C	G	A	T	C	C	A	G	C	G	G	A	A
2L	+	2L+15039516	FBti0038755	EPgy2	ACTAAGAG	TTGACTAAGAGTGA		T	T	G	A	C	T	A	A	G	A	G	T	G	A
2L	+	2L+15248882	FBti0033141	EPgy2	GACGCACT	TTCGACGCACTACA		T	T	C	G	A	C	G	C	A	C	T	A	C	A
2L	+	2L+15333599	FBti0040119	EPgy2	GCCGAAAG	TATGCCGAAAGTAT		T	A	T	G	C	C	G	A	A	A	G	T	A	T
2L	+	2L+15758042	FBti0057653	EPgy2	GCTTGGAC	GCGGCTTGGACGTT		G	C	G	G	C	T	T	G	G	A	C	G	T	T
2L	+	2L+16234992	FBti0039797	EPgy2	CTTTACAG	ATACTTTACAGCCT		A	T	A	C	T	T	T	A	C	A	G	C	C	T
2L	+	2L+16307579	FBti0038780	EPgy2	GGTCAGTG	CCGGGTCAGTGAAA		C	C	G	G	G	T	C	A	G	T	G	A	A	A
2L	+	2L+16494092	FBti0075993	EPgy2	GTTCAAAG	TAAGTTCAAAGCGT		T	A	A	G	T	T	C	A	A	A	G	C	G	T
2L	+	2L+16601914	FBti0039230	EPgy2	GGCCAGAC	AGTGGCCAGACACC		A	G	T	G	G	C	C	A	G	A	C	A	C	C
2L	+	2L+16685360	FBti0024118	EPgy2	GTGGAACC	ATAGTGGAACCAAT		A	T	A	G	T	G	G	A	A	C	C	A	A	T
2L	+	2L+16690655	FBti0057800	EPgy2	CCCTCTTG	TGTCCCTCTTGTTA		T	G	T	C	C	C	T	C	T	T	G	T	T	A
2L	+	2L+16692375	FBti0038935	EPgy2	CCTCGGAT	ACCCCTCGGATACT		A	C	C	C	C	T	C	G	G	A	T	A	C	T
2L	+	2L+16730931	FBti0075920	EPgy2	GTTTAATA	TGAGTTTAATAGTT		T	G	A	G	T	T	T	A	A	T	A	G	T	T
2L	+	2L+16738827	FBti0025173	EPgy2	GAGCAGAG	ATGGAGCAGAGCGA		A	T	G	G	A	G	C	A	G	A	G	C	G	A
2L	+	2L+16752519	FBti0038075	EPgy2	GTACTGTC	AGAGTACTGTCTAC		A	G	A	G	T	A	C	T	G	T	C	T	A	C
2L	+	2L+16816618	FBti0040070	EPgy2	TGCTGGGT	TCGTGCTGGGTATC		T	C	G	T	G	C	T	G	G	G	T	A	T	C
2L	+	2L+16827338	FBti0057733	EPgy2	GGTTAATG	GTAGGTTAATGTGA		G	T	A	G	G	T	T	A	A	T	G	T	G	A
2L	+	2L+16879484	FBti0075981	EPgy2	GTCAGCCG	AATGTCAGCCGGGT		A	A	T	G	T	C	A	G	C	C	G	G	G	T
2L	+	2L+17473267	FBti0027157	EPgy2	CCCCAAAC	TTACCCCAAACAGT		T	T	A	C	C	C	C	A	A	A	C	A	G	T
2L	+	2L+17484561	FBti0057707	EPgy2	TTGTAGGC	AACTTGTAGGCATT		A	A	C	T	T	G	T	A	G	G	C	A	T	T
2L	+	2L+17498013	FBti0075915	EPgy2	GGTGTAGG	AAAGGTGTAGGCGC		A	A	A	G	G	T	G	T	A	G	G	C	G	C
2L	+	2L+17889372	FBti0038680	EPgy2	GACTCGCG	TACGACTCGCGCAT		T	A	C	G	A	C	T	C	G	C	G	C	A	T
2L	+	2L+18010550	FBti0076069	EPgy2	GCGCAGGC	CGCGCGCAGGCACT		C	G	C	G	C	G	C	A	G	G	C	A	C	T
2L	+	2L+18455056	FBti0039242	EPgy2	GCTTGAAA	CGTGCTTGAAATAT		C	G	T	G	C	T	T	G	A	A	A	T	A	T
2L	+	2L+18688544	FBti0038918	EPgy2	GTCCGAAC	TCAGTCCGAACAAA		T	C	A	G	T	C	C	G	A	A	C	A	A	A
2L	+	2L+18689541	FBti0033340	EPgy2	TCGTGGCC	ATCTCGTGGCCGCT		A	T	C	T	C	G	T	G	G	C	C	G	C	T
2L	+	2L+18689823	FBti0039845	EPgy2	CTGTAAAG	CCTCTGTAAAGGAT		C	C	T	C	T	G	T	A	A	A	G	G	A	T
2L	+	2L+18708881	FBti0075905	EPgy2	GCCTGGCC	AGTGCCTGGCCAAT		A	G	T	G	C	C	T	G	G	C	C	A	A	T
2L	+	2L+18733118	FBti0076041	EPgy2	GTACAAAT	TATGTACAAATATT		T	A	T	G	T	A	C	A	A	A	T	A	T	T
2L	+	2L+18820545	FBti0039297	EPgy2	ATCGAACC	GCCATCGAACCGAA		G	C	C	A	T	C	G	A	A	C	C	G	A	A
2L	+	2L+18845071	FBti0057652	EPgy2	GTCCAGCT	ACAGTCCAGCTAGT		A	C	A	G	T	C	C	A	G	C	T	A	G	T
2L	+	2L+19009254	FBti0038888	EPgy2	CCCCGTAC	ATGCCCCGTACAAT		A	T	G	C	C	C	C	G	T	A	C	A	A	T
2L	+	2L+19045388	FBti0076070	EPgy2	GGCTACGC	ACAGGCTACGCCTA		A	C	A	G	G	C	T	A	C	G	C	C	T	A
2L	+	2L+19054373	FBti0038991	EPgy2	CCCTCTGC	ATGCCCTCTGCGAT		A	T	G	C	C	C	T	C	T	G	C	G	A	T
2L	+	2L+19142365	FBti0027123	EPgy2	CTCTACTG	TAGCTCTACTGTTT		T	A	G	C	T	C	T	A	C	T	G	T	T	T
2L	+	2L+19158440	FBti0027058	EPgy2	ATACACAA	AATATACACAATAT		A	A	T	A	T	A	C	A	C	A	A	T	A	T
2L	+	2L+19186103	FBti0033357	EPgy2	GTCCAGGT	AATGTCCAGGTCAT		A	A	T	G	T	C	C	A	G	G	T	C	A	T
2L	+	2L+19190322	FBti0039787	EPgy2	GTCTGAGG	GTGGTCTGAGGACG		G	T	G	G	T	C	T	G	A	G	G	A	C	G
2L	+	2L+19425092	FBti0033138	EPgy2	GGCCAGAT	TTGGGCCAGATCCT		T	T	G	G	G	C	C	A	G	A	T	C	C	T
2L	+	2L+19549681	FBti0024087	EPgy2	GTGCGAAG	CTAGTGCGAAGTAA		C	T	A	G	T	G	C	G	A	A	G	T	A	A
2L	+	2L+19577747	FBti0057599	EPgy2	GATCGCAG	TTGGATCGCAGATT		T	T	G	G	A	T	C	G	C	A	G	A	T	T
2L	+	2L+19587185	FBti0039596	EPgy2	GCGCAGCA	GCTGCGCAGCACGA		G	C	T	G	C	G	C	A	G	C	A	C	G	A
2L	+	2L+19590458	FBti0075871	EPgy2	AGCCAACT	GAGAGCCAACTGCA		G	A	G	A	G	C	C	A	A	C	T	G	C	A
2L	+	2L+19756924	FBti0039408	EPgy2	GCCCAGCC	GAGGCCCAGCCTGT		G	A	G	G	C	C	C	A	G	C	C	T	G	T
2L	+	2L+19764147	FBti0076095	EPgy2	CTTCAGAC	TTTCTTCAGACCGT		T	T	T	C	T	T	C	A	G	A	C	C	G	T
2L	+	2L+19865481	FBti0038795	EPgy2	GCGTGGAT	TCAGCGTGGATGAA		T	C	A	G	C	G	T	G	G	A	T	G	A	A
2L	+	2L+19935244	FBti0024079	EPgy2	TGATATAT	TAATGATATATTTG		T	A	A	T	G	A	T	A	T	A	T	T	T	G
2L	+	2L+19958702	FBti0039248	EPgy2	GAGCCAAT	AGAGAGCCAATCCG		A	G	A	G	A	G	C	C	A	A	T	C	C	G
2L	+	2L+20091644	FBti0058010	EPgy2	GGCTGGCC	GTCGGCTGGCCTCA		G	T	C	G	G	C	T	G	G	C	C	T	C	A
2L	+	2L+20104687	FBti0039298	EPgy2	CAGAGCCG	TGTCAGAGCCGCAG		T	G	T	C	A	G	A	G	C	C	G	C	A	G
2L	+	2L+20209258	FBti0075845	EPgy2	CACTAGAC	CATCACTAGACAAT		C	A	T	C	A	C	T	A	G	A	C	A	A	T
2L	+	2L+20243017	FBti0038740	EPgy2	CCGCATAT	AAACCGCATATCGA		A	A	A	C	C	G	C	A	T	A	T	C	G	A
2L	+	2L+20350028	FBti0027314	EPgy2	GGTCACTC	AGTGGTCACTCTAA		A	G	T	G	G	T	C	A	C	T	C	T	A	A
2L	+	2L+20414763	FBti0075460	EPgy2	CTCCAGCA	AAGCTCCAGCAACC		A	A	G	C	T	C	C	A	G	C	A	A	C	C
2L	+	2L+20416684	FBti0075956	EPgy2	GACCAGAT	AAAGACCAGATAGC		A	A	A	G	A	C	C	A	G	A	T	A	G	C
2L	+	2L+20429081	FBti0040006	EPgy2	AGACTCTC	ATAAGACTCTCCAT		A	T	A	A	G	A	C	T	C	T	C	C	A	T
2L	+	2L+20645781	FBti0024080	EPgy2	GTCTGAAA	AATGTCTGAAAGGA		A	A	T	G	T	C	T	G	A	A	A	G	G	A
2L	+	2L+20656443	FBti0033218	EPgy2	TCATGGCG	TTATCATGGCGATT		T	T	A	T	C	A	T	G	G	C	G	A	T	T
2L	+	2L+20675805	FBti0038952	EPgy2	GTGAGGAG	AAAGTGAGGAGCTC		A	A	A	G	T	G	A	G	G	A	G	C	T	C
2L	+	2L+20734941	FBti0033349	EPgy2	TTTCAGGG	ACATTTCAGGGTTT		A	C	A	T	T	T	C	A	G	G	G	T	T	T
2L	+	2L+20758190	FBti0040207	EPgy2	AAACACAT	AACAAACACATCAA		A	A	C	A	A	A	C	A	C	A	T	C	A	A
2L	+	2L+20787944	FBti0039345	EPgy2	AGCCACGG	ATTAGCCACGGGGC		A	T	T	A	G	C	C	A	C	G	G	G	G	C
2L	+	2L+20829403	FBti0039763	EPgy2	GTTCGTTC	TCAGTTCGTTCGTT		T	C	A	G	T	T	C	G	T	T	C	G	T	T
2L	+	2L+20831247	FBti0057745	EPgy2	GCCTGTTG	TCCGCCTGTTGTGA		T	C	C	G	C	C	T	G	T	T	G	T	G	A
2L	+	2L+20911196	FBti0038082	EPgy2	GTCTGCTG	CAAGTCTGCTGCAG		C	A	A	G	T	C	T	G	C	T	G	C	A	G
2L	+	2L+20970932	FBti0027093	EPgy2	GGTCAAAG	TCGGGTCAAAGTAA		T	C	G	G	G	T	C	A	A	A	G	T	A	A
2L	+	2L+20986146	FBti0039322	EPgy2	GTTTGGCC	TCGGTTTGGCCATA		T	C	G	G	T	T	T	G	G	C	C	A	T	A
2L	+	2L+21102735	FBti0039942	EPgy2	AGCTGGTG	TCCAGCTGGTGCAA		T	C	C	A	G	C	T	G	G	T	G	C	A	A
2L	+	2L+21108539	FBti0040222	EPgy2	CTATCGAT	ATACTATCGATTGT		A	T	A	C	T	A	T	C	G	A	T	T	G	T
2L	+	2L+21154017	FBti0040172	EPgy2	TGTCAAAC	CTATGTCAAACGCA		C	T	A	T	G	T	C	A	A	A	C	G	C	A
2L	+	2L+21198809	FBti0027036	EPgy2	TCTTGTGC	ATGTCTTGTGCATT		A	T	G	T	C	T	T	G	T	G	C	A	T	T
2L	+	2L+21206333	FBti0039934	EPgy2	GGCGTGAG	AATGGCGTGAGAAT		A	A	T	G	G	C	G	T	G	A	G	A	A	T
2L	+	2L+21221280	FBti0040078	EPgy2	ACCTGACC	ATCACCTGACCAAT		A	T	C	A	C	C	T	G	A	C	C	A	A	T
2L	+	2L+21261549	FBti0039706	EPgy2	GCTCAACC	TAGGCTCAACCTCT		T	A	G	G	C	T	C	A	A	C	C	T	C	T
2L	+	2L+21339266	FBti0058026	EPgy2	TTCTGAGC	TTCTTCTGAGCGGC		T	T	C	T	T	C	T	G	A	G	C	G	G	C
2L	+	2L+21344620	FBti0075864	EPgy2	GCCTGCGC	TGTGCCTGCGCAAT		T	G	T	G	C	C	T	G	C	G	C	A	A	T
2L	+	2L+21573389	FBti0039799	EPgy2	CTTCAGTC	TAACTTCAGTCGGA		T	A	A	C	T	T	C	A	G	T	C	G	G	A
2L	+	2L+21608781	FBti0057859	EPgy2	AACCCGAG	TGAAACCCGAGTAC		T	G	A	A	A	C	C	C	G	A	G	T	A	C
2L	+	2L+21633403	FBti0039815	EPgy2	GCCCACGG	TATGCCCACGGCAG		T	A	T	G	C	C	C	A	C	G	G	C	A	G
2L	+	2L+21659019	FBti0039895	EPgy2	GTCCAGTC	ACCGTCCAGTCTGT		A	C	C	G	T	C	C	A	G	T	C	T	G	T
2L	+	2L+22116735	FBti0038737	EPgy2	AGTTGAAC	CTCAGTTGAACTAT		C	T	C	A	G	T	T	G	A	A	C	T	A	T
2L	+	2L+22131411	FBti0024854	EPgy2	CGGAAGAA	AATCGGAAGAAGCA		A	A	T	C	G	G	A	A	G	A	A	G	C	A
2L	+	2L+22263176	FBti0039595	EPgy2	GCTCAGAC	TTAGCTCAGACTTA		T	T	A	G	C	T	C	A	G	A	C	T	T	A
2LHet	+	2LHet+32827	FBti0075445	EPgy2	TTTATAAC	ATATTTATAACTAT		A	T	A	T	T	T	A	T	A	A	C	T	A	T
2R	+	2R+37990	FBti0075443	EPgy2	GACATGCC	GTGGACATGCCTGT		G	T	G	G	A	C	A	T	G	C	C	T	G	T
2R	+	2R+129637	FBti0040099	EPgy2	CGCCAAAG	ATACGCCAAAGGCT		A	T	A	C	G	C	C	A	A	A	G	G	C	T
2R	+	2R+1589631	FBti0039835	EPgy2	GCCCACCC	TTCGCCCACCCCTT		T	T	C	G	C	C	C	A	C	C	C	C	T	T
2R	+	2R+1614807	FBti0027191	EPgy2	GGACGGCG	TTCGGACGGCGTAA		T	T	C	G	G	A	C	G	G	C	G	T	A	A
2R	+	2R+1642040	FBti0039865	EPgy2	TGCGGAAT	AATTGCGGAATTCT		A	A	T	T	G	C	G	G	A	A	T	T	C	T
2R	+	2R+1781309	FBti0039185	EPgy2	GCTCTTTG	TTCGCTCTTTGCTC		T	T	C	G	C	T	C	T	T	T	G	C	T	C
2R	+	2R+1822798	FBti0057701	EPgy2	GGCTGTGC	AATGGCTGTGCTGT		A	A	T	G	G	C	T	G	T	G	C	T	G	T
2R	+	2R+1883269	FBti0039775	EPgy2	ACGCAGCC	AACACGCAGCCAGT		A	A	C	A	C	G	C	A	G	C	C	A	G	T
2R	+	2R+1905263	FBti0039860	EPgy2	ATCCGTGA	AGCATCCGTGATGC		A	G	C	A	T	C	C	G	T	G	A	T	G	C
2R	+	2R+2102079	FBti0040220	EPgy2	AGTCAAAG	AAAAGTCAAAGTTT		A	A	A	A	G	T	C	A	A	A	G	T	T	T
2R	+	2R+2115164	FBti0076090	EPgy2	GCTGAGCT	ATGGCTGAGCTAAG		A	T	G	G	C	T	G	A	G	C	T	A	A	G
2R	+	2R+2129510	FBti0039886	EPgy2	GACAGTAC	TTGGACAGTACTGA		T	T	G	G	A	C	A	G	T	A	C	T	G	A
2R	+	2R+2462791	FBti0038998	EPgy2	CTTTGGCC	AAACTTTGGCCGTA		A	A	A	C	T	T	T	G	G	C	C	G	T	A
2R	+	2R+2476844	FBti0025184	EPgy2	CGGAGTGA	GGACGGAGTGAGGG		G	G	A	C	G	G	A	G	T	G	A	G	G	G
2R	+	2R+2519058	FBti0039905	EPgy2	GCTTGGCC	TTCGCTTGGCCAGC		T	T	C	G	C	T	T	G	G	C	C	A	G	C
2R	+	2R+2521399	FBti0076017	EPgy2	CACGGTCA	TCACACGGTCATAT		T	C	A	C	A	C	G	G	T	C	A	T	A	T
2R	+	2R+2538006	FBti0040059	EPgy2	GATTAAAG	TTCGATTAAAGAAA		T	T	C	G	A	T	T	A	A	A	G	A	A	A
2R	+	2R+2542555	FBti0039576	EPgy2	TGCATATG	AGGTGCATATGCTT		A	G	G	T	G	C	A	T	A	T	G	C	T	T
2R	+	2R+2584285	FBti0039675	EPgy2	AGCCAAAC	AGCAGCCAAACAGC		A	G	C	A	G	C	C	A	A	A	C	A	G	C
2R	+	2R+2629353	FBti0040280	EPgy2	GTCTAAAC	ACAGTCTAAACTGA		A	C	A	G	T	C	T	A	A	A	C	T	G	A
2R	+	2R+2695150	FBti0040273	EPgy2	CTCTCGAT	ATACTCTCGATTGC		A	T	A	C	T	C	T	C	G	A	T	T	G	C
2R	+	2R+2741088	FBti0024070	EPgy2	AGTCGGGA	AGGAGTCGGGACAA		A	G	G	A	G	T	C	G	G	G	A	C	A	A
2R	+	2R+2873321	FBti0039879	EPgy2	GGCCACGC	AAAGGCCACGCGAT		A	A	A	G	G	C	C	A	C	G	C	G	A	T
2R	+	2R+2880163	FBti0033209	EPgy2	GCCCAGCG	AAAGCCCAGCGATT		A	A	A	G	C	C	C	A	G	C	G	A	T	T
2R	+	2R+2898752	FBti0024090	EPgy2	TGCAGAAC	AAATGCAGAACCTA		A	A	A	T	G	C	A	G	A	A	C	C	T	A
2R	+	2R+2900604	FBti0024853	EPgy2	CCCCGACA	TCCCCCCGACATGT		T	C	C	C	C	C	C	G	A	C	A	T	G	T
2R	+	2R+2912513	FBti0039891	EPgy2	GAGTCCCG	GTTGAGTCCCGTTA		G	T	T	G	A	G	T	C	C	C	G	T	T	A
2R	+	2R+2933265	FBti0039528	EPgy2	GTTCAAAT	ATCGTTCAAATTGA		A	T	C	G	T	T	C	A	A	A	T	T	G	A
2R	+	2R+2937325	FBti0027153	EPgy2	AGCAGGTC	AAGAGCAGGTCCTT		A	A	G	A	G	C	A	G	G	T	C	C	T	T
2R	+	2R+3142103	FBti0057855	EPgy2	TGCTGAAC	GTGTGCTGAACACA		G	T	G	T	G	C	T	G	A	A	C	A	C	A
2R	+	2R+3254159	FBti0025224	EPgy2	ATCTCGAT	AAGATCTCGATCGA		A	A	G	A	T	C	T	C	G	A	T	C	G	A
2R	+	2R+3379865	FBti0057844	EPgy2	GATCAGAG	TCAGATCAGAGTAA		T	C	A	G	A	T	C	A	G	A	G	T	A	A
2R	+	2R+3380395	FBti0057906	EPgy2	TGCTAAAC	CGCTGCTAAACACT		C	G	C	T	G	C	T	A	A	A	C	A	C	T
2R	+	2R+3454348	FBti0038938	EPgy2	ACTCAGAC	ATGACTCAGACCAC		A	T	G	A	C	T	C	A	G	A	C	C	A	C
2R	+	2R+3477769	FBti0039652	EPgy2	GGTGAAAT	AATGGTGAAATAAT		A	A	T	G	G	T	G	A	A	A	T	A	A	T
2R	+	2R+3667040	FBti0039594	EPgy2	CTCCAGTC	CAGCTCCAGTCATA		C	A	G	C	T	C	C	A	G	T	C	A	T	A
2R	+	2R+3679066	FBti0033205	EPgy2	CGACTGAG	ACGCGACTGAGTTT		A	C	G	C	G	A	C	T	G	A	G	T	T	T
2R	+	2R+3693807	FBti0027317	EPgy2	AGTAGAGG	ATAAGTAGAGGCAT		A	T	A	A	G	T	A	G	A	G	G	C	A	T
2R	+	2R+3860092	FBti0039936	EPgy2	CGCTCACC	AGACGCTCACCACT		A	G	A	C	G	C	T	C	A	C	C	A	C	T
2R	+	2R+4050912	FBti0057958	EPgy2	GTATACAC	ATTGTATACACCAT		A	T	T	G	T	A	T	A	C	A	C	C	A	T
2R	+	2R+4125319	FBti0040052	EPgy2	GACTGGTC	ATGGACTGGTCAGT		A	T	G	G	A	C	T	G	G	T	C	A	G	T
2R	+	2R+4212384	FBti0039182	EPgy2	GTCCAGCA	ATTGTCCAGCACAT		A	T	T	G	T	C	C	A	G	C	A	C	A	T
2R	+	2R+4332242	FBti0038907	EPgy2	CTCGCGAC	ATACTCGCGACTCT		A	T	A	C	T	C	G	C	G	A	C	T	C	T
2R	+	2R+4487076	FBti0024890	EPgy2	CTCCCCAT	ATCCTCCCCATCAT		A	T	C	C	T	C	C	C	C	A	T	C	A	T
2R	+	2R+4487949	FBti0039716	EPgy2	GTTCCAGC	TTTGTTCCAGCCCC		T	T	T	G	T	T	C	C	A	G	C	C	C	C
2R	+	2R+4553619	FBti0039872	EPgy2	GCTTTGTC	CCTGCTTTGTCTCT		C	C	T	G	C	T	T	T	G	T	C	T	C	T
2R	+	2R+4611301	FBti0039571	EPgy2	GTCAAAGG	AAAGTCAAAGGCAA		A	A	A	G	T	C	A	A	A	G	G	C	A	A
2R	+	2R+4611784	FBti0039601	EPgy2	GTTTGAGT	TTGGTTTGAGTCTT		T	T	G	G	T	T	T	G	A	G	T	C	T	T
2R	+	2R+4623304	FBti0025136	EPgy2	GGCCACCC	ATAGGCCACCCCTA		A	T	A	G	G	C	C	A	C	C	C	C	T	A
2R	+	2R+4685811	FBti0038799	EPgy2	CCTCGCAG	TTACCTCGCAGGCA		T	T	A	C	C	T	C	G	C	A	G	G	C	A
2R	+	2R+4781171	FBti0100382	EPgy2	ATCCATAT	ATTATCCATATATT		A	T	T	A	T	C	C	A	T	A	T	A	T	T
2R	+	2R+4980468	FBti0027096	EPgy2	GTATGAGC	ATAGTATGAGCAGA		A	T	A	G	T	A	T	G	A	G	C	A	G	A
2R	+	2R+5004141	FBti0039654	EPgy2	CATTCAGG	AGGCATTCAGGCTT		A	G	G	C	A	T	T	C	A	G	G	C	T	T
2R	+	2R+5134936	FBti0038697	EPgy2	GTACAAAA	AGCGTACAAAATAT		A	G	C	G	T	A	C	A	A	A	A	T	A	T
2R	+	2R+5180319	FBti0057696	EPgy2	CGCCAGCG	CTACGCCAGCGTGT		C	T	A	C	G	C	C	A	G	C	G	T	G	T
2R	+	2R+5311616	FBti0100361	EPgy2	GTGTATAC	ATAGTGTATACTAT		A	T	A	G	T	G	T	A	T	A	C	T	A	T
2R	+	2R+5314842	FBti0024918	EPgy2	GGCTGGTC	GCCGGCTGGTCTAC		G	C	C	G	G	C	T	G	G	T	C	T	A	C
2R	+	2R+5453934	FBti0039312	EPgy2	CATAAAAT	AAACATAAAATGAT		A	A	A	C	A	T	A	A	A	A	T	G	A	T
2R	+	2R+5466170	FBti0027321	EPgy2	ACAGAGCC	ATCACAGAGCCTAT		A	T	C	A	C	A	G	A	G	C	C	T	A	T
2R	+	2R+5471724	FBti0033265	EPgy2	GGCCAGTG	GTTGGCCAGTGTTG		G	T	T	G	G	C	C	A	G	T	G	T	T	G
2R	+	2R+5497935	FBti0025155	EPgy2	GGCCCCGC	TGGGGCCCCGCCTT		T	G	G	G	G	C	C	C	C	G	C	C	T	T
2R	+	2R+5724214	FBti0027243	EPgy2	GTCCAGGG	ACGGTCCAGGGCGC		A	C	G	G	T	C	C	A	G	G	G	C	G	C
2R	+	2R+5729029	FBti0039592	EPgy2	CTTTCGGC	TGCCTTTCGGCCAA		T	G	C	C	T	T	T	C	G	G	C	C	A	A
2R	+	2R+5779477	FBti0024912	EPgy2	GCCTGTAC	CGAGCCTGTACAAG		C	G	A	G	C	C	T	G	T	A	C	A	A	G
2R	+	2R+5876679	FBti0040054	EPgy2	GGTTGTAT	TTTGGTTGTATATT		T	T	T	G	G	T	T	G	T	A	T	A	T	T
2R	+	2R+5914267	FBti0039827	EPgy2	GCCTGGGG	ACAGCCTGGGGCAA		A	C	A	G	C	C	T	G	G	G	G	C	A	A
2R	+	2R+5933038	FBti0057789	EPgy2	GCCATGGG	ATGGCCATGGGCTT		A	T	G	G	C	C	A	T	G	G	G	C	T	T
2R	+	2R+5939947	FBti0024881	EPgy2	GTTCAAAG	ATCGTTCAAAGAGA		A	T	C	G	T	T	C	A	A	A	G	A	G	A
2R	+	2R+5987228	FBti0039931	EPgy2	GGCGCTAC	TTAGGCGCTACCAC		T	T	A	G	G	C	G	C	T	A	C	C	A	C
2R	+	2R+5998381	FBti0076114	EPgy2	CCTCAATT	TTACCTCAATTGCT		T	T	A	C	C	T	C	A	A	T	T	G	C	T
2R	+	2R+6005276	FBti0038876	EPgy2	GATCACAC	ATCGATCACACTTT		A	T	C	G	A	T	C	A	C	A	C	T	T	T
2R	+	2R+6012859	FBti0040090	EPgy2	GGCTGGCG	CAGGGCTGGCGATA		C	A	G	G	G	C	T	G	G	C	G	A	T	A
2R	+	2R+6029883	FBti0027033	EPgy2	CCCTGGGC	GCGCCCTGGGCGAT		G	C	G	C	C	C	T	G	G	G	C	G	A	T
2R	+	2R+6040612	FBti0038821	EPgy2	GGCGGAGT	TTGGGCGGAGTTGT		T	T	G	G	G	C	G	G	A	G	T	T	G	T
2R	+	2R+6118600	FBti0033318	EPgy2	CTTCACAC	AAACTTCACACCTA		A	A	A	C	T	T	C	A	C	A	C	C	T	A
2R	+	2R+6125289	FBti0076417	EPgy2	CGCGGAAG	GTACGCGGAAGAAA		G	T	A	C	G	C	G	G	A	A	G	A	A	A
2R	+	2R+6126006	FBti0076416	EPgy2	GTTTTGGC	TTGGTTTTGGCCAA		T	T	G	G	T	T	T	T	G	G	C	C	A	A
2R	+	2R+6166754	FBti0076011	EPgy2	CCCCAAAG	TGACCCCAAAGGAT		T	G	A	C	C	C	C	A	A	A	G	G	A	T
2R	+	2R+6189789	FBti0039750	EPgy2	CTCCAGAG	GGACTCCAGAGCTT		G	G	A	C	T	C	C	A	G	A	G	C	T	T
2R	+	2R+6316089	FBti0039015	EPgy2	GTCGAGGA	GCAGTCGAGGACAT		G	C	A	G	T	C	G	A	G	G	A	C	A	T
2R	+	2R+6325685	FBti0027338	EPgy2	GTTGAGCC	TGAGTTGAGCCTTT		T	G	A	G	T	T	G	A	G	C	C	T	T	T
2R	+	2R+6357420	FBti0075910	EPgy2	GTGTAGGG	CTGGTGTAGGGTCA		C	T	G	G	T	G	T	A	G	G	G	T	C	A
2R	+	2R+6366096	FBti0033380	EPgy2	GGTTGCAC	GCAGGTTGCACCAT		G	C	A	G	G	T	T	G	C	A	C	C	A	T
2R	+	2R+6366896	FBti0039390	EPgy2	CTACAATC	CACCTACAATCCCA		C	A	C	C	T	A	C	A	A	T	C	C	C	A
2R	+	2R+6447242	FBti0039970	EPgy2	CGTCGCGC	GCGCGTCGCGCTCT		G	C	G	C	G	T	C	G	C	G	C	T	C	T
2R	+	2R+6505139	FBti0025276	EPgy2	GCCACACG	ACAGCCACACGCGA		A	C	A	G	C	C	A	C	A	C	G	C	G	A
2R	+	2R+6533156	FBti0038901	EPgy2	GTCAGGGG	TGTGTCAGGGGACT		T	G	T	G	T	C	A	G	G	G	G	A	C	T
2R	+	2R+6692744	FBti0027604	EPgy2	AGCAAGAG	AAGAGCAAGAGCGT		A	A	G	A	G	C	A	A	G	A	G	C	G	T
2R	+	2R+6707463	FBti0024135	EPgy2	CTTCAACC	TTACTTCAACCTAA		T	T	A	C	T	T	C	A	A	C	C	T	A	A
2R	+	2R+6710414	FBti0039208	EPgy2	CCTTGCGT	CTACCTTGCGTTAA		C	T	A	C	C	T	T	G	C	G	T	T	A	A
2R	+	2R+6766369	FBti0025218	EPgy2	ATTTGTGT	AACATTTGTGTCGA		A	A	C	A	T	T	T	G	T	G	T	C	G	A
2R	+	2R+6772272	FBti0038944	EPgy2	GAACCCTC	GATGAACCCTCCAC		G	A	T	G	A	A	C	C	C	T	C	C	A	C
2R	+	2R+6931597	FBti0038085	EPgy2	ATCTGGAA	ACAATCTGGAATTT		A	C	A	A	T	C	T	G	G	A	A	T	T	T
2R	+	2R+6936923	FBti0038992	EPgy2	GTACTAAC	AACGTACTAACCAA		A	A	C	G	T	A	C	T	A	A	C	C	A	A
2R	+	2R+7085853	FBti0039660	EPgy2	GCCTGATA	ATGGCCTGATAACT		A	T	G	G	C	C	T	G	A	T	A	A	C	T
2R	+	2R+7254271	FBti0057669	EPgy2	CTCCAAGT	TTTCTCCAAGTATT		T	T	T	C	T	C	C	A	A	G	T	A	T	T
2R	+	2R+7335043	FBti0039167	EPgy2	GTATAGGT	AGGGTATAGGTATC		A	G	G	G	T	A	T	A	G	G	T	A	T	C
2R	+	2R+7469706	FBti0038871	EPgy2	GAACGATG	GGGGAACGATGCGA		G	G	G	G	A	A	C	G	A	T	G	C	G	A
2R	+	2R+7524817	FBti0033196	EPgy2	CTCTGGCA	TTGCTCTGGCACCT		T	T	G	C	T	C	T	G	G	C	A	C	C	T
2R	+	2R+7713496	FBti0038767	EPgy2	GTTACGAC	GTAGTTACGACAAC		G	T	A	G	T	T	A	C	G	A	C	A	A	C
2R	+	2R+7779598	FBti0039971	EPgy2	GTGCGATA	ATGGTGCGATATAT		A	T	G	G	T	G	C	G	A	T	A	T	A	T
2R	+	2R+7876637	FBti0076116	EPgy2	GCTCAGCC	ACAGCTCAGCCAGA		A	C	A	G	C	T	C	A	G	C	C	A	G	A
2R	+	2R+7915520	FBti0039333	EPgy2	GTGCGGCG	ATCGTGCGGCGAAT		A	T	C	G	T	G	C	G	G	C	G	A	A	T
2R	+	2R+7926557	FBti0033126	EPgy2	ATCTAGCT	GGTATCTAGCTCAT		G	G	T	A	T	C	T	A	G	C	T	C	A	T
2R	+	2R+7960386	FBti0057708	EPgy2	CCTGGTGC	GCGCCTGGTGCGAA		G	C	G	C	C	T	G	G	T	G	C	G	A	A
2R	+	2R+8028354	FBti0027590	EPgy2	GTTCGGCC	ATGGTTCGGCCTGA		A	T	G	G	T	T	C	G	G	C	C	T	G	A
2R	+	2R+8028751	FBti0027306	EPgy2	GTGTAGCC	GAGGTGTAGCCATA		G	A	G	G	T	G	T	A	G	C	C	A	T	A
2R	+	2R+8033243	FBti0076062	EPgy2	TGCTGCCC	TTCTGCTGCCCCCT		T	T	C	T	G	C	T	G	C	C	C	C	C	T
2R	+	2R+8038108	FBti0040142	EPgy2	CTTGAAAC	AAACTTGAAACGAA		A	A	A	C	T	T	G	A	A	A	C	G	A	A
2R	+	2R+8061862	FBti0027231	EPgy2	CACTCCAC	ATGCACTCCACATT		A	T	G	C	A	C	T	C	C	A	C	A	T	T
2R	+	2R+8066012	FBti0057767	EPgy2	CTCCAGGG	AGGCTCCAGGGGAT		A	G	G	C	T	C	C	A	G	G	G	G	A	T
2R	+	2R+8146865	FBti0039984	EPgy2	ATATGCAT	ATTATATGCATATA		A	T	T	A	T	A	T	G	C	A	T	A	T	A
2R	+	2R+8213883	FBti0025225	EPgy2	GTTCGGAC	TAAGTTCGGACAAG		T	A	A	G	T	T	C	G	G	A	C	A	A	G
2R	+	2R+8222847	FBti0039156	EPgy2	GTCTATAG	ATCGTCTATAGCCA		A	T	C	G	T	C	T	A	T	A	G	C	C	A
2R	+	2R+8311336	FBti0038925	EPgy2	GCGCTGAC	AAAGCGCTGACCAT		A	A	A	G	C	G	C	T	G	A	C	C	A	T
2R	+	2R+8313102	FBti0038909	EPgy2	GCGAGCTT	TACGCGAGCTTTCT		T	A	C	G	C	G	A	G	C	T	T	T	C	T
2R	+	2R+8401962	FBti0038691	EPgy2	GCCCTGCC	AAAGCCCTGCCCTG		A	A	A	G	C	C	C	T	G	C	C	C	T	G
2R	+	2R+8457928	FBti0057678	EPgy2	CGCTGCGG	TCGCGCTGCGGCAT		T	C	G	C	G	C	T	G	C	G	G	C	A	T
2R	+	2R+8459552	FBti0038861	EPgy2	GACTGCAT	ATAGACTGCATTTT		A	T	A	G	A	C	T	G	C	A	T	T	T	T
2R	+	2R+8474654	FBti0076135	EPgy2	GTCTGTAC	TGTGTCTGTACACA		T	G	T	G	T	C	T	G	T	A	C	A	C	A
2R	+	2R+8574877	FBti0038790	EPgy2	GGTCGAGC	TTCGGTCGAGCGAT		T	T	C	G	G	T	C	G	A	G	C	G	A	T
2R	+	2R+8668001	FBti0039998	EPgy2	CTTTTAAC	AAGCTTTTAACATA		A	A	G	C	T	T	T	T	A	A	C	A	T	A
2R	+	2R+8732158	FBti0039170	EPgy2	AACCAGAT	AACAACCAGATCCA		A	A	C	A	A	C	C	A	G	A	T	C	C	A
2R	+	2R+8757749	FBti0040166	EPgy2	ATACAGTC	GACATACAGTCCTA		G	A	C	A	T	A	C	A	G	T	C	C	T	A
2R	+	2R+8803798	FBti0039953	EPgy2	GCTAGGCC	AGCGCTAGGCCGAA		A	G	C	G	C	T	A	G	G	C	C	G	A	A
2R	+	2R+8811290	FBti0075979	EPgy2	AGCGGAAC	AGAAGCGGAACAAT		A	G	A	A	G	C	G	G	A	A	C	A	A	T
2R	+	2R+8813480	FBti0040158	EPgy2	GCTCGGAG	ACTGCTCGGAGTTT		A	C	T	G	C	T	C	G	G	A	G	T	T	T
2R	+	2R+8867226	FBti0040093	EPgy2	GGATGGTG	TGTGGATGGTGTGG		T	G	T	G	G	A	T	G	G	T	G	T	G	G
2R	+	2R+8884664	FBti0058049	EPgy2	GGCCAGGC	AGGGGCCAGGCCAT		A	G	G	G	G	C	C	A	G	G	C	C	A	T
2R	+	2R+9045753	FBti0038095	EPgy2	TGCCAGTT	GAGTGCCAGTTGAA		G	A	G	T	G	C	C	A	G	T	T	G	A	A
2R	+	2R+9059165	FBti0038849	EPgy2	TATATATA	ATATATATATATTT		A	T	A	T	A	T	A	T	A	T	A	T	T	T
2R	+	2R+9102224	FBti0040160	EPgy2	ACTCGATC	ATAACTCGATCAGT		A	T	A	A	C	T	C	G	A	T	C	A	G	T
2R	+	2R+9110762	FBti0039578	EPgy2	GTTCAACT	GATGTTCAACTGGT		G	A	T	G	T	T	C	A	A	C	T	G	G	T
2R	+	2R+9291286	FBti0075854	EPgy2	GATTGAGG	AAGGATTGAGGGAC		A	A	G	G	A	T	T	G	A	G	G	G	A	C
2R	+	2R+9327320	FBti0039266	EPgy2	GCCTGAAC	AAGGCCTGAACTAA		A	A	G	G	C	C	T	G	A	A	C	T	A	A
2R	+	2R+9395073	FBti0039937	EPgy2	GTCGAGAT	AACGTCGAGATGTG		A	A	C	G	T	C	G	A	G	A	T	G	T	G
2R	+	2R+9397154	FBti0033315	EPgy2	ACACAAAC	GATACACAAACTAT		G	A	T	A	C	A	C	A	A	A	C	T	A	T
2R	+	2R+9445652	FBti0039774	EPgy2	ATCCTGGT	ATAATCCTGGTTGT		A	T	A	A	T	C	C	T	G	G	T	T	G	T
2R	+	2R+9471717	FBti0057979	EPgy2	TTCTTCAT	ACTTTCTTCATTGT		A	C	T	T	T	C	T	T	C	A	T	T	G	T
2R	+	2R+9510515	FBti0025133	EPgy2	GTTATGTG	AATGTTATGTGTTT		A	A	T	G	T	T	A	T	G	T	G	T	T	T
2R	+	2R+9603960	FBti0038731	EPgy2	GAATGTGC	AACGAATGTGCCGC		A	A	C	G	A	A	T	G	T	G	C	C	G	C
2R	+	2R+9653292	FBti0039261	EPgy2	GTTTGCAC	TTCGTTTGCACAAT		T	T	C	G	T	T	T	G	C	A	C	A	A	T
2R	+	2R+9711635	FBti0039680	EPgy2	CTCTTGGC	CGCCTCTTGGCCAT		C	G	C	C	T	C	T	T	G	G	C	C	A	T
2R	+	2R+9727895	FBti0100365	EPgy2	GCGCGACC	TTAGCGCGACCCAT		T	T	A	G	C	G	C	G	A	C	C	C	A	T
2R	+	2R+9829722	FBti0024926	EPgy2	GCTTTTCC	TCCGCTTTTCCGTT		T	C	C	G	C	T	T	T	T	C	C	G	T	T
2R	+	2R+9845753	FBti0025289	EPgy2	ACCCAAAC	ATAACCCAAACAAA		A	T	A	A	C	C	C	A	A	A	C	A	A	A
2R	+	2R+9848196	FBti0033328	EPgy2	GTTTCGCT	TCTGTTTCGCTCTT		T	C	T	G	T	T	T	C	G	C	T	C	T	T
2R	+	2R+9852144	FBti0033356	EPgy2	GTTATTAC	ATTGTTATTACCTA		A	T	T	G	T	T	A	T	T	A	C	C	T	A
2R	+	2R+9881666	FBti0027247	EPgy2	AATCGGAC	AGCAATCGGACGGT		A	G	C	A	A	T	C	G	G	A	C	G	G	T
2R	+	2R+9914925	FBti0039548	EPgy2	CGTTCAAC	CCACGTTCAACGGC		C	C	A	C	G	T	T	C	A	A	C	G	G	C
2R	+	2R+10058028	FBti0039371	EPgy2	CTTCAGTG	TTACTTCAGTGCAG		T	T	A	C	T	T	C	A	G	T	G	C	A	G
2R	+	2R+10058837	FBti0039217	EPgy2	CACTAGAT	AAGCACTAGATGTT		A	A	G	C	A	C	T	A	G	A	T	G	T	T
2R	+	2R+10190264	FBti0038842	EPgy2	GTATGCAT	CATGTATGCATGTA		C	A	T	G	T	A	T	G	C	A	T	G	T	A
2R	+	2R+10219827	FBti0040181	EPgy2	GTCTGAAC	GCGGTCTGAACGCT		G	C	G	G	T	C	T	G	A	A	C	G	C	T
2R	+	2R+10247833	FBti0075838	EPgy2	GTTTATCT	TTTGTTTATCTTAT		T	T	T	G	T	T	T	A	T	C	T	T	A	T
2R	+	2R+10250566	FBti0039665	EPgy2	GGCTCGCC	AGCGGCTCGCCCTT		A	G	C	G	G	C	T	C	G	C	C	C	T	T
2R	+	2R+10375392	FBti0024907	EPgy2	TTGTGGAA	TTTTTGTGGAACAA		T	T	T	T	T	G	T	G	G	A	A	C	A	A
2R	+	2R+10378010	FBti0075936	EPgy2	TATACGCA	CGATATACGCATAT		C	G	A	T	A	T	A	C	G	C	A	T	A	T
2R	+	2R+10494525	FBti0027240	EPgy2	AACTAGGC	ATCAACTAGGCAAA		A	T	C	A	A	C	T	A	G	G	C	A	A	A
2R	+	2R+10505614	FBti0027198	EPgy2	GCCCGTGT	ATGGCCCGTGTCTT		A	T	G	G	C	C	C	G	T	G	T	C	T	T
2R	+	2R+10643629	FBti0027268	EPgy2	GGACACGC	TAAGGACACGCGTT		T	A	A	G	G	A	C	A	C	G	C	G	T	T
2R	+	2R+10656236	FBti0027311	EPgy2	GTACGACC	TAAGTACGACCAAA		T	A	A	G	T	A	C	G	A	C	C	A	A	A
2R	+	2R+10671748	FBti0038939	EPgy2	GTCGGTGG	AGTGTCGGTGGTTC		A	G	T	G	T	C	G	G	T	G	G	T	T	C
2R	+	2R+10742500	FBti0057627	EPgy2	GTCTGACA	AGAGTCTGACACGT		A	G	A	G	T	C	T	G	A	C	A	C	G	T
2R	+	2R+10772373	FBti0027098	EPgy2	CGCCCGCC	CTGCGCCCGCCTCC		C	T	G	C	G	C	C	C	G	C	C	T	C	C
2R	+	2R+10849784	FBti0075459	EPgy2	GTCTAAAA	ATTGTCTAAAAGTG		A	T	T	G	T	C	T	A	A	A	A	G	T	G
2R	+	2R+10871477	FBti0076044	EPgy2	CCCCAAAC	AGTCCCCAAACCCA		A	G	T	C	C	C	C	A	A	A	C	C	C	A
2R	+	2R+11003542	FBti0039284	EPgy2	CGCGGAAC	TGTCGCGGAACGCT		T	G	T	C	G	C	G	G	A	A	C	G	C	T
2R	+	2R+11136262	FBti0039005	EPgy2	GGCTAGCC	GGGGGCTAGCCGAA		G	G	G	G	G	C	T	A	G	C	C	G	A	A
2R	+	2R+11140120	FBti0039844	EPgy2	GTTTGTCT	ATTGTTTGTCTATT		A	T	T	G	T	T	T	G	T	C	T	A	T	T
2R	+	2R+11165187	FBti0025209	EPgy2	ATTTGGCT	CTTATTTGGCTGTT		C	T	T	A	T	T	T	G	G	C	T	G	T	T
2R	+	2R+11268974	FBti0027258	EPgy2	AGCTAAAT	GACAGCTAAATGTT		G	A	C	A	G	C	T	A	A	A	T	G	T	T
2R	+	2R+11399230	FBti0039152	EPgy2	ATCCAGAC	GAGATCCAGACGTG		G	A	G	A	T	C	C	A	G	A	C	G	T	G
2R	+	2R+11567061	FBti0057823	EPgy2	AGTGGGAG	AAGAGTGGGAGATA		A	A	G	A	G	T	G	G	G	A	G	A	T	A
2R	+	2R+11784789	FBti0039325	EPgy2	GGCCAGTC	TTGGGCCAGTCGCT		T	T	G	G	G	C	C	A	G	T	C	G	C	T
2R	+	2R+11895827	FBti0039637	EPgy2	CTCCCGTC	CTGCTCCCGTCGAA		C	T	G	C	T	C	C	C	G	T	C	G	A	A
2R	+	2R+11904580	FBti0100377	EPgy2	TTCTAAAC	TTTTTCTAAACTAA		T	T	T	T	T	C	T	A	A	A	C	T	A	A
2R	+	2R+11905272	FBti0076047	EPgy2	GGTTAGCA	ATAGGTTAGCATAG		A	T	A	G	G	T	T	A	G	C	A	T	A	G
2R	+	2R+12012503	FBti0039907	EPgy2	TTCGCACT	AAATTCGCACTTAT		A	A	A	T	T	C	G	C	A	C	T	T	A	T
2R	+	2R+12023098	FBti0039543	EPgy2	CTTCGGGT	ATACTTCGGGTGAA		A	T	A	C	T	T	C	G	G	G	T	G	A	A
2R	+	2R+12067620	FBti0040212	EPgy2	GTCTGAGT	GGTGTCTGAGTTTC		G	G	T	G	T	C	T	G	A	G	T	T	T	C
2R	+	2R+12083907	FBti0040150	EPgy2	CGTCGGTC	AGGCGTCGGTCAAT		A	G	G	C	G	T	C	G	G	T	C	A	A	T
2R	+	2R+12090412	FBti0100363	EPgy2	ACACAGAC	ACAACACAGACGCT		A	C	A	A	C	A	C	A	G	A	C	G	C	T
2R	+	2R+12097992	FBti0024109	EPgy2	GTTCCGCT	TTGGTTCCGCTCAG		T	T	G	G	T	T	C	C	G	C	T	C	A	G
2R	+	2R+12108399	FBti0024892	EPgy2	CTTTGAAT	TTGCTTTGAATACA		T	T	G	C	T	T	T	G	A	A	T	A	C	A
2R	+	2R+12109227	FBti0033299	EPgy2	CGACAACC	AAACGACAACCGAA		A	A	A	C	G	A	C	A	A	C	C	G	A	A
2R	+	2R+12224163	FBti0027366	EPgy2	GTTTGGCC	TCAGTTTGGCCGCA		T	C	A	G	T	T	T	G	G	C	C	G	C	A
2R	+	2R+12225550	FBti0039341	EPgy2	GGCCCCGC	AAAGGCCCCGCATT		A	A	A	G	G	C	C	C	C	G	C	A	T	T
2R	+	2R+12396600	FBti0038802	EPgy2	GCACAGTG	AAGGCACAGTGCAA		A	A	G	G	C	A	C	A	G	T	G	C	A	A
2R	+	2R+12468345	FBti0039903	EPgy2	GGCGGGAC	GCAGGCGGGACTGT		G	C	A	G	G	C	G	G	G	A	C	T	G	T
2R	+	2R+12495116	FBti0039470	EPgy2	GCGCAGGC	AAAGCGCAGGCGTA		A	A	A	G	C	G	C	A	G	G	C	G	T	A
2R	+	2R+12671110	FBti0027050	EPgy2	GTCTAGAA	GCAGTCTAGAACGT		G	C	A	G	T	C	T	A	G	A	A	C	G	T
2R	+	2R+12672587	FBti0040016	EPgy2	GGCGGAAC	GGAGGCGGAACTAT		G	G	A	G	G	C	G	G	A	A	C	T	A	T
2R	+	2R+12718166	FBti0058040	EPgy2	GCTTCGCC	AATGCTTCGCCTTT		A	A	T	G	C	T	T	C	G	C	C	T	T	T
2R	+	2R+12743727	FBti0039935	EPgy2	GTCTGATG	TAAGTCTGATGTCT		T	A	A	G	T	C	T	G	A	T	G	T	C	T
2R	+	2R+12756906	FBti0027128	EPgy2	GCTGGAAG	ATGGCTGGAAGGAA		A	T	G	G	C	T	G	G	A	A	G	G	A	A
2R	+	2R+12812005	FBti0057761	EPgy2	GATACGCA	TGAGATACGCAAGA		T	G	A	G	A	T	A	C	G	C	A	A	G	A
2R	+	2R+12915164	FBti0039757	EPgy2	GCTCAGTT	ATAGCTCAGTTGTT		A	T	A	G	C	T	C	A	G	T	T	G	T	T
2R	+	2R+12937115	FBti0027401	EPgy2	ACTAGAGT	AGTACTAGAGTACA		A	G	T	A	C	T	A	G	A	G	T	A	C	A
2R	+	2R+12963362	FBti0075885	EPgy2	CGCCGAGG	ATACGCCGAGGTCT		A	T	A	C	G	C	C	G	A	G	G	T	C	T
2R	+	2R+13031565	FBti0076039	EPgy2	GCCAAAAG	AAGGCCAAAAGTAC		A	A	G	G	C	C	A	A	A	A	G	T	A	C
2R	+	2R+13032313	FBti0076115	EPgy2	CACTCGAC	AGACACTCGACTCT		A	G	A	C	A	C	T	C	G	A	C	T	C	T
2R	+	2R+13033296	FBti0057973	EPgy2	GGCGAAGT	CACGGCGAAGTAAT		C	A	C	G	G	C	G	A	A	G	T	A	A	T
2R	+	2R+13152997	FBti0039834	EPgy2	CGGCGAAC	AAACGGCGAACTCC		A	A	A	C	G	G	C	G	A	A	C	T	C	C
2R	+	2R+13366661	FBti0027125	EPgy2	CTCGTGGG	ATGCTCGTGGGTGC		A	T	G	C	T	C	G	T	G	G	G	T	G	C
2R	+	2R+13422859	FBti0039227	EPgy2	GGCTCGCC	GTTGGCTCGCCTTC		G	T	T	G	G	C	T	C	G	C	C	T	T	C
2R	+	2R+13424954	FBti0057907	EPgy2	AACTGAGA	CTCAACTGAGAGTT		C	T	C	A	A	C	T	G	A	G	A	G	T	T
2R	+	2R+13435758	FBti0040051	EPgy2	AAGTGAAC	TCAAAGTGAACTTA		T	C	A	A	A	G	T	G	A	A	C	T	T	A
2R	+	2R+13520943	FBti0039618	EPgy2	GCTCAGCG	ATTGCTCAGCGAGT		A	T	T	G	C	T	C	A	G	C	G	A	G	T
2R	+	2R+13553283	FBti0040213	EPgy2	CGTCCGCC	TCTCGTCCGCCCTT		T	C	T	C	G	T	C	C	G	C	C	C	T	T
2R	+	2R+13566804	FBti0076009	EPgy2	TATCGTAC	TCCTATCGTACCAG		T	C	C	T	A	T	C	G	T	A	C	C	A	G
2R	+	2R+13585875	FBti0027179	EPgy2	ATGATTCA	CTGATGATTCACGT		C	T	G	A	T	G	A	T	T	C	A	C	G	T
2R	+	2R+13614344	FBti0038996	EPgy2	CCACGAGG	AGACCACGAGGCAA		A	G	A	C	C	A	C	G	A	G	G	C	A	A
2R	+	2R+13648437	FBti0040156	EPgy2	GTACGGTT	AGCGTACGGTTCAT		A	G	C	G	T	A	C	G	G	T	T	C	A	T
2R	+	2R+13654534	FBti0027134	EPgy2	GTCTGAAG	TTGGTCTGAAGCAA		T	T	G	G	T	C	T	G	A	A	G	C	A	A
2R	+	2R+13738395	FBti0040022	EPgy2	CTCTGCAG	ATGCTCTGCAGCCA		A	T	G	C	T	C	T	G	C	A	G	C	C	A
2R	+	2R+13753391	FBti0039113	EPgy2	CACTGTGC	AGCCACTGTGCATT		A	G	C	C	A	C	T	G	T	G	C	A	T	T
2R	+	2R+13757263	FBti0033225	EPgy2	GGTGGGCG	ATAGGTGGGCGGTG		A	T	A	G	G	T	G	G	G	C	G	G	T	G
2R	+	2R+13981961	FBti0039220	EPgy2	GCACAGCA	TGCGCACAGCACGA		T	G	C	G	C	A	C	A	G	C	A	C	G	A
2R	+	2R+14015984	FBti0039861	EPgy2	ACCCAGGC	ATAACCCAGGCAGA		A	T	A	A	C	C	C	A	G	G	C	A	G	A
2R	+	2R+14023136	FBti0039888	EPgy2	GTCACAAC	AAAGTCACAACCAC		A	A	A	G	T	C	A	C	A	A	C	C	A	C
2R	+	2R+14028250	FBti0057651	EPgy2	GGTCCGTC	TCTGGTCCGTCCGA		T	C	T	G	G	T	C	C	G	T	C	C	G	A
2R	+	2R+14039202	FBti0039424	EPgy2	ACTCTGCG	ATAACTCTGCGCTC		A	T	A	A	C	T	C	T	G	C	G	C	T	C
2R	+	2R+14192535	FBti0057821	EPgy2	CGGTGGAA	AAGCGGTGGAAGGT		A	A	G	C	G	G	T	G	G	A	A	G	G	T
2R	+	2R+14226933	FBti0039180	EPgy2	GGCCGCTG	ATGGGCCGCTGCAA		A	T	G	G	G	C	C	G	C	T	G	C	A	A
2R	+	2R+14289450	FBti0039770	EPgy2	CGCTAGAC	AAACGCTAGACAGA		A	A	A	C	G	C	T	A	G	A	C	A	G	A
2R	+	2R+14291982	FBti0024068	EPgy2	CCCCAGAT	GAACCCCAGATGCT		G	A	A	C	C	C	C	A	G	A	T	G	C	T
2R	+	2R+14295347	FBti0075884	EPgy2	AGCGGCAC	CACAGCGGCACCTT		C	A	C	A	G	C	G	G	C	A	C	C	T	T
2R	+	2R+14313951	FBti0039412	EPgy2	GGCGAGGT	TGCGGCGAGGTCGT		T	G	C	G	G	C	G	A	G	G	T	C	G	T
2R	+	2R+14367946	FBti0039145	EPgy2	ATCCCGAG	AAAATCCCGAGTGG		A	A	A	A	T	C	C	C	G	A	G	T	G	G
2R	+	2R+14391699	FBti0039938	EPgy2	ATCTGAAT	ATGATCTGAATACT		A	T	G	A	T	C	T	G	A	A	T	A	C	T
2R	+	2R+14519465	FBti0038819	EPgy2	GTTTGAGA	TTCGTTTGAGATAT		T	T	C	G	T	T	T	G	A	G	A	T	A	T
2R	+	2R+14560908	FBti0075437	EPgy2	GTGCCAAT	TAAGTGCCAATATA		T	A	A	G	T	G	C	C	A	A	T	A	T	A
2R	+	2R+14576064	FBti0033339	EPgy2	TCCGATCT	CGGTCCGATCTCTC		C	G	G	T	C	C	G	A	T	C	T	C	T	C
2R	+	2R+14590042	FBti0057897	EPgy2	AGTCGAAC	TTAAGTCGAACAAT		T	T	A	A	G	T	C	G	A	A	C	A	A	T
2R	+	2R+14605579	FBti0057801	EPgy2	GTTTGTTT	CTTGTTTGTTTAGT		C	T	T	G	T	T	T	G	T	T	T	A	G	T
2R	+	2R+14684129	FBti0039316	EPgy2	GCCCCACT	TTGGCCCCACTCGT		T	T	G	G	C	C	C	C	A	C	T	C	G	T
2R	+	2R+14722257	FBti0024843	EPgy2	CTGCCAAA	TTGCTGCCAAATGC		T	T	G	C	T	G	C	C	A	A	A	T	G	C
2R	+	2R+14722743	FBti0039796	EPgy2	GTTCCGTC	TTCGTTCCGTCACT		T	T	C	G	T	T	C	C	G	T	C	A	C	T
2R	+	2R+14738075	FBti0076126	EPgy2	ATTTAGTT	ACTATTTAGTTGCT		A	C	T	A	T	T	T	A	G	T	T	G	C	T
2R	+	2R+14865065	FBti0076083	EPgy2	AGATCAGT	GAGAGATCAGTCGA		G	A	G	A	G	A	T	C	A	G	T	C	G	A
2R	+	2R+15009618	FBti0038980	EPgy2	CTTGGAGT	TTACTTGGAGTCGG		T	T	A	C	T	T	G	G	A	G	T	C	G	G
2R	+	2R+15117305	FBti0039472	EPgy2	CCGCCGCC	TCCCCGCCGCCCTA		T	C	C	C	C	G	C	C	G	C	C	C	T	A
2R	+	2R+15180872	FBti0024102	EPgy2	GCCCATGA	TTAGCCCATGACTT		T	T	A	G	C	C	C	A	T	G	A	C	T	T
2R	+	2R+15260821	FBti0027144	EPgy2	CAAAGCTC	TCGCAAAGCTCCAA		T	C	G	C	A	A	A	G	C	T	C	C	A	A
2R	+	2R+15344266	FBti0039941	EPgy2	CGATGAGA	ATGCGATGAGACCC		A	T	G	C	G	A	T	G	A	G	A	C	C	C
2R	+	2R+15504039	FBti0038873	EPgy2	AACCACAT	TATAACCACATGGT		T	A	T	A	A	C	C	A	C	A	T	G	G	T
2R	+	2R+15916055	FBti0038977	EPgy2	GGTGTGCC	TGTGGTGTGCCTTT		T	G	T	G	G	T	G	T	G	C	C	T	T	T
2R	+	2R+16145318	FBti0075855	EPgy2	GAGTGGAG	ATCGAGTGGAGGCG		A	T	C	G	A	G	T	G	G	A	G	G	C	G
2R	+	2R+16206710	FBti0039798	EPgy2	CTGGCGGC	ATGCTGGCGGCATT		A	T	G	C	T	G	G	C	G	G	C	A	T	T
2R	+	2R+16214261	FBti0076013	EPgy2	GCCTGCAC	TTGGCCTGCACCAT		T	T	G	G	C	C	T	G	C	A	C	C	A	T
2R	+	2R+16215477	FBti0027031	EPgy2	GGGCGACT	AATGGGCGACTGTT		A	A	T	G	G	G	C	G	A	C	T	G	T	T
2R	+	2R+16463149	FBti0025146	EPgy2	GGGCGTGA	CCTGGGCGTGAGTG		C	C	T	G	G	G	C	G	T	G	A	G	T	G
2R	+	2R+16476035	FBti0039802	EPgy2	CTTCAGAC	AAACTTCAGACAGT		A	A	A	C	T	T	C	A	G	A	C	A	G	T
2R	+	2R+16558997	FBti0025197	EPgy2	GTCCAGAT	TGTGTCCAGATGAA		T	G	T	G	T	C	C	A	G	A	T	G	A	A
2R	+	2R+16758286	FBti0039201	EPgy2	GGCATGGC	AAGGGCATGGCAAT		A	A	G	G	G	C	A	T	G	G	C	A	A	T
2R	+	2R+16963517	FBti0058035	EPgy2	GGGCGGAC	ACCGGGCGGACTAT		A	C	C	G	G	G	C	G	G	A	C	T	A	T
2R	+	2R+16970338	FBti0039391	EPgy2	TCGCAGGC	ACGTCGCAGGCCAG		A	C	G	T	C	G	C	A	G	G	C	C	A	G
2R	+	2R+17047933	FBti0040058	EPgy2	ATGCTGCC	ATAATGCTGCCTCT		A	T	A	A	T	G	C	T	G	C	C	T	C	T
2R	+	2R+17062676	FBti0039286	EPgy2	CCTGGCAC	ATACCTGGCACACT		A	T	A	C	C	T	G	G	C	A	C	A	C	T
2R	+	2R+17087966	FBti0039731	EPgy2	GTTTGAAA	TCAGTTTGAAACTT		T	C	A	G	T	T	T	G	A	A	A	C	T	T
2R	+	2R+17200139	FBti0057728	EPgy2	AGCTGAAC	ATCAGCTGAACCGC		A	T	C	A	G	C	T	G	A	A	C	C	G	C
2R	+	2R+17362939	FBti0024060	EPgy2	GTCTGGGA	AGAGTCTGGGAGTC		A	G	A	G	T	C	T	G	G	G	A	G	T	C
2R	+	2R+17368327	FBti0039420	EPgy2	GGCCGGTC	TTTGGCCGGTCGGT		T	T	T	G	G	C	C	G	G	T	C	G	G	T
2R	+	2R+17389631	FBti0039854	EPgy2	GGAGAGAC	ATTGGAGAGACGCA		A	T	T	G	G	A	G	A	G	A	C	G	C	A
2R	+	2R+17409788	FBti0058007	EPgy2	GGGCGGAA	ATGGGGCGGAAGAA		A	T	G	G	G	G	C	G	G	A	A	G	A	A
2R	+	2R+17409888	FBti0025210	EPgy2	GACTGATC	ATGGACTGATCCTT		A	T	G	G	A	C	T	G	A	T	C	C	T	T
2R	+	2R+17521628	FBti0039012	EPgy2	ACGCCAGC	ACAACGCCAGCCAA		A	C	A	A	C	G	C	C	A	G	C	C	A	A
2R	+	2R+17549484	FBti0024872	EPgy2	GTTCAGCT	ATAGTTCAGCTCTT		A	T	A	G	T	T	C	A	G	C	T	C	T	T
2R	+	2R+17601548	FBti0039694	EPgy2	GGTGGCGT	ATCGGTGGCGTCTT		A	T	C	G	G	T	G	G	C	G	T	C	T	T
2R	+	2R+17948588	FBti0038826	EPgy2	AGCCGCAC	AGCAGCCGCACTTT		A	G	C	A	G	C	C	G	C	A	C	T	T	T
2R	+	2R+17962638	FBti0057780	EPgy2	GCCCACAC	TTCGCCCACACAAA		T	T	C	G	C	C	C	A	C	A	C	A	A	A
2R	+	2R+17990423	FBti0075893	EPgy2	TTTCAGCT	TTGTTTCAGCTGTT		T	T	G	T	T	T	C	A	G	C	T	G	T	T
2R	+	2R+18073575	FBti0057888	EPgy2	GATAAAAA	TACGATAAAAACGA		T	A	C	G	A	T	A	A	A	A	A	C	G	A
2R	+	2R+18100355	FBti0039995	EPgy2	ATTGCAAG	AGAATTGCAAGTAA		A	G	A	A	T	T	G	C	A	A	G	T	A	A
2R	+	2R+18158277	FBti0039020	EPgy2	CTCCAGCT	ACGCTCCAGCTTTT		A	C	G	C	T	C	C	A	G	C	T	T	T	T
2R	+	2R+18291236	FBti0033369	EPgy2	GGTCCGAG	TCGGGTCCGAGCAA		T	C	G	G	G	T	C	C	G	A	G	C	A	A
2R	+	2R+18314512	FBti0057874	EPgy2	CACCCATC	ATACACCCATCCTT		A	T	A	C	A	C	C	C	A	T	C	C	T	T
2R	+	2R+18446309	FBti0039628	EPgy2	CGCCGACT	ATGCGCCGACTTGT		A	T	G	C	G	C	C	G	A	C	T	T	G	T
2R	+	2R+18449366	FBti0039155	EPgy2	GACATAAT	AGTGACATAATGAA		A	G	T	G	A	C	A	T	A	A	T	G	A	A
2R	+	2R+18535564	FBti0040154	EPgy2	GGTGGGTC	ATTGGTGGGTCTCT		A	T	T	G	G	T	G	G	G	T	C	T	C	T
2R	+	2R+18546103	FBti0100342	EPgy2	TCTGAGAC	AGATCTGAGACCTT		A	G	A	T	C	T	G	A	G	A	C	C	T	T
2R	+	2R+18568606	FBti0076072	EPgy2	GTACTAGA	ATAGTACTAGATTT		A	T	A	G	T	A	C	T	A	G	A	T	T	T
2R	+	2R+18686605	FBti0039881	EPgy2	GCTTGGGT	ATTGCTTGGGTAAT		A	T	T	G	C	T	T	G	G	G	T	A	A	T
2R	+	2R+18720676	FBti0040046	EPgy2	AACTGAAC	ATAAACTGAACGAT		A	T	A	A	A	C	T	G	A	A	C	G	A	T
2R	+	2R+18720706	FBti0039367	EPgy2	GTACATTG	TTAGTACATTGCAT		T	T	A	G	T	A	C	A	T	T	G	C	A	T
2R	+	2R+18821806	FBti0038856	EPgy2	GGATAAGG	ACGGGATAAGGCGA		A	C	G	G	G	A	T	A	A	G	G	C	G	A
2R	+	2R+18890266	FBti0038848	EPgy2	AACGTGAC	CACAACGTGACCAT		C	A	C	A	A	C	G	T	G	A	C	C	A	T
2R	+	2R+19216668	FBti0040127	EPgy2	GCCCCATC	ATAGCCCCATCTAT		A	T	A	G	C	C	C	C	A	T	C	T	A	T
2R	+	2R+19244844	FBti0024126	EPgy2	TTGTTACG	ACTTTGTTACGGGA		A	C	T	T	T	G	T	T	A	C	G	G	G	A
2R	+	2R+19264603	FBti0027283	EPgy2	TCCGTTGC	CACTCCGTTGCATG		C	A	C	T	C	C	G	T	T	G	C	A	T	G
2R	+	2R+19273441	FBti0027284	EPgy2	GCGCGACG	CTTGCGCGACGTTT		C	T	T	G	C	G	C	G	A	C	G	T	T	T
2R	+	2R+19316005	FBti0027255	EPgy2	CACCAAAC	ATGCACCAAACAGT		A	T	G	C	A	C	C	A	A	A	C	A	G	T
2R	+	2R+19393763	FBti0057596	EPgy2	TTCGCGAT	TTGTTCGCGATTAG		T	T	G	T	T	C	G	C	G	A	T	T	A	G
2R	+	2R+19411391	FBti0027072	EPgy2	ATACGTAG	ATCATACGTAGCAG		A	T	C	A	T	A	C	G	T	A	G	C	A	G
2R	+	2R+19431557	FBti0057913	EPgy2	AGCCGAAG	AGTAGCCGAAGTAC		A	G	T	A	G	C	C	G	A	A	G	T	A	C
2R	+	2R+19435787	FBti0024913	EPgy2	GAGCCGAC	GACGAGCCGACGCG		G	A	C	G	A	G	C	C	G	A	C	G	C	G
2R	+	2R+19554515	FBti0040163	EPgy2	GGCCGACT	TTGGGCCGACTTGT		T	T	G	G	G	C	C	G	A	C	T	T	G	T
2R	+	2R+19594620	FBti0025226	EPgy2	GTAGCTGC	TTTGTAGCTGCCAT		T	T	T	G	T	A	G	C	T	G	C	C	A	T
2R	+	2R+19727720	FBti0038829	EPgy2	TGCTCGAC	CGCTGCTCGACCGA		C	G	C	T	G	C	T	C	G	A	C	C	G	A
2R	+	2R+19738603	FBti0039809	EPgy2	GCATAAAC	AAAGCATAAACTTT		A	A	A	G	C	A	T	A	A	A	C	T	T	T
2R	+	2R+19785762	FBti0039330	EPgy2	TCTATATT	GGATCTATATTTTC		G	G	A	T	C	T	A	T	A	T	T	T	T	C
2R	+	2R+19844918	FBti0033255	EPgy2	CTCTGAGT	ACGCTCTGAGTTGT		A	C	G	C	T	C	T	G	A	G	T	T	G	T
2R	+	2R+19857883	FBti0039114	EPgy2	CACTTGGG	TTCCACTTGGGGGA		T	T	C	C	A	C	T	T	G	G	G	G	G	A
2R	+	2R+19859979	FBti0039853	EPgy2	GGCTGGAG	TGCGGCTGGAGGCT		T	G	C	G	G	C	T	G	G	A	G	G	C	T
2R	+	2R+19882575	FBti0033284	EPgy2	GTTCTAGG	CAGGTTCTAGGATT		C	A	G	G	T	T	C	T	A	G	G	A	T	T
2R	+	2R+19934909	FBti0100381	EPgy2	CACATAGT	TCACACATAGTAAA		T	C	A	C	A	C	A	T	A	G	T	A	A	A
2R	+	2R+19944698	FBti0057966	EPgy2	GTCCCAGC	TGAGTCCCAGCGCT		T	G	A	G	T	C	C	C	A	G	C	G	C	T
2R	+	2R+19974327	FBti0033239	EPgy2	CGCTCGAT	ACTCGCTCGATCAA		A	C	T	C	G	C	T	C	G	A	T	C	A	A
2R	+	2R+20046889	FBti0040204	EPgy2	GTTCAAAC	TACGTTCAAACCAT		T	A	C	G	T	T	C	A	A	A	C	C	A	T
2R	+	2R+20050050	FBti0075999	EPgy2	TTACAGAC	TGATTACAGACCAA		T	G	A	T	T	A	C	A	G	A	C	C	A	A
2R	+	2R+20074253	FBti0100355	EPgy2	GTCTGGAC	TTCGTCTGGACACG		T	T	C	G	T	C	T	G	G	A	C	A	C	G
2R	+	2R+20075044	FBti0039752	EPgy2	TGCCAAAC	TAGTGCCAAACCAA		T	A	G	T	G	C	C	A	A	A	C	C	A	A
2R	+	2R+20193288	FBti0039349	EPgy2	CCACAGAC	AGCCCACAGACGGT		A	G	C	C	C	A	C	A	G	A	C	G	G	T
2R	+	2R+20193394	FBti0076037	EPgy2	CTTGCGAC	TAACTTGCGACCAA		T	A	A	C	T	T	G	C	G	A	C	C	A	A
2R	+	2R+20419510	FBti0039336	EPgy2	TGACCTGG	GTATGACCTGGCTA		G	T	A	T	G	A	C	C	T	G	G	C	T	A
2R	+	2R+20449171	FBti0077798	EPgy2	ACCCAGAA	CTAACCCAGAAGAA		C	T	A	A	C	C	C	A	G	A	A	G	A	A
2R	+	2R+20459320	FBti0076073	EPgy2	GTGGCATC	ATGGTGGCATCCAA		A	T	G	G	T	G	G	C	A	T	C	C	A	A
2R	+	2R+20489346	FBti0038768	EPgy2	GCAGAGAG	TCTGCAGAGAGTGT		T	C	T	G	C	A	G	A	G	A	G	T	G	T
2R	+	2R+20491148	FBti0027032	EPgy2	TCTTCTCT	ATTTCTTCTCTGCC		A	T	T	T	C	T	T	C	T	C	T	G	C	C
2R	+	2R+20555893	FBti0025126	EPgy2	CATTTTGT	ACACATTTTGTTGA		A	C	A	C	A	T	T	T	T	G	T	T	G	A
2R	+	2R+20791426	FBti0024061	EPgy2	CACTGACG	ACACACTGACGTGT		A	C	A	C	A	C	T	G	A	C	G	T	G	T
2R	+	2R+20825905	FBti0039291	EPgy2	CGGGACAC	AATCGGGACACCTT		A	A	T	C	G	G	G	A	C	A	C	C	T	T
2R	+	2R+20924197	FBti0040183	EPgy2	TACTGTCC	CACTACTGTCCTAT		C	A	C	T	A	C	T	G	T	C	C	T	A	T
2R	+	2R+21113948	FBti0040231	EPgy2	CTCTGAGC	TATCTCTGAGCGTT		T	A	T	C	T	C	T	G	A	G	C	G	T	T
3L	+	3L+71581	FBti0027323	EPgy2	AAATGAAC	AGGAAATGAACCAT		A	G	G	A	A	A	T	G	A	A	C	C	A	T
3L	+	3L+120422	FBti0057884	EPgy2	GCACATAG	TTAGCACATAGTAA		T	T	A	G	C	A	C	A	T	A	G	T	A	A
3L	+	3L+129384	FBti0039702	EPgy2	GTTCAAAG	AAGGTTCAAAGCAA		A	A	G	G	T	T	C	A	A	A	G	C	A	A
3L	+	3L+160649	FBti0025203	EPgy2	CTCCAAAG	AAGCTCCAAAGCTG		A	A	G	C	T	C	C	A	A	A	G	C	T	G
3L	+	3L+184620	FBti0039224	EPgy2	AGTGAGAC	CTCAGTGAGACCTT		C	T	C	A	G	T	G	A	G	A	C	C	T	T
3L	+	3L+200255	FBti0038073	EPgy2	CAAAAGGC	CGCCAAAAGGCACG		C	G	C	C	A	A	A	A	G	G	C	A	C	G
3L	+	3L+211102	FBti0057629	EPgy2	GCTCGAGT	TAAGCTCGAGTGAT		T	A	A	G	C	T	C	G	A	G	T	G	A	T
3L	+	3L+265070	FBti0039812	EPgy2	TCCCCGTT	TGCTCCCCGTTCGT		T	G	C	T	C	C	C	C	G	T	T	C	G	T
3L	+	3L+332454	FBti0057963	EPgy2	GCGTCGAG	CCTGCGTCGAGCTC		C	C	T	G	C	G	T	C	G	A	G	C	T	C
3L	+	3L+341583	FBti0057870	EPgy2	GACGGAGA	ATAGACGGAGAGAC		A	T	A	G	A	C	G	G	A	G	A	G	A	C
3L	+	3L+341643	FBti0040153	EPgy2	AGTTCCGC	GATAGTTCCGCCTG		G	A	T	A	G	T	T	C	C	G	C	C	T	G
3L	+	3L+346845	FBti0076152	EPgy2	GGCTAGCC	ACAGGCTAGCCACT		A	C	A	G	G	C	T	A	G	C	C	A	C	T
3L	+	3L+458016	FBti0039526	EPgy2	GAGTGGAG	TTGGAGTGGAGTGG		T	T	G	G	A	G	T	G	G	A	G	T	G	G
3L	+	3L+460251	FBti0040076	EPgy2	CTTTGACC	GCACTTTGACCATA		G	C	A	C	T	T	T	G	A	C	C	A	T	A
3L	+	3L+465579	FBti0027084	EPgy2	GACTGCAC	ACTGACTGCACCAC		A	C	T	G	A	C	T	G	C	A	C	C	A	C
3L	+	3L+540628	FBti0040195	EPgy2	TTTCAGCC	ATCTTTCAGCCCAT		A	T	C	T	T	T	C	A	G	C	C	C	A	T
3L	+	3L+543107	FBti0057795	EPgy2	ATCGAAGC	TTAATCGAAGCGGT		T	T	A	A	T	C	G	A	A	G	C	G	G	T
3L	+	3L+634451	FBti0039307	EPgy2	GACTAGAA	GTGGACTAGAACCA		G	T	G	G	A	C	T	A	G	A	A	C	C	A
3L	+	3L+637598	FBti0039574	EPgy2	ATCGAGGT	AACATCGAGGTATG		A	A	C	A	T	C	G	A	G	G	T	A	T	G
3L	+	3L+679716	FBti0057880	EPgy2	AGTTGAAC	ACCAGTTGAACCGA		A	C	C	A	G	T	T	G	A	A	C	C	G	A
3L	+	3L+682183	FBti0039340	EPgy2	CTGGGAAC	CTGCTGGGAACCTG		C	T	G	C	T	G	G	G	A	A	C	C	T	G
3L	+	3L+685238	FBti0027107	EPgy2	GTTGCGGT	GAAGTTGCGGTAAA		G	A	A	G	T	T	G	C	G	G	T	A	A	A
3L	+	3L+699171	FBti0039478	EPgy2	GTTCTCCC	AACGTTCTCCCTCT		A	A	C	G	T	T	C	T	C	C	C	T	C	T
3L	+	3L+711821	FBti0027187	EPgy2	GATCAGTG	AGCGATCAGTGATA		A	G	C	G	A	T	C	A	G	T	G	A	T	A
3L	+	3L+717065	FBti0027186	EPgy2	CAGCATCC	ATGCAGCATCCCAA		A	T	G	C	A	G	C	A	T	C	C	C	A	A
3L	+	3L+749363	FBti0040027	EPgy2	GGCCGTAC	TCTGGCCGTACTTT		T	C	T	G	G	C	C	G	T	A	C	T	T	T
3L	+	3L+816754	FBti0033338	EPgy2	GAGTAGCC	ATAGAGTAGCCCAC		A	T	A	G	A	G	T	A	G	C	C	C	A	C
3L	+	3L+837900	FBti0075942	EPgy2	CGTCAGAC	ACGCGTCAGACGTT		A	C	G	C	G	T	C	A	G	A	C	G	T	T
3L	+	3L+871974	FBti0033183	EPgy2	GCACGGAG	ACGGCACGGAGCAC		A	C	G	G	C	A	C	G	G	A	G	C	A	C
3L	+	3L+1034617	FBti0039784	EPgy2	AGCGGCGC	AGCAGCGGCGCTTT		A	G	C	A	G	C	G	G	C	G	C	T	T	T
3L	+	3L+1248049	FBti0039663	EPgy2	GTTCAAAT	ATTGTTCAAATAGA		A	T	T	G	T	T	C	A	A	A	T	A	G	A
3L	+	3L+1298653	FBti0025168	EPgy2	GGTGAGAT	CTGGGTGAGATATG		C	T	G	G	G	T	G	A	G	A	T	A	T	G
3L	+	3L+1303093	FBti0040134	EPgy2	GGCTGCGG	ACAGGCTGCGGTGC		A	C	A	G	G	C	T	G	C	G	G	T	G	C
3L	+	3L+1318454	FBti0027201	EPgy2	AGTCACGG	AAAAGTCACGGGAA		A	A	A	A	G	T	C	A	C	G	G	G	A	A
3L	+	3L+1331742	FBti0100379	EPgy2	CTCGACTT	TTCCTCGACTTTGC		T	T	C	C	T	C	G	A	C	T	T	T	G	C
3L	+	3L+1334905	FBti0076123	EPgy2	GTTTAGAT	ATTGTTTAGATCCG		A	T	T	G	T	T	T	A	G	A	T	C	C	G
3L	+	3L+1336374	FBti0039535	EPgy2	GGGCAGCA	TTGGGGCAGCAGCT		T	T	G	G	G	G	C	A	G	C	A	G	C	T
3L	+	3L+1478067	FBti0025299	EPgy2	ATGAAGAG	AAGATGAAGAGGAA		A	A	G	A	T	G	A	A	G	A	G	G	A	A
3L	+	3L+1479126	FBti0033384	EPgy2	GTCTGTGA	TTCGTCTGTGAGAC		T	T	C	G	T	C	T	G	T	G	A	G	A	C
3L	+	3L+1517647	FBti0027228	EPgy2	GTACACTC	ACCGTACACTCTAT		A	C	C	G	T	A	C	A	C	T	C	T	A	T
3L	+	3L+1537259	FBti0025301	EPgy2	CGACACCG	CGGCGACACCGACA		C	G	G	C	G	A	C	A	C	C	G	A	C	A
3L	+	3L+1546105	FBti0024086	EPgy2	GCAGACAC	AATGCAGACACACA		A	A	T	G	C	A	G	A	C	A	C	A	C	A
3L	+	3L+1558448	FBti0076151	EPgy2	GTTCCAGG	CAGGTTCCAGGTCT		C	A	G	G	T	T	C	C	A	G	G	T	C	T
3L	+	3L+1569218	FBti0038890	EPgy2	CACCGAAT	AAACACCGAATACT		A	A	A	C	A	C	C	G	A	A	T	A	C	T
3L	+	3L+1618389	FBti0040176	EPgy2	CGCCTGGC	TTCCGCCTGGCATA		T	T	C	C	G	C	C	T	G	G	C	A	T	A
3L	+	3L+1642636	FBti0038886	EPgy2	ACCGCATC	CGCACCGCATCCAT		C	G	C	A	C	C	G	C	A	T	C	C	A	T
3L	+	3L+1738595	FBti0025195	EPgy2	GGTACAAC	GCAGGTACAACCAA		G	C	A	G	G	T	A	C	A	A	C	C	A	A
3L	+	3L+1865054	FBti0038931	EPgy2	GTCCAATG	AGTGTCCAATGCTT		A	G	T	G	T	C	C	A	A	T	G	C	T	T
3L	+	3L+1876394	FBti0027088	EPgy2	GGCTGGCA	TAGGGCTGGCAAAT		T	A	G	G	G	C	T	G	G	C	A	A	A	T
3L	+	3L+1967752	FBti0057953	EPgy2	CGCTCGCT	TAACGCTCGCTGCT		T	A	A	C	G	C	T	C	G	C	T	G	C	T
3L	+	3L+2256995	FBti0038859	EPgy2	GTAGACAG	TAGGTAGACAGCAT		T	A	G	G	T	A	G	A	C	A	G	C	A	T
3L	+	3L+2262976	FBti0039321	EPgy2	AGCGGAGA	AGGAGCGGAGAGTT		A	G	G	A	G	C	G	G	A	G	A	G	T	T
3L	+	3L+2322756	FBti0039126	EPgy2	ATTTCACT	TTGATTTCACTCGT		T	T	G	A	T	T	T	C	A	C	T	C	G	T
3L	+	3L+2371937	FBti0057613	EPgy2	TCTGGCAT	AACTCTGGCATATT		A	A	C	T	C	T	G	G	C	A	T	A	T	T
3L	+	3L+2377533	FBti0057955	EPgy2	CACTGGAG	ATGCACTGGAGGTT		A	T	G	C	A	C	T	G	G	A	G	G	T	T
3L	+	3L+2589434	FBti0027305	EPgy2	GTATGGTG	AGGGTATGGTGCGC		A	G	G	G	T	A	T	G	G	T	G	C	G	C
3L	+	3L+2591285	FBti0039913	EPgy2	AAGCCACC	ATGAAGCCACCTCT		A	T	G	A	A	G	C	C	A	C	C	T	C	T
3L	+	3L+2599601	FBti0040097	EPgy2	ATAGCAAT	TGCATAGCAATGTT		T	G	C	A	T	A	G	C	A	A	T	G	T	T
3L	+	3L+2636282	FBti0027348	EPgy2	AGTCACAC	AACAGTCACACCAA		A	A	C	A	G	T	C	A	C	A	C	C	A	A
3L	+	3L+2879176	FBti0039009	EPgy2	GTCGGCAC	CTGGTCGGCACCAA		C	T	G	G	T	C	G	G	C	A	C	C	A	A
3L	+	3L+3038204	FBti0039346	EPgy2	ATCAGAGC	ATCATCAGAGCTCA		A	T	C	A	T	C	A	G	A	G	C	T	C	A
3L	+	3L+3046809	FBti0027064	EPgy2	GTCCAGTT	AGCGTCCAGTTAAT		A	G	C	G	T	C	C	A	G	T	T	A	A	T
3L	+	3L+3077864	FBti0040282	EPgy2	GTCCGATG	AACGTCCGATGCCA		A	A	C	G	T	C	C	G	A	T	G	C	C	A
3L	+	3L+3090629	FBti0039128	EPgy2	AATTGGAC	TTGAATTGGACCCC		T	T	G	A	A	T	T	G	G	A	C	C	C	C
3L	+	3L+3148915	FBti0038772	EPgy2	GTTCTGAG	AGGGTTCTGAGGAT		A	G	G	G	T	T	C	T	G	A	G	G	A	T
3L	+	3L+3196795	FBti0039840	EPgy2	GCTGAAGT	CGGGCTGAAGTCTT		C	G	G	G	C	T	G	A	A	G	T	C	T	T
3L	+	3L+3220873	FBti0024117	EPgy2	GTCCAAGT	TCAGTCCAAGTCCA		T	C	A	G	T	C	C	A	A	G	T	C	C	A
3L	+	3L+3247366	FBti0057936	EPgy2	GGTGTGGT	TTGGGTGTGGTGTT		T	T	G	G	G	T	G	T	G	G	T	G	T	T
3L	+	3L+3319550	FBti0027140	EPgy2	TCGAGCTG	CAGTCGAGCTGGCG		C	A	G	T	C	G	A	G	C	T	G	G	C	G
3L	+	3L+3336858	FBti0027052	EPgy2	GGGCAGTT	ATGGGGCAGTTGCA		A	T	G	G	G	G	C	A	G	T	T	G	C	A
3L	+	3L+3341709	FBti0075837	EPgy2	GTTTCGTG	TCAGTTTCGTGCAA		T	C	A	G	T	T	T	C	G	T	G	C	A	A
3L	+	3L+3376822	FBti0076138	EPgy2	CGCTCATT	TTACGCTCATTGAA		T	T	A	C	G	C	T	C	A	T	T	G	A	A
3L	+	3L+3425025	FBti0039488	EPgy2	GTTTGAGG	TTAGTTTGAGGCAC		T	T	A	G	T	T	T	G	A	G	G	C	A	C
3L	+	3L+3460603	FBti0027271	EPgy2	GGCCAAAC	AAAGGCCAAACAGT		A	A	A	G	G	C	C	A	A	A	C	A	G	T
3L	+	3L+3593853	FBti0057810	EPgy2	GCTTGTGA	TGGGCTTGTGAGTG		T	G	G	G	C	T	T	G	T	G	A	G	T	G
3L	+	3L+3593858	FBti0040218	EPgy2	ATCGGGAA	GGCATCGGGAACAG		G	G	C	A	T	C	G	G	G	A	A	C	A	G
3L	+	3L+3806711	FBti0040201	EPgy2	CACAAGAC	GCACACAAGACGAA		G	C	A	C	A	C	A	A	G	A	C	G	A	A
3L	+	3L+3892932	FBti0057679	EPgy2	GCATAAAC	ATAGCATAAACACT		A	T	A	G	C	A	T	A	A	A	C	A	C	T
3L	+	3L+3903508	FBti0039838	EPgy2	GTCGCGAC	GTAGTCGCGACGGA		G	T	A	G	T	C	G	C	G	A	C	G	G	A
3L	+	3L+3964004	FBti0057646	EPgy2	CTCTCGTG	TTACTCTCGTGTAA		T	T	A	C	T	C	T	C	G	T	G	T	A	A
3L	+	3L+4108844	FBti0100348	EPgy2	TCTGGACA	ATCTCTGGACAATT		A	T	C	T	C	T	G	G	A	C	A	A	T	T
3L	+	3L+4136068	FBti0100375	EPgy2	GTCCAACC	TTCGTCCAACCTAG		T	T	C	G	T	C	C	A	A	C	C	T	A	G
3L	+	3L+4188491	FBti0039011	EPgy2	GTATGGCC	AATGTATGGCCGTT		A	A	T	G	T	A	T	G	G	C	C	G	T	T
3L	+	3L+4252202	FBti0040081	EPgy2	CTGGGCGG	ATGCTGGGCGGAAA		A	T	G	C	T	G	G	G	C	G	G	A	A	A
3L	+	3L+4263613	FBti0075886	EPgy2	CTATGAGG	TTACTATGAGGTAT		T	T	A	C	T	A	T	G	A	G	G	T	A	T
3L	+	3L+4364110	FBti0039978	EPgy2	GTTGTGAC	AAAGTTGTGACCAT		A	A	A	G	T	T	G	T	G	A	C	C	A	T
3L	+	3L+4384449	FBti0038749	EPgy2	TCTCGACC	TCATCTCGACCCTT		T	C	A	T	C	T	C	G	A	C	C	C	T	T
3L	+	3L+4541689	FBti0039817	EPgy2	GCCTGAGC	GGAGCCTGAGCCAG		G	G	A	G	C	C	T	G	A	G	C	C	A	G
3L	+	3L+4544800	FBti0057811	EPgy2	GGTTGGCC	TGGGGTTGGCCTTT		T	G	G	G	G	T	T	G	G	C	C	T	T	T
3L	+	3L+4669583	FBti0039010	EPgy2	GTCCGCGC	AAAGTCCGCGCAGT		A	A	A	G	T	C	C	G	C	G	C	A	G	T
3L	+	3L+5127351	FBti0038777	EPgy2	CTCCACGG	GATCTCCACGGCAA		G	A	T	C	T	C	C	A	C	G	G	C	A	A
3L	+	3L+5344632	FBti0027197	EPgy2	GGATTGGG	TTGGGATTGGGATT		T	T	G	G	G	A	T	T	G	G	G	A	T	T
3L	+	3L+5417078	FBti0025177	EPgy2	GGCCCCAC	AAAGGCCCCACAAT		A	A	A	G	G	C	C	C	C	A	C	A	A	T
3L	+	3L+5577065	FBti0038707	EPgy2	CTCACAAG	GTTCTCACAAGTAT		G	T	T	C	T	C	A	C	A	A	G	T	A	T
3L	+	3L+5746110	FBti0040261	EPgy2	GTCTAAAT	AGCGTCTAAATAAG		A	G	C	G	T	C	T	A	A	A	T	A	A	G
3L	+	3L+5849930	FBti0039139	EPgy2	GTCTCAGT	ATAGTCTCAGTCGT		A	T	A	G	T	C	T	C	A	G	T	C	G	T
3L	+	3L+5919852	FBti0025174	EPgy2	GGCACAAC	AAGGGCACAACAAA		A	A	G	G	G	C	A	C	A	A	C	A	A	A
3L	+	3L+6075901	FBti0075980	EPgy2	CACAGAAC	TTACACAGAACGCT		T	T	A	C	A	C	A	G	A	A	C	G	C	T
3L	+	3L+6088099	FBti0039131	EPgy2	ATGGATTT	CTGATGGATTTGAA		C	T	G	A	T	G	G	A	T	T	T	G	A	A
3L	+	3L+6543808	FBti0039945	EPgy2	GGACAGAC	TACGGACAGACGAT		T	A	C	G	G	A	C	A	G	A	C	G	A	T
3L	+	3L+6799172	FBti0038831	EPgy2	CCTTGACC	AGACCTTGACCACT		A	G	A	C	C	T	T	G	A	C	C	A	C	T
3L	+	3L+6970284	FBti0027272	EPgy2	CCCCAGCT	GTCCCCCAGCTGAG		G	T	C	C	C	C	C	A	G	C	T	G	A	G
3L	+	3L+7127645	FBti0039940	EPgy2	AAGTAGCG	AGGAAGTAGCGAAT		A	G	G	A	A	G	T	A	G	C	G	A	A	T
3L	+	3L+7332080	FBti0025129	EPgy2	GCACCTGT	AGTGCACCTGTCTG		A	G	T	G	C	A	C	C	T	G	T	C	T	G
3L	+	3L+7332594	FBti0076113	EPgy2	ATACAATC	ATTATACAATCTAT		A	T	T	A	T	A	C	A	A	T	C	T	A	T
3L	+	3L+7341426	FBti0039513	EPgy2	TTCTGAAC	TTCTTCTGAACTCA		T	T	C	T	T	C	T	G	A	A	C	T	C	A
3L	+	3L+7364656	FBti0039751	EPgy2	GTCTGTAT	ATCGTCTGTATGCA		A	T	C	G	T	C	T	G	T	A	T	G	C	A
3L	+	3L+7374573	FBti0039295	EPgy2	GTGGGGCC	ACTGTGGGGCCTCT		A	C	T	G	T	G	G	G	G	C	C	T	C	T
3L	+	3L+7521872	FBti0039776	EPgy2	GATTGACC	TTAGATTGACCCAT		T	T	A	G	A	T	T	G	A	C	C	C	A	T
3L	+	3L+7643456	FBti0024110	EPgy2	TAGTAGGG	ATATAGTAGGGTAT		A	T	A	T	A	G	T	A	G	G	G	T	A	T
3L	+	3L+7712292	FBti0075944	EPgy2	GCATGGGC	TTGGCATGGGCCAC		T	T	G	G	C	A	T	G	G	G	C	C	A	C
3L	+	3L+7862128	FBti0040038	EPgy2	GGGCCATA	ATGGGGCCATAAAT		A	T	G	G	G	G	C	C	A	T	A	A	A	T
3L	+	3L+7928756	FBti0027129	EPgy2	GGCCAAAC	AATGGCCAAACAAT		A	A	T	G	G	C	C	A	A	A	C	A	A	T
3L	+	3L+7972144	FBti0039823	EPgy2	GTTATAAT	ATCGTTATAATCCA		A	T	C	G	T	T	A	T	A	A	T	C	C	A
3L	+	3L+8072778	FBti0057743	EPgy2	GACGTGAC	ACGGACGTGACGTT		A	C	G	G	A	C	G	T	G	A	C	G	T	T
3L	+	3L+8121187	FBti0039534	EPgy2	GGCAAACG	ATGGGCAAACGGAA		A	T	G	G	G	C	A	A	A	C	G	G	A	A
3L	+	3L+8174045	FBti0024835	EPgy2	ACTGAGTT	ACTACTGAGTTGTT		A	C	T	A	C	T	G	A	G	T	T	G	T	T
3L	+	3L+8301992	FBti0039147	EPgy2	CCCAACAC	CATCCCAACACACA		C	A	T	C	C	C	A	A	C	A	C	A	C	A
3L	+	3L+8354082	FBti0039631	EPgy2	AGTTCGGC	GCTAGTTCGGCATA		G	C	T	A	G	T	T	C	G	G	C	A	T	A
3L	+	3L+8418109	FBti0057642	EPgy2	GTCTGGCA	ATGGTCTGGCAACG		A	T	G	G	T	C	T	G	G	C	A	A	C	G
3L	+	3L+8451016	FBti0057771	EPgy2	GTGCCCAC	AAAGTGCCCACCAA		A	A	A	G	T	G	C	C	C	A	C	C	A	A
3L	+	3L+8512036	FBti0039356	EPgy2	GGCCAAGT	TGTGGCCAAGTACT		T	G	T	G	G	C	C	A	A	G	T	A	C	T
3L	+	3L+8528092	FBti0039612	EPgy2	TACAGGCG	TTTTACAGGCGGAG		T	T	T	T	A	C	A	G	G	C	G	G	A	G
3L	+	3L+8569358	FBti0033145	EPgy2	GGGTGTCC	AAGGGGTGTCCTAT		A	A	G	G	G	G	T	G	T	C	C	T	A	T
3L	+	3L+8707027	FBti0027326	EPgy2	CTCTGACT	TGACTCTGACTCGA		T	G	A	C	T	C	T	G	A	C	T	C	G	A
3L	+	3L+8961671	FBti0039406	EPgy2	CGTTCTTT	TTTCGTTCTTTCGA		T	T	T	C	G	T	T	C	T	T	T	C	G	A
3L	+	3L+8968243	FBti0027170	EPgy2	CTGCAGCA	TACCTGCAGCAGAT		T	A	C	C	T	G	C	A	G	C	A	G	A	T
3L	+	3L+9348058	FBti0057747	EPgy2	GCACTGGC	ACGGCACTGGCACT		A	C	G	G	C	A	C	T	G	G	C	A	C	T
3L	+	3L+9366823	FBti0039806	EPgy2	GTCCGCAT	TATGTCCGCATGTA		T	A	T	G	T	C	C	G	C	A	T	G	T	A
3L	+	3L+9377168	FBti0040010	EPgy2	ATCCAGTC	TTAATCCAGTCCGT		T	T	A	A	T	C	C	A	G	T	C	C	G	T
3L	+	3L+9392207	FBti0024902	EPgy2	CCTTCACC	CAGCCTTCACCACT		C	A	G	C	C	T	T	C	A	C	C	A	C	T
3L	+	3L+9403866	FBti0075978	EPgy2	TATTGAAC	TTGTATTGAACTTT		T	T	G	T	A	T	T	G	A	A	C	T	T	T
3L	+	3L+9423436	FBti0039159	EPgy2	GGTCGGAG	ATGGGTCGGAGTTT		A	T	G	G	G	T	C	G	G	A	G	T	T	T
3L	+	3L+9440012	FBti0040106	EPgy2	CCAGTGCC	TGGCCAGTGCCGGG		T	G	G	C	C	A	G	T	G	C	C	G	G	G
3L	+	3L+9453798	FBti0025215	EPgy2	AGTCACAG	AGCAGTCACAGTAC		A	G	C	A	G	T	C	A	C	A	G	T	A	C
3L	+	3L+9470136	FBti0024074	EPgy2	ATCTGATG	TTAATCTGATGGGT		T	T	A	A	T	C	T	G	A	T	G	G	G	T
3L	+	3L+9470515	FBti0040084	EPgy2	CCCGTGCC	AAGCCCGTGCCGAA		A	A	G	C	C	C	G	T	G	C	C	G	A	A
3L	+	3L+9505136	FBti0075444	EPgy2	TTTCGGAT	TTATTTCGGATGTG		T	T	A	T	T	T	C	G	G	A	T	G	T	G
3L	+	3L+9707443	FBti0039769	EPgy2	AGACGATT	AGAAGACGATTTTC		A	G	A	A	G	A	C	G	A	T	T	T	T	C
3L	+	3L+9857141	FBti0038091	EPgy2	GTCTAGTC	AATGTCTAGTCGTA		A	A	T	G	T	C	T	A	G	T	C	G	T	A
3L	+	3L+9858421	FBti0057895	EPgy2	TGGCCACA	AAGTGGCCACACTG		A	A	G	T	G	G	C	C	A	C	A	C	T	G
3L	+	3L+9891714	FBti0038930	EPgy2	CTTGGATT	ATGCTTGGATTTTC		A	T	G	C	T	T	G	G	A	T	T	T	T	C
3L	+	3L+9961593	FBti0038838	EPgy2	CTCTGGGT	TGACTCTGGGTGGA		T	G	A	C	T	C	T	G	G	G	T	G	G	A
3L	+	3L+9965183	FBti0100341	EPgy2	ATCTACAA	GTAATCTACAACCC		G	T	A	A	T	C	T	A	C	A	A	C	C	C
3L	+	3L+9965452	FBti0076118	EPgy2	ACTCAGAC	CAGACTCAGACTCG		C	A	G	A	C	T	C	A	G	A	C	T	C	G
3L	+	3L+10325606	FBti0038689	EPgy2	TCGTGGAC	ATCTCGTGGACATA		A	T	C	T	C	G	T	G	G	A	C	A	T	A
3L	+	3L+10334267	FBti0057997	EPgy2	GATTGAAG	TTGGATTGAAGCGC		T	T	G	G	A	T	T	G	A	A	G	C	G	C
3L	+	3L+10509545	FBti0027053	EPgy2	GGATAGAG	TACGGATAGAGCAT		T	A	C	G	G	A	T	A	G	A	G	C	A	T
3L	+	3L+10630996	FBti0075972	EPgy2	CTCTGGCC	GCACTCTGGCCCAA		G	C	A	C	T	C	T	G	G	C	C	C	A	A
3L	+	3L+10640859	FBti0039360	EPgy2	GGATGCAT	TAGGGATGCATATA		T	A	G	G	G	A	T	G	C	A	T	A	T	A
3L	+	3L+10676378	FBti0039319	EPgy2	GCACAGAC	AATGCACAGACAAG		A	A	T	G	C	A	C	A	G	A	C	A	A	G
3L	+	3L+10679969	FBti0075976	EPgy2	AACTGGCC	TGCAACTGGCCAGA		T	G	C	A	A	C	T	G	G	C	C	A	G	A
3L	+	3L+10684267	FBti0038692	EPgy2	GGTGAGCC	CATGGTGAGCCGTT		C	A	T	G	G	T	G	A	G	C	C	G	T	T
3L	+	3L+10687156	FBti0039490	EPgy2	GTCTGGGA	GTTGTCTGGGAGCT		G	T	T	G	T	C	T	G	G	G	A	G	C	T
3L	+	3L+10959774	FBti0033162	EPgy2	AGCGTGTG	ATCAGCGTGTGCAC		A	T	C	A	G	C	G	T	G	T	G	C	A	C
3L	+	3L+11037907	FBti0027142	EPgy2	GCCCAGAG	CTGGCCCAGAGTGC		C	T	G	G	C	C	C	A	G	A	G	T	G	C
3L	+	3L+11062984	FBti0025267	EPgy2	GTTCACAC	TAGGTTCACACGGA		T	A	G	G	T	T	C	A	C	A	C	G	G	A
3L	+	3L+11067826	FBti0039512	EPgy2	GTCAAACC	CCGGTCAAACCGAT		C	C	G	G	T	C	A	A	A	C	C	G	A	T
3L	+	3L+11083093	FBti0058045	EPgy2	AAAATAGT	AAAAAAATAGTTGT		A	A	A	A	A	A	A	T	A	G	T	T	G	T
3L	+	3L+11089585	FBti0038994	EPgy2	ATCCTGAA	AAGATCCTGAAGGA		A	A	G	A	T	C	C	T	G	A	A	G	G	A
3L	+	3L+11120250	FBti0027285	EPgy2	GTGTCGTG	AGAGTGTCGTGTAT		A	G	A	G	T	G	T	C	G	T	G	T	A	T
3L	+	3L+11162690	FBti0057618	EPgy2	GGCTAATG	ATGGGCTAATGGAA		A	T	G	G	G	C	T	A	A	T	G	G	A	A
3L	+	3L+11203744	FBti0027208	EPgy2	CCTCTTGC	TTGCCTCTTGCTCT		T	T	G	C	C	T	C	T	T	G	C	T	C	T
3L	+	3L+11210262	FBti0024106	EPgy2	CTTTATCC	TATCTTTATCCTAT		T	A	T	C	T	T	T	A	T	C	C	T	A	T
3L	+	3L+11245246	FBti0039920	EPgy2	ACTATTGG	ACTACTATTGGGCT		A	C	T	A	C	T	A	T	T	G	G	G	C	T
3L	+	3L+11466249	FBti0039129	EPgy2	GCGCGCAC	TTGGCGCGCACTGT		T	T	G	G	C	G	C	G	C	A	C	T	G	T
3L	+	3L+11555345	FBti0025130	EPgy2	CCACCAGC	TTGCCACCAGCGAT		T	T	G	C	C	A	C	C	A	G	C	G	A	T
3L	+	3L+11616891	FBti0039393	EPgy2	GTGCCGAG	AGTGTGCCGAGCAA		A	G	T	G	T	G	C	C	G	A	G	C	A	A
3L	+	3L+11641892	FBti0057616	EPgy2	GCCGTGAC	TTAGCCGTGACCTT		T	T	A	G	C	C	G	T	G	A	C	C	T	T
3L	+	3L+11677805	FBti0040193	EPgy2	GCCCAGCA	AGGGCCCAGCAGCT		A	G	G	G	C	C	C	A	G	C	A	G	C	T
3L	+	3L+11808534	FBti0039263	EPgy2	TCCCATAC	CGATCCCATACGAT		C	G	A	T	C	C	C	A	T	A	C	G	A	T
3L	+	3L+11935120	FBti0038908	EPgy2	GGCGAGAG	AGAGGCGAGAGCAA		A	G	A	G	G	C	G	A	G	A	G	C	A	A
3L	+	3L+11997420	FBti0040030	EPgy2	ATCCGATG	TACATCCGATGCGA		T	A	C	A	T	C	C	G	A	T	G	C	G	A
3L	+	3L+12135620	FBti0027387	EPgy2	GTGTCCAT	TGGGTGTCCATTAA		T	G	G	G	T	G	T	C	C	A	T	T	A	A
3L	+	3L+12168728	FBti0058000	EPgy2	GCGGGATG	AGAGCGGGATGACA		A	G	A	G	C	G	G	G	A	T	G	A	C	A
3L	+	3L+12259902	FBti0024136	EPgy2	CGCCGAAC	TCACGCCGAACTAT		T	C	A	C	G	C	C	G	A	A	C	T	A	T
3L	+	3L+12260641	FBti0033131	EPgy2	GGTGGACC	CTGGGTGGACCACT		C	T	G	G	G	T	G	G	A	C	C	A	C	T
3L	+	3L+12290795	FBti0040101	EPgy2	GGTGGACG	ATTGGTGGACGTGA		A	T	T	G	G	T	G	G	A	C	G	T	G	A
3L	+	3L+12384646	FBti0024076	EPgy2	GTGCAGTG	GCAGTGCAGTGTCA		G	C	A	G	T	G	C	A	G	T	G	T	C	A
3L	+	3L+12464924	FBti0024860	EPgy2	GGTCAGCC	ATCGGTCAGCCGGA		A	T	C	G	G	T	C	A	G	C	C	G	G	A
3L	+	3L+12483314	FBti0033124	EPgy2	GCTTGGCC	ATGGCTTGGCCCAT		A	T	G	G	C	T	T	G	G	C	C	C	A	T
3L	+	3L+12494376	FBti0075453	EPgy2	CAGAACGA	CATCAGAACGAAAA		C	A	T	C	A	G	A	A	C	G	A	A	A	A
3L	+	3L+12497391	FBti0039149	EPgy2	GGGGAGAC	TCTGGGGAGACCTT		T	C	T	G	G	G	G	A	G	A	C	C	T	T
3L	+	3L+12728052	FBti0027297	EPgy2	AGCCGTGT	AAAAGCCGTGTGTA		A	A	A	A	G	C	C	G	T	G	T	G	T	A
3L	+	3L+12782986	FBti0039900	EPgy2	GATTGGGT	TTTGATTGGGTTTT		T	T	T	G	A	T	T	G	G	G	T	T	T	T
3L	+	3L+12787818	FBti0039436	EPgy2	GGTGCGAT	AGCGGTGCGATAAG		A	G	C	G	G	T	G	C	G	A	T	A	A	G
3L	+	3L+12799356	FBti0040272	EPgy2	GACGGAAG	CAAGACGGAAGCTT		C	A	A	G	A	C	G	G	A	A	G	C	T	T
3L	+	3L+12807360	FBti0057809	EPgy2	CACCGTCG	TGCCACCGTCGTGA		T	G	C	C	A	C	C	G	T	C	G	T	G	A
3L	+	3L+12807886	FBti0027295	EPgy2	GCCTGACG	ATCGCCTGACGTAT		A	T	C	G	C	C	T	G	A	C	G	T	A	T
3L	+	3L+12826389	FBti0075917	EPgy2	CTTCAGTC	CAACTTCAGTCTAT		C	A	A	C	T	T	C	A	G	T	C	T	A	T
3L	+	3L+12959239	FBti0038801	EPgy2	CTCTGGGC	GGTCTCTGGGCTTT		G	G	T	C	T	C	T	G	G	G	C	T	T	T
3L	+	3L+13008666	FBti0100380	EPgy2	GTTGAATC	GATGTTGAATCGGA		G	A	T	G	T	T	G	A	A	T	C	G	G	A
3L	+	3L+13009211	FBti0039640	EPgy2	TTCTTGGC	ATGTTCTTGGCCAT		A	T	G	T	T	C	T	T	G	G	C	C	A	T
3L	+	3L+13018027	FBti0057604	EPgy2	GCTCAGCA	AGGGCTCAGCAGCT		A	G	G	G	C	T	C	A	G	C	A	G	C	T
3L	+	3L+13282222	FBti0057841	EPgy2	ATCGCGGG	TAGATCGCGGGTAT		T	A	G	A	T	C	G	C	G	G	G	T	A	T
3L	+	3L+13405967	FBti0039014	EPgy2	GTTCGAGG	TCCGTTCGAGGTGT		T	C	C	G	T	T	C	G	A	G	G	T	G	T
3L	+	3L+13495762	FBti0057685	EPgy2	GGTCGTTT	AACGGTCGTTTCAA		A	A	C	G	G	T	C	G	T	T	T	C	A	A
3L	+	3L+13506468	FBti0076110	EPgy2	TGTGTGGG	AGATGTGTGGGTAT		A	G	A	T	G	T	G	T	G	G	G	T	A	T
3L	+	3L+13932312	FBti0040075	EPgy2	GCCTCGCC	AATGCCTCGCCCTG		A	A	T	G	C	C	T	C	G	C	C	C	T	G
3L	+	3L+13958337	FBti0024115	EPgy2	CTCTAGAG	TTTCTCTAGAGCAT		T	T	T	C	T	C	T	A	G	A	G	C	A	T
3L	+	3L+13959588	FBti0025188	EPgy2	GGGAGCAA	CTTGGGAGCAATCA		C	T	T	G	G	G	A	G	C	A	A	T	C	A
3L	+	3L+14030125	FBti0024868	EPgy2	GCCGAACC	ATAGCCGAACCGCT		A	T	A	G	C	C	G	A	A	C	C	G	C	T
3L	+	3L+14043344	FBti0040102	EPgy2	ATACAGAG	TAAATACAGAGTTT		T	A	A	A	T	A	C	A	G	A	G	T	T	T
3L	+	3L+14044328	FBti0076103	EPgy2	GGCGGATG	GGGGGCGGATGAGT		G	G	G	G	G	C	G	G	A	T	G	A	G	T
3L	+	3L+14046334	FBti0027264	EPgy2	GGTGTAGT	GTGGGTGTAGTTGT		G	T	G	G	G	T	G	T	A	G	T	T	G	T
3L	+	3L+14267355	FBti0039656	EPgy2	AGTTGATG	TTAAGTTGATGCCA		T	T	A	A	G	T	T	G	A	T	G	C	C	A
3L	+	3L+14316262	FBti0057741	EPgy2	ATCTGAAG	AGTATCTGAAGTGA		A	G	T	A	T	C	T	G	A	A	G	T	G	A
3L	+	3L+14443884	FBti0057777	EPgy2	CTTCAGCC	TCTCTTCAGCCGCT		T	C	T	C	T	T	C	A	G	C	C	G	C	T
3L	+	3L+14455055	FBti0039223	EPgy2	GGCTAAAC	CACGGCTAAACATT		C	A	C	G	G	C	T	A	A	A	C	A	T	T
3L	+	3L+14530760	FBti0039939	EPgy2	GACCAGAG	ACTGACCAGAGCAT		A	C	T	G	A	C	C	A	G	A	G	C	A	T
3L	+	3L+14755606	FBti0076088	EPgy2	GTTATATC	TTCGTTATATCCCT		T	T	C	G	T	T	A	T	A	T	C	C	C	T
3L	+	3L+14779425	FBti0033336	EPgy2	GCCCTAGA	CAGGCCCTAGATCA		C	A	G	G	C	C	C	T	A	G	A	T	C	A
3L	+	3L+14792503	FBti0038736	EPgy2	CAATTCCG	CGACAATTCCGACC		C	G	A	C	A	A	T	T	C	C	G	A	C	C
3L	+	3L+14962320	FBti0040037	EPgy2	TCTTTTCA	TCTTCTTTTCAATC		T	C	T	T	C	T	T	T	T	C	A	A	T	C
3L	+	3L+14980348	FBti0039994	EPgy2	CAGTAGAC	CAACAGTAGACATG		C	A	A	C	A	G	T	A	G	A	C	A	T	G
3L	+	3L+14992751	FBti0075931	EPgy2	GCACAGAC	AATGCACAGACAAG		A	A	T	G	C	A	C	A	G	A	C	A	A	G
3L	+	3L+15088255	FBti0033387	EPgy2	GTCCAGAC	CAGGTCCAGACCAG		C	A	G	G	T	C	C	A	G	A	C	C	A	G
3L	+	3L+15120744	FBti0027377	EPgy2	GATGGGAA	GCGGATGGGAAATT		G	C	G	G	A	T	G	G	G	A	A	A	T	T
3L	+	3L+15505297	FBti0039255	EPgy2	TTCTAGAC	ATCTTCTAGACTTT		A	T	C	T	T	C	T	A	G	A	C	T	T	T
3L	+	3L+15547284	FBti0039187	EPgy2	CGCTCGAC	ATCCGCTCGACAGC		A	T	C	C	G	C	T	C	G	A	C	A	G	C
3L	+	3L+15641244	FBti0039621	EPgy2	GGCTATAC	AATGGCTATACACA		A	A	T	G	G	C	T	A	T	A	C	A	C	A
3L	+	3L+15942899	FBti0027151	EPgy2	CCTGCAAC	ACACCTGCAACCAT		A	C	A	C	C	T	G	C	A	A	C	C	A	T
3L	+	3L+15949424	FBti0040143	EPgy2	ATCCTGAT	AGTATCCTGATTGT		A	G	T	A	T	C	C	T	G	A	T	T	G	T
3L	+	3L+15961320	FBti0057999	EPgy2	GCCACAAC	TAAGCCACAACACC		T	A	A	G	C	C	A	C	A	A	C	A	C	C
3L	+	3L+15976249	FBti0038704	EPgy2	ATCGCACC	ATCATCGCACCAAT		A	T	C	A	T	C	G	C	A	C	C	A	A	T
3L	+	3L+16004845	FBti0038954	EPgy2	GTACCTGG	ACAGTACCTGGTCT		A	C	A	G	T	A	C	C	T	G	G	T	C	T
3L	+	3L+16033067	FBti0075878	EPgy2	CTCTCGTT	ATACTCTCGTTCAC		A	T	A	C	T	C	T	C	G	T	T	C	A	C
3L	+	3L+16099095	FBti0027363	EPgy2	AGTCCACG	AATAGTCCACGGAA		A	A	T	A	G	T	C	C	A	C	G	G	A	A
3L	+	3L+16106341	FBti0039671	EPgy2	CTCTGGAG	AATCTCTGGAGGTA		A	A	T	C	T	C	T	G	G	A	G	G	T	A
3L	+	3L+16122711	FBti0039682	EPgy2	GGCGCAGC	TTAGGCGCAGCTTA		T	T	A	G	G	C	G	C	A	G	C	T	T	A
3L	+	3L+16135700	FBti0039277	EPgy2	GGCGGTCG	TTGGGCGGTCGAGG		T	T	G	G	G	C	G	G	T	C	G	A	G	G
3L	+	3L+16166435	FBti0027184	EPgy2	GTCCCAGG	ACTGTCCCAGGGCA		A	C	T	G	T	C	C	C	A	G	G	G	C	A
3L	+	3L+16187093	FBti0027212	EPgy2	CTATGTAC	TAGCTATGTACATT		T	A	G	C	T	A	T	G	T	A	C	A	T	T
3L	+	3L+16361441	FBti0039218	EPgy2	GTACACAG	AGCGTACACAGCAT		A	G	C	G	T	A	C	A	C	A	G	C	A	T
3L	+	3L+16478263	FBti0033275	EPgy2	GTCCACTG	ATAGTCCACTGTTT		A	T	A	G	T	C	C	A	C	T	G	T	T	T
3L	+	3L+16605060	FBti0057839	EPgy2	TGACCAGC	GTGTGACCAGCGCC		G	T	G	T	G	A	C	C	A	G	C	G	C	C
3L	+	3L+16692363	FBti0027177	EPgy2	GGCCGATC	ACAGGCCGATCAGT		A	C	A	G	G	C	C	G	A	T	C	A	G	T
3L	+	3L+16759199	FBti0040025	EPgy2	GTCTGGAT	ACGGTCTGGATATT		A	C	G	G	T	C	T	G	G	A	T	A	T	T
3L	+	3L+16835369	FBti0039586	EPgy2	GCTTGTAT	GTGGCTTGTATTGT		G	T	G	G	C	T	T	G	T	A	T	T	G	T
3L	+	3L+16870399	FBti0075943	EPgy2	GGCCAAAC	GCGGGCCAAACGCT		G	C	G	G	G	C	C	A	A	A	C	G	C	T
3L	+	3L+16884255	FBti0057675	EPgy2	GTTTGTCT	TTGGTTTGTCTGAT		T	T	G	G	T	T	T	G	T	C	T	G	A	T
3L	+	3L+16948579	FBti0025140	EPgy2	ATCCAAAG	CTGATCCAAAGTAA		C	T	G	A	T	C	C	A	A	A	G	T	A	A
3L	+	3L+16969409	FBti0038961	EPgy2	TTTGGTGA	TACTTTGGTGAGTG		T	A	C	T	T	T	G	G	T	G	A	G	T	G
3L	+	3L+16984117	FBti0027597	EPgy2	CTCCCAAT	ATACTCCCAATGTT		A	T	A	C	T	C	C	C	A	A	T	G	T	T
3L	+	3L+17017464	FBti0039541	EPgy2	AGCGGAAC	ATAAGCGGAACAGC		A	T	A	A	G	C	G	G	A	A	C	A	G	C
3L	+	3L+17025306	FBti0039547	EPgy2	GTTATGCT	TCCGTTATGCTTAG		T	C	C	G	T	T	A	T	G	C	T	T	A	G
3L	+	3L+17042612	FBti0057914	EPgy2	GTTCGGAA	TCAGTTCGGAATCA		T	C	A	G	T	T	C	G	G	A	A	T	C	A
3L	+	3L+17044413	FBti0027454	EPgy2	CTCTGACC	AAACTCTGACCAAT		A	A	A	C	T	C	T	G	A	C	C	A	A	T
3L	+	3L+17048692	FBti0027120	EPgy2	CGGCGGTG	CCGCGGCGGTGGAA		C	C	G	C	G	G	C	G	G	T	G	G	A	A
3L	+	3L+17235165	FBti0039169	EPgy2	GTCTGGCG	ACAGTCTGGCGCCT		A	C	A	G	T	C	T	G	G	C	G	C	C	T
3L	+	3L+17418586	FBti0039172	EPgy2	GCGTGGCT	ACTGCGTGGCTGCT		A	C	T	G	C	G	T	G	G	C	T	G	C	T
3L	+	3L+17506734	FBti0039193	EPgy2	GGCTCACC	AAAGGCTCACCTGT		A	A	A	G	G	C	T	C	A	C	C	T	G	T
3L	+	3L+17526227	FBti0025131	EPgy2	CGTTCGGT	GTGCGTTCGGTGTG		G	T	G	C	G	T	T	C	G	G	T	G	T	G
3L	+	3L+17583947	FBti0024866	EPgy2	GGTAAGCC	GTAGGTAAGCCCTT		G	T	A	G	G	T	A	A	G	C	C	C	T	T
3L	+	3L+17652281	FBti0039106	EPgy2	GGCACCTC	TATGGCACCTCTAT		T	A	T	G	G	C	A	C	C	T	C	T	A	T
3L	+	3L+17733856	FBti0039469	EPgy2	TCAACACT	TGGTCAACACTGCG		T	G	G	T	C	A	A	C	A	C	T	G	C	G
3L	+	3L+17850477	FBti0027386	EPgy2	CGCCAAAC	ACACGCCAAACTGA		A	C	A	C	G	C	C	A	A	A	C	T	G	A
3L	+	3L+17888803	FBti0027303	EPgy2	GTTTAATT	TGGGTTTAATTGTT		T	G	G	G	T	T	T	A	A	T	T	G	T	T
3L	+	3L+17954839	FBti0075847	EPgy2	GGCGAGCA	AGTGGCGAGCACTT		A	G	T	G	G	C	G	A	G	C	A	C	T	T
3L	+	3L+18007576	FBti0057934	EPgy2	GCCCAGCC	GTGGCCCAGCCAGA		G	T	G	G	C	C	C	A	G	C	C	A	G	A
3L	+	3L+18009786	FBti0039979	EPgy2	CTCCTGCC	TCACTCCTGCCCAT		T	C	A	C	T	C	C	T	G	C	C	C	A	T
3L	+	3L+18227550	FBti0033250	EPgy2	CTTTTGCC	GTACTTTTGCCCTT		G	T	A	C	T	T	T	T	G	C	C	C	T	T
3L	+	3L+18229784	FBti0025237	EPgy2	GAGCGGAG	AGGGAGCGGAGCTT		A	G	G	G	A	G	C	G	G	A	G	C	T	T
3L	+	3L+18456346	FBti0039335	EPgy2	GGCGCACA	ATGGGCGCACACAA		A	T	G	G	G	C	G	C	A	C	A	C	A	A
3L	+	3L+18666236	FBti0039696	EPgy2	GGCCAATC	TAAGGCCAATCAAC		T	A	A	G	G	C	C	A	A	T	C	A	A	C
3L	+	3L+18741888	FBti0039531	EPgy2	GTTTCTAA	ACAGTTTCTAACTC		A	C	A	G	T	T	T	C	T	A	A	C	T	C
3L	+	3L+18780236	FBti0057645	EPgy2	GTCCAGTC	ATAGTCCAGTCGAT		A	T	A	G	T	C	C	A	G	T	C	G	A	T
3L	+	3L+18784696	FBti0039544	EPgy2	ATTCTGAT	ATAATTCTGATTTT		A	T	A	A	T	T	C	T	G	A	T	T	T	T
3L	+	3L+18814293	FBti0038969	EPgy2	TACTAAAC	CAATACTAAACATT		C	A	A	T	A	C	T	A	A	A	C	A	T	T
3L	+	3L+18834631	FBti0058006	EPgy2	CGACAGCA	AAACGACAGCATGA		A	A	A	C	G	A	C	A	G	C	A	T	G	A
3L	+	3L+18884103	FBti0024848	EPgy2	GTCTTATC	ATAGTCTTATCAAC		A	T	A	G	T	C	T	T	A	T	C	A	A	C
3L	+	3L+18894615	FBti0075963	EPgy2	ATTCGGGC	GCCATTCGGGCTAA		G	C	C	A	T	T	C	G	G	G	C	T	A	A
3L	+	3L+18898056	FBti0039310	EPgy2	CCGCCGCC	CGGCCGCCGCCGAC		C	G	G	C	C	G	C	C	G	C	C	G	A	C
3L	+	3L+18898513	FBti0039458	EPgy2	TGTCTAAC	CATTGTCTAACATT		C	A	T	T	G	T	C	T	A	A	C	A	T	T
3L	+	3L+18939151	FBti0039124	EPgy2	GTTTCATC	TCAGTTTCATCAGT		T	C	A	G	T	T	T	C	A	T	C	A	G	T
3L	+	3L+18988859	FBti0039432	EPgy2	GGCCAAAC	TTAGGCCAAACCAA		T	T	A	G	G	C	C	A	A	A	C	C	A	A
3L	+	3L+19056345	FBti0027154	EPgy2	CGGGGCAG	CAGCGGGGCAGCCG		C	A	G	C	G	G	G	G	C	A	G	C	C	G
3L	+	3L+19248618	FBti0057978	EPgy2	GGCCTAGC	AATGGCCTAGCTGT		A	A	T	G	G	C	C	T	A	G	C	T	G	T
3L	+	3L+19254590	FBti0038750	EPgy2	CTCAAACG	ACGCTCAAACGTTG		A	C	G	C	T	C	A	A	A	C	G	T	T	G
3L	+	3L+19257703	FBti0027166	EPgy2	GGCCGAAC	AGGGGCCGAACTGG		A	G	G	G	G	C	C	G	A	A	C	T	G	G
3L	+	3L+19614117	FBti0033146	EPgy2	GGCGGTCG	CTGGGCGGTCGCGT		C	T	G	G	G	C	G	G	T	C	G	C	G	T
3L	+	3L+19635170	FBti0038882	EPgy2	TTCTGTAT	ATCTTCTGTATCCG		A	T	C	T	T	C	T	G	T	A	T	C	C	G
3L	+	3L+19838452	FBti0038877	EPgy2	GCGTAGGA	TTGGCGTAGGACGC		T	T	G	G	C	G	T	A	G	G	A	C	G	C
3L	+	3L+19898108	FBti0039549	EPgy2	ACCACGCC	ATAACCACGCCTCT		A	T	A	A	C	C	A	C	G	C	C	T	C	T
3L	+	3L+19994229	FBti0039111	EPgy2	AGCGGAGC	ATAAGCGGAGCCAA		A	T	A	A	G	C	G	G	A	G	C	C	A	A
3L	+	3L+19995865	FBti0075929	EPgy2	GAGCGACC	ATTGAGCGACCATT		A	T	T	G	A	G	C	G	A	C	C	A	T	T
3L	+	3L+20191332	FBti0033123	EPgy2	CTTGTGCC	GTGCTTGTGCCGTA		G	T	G	C	T	T	G	T	G	C	C	G	T	A
3L	+	3L+20224717	FBti0075449	EPgy2	GCGTAGCC	GAAGCGTAGCCCAA		G	A	A	G	C	G	T	A	G	C	C	C	A	A
3L	+	3L+20240969	FBti0038688	EPgy2	GGCCAGTC	TTGGGCCAGTCAAC		T	T	G	G	G	C	C	A	G	T	C	A	A	C
3L	+	3L+20358266	FBti0057904	EPgy2	GTGTGTAC	ATAGTGTGTACGAG		A	T	A	G	T	G	T	G	T	A	C	G	A	G
3L	+	3L+20386604	FBti0075899	EPgy2	GCCCAACC	GCCGCCCAACCAAA		G	C	C	G	C	C	C	A	A	C	C	A	A	A
3L	+	3L+20423552	FBti0038079	EPgy2	GTTCTAAC	TTTGTTCTAACTGT		T	T	T	G	T	T	C	T	A	A	C	T	G	T
3L	+	3L+20447620	FBti0040095	EPgy2	GTTTTGAC	TCAGTTTTGACGCT		T	C	A	G	T	T	T	T	G	A	C	G	C	T
3L	+	3L+20487901	FBti0027395	EPgy2	GCGTAGAC	TAGGCGTAGACGTA		T	A	G	G	C	G	T	A	G	A	C	G	T	A
3L	+	3L+20502928	FBti0039659	EPgy2	GTCCGTAC	AATGTCCGTACCGT		A	A	T	G	T	C	C	G	T	A	C	C	G	T
3L	+	3L+20510648	FBti0027301	EPgy2	GCTACGAC	GAGGCTACGACCGT		G	A	G	G	C	T	A	C	G	A	C	C	G	T
3L	+	3L+20775942	FBti0040230	EPgy2	GTTGAAAC	AGCGTTGAAACTGA		A	G	C	G	T	T	G	A	A	A	C	T	G	A
3L	+	3L+20781198	FBti0039203	EPgy2	CCCCGTGC	AAACCCCGTGCCAT		A	A	A	C	C	C	C	G	T	G	C	C	A	T
3L	+	3L+20802466	FBti0040170	EPgy2	GTGCAGCC	ACAGTGCAGCCTTT		A	C	A	G	T	G	C	A	G	C	C	T	T	T
3L	+	3L+20809228	FBti0076117	EPgy2	AGCAGTGG	ATGAGCAGTGGTGC		A	T	G	A	G	C	A	G	T	G	G	T	G	C
3L	+	3L+21021057	FBti0057694	EPgy2	TACATATC	ATATACATATCTAT		A	T	A	T	A	C	A	T	A	T	C	T	A	T
3L	+	3L+21027633	FBti0040196	EPgy2	GCGCAAAC	TTGGCGCAAACATA		T	T	G	G	C	G	C	A	A	A	C	A	T	A
3L	+	3L+21196208	FBti0024065	EPgy2	GCTTGGCG	ATTGCTTGGCGGTT		A	T	T	G	C	T	T	G	G	C	G	G	T	T
3L	+	3L+21204835	FBti0075975	EPgy2	GTCTACAC	TATGTCTACACCTT		T	A	T	G	T	C	T	A	C	A	C	C	T	T
3L	+	3L+21261131	FBti0039587	EPgy2	GTTGGAAC	TCCGTTGGAACCGA		T	C	C	G	T	T	G	G	A	A	C	C	G	A
3L	+	3L+21270267	FBti0039688	EPgy2	CTCTGCTC	TAGCTCTGCTCTGC		T	A	G	C	T	C	T	G	C	T	C	T	G	C
3L	+	3L+21279250	FBti0057620	EPgy2	CACTGAGC	TTCCACTGAGCCAA		T	T	C	C	A	C	T	G	A	G	C	C	A	A
3L	+	3L+21375617	FBti0039735	EPgy2	CTGGGGGC	ACACTGGGGGCTGA		A	C	A	C	T	G	G	G	G	G	C	T	G	A
3L	+	3L+21516684	FBti0039476	EPgy2	AACCAGTC	AAGAACCAGTCTAT		A	A	G	A	A	C	C	A	G	T	C	T	A	T
3L	+	3L+21526794	FBti0057925	EPgy2	GGCTGCAG	AGGGGCTGCAGTAT		A	G	G	G	G	C	T	G	C	A	G	T	A	T
3L	+	3L+21532979	FBti0024867	EPgy2	GCAGCAGC	TCAGCAGCAGCAAA		T	C	A	G	C	A	G	C	A	G	C	A	A	A
3L	+	3L+21561947	FBti0039138	EPgy2	GCCCACCT	TTAGCCCACCTCAT		T	T	A	G	C	C	C	A	C	C	T	C	A	T
3L	+	3L+21619418	FBti0039019	EPgy2	GCCCAACT	TTTGCCCAACTAAC		T	T	T	G	C	C	C	A	A	C	T	A	A	C
3L	+	3L+21627491	FBti0075938	EPgy2	AGTAGTAC	AGCAGTAGTACTTT		A	G	C	A	G	T	A	G	T	A	C	T	T	T
3L	+	3L+21627664	FBti0025182	EPgy2	GGTGGTTC	TGGGGTGGTTCCGA		T	G	G	G	G	T	G	G	T	T	C	C	G	A
3L	+	3L+21721757	FBti0057630	EPgy2	GTTACTAT	TCAGTTACTATTAA		T	C	A	G	T	T	A	C	T	A	T	T	A	A
3L	+	3L+21817195	FBti0075461	EPgy2	ATCCACAC	TTCATCCACACCAG		T	T	C	A	T	C	C	A	C	A	C	C	A	G
3L	+	3L+21836663	FBti0075950	EPgy2	CCCCTATC	AGACCCCTATCCGA		A	G	A	C	C	C	C	T	A	T	C	C	G	A
3L	+	3L+21872674	FBti0057656	EPgy2	CGGCATAC	TTTCGGCATACTTT		T	T	T	C	G	G	C	A	T	A	C	T	T	T
3L	+	3L+21934852	FBti0038759	EPgy2	CTCCAGTG	TCACTCCAGTGATA		T	C	A	C	T	C	C	A	G	T	G	A	T	A
3L	+	3L+22028076	FBti0024071	EPgy2	CAACGAAC	CGGCAACGAACGAA		C	G	G	C	A	A	C	G	A	A	C	G	A	A
3L	+	3L+22067587	FBti0027375	EPgy2	GGCATATG	GGGGGCATATGTAA		G	G	G	G	G	C	A	T	A	T	G	T	A	A
3L	+	3L+22082127	FBti0024104	EPgy2	GTTATGGC	ATGGTTATGGCTAC		A	T	G	G	T	T	A	T	G	G	C	T	A	C
3L	+	3L+22281795	FBti0039917	EPgy2	GGCCAGAA	AGTGGCCAGAAAGA		A	G	T	G	G	C	C	A	G	A	A	A	G	A
3L	+	3L+22454268	FBti0039183	EPgy2	GTGCTACC	TATGTGCTACCCAA		T	A	T	G	T	G	C	T	A	C	C	C	A	A
3L	+	3L+22662966	FBti0076146	EPgy2	TCTGGCCC	CCATCTGGCCCCAA		C	C	A	T	C	T	G	G	C	C	C	C	A	A
3L	+	3L+22681811	FBti0039140	EPgy2	GTGCAGCC	GTGGTGCAGCCTTC		G	T	G	G	T	G	C	A	G	C	C	T	T	C
3L	+	3L+22714185	FBti0024898	EPgy2	AGACCGTC	TTAAGACCGTCAAC		T	T	A	A	G	A	C	C	G	T	C	A	A	C
3L	+	3L+22717428	FBti0033386	EPgy2	GTCCGCAC	ACAGTCCGCACAAG		A	C	A	G	T	C	C	G	C	A	C	A	A	G
3L	+	3L+22721217	FBti0040028	EPgy2	GCTGAGCG	CGAGCTGAGCGCAT		C	G	A	G	C	T	G	A	G	C	G	C	A	T
3L	+	3L+22735143	FBti0033374	EPgy2	CTCTCATG	ACGCTCTCATGTTT		A	C	G	C	T	C	T	C	A	T	G	T	T	T
3L	+	3L+22773928	FBti0033137	EPgy2	CGCTAGCC	AGACGCTAGCCGTG		A	G	A	C	G	C	T	A	G	C	C	G	T	G
3L	+	3L+22826124	FBti0057938	EPgy2	GTGCAGCG	AACGTGCAGCGCAC		A	A	C	G	T	G	C	A	G	C	G	C	A	C
3L	+	3L+22864990	FBti0024887	EPgy2	CGCTGCTC	TGTCGCTGCTCCAA		T	G	T	C	G	C	T	G	C	T	C	C	A	A
3L	+	3L+22865252	FBti0027029	EPgy2	ACTGGCAT	ATAACTGGCATATT		A	T	A	A	C	T	G	G	C	A	T	A	T	T
3L	+	3L+22882330	FBti0039918	EPgy2	CTATGGCA	CAACTATGGCACAC		C	A	A	C	T	A	T	G	G	C	A	C	A	C
3R	+	3R+22973	FBti0038926	EPgy2	GTACAGTG	ACTGTACAGTGGTC		A	C	T	G	T	A	C	A	G	T	G	G	T	C
3R	+	3R+58054	FBti0027091	EPgy2	ACCCAGAC	AAGACCCAGACCAC		A	A	G	A	C	C	C	A	G	A	C	C	A	C
3R	+	3R+77063	FBti0038851	EPgy2	GTTCAGTT	TGGGTTCAGTTTGA		T	G	G	G	T	T	C	A	G	T	T	T	G	A
3R	+	3R+83373	FBti0075867	EPgy2	CACATGAC	GCACACATGACCAA		G	C	A	C	A	C	A	T	G	A	C	C	A	A
3R	+	3R+137320	FBti0040284	EPgy2	CATACAAC	ATACATACAACTAA		A	T	A	C	A	T	A	C	A	A	C	T	A	A
3R	+	3R+163545	FBti0025138	EPgy2	GCTTCGTC	ATCGCTTCGTCGCA		A	T	C	G	C	T	T	C	G	T	C	G	C	A
3R	+	3R+172398	FBti0040050	EPgy2	GTTCCCGC	TCCGTTCCCGCATT		T	C	C	G	T	T	C	C	C	G	C	A	T	T
3R	+	3R+181458	FBti0057700	EPgy2	ATCCAATC	TCCATCCAATCCAT		T	C	C	A	T	C	C	A	A	T	C	C	A	T
3R	+	3R+204648	FBti0025204	EPgy2	GACAAAAC	GTGGACAAAACGAA		G	T	G	G	A	C	A	A	A	A	C	G	A	A
3R	+	3R+216113	FBti0027320	EPgy2	GTGCGCGT	AATGTGCGCGTGAG		A	A	T	G	T	G	C	G	C	G	T	G	A	G
3R	+	3R+228805	FBti0057655	EPgy2	CTATACGC	TTGCTATACGCTCT		T	T	G	C	T	A	T	A	C	G	C	T	C	T
3R	+	3R+298587	FBti0024900	EPgy2	CATTGAAG	TTTCATTGAAGTGT		T	T	T	C	A	T	T	G	A	A	G	T	G	T
3R	+	3R+310780	FBti0075872	EPgy2	CACTGCAG	ATACACTGCAGTAT		A	T	A	C	A	C	T	G	C	A	G	T	A	T
3R	+	3R+370406	FBti0057860	EPgy2	CTCAAGAA	ACACTCAAGAAGAA		A	C	A	C	T	C	A	A	G	A	A	G	A	A
3R	+	3R+373250	FBti0075945	EPgy2	AGTCGTCG	AGGAGTCGTCGTGG		A	G	G	A	G	T	C	G	T	C	G	T	G	G
3R	+	3R+394475	FBti0057965	EPgy2	GTCAGGAT	ATTGTCAGGATGTA		A	T	T	G	T	C	A	G	G	A	T	G	T	A
3R	+	3R+436312	FBti0038735	EPgy2	GTTTCGGT	TTCGTTTCGGTCAT		T	T	C	G	T	T	T	C	G	G	T	C	A	T
3R	+	3R+485297	FBti0057952	EPgy2	GCCTATGG	ATTGCCTATGGTAA		A	T	T	G	C	C	T	A	T	G	G	T	A	A
3R	+	3R+540080	FBti0027223	EPgy2	GTTTAAGC	TCGGTTTAAGCTTT		T	C	G	G	T	T	T	A	A	G	C	T	T	T
3R	+	3R+574495	FBti0039516	EPgy2	ACACACGC	ACAACACACGCACA		A	C	A	A	C	A	C	A	C	G	C	A	C	A
3R	+	3R+636017	FBti0057918	EPgy2	GAATAGAG	ATGGAATAGAGCCA		A	T	G	G	A	A	T	A	G	A	G	C	C	A
3R	+	3R+637794	FBti0039161	EPgy2	GTTGGGAG	GATGTTGGGAGTCT		G	A	T	G	T	T	G	G	G	A	G	T	C	T
3R	+	3R+773654	FBti0027290	EPgy2	CAGCGATC	ACGCAGCGATCCAA		A	C	G	C	A	G	C	G	A	T	C	C	A	A
3R	+	3R+860448	FBti0027104	EPgy2	GTACGGGG	TAGGTACGGGGCTA		T	A	G	G	T	A	C	G	G	G	G	C	T	A
3R	+	3R+953880	FBti0027185	EPgy2	GGTTGGGG	GCTGGTTGGGGCAA		G	C	T	G	G	T	T	G	G	G	G	C	A	A
3R	+	3R+1051956	FBti0039932	EPgy2	CTCCGTTG	TAACTCCGTTGAAA		T	A	A	C	T	C	C	G	T	T	G	A	A	A
3R	+	3R+1057890	FBti0033323	EPgy2	GTTCAGCC	TAAGTTCAGCCAAA		T	A	A	G	T	T	C	A	G	C	C	A	A	A
3R	+	3R+1090648	FBti0040045	EPgy2	GTCACCAC	TTAGTCACCACCAA		T	T	A	G	T	C	A	C	C	A	C	C	A	A
3R	+	3R+1096277	FBti0057863	EPgy2	GCACTTGA	CAGGCACTTGACAT		C	A	G	G	C	A	C	T	T	G	A	C	A	T
3R	+	3R+1229865	FBti0039603	EPgy2	TTTTGGAG	TAGTTTTGGAGCCA		T	A	G	T	T	T	T	G	G	A	G	C	C	A
3R	+	3R+1300625	FBti0057921	EPgy2	ACCGAATC	ATCACCGAATCCAT		A	T	C	A	C	C	G	A	A	T	C	C	A	T
3R	+	3R+1329646	FBti0039447	EPgy2	GTTTCATT	CTCGTTTCATTTAT		C	T	C	G	T	T	T	C	A	T	T	T	A	T
3R	+	3R+1373478	FBti0024134	EPgy2	TTCAGTAC	TTGTTCAGTACGAA		T	T	G	T	T	C	A	G	T	A	C	G	A	A
3R	+	3R+1396848	FBti0039705	EPgy2	CCCTAGAG	TCACCCTAGAGGTT		T	C	A	C	C	C	T	A	G	A	G	G	T	T
3R	+	3R+1414541	FBti0075856	EPgy2	CGACAGGC	GGACGACAGGCCAA		G	G	A	C	G	A	C	A	G	G	C	C	A	A
3R	+	3R+1463017	FBti0027312	EPgy2	AACTAGGC	TCAAACTAGGCGAT		T	C	A	A	A	C	T	A	G	G	C	G	A	T
3R	+	3R+1474542	FBti0024845	EPgy2	GGCTCGGG	AGAGGCTCGGGCAT		A	G	A	G	G	C	T	C	G	G	G	C	A	T
3R	+	3R+1474823	FBti0039933	EPgy2	GCCGAGCC	AGCGCCGAGCCTAA		A	G	C	G	C	C	G	A	G	C	C	T	A	A
3R	+	3R+1498529	FBti0027190	EPgy2	GCTCCGAC	AGAGCTCCGACCAG		A	G	A	G	C	T	C	C	G	A	C	C	A	G
3R	+	3R+1527999	FBti0024096	EPgy2	GAGTGGAC	TGGGAGTGGACCGA		T	G	G	G	A	G	T	G	G	A	C	C	G	A
3R	+	3R+1687662	FBti0039125	EPgy2	TATCAGAC	ATATATCAGACTTT		A	T	A	T	A	T	C	A	G	A	C	T	T	T
3R	+	3R+1828793	FBti0057611	EPgy2	GTCTGGCG	TTGGTCTGGCGCGT		T	T	G	G	T	C	T	G	G	C	G	C	G	T
3R	+	3R+1932297	FBti0038686	EPgy2	GGCCGTAC	CTGGGCCGTACACT		C	T	G	G	G	C	C	G	T	A	C	A	C	T
3R	+	3R+2194695	FBti0058047	EPgy2	GTCTGGCT	TGAGTCTGGCTTGC		T	G	A	G	T	C	T	G	G	C	T	T	G	C
3R	+	3R+2205892	FBti0027607	EPgy2	GTGGAAAG	ATAGTGGAAAGCAT		A	T	A	G	T	G	G	A	A	A	G	C	A	T
3R	+	3R+2231539	FBti0100346	EPgy2	AGCTGAGC	ATCAGCTGAGCGAG		A	T	C	A	G	C	T	G	A	G	C	G	A	G
3R	+	3R+2236044	FBti0040083	EPgy2	CCACAAAC	GCACCACAAACTAA		G	C	A	C	C	A	C	A	A	A	C	T	A	A
3R	+	3R+2361297	FBti0039374	EPgy2	GTCTGAAG	TTTGTCTGAAGTCT		T	T	T	G	T	C	T	G	A	A	G	T	C	T
3R	+	3R+2483072	FBti0075842	EPgy2	GACCGAGG	AAAGACCGAGGAAA		A	A	A	G	A	C	C	G	A	G	G	A	A	A
3R	+	3R+2911357	FBti0024123	EPgy2	AGCTAAAC	TACAGCTAAACATT		T	A	C	A	G	C	T	A	A	A	C	A	T	T
3R	+	3R+2912269	FBti0027178	EPgy2	CCCTAGCC	ACCCCCTAGCCCAA		A	C	C	C	C	C	T	A	G	C	C	C	A	A
3R	+	3R+2929304	FBti0057861	EPgy2	GTCCAGCC	ACCGTCCAGCCCGC		A	C	C	G	T	C	C	A	G	C	C	C	G	C
3R	+	3R+2939063	FBti0040184	EPgy2	ATCGTAAC	TTGATCGTAACGTA		T	T	G	A	T	C	G	T	A	A	C	G	T	A
3R	+	3R+2949869	FBti0040096	EPgy2	GCGGCGAC	TCGGCGGCGACCAC		T	C	G	G	C	G	G	C	G	A	C	C	A	C
3R	+	3R+3012707	FBti0039461	EPgy2	GTGGGGAG	AAAGTGGGGAGAAA		A	A	A	G	T	G	G	G	G	A	G	A	A	A
3R	+	3R+3013042	FBti0057956	EPgy2	GTTCCGCC	ATAGTTCCGCCTGT		A	T	A	G	T	T	C	C	G	C	C	T	G	T
3R	+	3R+3091721	FBti0038902	EPgy2	GCTCTGTG	AATGCTCTGTGTCG		A	A	T	G	C	T	C	T	G	T	G	T	C	G
3R	+	3R+3093283	FBti0040271	EPgy2	ATCGGAAC	CTTATCGGAACAGT		C	T	T	A	T	C	G	G	A	A	C	A	G	T
3R	+	3R+3175658	FBti0057812	EPgy2	AGCTGTGC	AACAGCTGTGCTCT		A	A	C	A	G	C	T	G	T	G	C	T	C	T
3R	+	3R+3301070	FBti0024140	EPgy2	TGTGGCAG	TTGTGTGGCAGTGA		T	T	G	T	G	T	G	G	C	A	G	T	G	A
3R	+	3R+3718099	FBti0075868	EPgy2	GCTGTGGG	TTAGCTGTGGGCAA		T	T	A	G	C	T	G	T	G	G	G	C	A	A
3R	+	3R+3739455	FBti0039274	EPgy2	GCACACAC	CGGGCACACACCCC		C	G	G	G	C	A	C	A	C	A	C	C	C	C
3R	+	3R+3821695	FBti0033350	EPgy2	GCCTAAGC	GCTGCCTAAGCCAA		G	C	T	G	C	C	T	A	A	G	C	C	A	A
3R	+	3R+3839527	FBti0027379	EPgy2	GCCAAGAC	TTGGCCAAGACAGT		T	T	G	G	C	C	A	A	G	A	C	A	G	T
3R	+	3R+3859071	FBti0039676	EPgy2	GAGTGTGC	TCAGAGTGTGCTCA		T	C	A	G	A	G	T	G	T	G	C	T	C	A
3R	+	3R+3916296	FBti0027200	EPgy2	GTGCTGAC	ATCGTGCTGACCGC		A	T	C	G	T	G	C	T	G	A	C	C	G	C
3R	+	3R+3919805	FBti0038984	EPgy2	GGGCGGCC	TATGGGCGGCCATT		T	A	T	G	G	G	C	G	G	C	C	A	T	T
3R	+	3R+3931111	FBti0039800	EPgy2	TCTAAGGC	ATCTCTAAGGCCCT		A	T	C	T	C	T	A	A	G	G	C	C	C	T
3R	+	3R+4138944	FBti0057889	EPgy2	AAAGACAG	GCCAAAGACAGCGC		G	C	C	A	A	A	G	A	C	A	G	C	G	C
3R	+	3R+4188239	FBti0076027	EPgy2	ACACTCAG	AATACACTCAGCGA		A	A	T	A	C	A	C	T	C	A	G	C	G	A
3R	+	3R+4387342	FBti0027102	EPgy2	TGCCGGCT	ATGTGCCGGCTACT		A	T	G	T	G	C	C	G	G	C	T	A	C	T
3R	+	3R+4489467	FBti0024879	EPgy2	GGAATACA	TGGGGAATACATAC		T	G	G	G	G	A	A	T	A	C	A	T	A	C
3R	+	3R+4495305	FBti0039858	EPgy2	CTCTGGCA	TCTCTCTGGCACTT		T	C	T	C	T	C	T	G	G	C	A	C	T	T
3R	+	3R+4502358	FBti0038854	EPgy2	ATACACAC	TGTATACACACGCA		T	G	T	A	T	A	C	A	C	A	C	G	C	A
3R	+	3R+4548936	FBti0039339	EPgy2	GACGGAGC	ATGGACGGAGCGAG		A	T	G	G	A	C	G	G	A	G	C	G	A	G
3R	+	3R+4557818	FBti0025213	EPgy2	CGCTCACG	CAACGCTCACGCCA		C	A	A	C	G	C	T	C	A	C	G	C	C	A
3R	+	3R+4650172	FBti0038757	EPgy2	AGCGGGCG	AGTAGCGGGCGTCT		A	G	T	A	G	C	G	G	G	C	G	T	C	T
3R	+	3R+4699417	FBti0039176	EPgy2	CTCATTCG	AAGCTCATTCGCGT		A	A	G	C	T	C	A	T	T	C	G	C	G	T
3R	+	3R+4721670	FBti0025185	EPgy2	ATTGGAGA	TTCATTGGAGACAA		T	T	C	A	T	T	G	G	A	G	A	C	A	A
3R	+	3R+4770664	FBti0025199	EPgy2	CTTCCTAC	TCCCTTCCTACCCT		T	C	C	C	T	T	C	C	T	A	C	C	C	T
3R	+	3R+4806952	FBti0027127	EPgy2	CAGGGGGG	TTCCAGGGGGGGGG		T	T	C	C	A	G	G	G	G	G	G	G	G	G
3R	+	3R+4840864	FBti0057975	EPgy2	GTACAATC	GCCGTACAATCCCA		G	C	C	G	T	A	C	A	A	T	C	C	C	A
3R	+	3R+4845647	FBti0033249	EPgy2	GTCCAGCC	AAAGTCCAGCCTGG		A	A	A	G	T	C	C	A	G	C	C	T	G	G
3R	+	3R+4865526	FBti0039383	EPgy2	CAACGGCC	AAACAACGGCCCAC		A	A	A	C	A	A	C	G	G	C	C	C	A	C
3R	+	3R+4878202	FBti0025172	EPgy2	TGCTCCGC	ATATGCTCCGCTAT		A	T	A	T	G	C	T	C	C	G	C	T	A	T
3R	+	3R+4883040	FBti0027075	EPgy2	GGAAATAC	ATGGGAAATACTCA		A	T	G	G	G	A	A	A	T	A	C	T	C	A
3R	+	3R+4925911	FBti0027189	EPgy2	GTTTGTGT	CGAGTTTGTGTATG		C	G	A	G	T	T	T	G	T	G	T	A	T	G
3R	+	3R+5065729	FBti0038712	EPgy2	TTCATGGA	CACTTCATGGATAC		C	A	C	T	T	C	A	T	G	G	A	T	A	C
3R	+	3R+5084698	FBti0027370	EPgy2	ATTCGGCT	TCAATTCGGCTGGT		T	C	A	A	T	T	C	G	G	C	T	G	G	T
3R	+	3R+5086366	FBti0027238	EPgy2	GAGGCTGC	GATGAGGCTGCAAG		G	A	T	G	A	G	G	C	T	G	C	A	A	G
3R	+	3R+5287291	FBti0040289	EPgy2	ACTGCAAC	TTAACTGCAACCGG		T	T	A	A	C	T	G	C	A	A	C	C	G	G
3R	+	3R+5338502	FBti0039463	EPgy2	CCCCACAC	AAGCCCCACACATT		A	A	G	C	C	C	C	A	C	A	C	A	T	T
3R	+	3R+5377493	FBti0057786	EPgy2	GGCTTATG	ATGGGCTTATGGTT		A	T	G	G	G	C	T	T	A	T	G	G	T	T
3R	+	3R+5385614	FBti0027327	EPgy2	GAGATTTA	TGGGAGATTTATTA		T	G	G	G	A	G	A	T	T	T	A	T	T	A
3R	+	3R+5418777	FBti0076063	EPgy2	TTACTGAC	CGCTTACTGACTTT		C	G	C	T	T	A	C	T	G	A	C	T	T	T
3R	+	3R+5536882	FBti0027309	EPgy2	ATCCACAG	ATAATCCACAGTCT		A	T	A	A	T	C	C	A	C	A	G	T	C	T
3R	+	3R+5566635	FBti0033368	EPgy2	GTCTTACC	GACGTCTTACCCAT		G	A	C	G	T	C	T	T	A	C	C	C	A	T
3R	+	3R+5573823	FBti0027182	EPgy2	GCTGGCCA	TCGGCTGGCCATTA		T	C	G	G	C	T	G	G	C	C	A	T	T	A
3R	+	3R+5581912	FBti0039473	EPgy2	CAGCAGTC	ATTCAGCAGTCCAA		A	T	T	C	A	G	C	A	G	T	C	C	A	A
3R	+	3R+5588671	FBti0039016	EPgy2	AGCTGTGC	CTCAGCTGTGCTCA		C	T	C	A	G	C	T	G	T	G	C	T	C	A
3R	+	3R+5594178	FBti0039215	EPgy2	GGCTGGGG	TGGGGCTGGGGGCT		T	G	G	G	G	C	T	G	G	G	G	G	C	T
3R	+	3R+5610610	FBti0039150	EPgy2	GAGCAGCC	ATGGAGCAGCCGAA		A	T	G	G	A	G	C	A	G	C	C	G	A	A
3R	+	3R+5868619	FBti0038923	EPgy2	TCCCCACC	TTCTCCCCACCAAT		T	T	C	T	C	C	C	C	A	C	C	A	A	T
3R	+	3R+5970393	FBti0040215	EPgy2	CTGGGGAC	ATGCTGGGGACCGT		A	T	G	C	T	G	G	G	G	A	C	C	G	T
3R	+	3R+6015388	FBti0038683	EPgy2	GCCGGGAC	CACGCCGGGACTCA		C	A	C	G	C	C	G	G	G	A	C	T	C	A
3R	+	3R+6095042	FBti0076059	EPgy2	GCCTGTTC	ATCGCCTGTTCCAC		A	T	C	G	C	C	T	G	T	T	C	C	A	C
3R	+	3R+6177805	FBti0040133	EPgy2	GGAGAGAC	GTGGGAGAGACGGA		G	T	G	G	G	A	G	A	G	A	C	G	G	A
3R	+	3R+6586731	FBti0038978	EPgy2	GACGGGTT	AAAGACGGGTTCAA		A	A	A	G	A	C	G	G	G	T	T	C	A	A
3R	+	3R+6680506	FBti0058008	EPgy2	GGCACGTC	CGTGGCACGTCGAC		C	G	T	G	G	C	A	C	G	T	C	G	A	C
3R	+	3R+6683642	FBti0025263	EPgy2	GCACATAC	CGGGCACATACTAA		C	G	G	G	C	A	C	A	T	A	C	T	A	A
3R	+	3R+6702084	FBti0024865	EPgy2	GCGAGAAG	ACTGCGAGAAGAGT		A	C	T	G	C	G	A	G	A	A	G	A	G	T
3R	+	3R+6715009	FBti0076139	EPgy2	GATAGGCG	TCCGATAGGCGGAG		T	C	C	G	A	T	A	G	G	C	G	G	A	G
3R	+	3R+6981551	FBti0038976	EPgy2	GTGCACAC	TTAGTGCACACCCG		T	T	A	G	T	G	C	A	C	A	C	C	C	G
3R	+	3R+6982675	FBti0040151	EPgy2	CTCCACAG	TGACTCCACAGTGT		T	G	A	C	T	C	C	A	C	A	G	T	G	T
3R	+	3R+6998494	FBti0027158	EPgy2	GTCTTCGG	TCAGTCTTCGGTCT		T	C	A	G	T	C	T	T	C	G	G	T	C	T
3R	+	3R+7107464	FBti0027330	EPgy2	ATTCGCCT	ATTATTCGCCTTGA		A	T	T	A	T	T	C	G	C	C	T	T	G	A
3R	+	3R+7146791	FBti0039221	EPgy2	GTGAGAGC	AGTGTGAGAGCCAA		A	G	T	G	T	G	A	G	A	G	C	C	A	A
3R	+	3R+7245272	FBti0075927	EPgy2	GTTCGGTC	TCAGTTCGGTCAGT		T	C	A	G	T	T	C	G	G	T	C	A	G	T
3R	+	3R+7383590	FBti0075900	EPgy2	GCCCAGGG	CCGGCCCAGGGTTT		C	C	G	G	C	C	C	A	G	G	G	T	T	T
3R	+	3R+7392638	FBti0027149	EPgy2	ATTAGGAG	ACAATTAGGAGGAA		A	C	A	A	T	T	A	G	G	A	G	G	A	A
3R	+	3R+7449109	FBti0076089	EPgy2	TCTGGCGT	CCGTCTGGCGTAAA		C	C	G	T	C	T	G	G	C	G	T	A	A	A
3R	+	3R+7454062	FBti0025147	EPgy2	GGCTTGCC	GCCGGCTTGCCCGT		G	C	C	G	G	C	T	T	G	C	C	C	G	T
3R	+	3R+7590173	FBti0057882	EPgy2	ATTCGATC	TTTATTCGATCAGC		T	T	T	A	T	T	C	G	A	T	C	A	G	C
3R	+	3R+7604114	FBti0100345	EPgy2	GTGCGAGG	TCCGTGCGAGGTAA		T	C	C	G	T	G	C	G	A	G	G	T	A	A
3R	+	3R+7682259	FBti0027045	EPgy2	GGCTGACC	CAGGGCTGACCACC		C	A	G	G	G	C	T	G	A	C	C	A	C	C
3R	+	3R+7694585	FBti0027042	EPgy2	CGCCACCT	ACGCGCCACCTCTT		A	C	G	C	G	C	C	A	C	C	T	C	T	T
3R	+	3R+7782338	FBti0027394	EPgy2	GTTCGTAG	CAGGTTCGTAGGCT		C	A	G	G	T	T	C	G	T	A	G	G	C	T
3R	+	3R+7784116	FBti0025170	EPgy2	CTCTGGAT	ATTCTCTGGATAAC		A	T	T	C	T	C	T	G	G	A	T	A	A	C
3R	+	3R+7793171	FBti0027188	EPgy2	GCCGCTAA	TTAGCCGCTAAATA		T	T	A	G	C	C	G	C	T	A	A	A	T	A
3R	+	3R+7836500	FBti0039160	EPgy2	GCTCAGAT	AACGCTCAGATCTT		A	A	C	G	C	T	C	A	G	A	T	C	T	T
3R	+	3R+7891313	FBti0033130	EPgy2	GTTCCCAG	AAGGTTCCCAGTTG		A	A	G	G	T	T	C	C	C	A	G	T	T	G
3R	+	3R+8195291	FBti0024927	EPgy2	AGTCGGCA	AAGAGTCGGCATAC		A	A	G	A	G	T	C	G	G	C	A	T	A	C
3R	+	3R+8251995	FBti0039207	EPgy2	GTCTAAGC	GAAGTCTAAGCCAA		G	A	A	G	T	C	T	A	A	G	C	C	A	A
3R	+	3R+8256768	FBti0040015	EPgy2	TTCGGGCT	AATTTCGGGCTTAT		A	A	T	T	T	C	G	G	G	C	T	T	A	T
3R	+	3R+8269738	FBti0040074	EPgy2	CGCTAATG	AACCGCTAATGCGA		A	A	C	C	G	C	T	A	A	T	G	C	G	A
3R	+	3R+8454127	FBti0039252	EPgy2	TATGGATC	GACTATGGATCCGA		G	A	C	T	A	T	G	G	A	T	C	C	G	A
3R	+	3R+8523601	FBti0024916	EPgy2	CGTTAGCC	AACCGTTAGCCGAA		A	A	C	C	G	T	T	A	G	C	C	G	A	A
3R	+	3R+8545777	FBti0038093	EPgy2	GTTCTAAC	AATGTTCTAACTAT		A	A	T	G	T	T	C	T	A	A	C	T	A	T
3R	+	3R+8548826	FBti0038092	EPgy2	GGTTTCCA	TTGGGTTTCCACCA		T	T	G	G	G	T	T	T	C	C	A	C	C	A
3R	+	3R+8565294	FBti0075969	EPgy2	TTCCCAAC	AAATTCCCAACTCG		A	A	A	T	T	C	C	C	A	A	C	T	C	G
3R	+	3R+8787419	FBti0039474	EPgy2	CACATACA	AAACACATACACAT		A	A	A	C	A	C	A	T	A	C	A	C	A	T
3R	+	3R+8837390	FBti0039916	EPgy2	GTTTGTTC	GTCGTTTGTTCTAA		G	T	C	G	T	T	T	G	T	T	C	T	A	A
3R	+	3R+9276099	FBti0039556	EPgy2	ATTCACGC	TCAATTCACGCCAA		T	C	A	A	T	T	C	A	C	G	C	C	A	A
3R	+	3R+9359559	FBti0075874	EPgy2	CCACCAGC	CCACCACCAGCAGT		C	C	A	C	C	A	C	C	A	G	C	A	G	T
3R	+	3R+9486976	FBti0039773	EPgy2	ATATGAGC	ATAATATGAGCTGC		A	T	A	A	T	A	T	G	A	G	C	T	G	C
3R	+	3R+9509695	FBti0039919	EPgy2	GGTTAGAC	ACCGGTTAGACGAG		A	C	C	G	G	T	T	A	G	A	C	G	A	G
3R	+	3R+9512533	FBti0027230	EPgy2	CATCCGCC	ACTCATCCGCCTGA		A	C	T	C	A	T	C	C	G	C	C	T	G	A
3R	+	3R+9537427	FBti0076002	EPgy2	GCACGGGC	TCTGCACGGGCGGG		T	C	T	G	C	A	C	G	G	G	C	G	G	G
3R	+	3R+9608034	FBti0040001	EPgy2	GCCGGCAT	TTAGCCGGCATCGA		T	T	A	G	C	C	G	G	C	A	T	C	G	A
3R	+	3R+9846599	FBti0033351	EPgy2	CTGTGAGC	ATGCTGTGAGCTAC		A	T	G	C	T	G	T	G	A	G	C	T	A	C
3R	+	3R+9876589	FBti0039557	EPgy2	GGCGAGAG	AACGGCGAGAGCGT		A	A	C	G	G	C	G	A	G	A	G	C	G	T
3R	+	3R+9882622	FBti0040209	EPgy2	GTCTGTCT	GTGGTCTGTCTCCG		G	T	G	G	T	C	T	G	T	C	T	C	C	G
3R	+	3R+9934170	FBti0025152	EPgy2	CCTTGAAC	AGACCTTGAACTTG		A	G	A	C	C	T	T	G	A	A	C	T	T	G
3R	+	3R+10417302	FBti0038765	EPgy2	GATTGCGA	TGCGATTGCGACTG		T	G	C	G	A	T	T	G	C	G	A	C	T	G
3R	+	3R+10451531	FBti0033352	EPgy2	ACTACGAC	ACGACTACGACTCT		A	C	G	A	C	T	A	C	G	A	C	T	C	T
3R	+	3R+10485176	FBti0057770	EPgy2	TGCTGGTG	ATGTGCTGGTGGAT		A	T	G	T	G	C	T	G	G	T	G	G	A	T
3R	+	3R+10554889	FBti0027336	EPgy2	GGCCATCC	GTTGGCCATCCCGC		G	T	T	G	G	C	C	A	T	C	C	C	G	C
3R	+	3R+10668873	FBti0038700	EPgy2	CTCCCAAC	TCTCTCCCAACCAT		T	C	T	C	T	C	C	C	A	A	C	C	A	T
3R	+	3R+10712124	FBti0039525	EPgy2	GGCCCCCA	AGGGGCCCCCAGTA		A	G	G	G	G	C	C	C	C	C	A	G	T	A
3R	+	3R+10715919	FBti0040167	EPgy2	GGTGGTGG	AAAGGTGGTGGTTT		A	A	A	G	G	T	G	G	T	G	G	T	T	T
3R	+	3R+10921367	FBti0024075	EPgy2	TCCGAAAA	AAGTCCGAAAACTG		A	A	G	T	C	C	G	A	A	A	A	C	T	G
3R	+	3R+10957664	FBti0039262	EPgy2	CGTATACG	ATACGTATACGTAT		A	T	A	C	G	T	A	T	A	C	G	T	A	T
3R	+	3R+10961764	FBti0075875	EPgy2	GGCTAAGC	ATGGGCTAAGCTTT		A	T	G	G	G	C	T	A	A	G	C	T	T	T
3R	+	3R+11022925	FBti0057608	EPgy2	CTGTGTGG	GTGCTGTGTGGGGC		G	T	G	C	T	G	T	G	T	G	G	G	G	C
3R	+	3R+11024212	FBti0057896	EPgy2	CTTACAGC	AACCTTACAGCATT		A	A	C	C	T	T	A	C	A	G	C	A	T	T
3R	+	3R+11044961	FBti0024869	EPgy2	ATCCGCCC	CTTATCCGCCCCTT		C	T	T	A	T	C	C	G	C	C	C	C	T	T
3R	+	3R+11067918	FBti0075843	EPgy2	GCTCGGTT	TCCGCTCGGTTGAC		T	C	C	G	C	T	C	G	G	T	T	G	A	C
3R	+	3R+11073018	FBti0076012	EPgy2	GGGTGGGT	TCGGGGTGGGTGTT		T	C	G	G	G	G	T	G	G	G	T	G	T	T
3R	+	3R+11089207	FBti0025255	EPgy2	ATCGGCGG	ATAATCGGCGGAAA		A	T	A	A	T	C	G	G	C	G	G	A	A	A
3R	+	3R+11089334	FBti0039615	EPgy2	GACAAGAT	ACAGACAAGATTTC		A	C	A	G	A	C	A	A	G	A	T	T	T	C
3R	+	3R+11116647	FBti0040274	EPgy2	AACCAGAG	TCAAACCAGAGATT		T	C	A	A	A	C	C	A	G	A	G	A	T	T
3R	+	3R+11156470	FBti0057622	EPgy2	GACTGGAA	TCCGACTGGAACTT		T	C	C	G	A	C	T	G	G	A	A	C	T	T
3R	+	3R+11158914	FBti0039210	EPgy2	ACAGAGAC	ACAACAGAGACCAA		A	C	A	A	C	A	G	A	G	A	C	C	A	A
3R	+	3R+11159051	FBti0039350	EPgy2	TCCGCGGC	TTATCCGCGGCCTT		T	T	A	T	C	C	G	C	G	G	C	C	T	T
3R	+	3R+11171822	FBti0057758	EPgy2	GACGCGCG	TAAGACGCGCGGAA		T	A	A	G	A	C	G	C	G	C	G	G	A	A
3R	+	3R+11595085	FBti0040257	EPgy2	AGCCGGTT	TTCAGCCGGTTGTT		T	T	C	A	G	C	C	G	G	T	T	G	T	T
3R	+	3R+11619075	FBti0027611	EPgy2	CGCCGGCC	AAACGCCGGCCCGT		A	A	A	C	G	C	C	G	G	C	C	C	G	T
3R	+	3R+11619474	FBti0039738	EPgy2	CTCCCGTC	GGACTCCCGTCAAA		G	G	A	C	T	C	C	C	G	T	C	A	A	A
3R	+	3R+11629958	FBti0039687	EPgy2	GTTATGTG	ATCGTTATGTGGAT		A	T	C	G	T	T	A	T	G	T	G	G	A	T
3R	+	3R+11876800	FBti0027399	EPgy2	CGCCAGTC	ATACGCCAGTCGAT		A	T	A	C	G	C	C	A	G	T	C	G	A	T
3R	+	3R+11925279	FBti0039906	EPgy2	TGCTAAAC	TGTTGCTAAACTTT		T	G	T	T	G	C	T	A	A	A	C	T	T	T
3R	+	3R+11972484	FBti0057683	EPgy2	GTCGGAGG	TCAGTCGGAGGTGA		T	C	A	G	T	C	G	G	A	G	G	T	G	A
3R	+	3R+12012745	FBti0033373	EPgy2	AACTGAAC	CTGAACTGAACTAA		C	T	G	A	A	C	T	G	A	A	C	T	A	A
3R	+	3R+12049248	FBti0025250	EPgy2	GGTGCCAC	GTTGGTGCCACACG		G	T	T	G	G	T	G	C	C	A	C	A	C	G
3R	+	3R+12051740	FBti0024903	EPgy2	TGTGGGAC	ATTTGTGGGACCTT		A	T	T	T	G	T	G	G	G	A	C	C	T	T
3R	+	3R+12073087	FBti0025227	EPgy2	GCTTGGCT	ATCGCTTGGCTTGG		A	T	C	G	C	T	T	G	G	C	T	T	G	G
3R	+	3R+12079567	FBti0027256	EPgy2	GCTCGGAC	ATTGCTCGGACGGC		A	T	T	G	C	T	C	G	G	A	C	G	G	C
3R	+	3R+12098729	FBti0039733	EPgy2	GTCCACAC	TTAGTCCACACTAC		T	T	A	G	T	C	C	A	C	A	C	T	A	C
3R	+	3R+12175141	FBti0075887	EPgy2	TGCGGGCG	ATCTGCGGGCGCTT		A	T	C	T	G	C	G	G	G	C	G	C	T	T
3R	+	3R+12281772	FBti0040164	EPgy2	ACTTGGCT	TTCACTTGGCTGTT		T	T	C	A	C	T	T	G	G	C	T	G	T	T
3R	+	3R+12328189	FBti0038979	EPgy2	ACGCAAAC	ATGACGCAAACAAA		A	T	G	A	C	G	C	A	A	A	C	A	A	A
3R	+	3R+12440078	FBti0039257	EPgy2	CCTGTCAC	GTACCTGTCACGAT		G	T	A	C	C	T	G	T	C	A	C	G	A	T
3R	+	3R+12450981	FBti0039867	EPgy2	CGCGAGTC	AGACGCGAGTCGAA		A	G	A	C	G	C	G	A	G	T	C	G	A	A
3R	+	3R+12465982	FBti0039282	EPgy2	CCTGCGGG	AAACCTGCGGGCAT		A	A	A	C	C	T	G	C	G	G	G	C	A	T
3R	+	3R+12866268	FBti0027372	EPgy2	GTTGGGAG	GTTGTTGGGAGAGA		G	T	T	G	T	T	G	G	G	A	G	A	G	A
3R	+	3R+12866398	FBti0039622	EPgy2	GGTGGCGG	AATGGTGGCGGGTT		A	A	T	G	G	T	G	G	C	G	G	G	T	T
3R	+	3R+12869306	FBti0039819	EPgy2	ATTCCGAT	GTTATTCCGATAGT		G	T	T	A	T	T	C	C	G	A	T	A	G	T
3R	+	3R+12880492	FBti0025157	EPgy2	CCCCCACC	ATGCCCCCACCGTC		A	T	G	C	C	C	C	C	A	C	C	G	T	C
3R	+	3R+12969142	FBti0025245	EPgy2	GAGCACAC	CACGAGCACACGAT		C	A	C	G	A	G	C	A	C	A	C	G	A	T
3R	+	3R+13205644	FBti0039122	EPgy2	CAGTGCAT	TCGCAGTGCATCAA		T	C	G	C	A	G	T	G	C	A	T	C	A	A
3R	+	3R+13220406	FBti0039302	EPgy2	ATCTGGTA	TGCATCTGGTAATC		T	G	C	A	T	C	T	G	G	T	A	A	T	C
3R	+	3R+13432078	FBti0027148	EPgy2	GTTTCGGT	TGGGTTTCGGTCGT		T	G	G	G	T	T	T	C	G	G	T	C	G	T
3R	+	3R+13492284	FBti0057930	EPgy2	TTTCCGCT	GTGTTTCCGCTTTC		G	T	G	T	T	T	C	C	G	C	T	T	T	C
3R	+	3R+13508123	FBti0027207	EPgy2	CTACATGC	TCACTACATGCGTT		T	C	A	C	T	A	C	A	T	G	C	G	T	T
3R	+	3R+13544036	FBti0039604	EPgy2	ATCATTAG	TCAATCATTAGGGA		T	C	A	A	T	C	A	T	T	A	G	G	G	A
3R	+	3R+13545179	FBti0027192	EPgy2	CCACCACT	CCACCACCACTGAA		C	C	A	C	C	A	C	C	A	C	T	G	A	A
3R	+	3R+13628668	FBti0039259	EPgy2	CCGGGCAA	AAGCCGGGCAACGA		A	A	G	C	C	G	G	G	C	A	A	C	G	A
3R	+	3R+13631916	FBti0039602	EPgy2	CCACCGCC	ATCCCACCGCCAAC		A	T	C	C	C	A	C	C	G	C	C	A	A	C
3R	+	3R+13637260	FBti0039456	EPgy2	CTTCCACC	AGGCTTCCACCACA		A	G	G	C	T	T	C	C	A	C	C	A	C	A
3R	+	3R+13710797	FBti0039226	EPgy2	GTTTAGCT	TCAGTTTAGCTAGA		T	C	A	G	T	T	T	A	G	C	T	A	G	A
3R	+	3R+14025990	FBti0075442	EPgy2	GACACACC	ACAGACACACCATT		A	C	A	G	A	C	A	C	A	C	C	A	T	T
3R	+	3R+14052087	FBti0025229	EPgy2	AGACACAC	CACAGACACACCAT		C	A	C	A	G	A	C	A	C	A	C	C	A	T
3R	+	3R+14058213	FBti0027039	EPgy2	GGACGGCC	AGTGGACGGCCTTT		A	G	T	G	G	A	C	G	G	C	C	T	T	T
3R	+	3R+14100867	FBti0039202	EPgy2	GGTGGTGG	AAAGGTGGTGGCTG		A	A	A	G	G	T	G	G	T	G	G	C	T	G
3R	+	3R+14224969	FBti0057598	EPgy2	GCGCATAG	TTTGCGCATAGAGA		T	T	T	G	C	G	C	A	T	A	G	A	G	A
3R	+	3R+14238589	FBti0040290	EPgy2	TTCGGGCT	TCATTCGGGCTCGT		T	C	A	T	T	C	G	G	G	C	T	C	G	T
3R	+	3R+14306601	FBti0027133	EPgy2	GTGTGTGC	AGAGTGTGTGCGTT		A	G	A	G	T	G	T	G	T	G	C	G	T	T
3R	+	3R+14398848	FBti0039722	EPgy2	CTTGCGCC	GTGCTTGCGCCTAA		G	T	G	C	T	T	G	C	G	C	C	T	A	A
3R	+	3R+14496695	FBti0024100	EPgy2	CTCAGAAC	GTGCTCAGAACATG		G	T	G	C	T	C	A	G	A	A	C	A	T	G
3R	+	3R+14506259	FBti0038751	EPgy2	CTCCGGCG	GAGCTCCGGCGCAA		G	A	G	C	T	C	C	G	G	C	G	C	A	A
3R	+	3R+14859268	FBti0038823	EPgy2	GCAATGGC	GAAGCAATGGCCGT		G	A	A	G	C	A	A	T	G	G	C	C	G	T
3R	+	3R+14920515	FBti0039290	EPgy2	TGTTGTAC	TATTGTTGTACATG		T	A	T	T	G	T	T	G	T	A	C	A	T	G
3R	+	3R+14982967	FBti0033095	EPgy2	CCGTGGAC	CCGCCGTGGACTGA		C	C	G	C	C	G	T	G	G	A	C	T	G	A
3R	+	3R+14983801	FBti0040017	EPgy2	GGCCACCC	AGTGGCCACCCACT		A	G	T	G	G	C	C	A	C	C	C	A	C	T
3R	+	3R+15006346	FBti0040197	EPgy2	GTTTCGGG	TCGGTTTCGGGGAG		T	C	G	G	T	T	T	C	G	G	G	G	A	G
3R	+	3R+15289210	FBti0038864	EPgy2	ATGGAACC	ACAATGGAACCCTT		A	C	A	A	T	G	G	A	A	C	C	C	T	T
3R	+	3R+15716585	FBti0024093	EPgy2	GACTGGGC	TTGGACTGGGCGAA		T	T	G	G	A	C	T	G	G	G	C	G	A	A
3R	+	3R+15834227	FBti0039589	EPgy2	AGTCACTC	AGCAGTCACTCTTC		A	G	C	A	G	T	C	A	C	T	C	T	T	C
3R	+	3R+15847067	FBti0025178	EPgy2	GGCTACGC	TTCGGCTACGCCCA		T	T	C	G	G	C	T	A	C	G	C	C	C	A
3R	+	3R+16405512	FBti0027281	EPgy2	CCCACGCC	TCACCCACGCCTTT		T	C	A	C	C	C	A	C	G	C	C	T	T	T
3R	+	3R+16419040	FBti0039833	EPgy2	ATATAACC	CATATATAACCAAT		C	A	T	A	T	A	T	A	A	C	C	A	A	T
3R	+	3R+16448345	FBti0027245	EPgy2	GTCAATTA	TTAGTCAATTACTA		T	T	A	G	T	C	A	A	T	T	A	C	T	A
3R	+	3R+16644726	FBti0039593	EPgy2	GTCAGAGT	AGCGTCAGAGTGTT		A	G	C	G	T	C	A	G	A	G	T	G	T	T
3R	+	3R+16647887	FBti0039240	EPgy2	ACTTCAAG	AATACTTCAAGTGT		A	A	T	A	C	T	T	C	A	A	G	T	G	T
3R	+	3R+16672050	FBti0057873	EPgy2	AGCAACAG	AGAAGCAACAGACA		A	G	A	A	G	C	A	A	C	A	G	A	C	A
3R	+	3R+16783418	FBti0039672	EPgy2	GTGGCGGC	CTTGTGGCGGCTAA		C	T	T	G	T	G	G	C	G	G	C	T	A	A
3R	+	3R+16803868	FBti0027260	EPgy2	CTGGCACC	TCACTGGCACCTAA		T	C	A	C	T	G	G	C	A	C	C	T	A	A
3R	+	3R+16887510	FBti0075879	EPgy2	TCCACAGC	TCCTCCACAGCGGC		T	C	C	T	C	C	A	C	A	G	C	G	G	C
3R	+	3R+16890849	FBti0039515	EPgy2	GGCCGTCA	AGGGGCCGTCACTA		A	G	G	G	G	C	C	G	T	C	A	C	T	A
3R	+	3R+16920253	FBti0033372	EPgy2	GTCATACG	ATCGTCATACGATT		A	T	C	G	T	C	A	T	A	C	G	A	T	T
3R	+	3R+16927443	FBti0100360	EPgy2	GATAAGGC	TTTGATAAGGCCAC		T	T	T	G	A	T	A	A	G	G	C	C	A	C
3R	+	3R+16966472	FBti0039400	EPgy2	ACCCACCC	TTAACCCACCCCAA		T	T	A	A	C	C	C	A	C	C	C	C	A	A
3R	+	3R+17049281	FBti0057883	EPgy2	AATTGAAC	GGTAATTGAACTCT		G	G	T	A	A	T	T	G	A	A	C	T	C	T
3R	+	3R+17419831	FBti0039585	EPgy2	CGGCAGAC	ATGCGGCAGACTGG		A	T	G	C	G	G	C	A	G	A	C	T	G	G
3R	+	3R+17439022	FBti0027292	EPgy2	GCCTGGTC	TTCGCCTGGTCAAC		T	T	C	G	C	C	T	G	G	T	C	A	A	C
3R	+	3R+17452259	FBti0057905	EPgy2	CACAAAAG	TACCACAAAAGAGA		T	A	C	C	A	C	A	A	A	A	G	A	G	A
3R	+	3R+17655432	FBti0039304	EPgy2	TGCCAGCT	AAATGCCAGCTATT		A	A	A	T	G	C	C	A	G	C	T	A	T	T
3R	+	3R+17681990	FBti0038872	EPgy2	GCTGGTGG	AATGCTGGTGGCGA		A	A	T	G	C	T	G	G	T	G	G	C	G	A
3R	+	3R+17697776	FBti0100373	EPgy2	CGACGGCC	TTACGACGGCCGAT		T	T	A	C	G	A	C	G	G	C	C	G	A	T
3R	+	3R+17844928	FBti0024847	EPgy2	GCGCCGCT	GCTGCGCCGCTGAT		G	C	T	G	C	G	C	C	G	C	T	G	A	T
3R	+	3R+17860222	FBti0057879	EPgy2	CACAAGAG	TCACACAAGAGCAT		T	C	A	C	A	C	A	A	G	A	G	C	A	T
3R	+	3R+17860943	FBti0057605	EPgy2	GCTCCCCC	ACAGCTCCCCCAAC		A	C	A	G	C	T	C	C	C	C	C	A	A	C
3R	+	3R+17868550	FBti0039781	EPgy2	AGCTAAGG	AAAAGCTAAGGCAA		A	A	A	A	G	C	T	A	A	G	G	C	A	A
3R	+	3R+17959451	FBti0039856	EPgy2	GGCCAGTT	TTAGGCCAGTTCCT		T	T	A	G	G	C	C	A	G	T	T	C	C	T
3R	+	3R+18201639	FBti0038916	EPgy2	TAAAATGA	ATGTAAAATGACTA		A	T	G	T	A	A	A	A	T	G	A	C	T	A
3R	+	3R+18273835	FBti0033314	EPgy2	CGCTCGAC	CAACGCTCGACCAT		C	A	A	C	G	C	T	C	G	A	C	C	A	T
3R	+	3R+18357700	FBti0057923	EPgy2	AGCGAGAG	AGCAGCGAGAGCGT		A	G	C	A	G	C	G	A	G	A	G	C	G	T
3R	+	3R+18404944	FBti0025164	EPgy2	GTTTACAG	ACAGTTTACAGTGC		A	C	A	G	T	T	T	A	C	A	G	T	G	C
3R	+	3R+18452647	FBti0039927	EPgy2	GTATATCC	AAAGTATATCCAAT		A	A	A	G	T	A	T	A	T	C	C	A	A	T
3R	+	3R+18546833	FBti0075987	EPgy2	CGCTACGC	TCTCGCTACGCCGC		T	C	T	C	G	C	T	A	C	G	C	C	G	C
3R	+	3R+18552078	FBti0039256	EPgy2	GCTGAACA	AGAGCTGAACAAAA		A	G	A	G	C	T	G	A	A	C	A	A	A	A
3R	+	3R+18576514	FBti0024844	EPgy2	GTGCGACT	AGCGTGCGACTGGC		A	G	C	G	T	G	C	G	A	C	T	G	G	C
3R	+	3R+18724852	FBti0057698	EPgy2	ACCGGGAA	ATCACCGGGAACAG		A	T	C	A	C	C	G	G	G	A	A	C	A	G
3R	+	3R+18878249	FBti0038904	EPgy2	GCACAGAC	GTAGCACAGACTCT		G	T	A	G	C	A	C	A	G	A	C	T	C	T
3R	+	3R+18879426	FBti0057881	EPgy2	CTCTGAGC	AGACTCTGAGCTTT		A	G	A	C	T	C	T	G	A	G	C	T	T	T
3R	+	3R+18943846	FBti0039115	EPgy2	AAGCCCAA	GCGAAGCCCAACTT		G	C	G	A	A	G	C	C	C	A	A	C	T	T
3R	+	3R+18944048	FBti0038879	EPgy2	GCCCACGC	ACCGCCCACGCCCA		A	C	C	G	C	C	C	A	C	G	C	C	C	A
3R	+	3R+19074855	FBti0038811	EPgy2	ATCCCGTC	AGCATCCCGTCGTG		A	G	C	A	T	C	C	C	G	T	C	G	T	G
3R	+	3R+19106623	FBti0057724	EPgy2	CGTACGTC	ATACGTACGTCATT		A	T	A	C	G	T	A	C	G	T	C	A	T	T
3R	+	3R+19200039	FBti0039249	EPgy2	ATGTGTGC	AATATGTGTGCCAA		A	A	T	A	T	G	T	G	T	G	C	C	A	A
3R	+	3R+19559021	FBti0027214	EPgy2	CAACAGCT	TTTCAACAGCTGCA		T	T	T	C	A	A	C	A	G	C	T	G	C	A
3R	+	3R+19565731	FBti0039200	EPgy2	GGCCGACA	CTTGGCCGACACCA		C	T	T	G	G	C	C	G	A	C	A	C	C	A
3R	+	3R+19607454	FBti0075881	EPgy2	ATTCGATC	GCCATTCGATCAGC		G	C	C	A	T	T	C	G	A	T	C	A	G	C
3R	+	3R+19607533	FBti0025198	EPgy2	GCGCAATG	AAGGCGCAATGTGT		A	A	G	G	C	G	C	A	A	T	G	T	G	T
3R	+	3R+19644962	FBti0038968	EPgy2	GAGCTGGC	AATGAGCTGGCTTT		A	A	T	G	A	G	C	T	G	G	C	T	T	T
3R	+	3R+19716797	FBti0025261	EPgy2	GGATATGC	TATGGATATGCTAA		T	A	T	G	G	A	T	A	T	G	C	T	A	A
3R	+	3R+19748790	FBti0025274	EPgy2	ACACAGCC	AGTACACAGCCGTT		A	G	T	A	C	A	C	A	G	C	C	G	T	T
3R	+	3R+19759297	FBti0024092	EPgy2	ACCTCCAC	AGTACCTCCACCAT		A	G	T	A	C	C	T	C	C	A	C	C	A	T
3R	+	3R+19812249	FBti0025216	EPgy2	ATCTTGAC	CCCATCTTGACACT		C	C	C	A	T	C	T	T	G	A	C	A	C	T
3R	+	3R+19863952	FBti0057661	EPgy2	CTTTGACC	ACCCTTTGACCCCT		A	C	C	C	T	T	T	G	A	C	C	C	C	T
3R	+	3R+19873107	FBti0039703	EPgy2	GTCTAGAC	TCGGTCTAGACGAG		T	C	G	G	T	C	T	A	G	A	C	G	A	G
3R	+	3R+19877371	FBti0027593	EPgy2	TCCAGAAG	ATATCCAGAAGACT		A	T	A	T	C	C	A	G	A	A	G	A	C	T
3R	+	3R+19883106	FBti0024069	EPgy2	CTCTGGGC	CCTCTCTGGGCTCT		C	C	T	C	T	C	T	G	G	G	C	T	C	T
3R	+	3R+19978248	FBti0038754	EPgy2	ATTCAATC	CTTATTCAATCTTA		C	T	T	A	T	T	C	A	A	T	C	T	T	A
3R	+	3R+19998309	FBti0039381	EPgy2	CTTGGGTT	AAACTTGGGTTGCC		A	A	A	C	T	T	G	G	G	T	T	G	C	C
3R	+	3R+20019148	FBti0027103	EPgy2	GACTGTGG	AGGGACTGTGGTCA		A	G	G	G	A	C	T	G	T	G	G	T	C	A
3R	+	3R+20056630	FBti0025223	EPgy2	TGTCGGAG	ATCTGTCGGAGTGA		A	T	C	T	G	T	C	G	G	A	G	T	G	A
3R	+	3R+20060123	FBti0033242	EPgy2	GATCTGCC	GCGGATCTGCCCTT		G	C	G	G	A	T	C	T	G	C	C	C	T	T
3R	+	3R+20060666	FBti0038803	EPgy2	TTGTAGGT	TTGTTGTAGGTGTT		T	T	G	T	T	G	T	A	G	G	T	G	T	T
3R	+	3R+20075186	FBti0038922	EPgy2	GGTCCTGG	ATAGGTCCTGGTTT		A	T	A	G	G	T	C	C	T	G	G	T	T	T
3R	+	3R+20109484	FBti0058033	EPgy2	AACTGAAC	TTGAACTGAACTGA		T	T	G	A	A	C	T	G	A	A	C	T	G	A
3R	+	3R+20121644	FBti0038739	EPgy2	AGCAGGAG	GGGAGCAGGAGCAT		G	G	G	A	G	C	A	G	G	A	G	C	A	T
3R	+	3R+20340826	FBti0039189	EPgy2	CTCTGACA	CAGCTCTGACACAT		C	A	G	C	T	C	T	G	A	C	A	C	A	T
3R	+	3R+20344041	FBti0057817	EPgy2	GCTGCTGC	GCTGCTGCTGCTGT		G	C	T	G	C	T	G	C	T	G	C	T	G	T
3R	+	3R+20398192	FBti0024857	EPgy2	TGCTGGAT	TCGTGCTGGATTTT		T	C	G	T	G	C	T	G	G	A	T	T	T	T
3R	+	3R+20451237	FBti0038796	EPgy2	GTGCCCCC	AATGTGCCCCCCAA		A	A	T	G	T	G	C	C	C	C	C	C	A	A
3R	+	3R+20451877	FBti0038781	EPgy2	GCGCATGC	AAGGCGCATGCGAT		A	A	G	G	C	G	C	A	T	G	C	G	A	T
3R	+	3R+20480910	FBti0057680	EPgy2	ACTAAGCC	CTTACTAAGCCTAT		C	T	T	A	C	T	A	A	G	C	C	T	A	T
3R	+	3R+20545755	FBti0040008	EPgy2	CATATACC	ACGCATATACCTGA		A	C	G	C	A	T	A	T	A	C	C	T	G	A
3R	+	3R+20579567	FBti0039481	EPgy2	ATATAAGC	TGTATATAAGCCTA		T	G	T	A	T	A	T	A	A	G	C	C	T	A
3R	+	3R+20625313	FBti0038868	EPgy2	CAGCAGAG	AAACAGCAGAGTGA		A	A	A	C	A	G	C	A	G	A	G	T	G	A
3R	+	3R+20642665	FBti0057748	EPgy2	GTCTCGCA	AATGTCTCGCAGTT		A	A	T	G	T	C	T	C	G	C	A	G	T	T
3R	+	3R+20677358	FBti0033361	EPgy2	CCTTCGAC	TCGCCTTCGACTGG		T	C	G	C	C	T	T	C	G	A	C	T	G	G
3R	+	3R+20770696	FBti0024095	EPgy2	ATGCATAC	CGTATGCATACTAT		C	G	T	A	T	G	C	A	T	A	C	T	A	T
3R	+	3R+21070531	FBti0033302	EPgy2	GTCCAAGT	AGAGTCCAAGTCCA		A	G	A	G	T	C	C	A	A	G	T	C	C	A
3R	+	3R+21070790	FBti0039923	EPgy2	CTGCAGAC	AAGCTGCAGACATA		A	A	G	C	T	G	C	A	G	A	C	A	T	A
3R	+	3R+21118832	FBti0039503	EPgy2	TGCTAGAC	TTTTGCTAGACCCA		T	T	T	T	G	C	T	A	G	A	C	C	C	A
3R	+	3R+21129819	FBti0039635	EPgy2	AACCGAAC	AAGAACCGAACCAA		A	A	G	A	A	C	C	G	A	A	C	C	A	A
3R	+	3R+21158162	FBti0040118	EPgy2	CTCACGAG	TGACTCACGAGCTA		T	G	A	C	T	C	A	C	G	A	G	C	T	A
3R	+	3R+21317222	FBti0039648	EPgy2	ACACACAG	GGGACACACAGTTG		G	G	G	A	C	A	C	A	C	A	G	T	T	G
3R	+	3R+21420247	FBti0039740	EPgy2	GATGCGAC	AGGGATGCGACCGA		A	G	G	G	A	T	G	C	G	A	C	C	G	A
3R	+	3R+21463571	FBti0039379	EPgy2	ACTAACTG	ATCACTAACTGACC		A	T	C	A	C	T	A	A	C	T	G	A	C	C
3R	+	3R+21506249	FBti0057866	EPgy2	CCCATGAC	ATTCCCATGACCAA		A	T	T	C	C	C	A	T	G	A	C	C	A	A
3R	+	3R+21586149	FBti0057980	EPgy2	GCTTAGCG	ATTGCTTAGCGTTT		A	T	T	G	C	T	T	A	G	C	G	T	T	T
3R	+	3R+21624752	FBti0038760	EPgy2	ATGCAGCC	TTAATGCAGCCCGT		T	T	A	A	T	G	C	A	G	C	C	C	G	T
3R	+	3R+21823258	FBti0076060	EPgy2	GCATATGT	TATGCATATGTATT		T	A	T	G	C	A	T	A	T	G	T	A	T	T
3R	+	3R+22055837	FBti0040088	EPgy2	CCGCGACT	ATTCCGCGACTCAT		A	T	T	C	C	G	C	G	A	C	T	C	A	T
3R	+	3R+22085466	FBti0057835	EPgy2	GGTTGAGT	TCGGGTTGAGTCTC		T	C	G	G	G	T	T	G	A	G	T	C	T	C
3R	+	3R+22250041	FBti0057721	EPgy2	AGCCAGAC	GCAAGCCAGACTCA		G	C	A	A	G	C	C	A	G	A	C	T	C	A
3R	+	3R+22278289	FBti0057853	EPgy2	TTTCCACT	TGCTTTCCACTATC		T	G	C	T	T	T	C	C	A	C	T	A	T	C
3R	+	3R+22373998	FBti0039188	EPgy2	GGCTAGCG	AGTGGCTAGCGTAT		A	G	T	G	G	C	T	A	G	C	G	T	A	T
3R	+	3R+22692549	FBti0033233	EPgy2	CTTTGGGG	AAGCTTTGGGGGAT		A	A	G	C	T	T	T	G	G	G	G	G	A	T
3R	+	3R+22692657	FBti0027345	EPgy2	GGCTAATC	TGCGGCTAATCGAA		T	G	C	G	G	C	T	A	A	T	C	G	A	A
3R	+	3R+22712332	FBti0039430	EPgy2	GACCGCAT	AAAGACCGCATGAT		A	A	A	G	A	C	C	G	C	A	T	G	A	T
3R	+	3R+22755106	FBti0057647	EPgy2	CATCATGC	ATCCATCATGCACA		A	T	C	C	A	T	C	A	T	G	C	A	C	A
3R	+	3R+22779671	FBti0038693	EPgy2	GTAGGAAG	ATGGTAGGAAGGAA		A	T	G	G	T	A	G	G	A	A	G	G	A	A
3R	+	3R+22942492	FBti0076061	EPgy2	CCTCACTG	TATCCTCACTGGTC		T	A	T	C	C	T	C	A	C	T	G	G	T	C
3R	+	3R+22977378	FBti0040013	EPgy2	GGCCTGAC	AACGGCCTGACGAG		A	A	C	G	G	C	C	T	G	A	C	G	A	G
3R	+	3R+23407330	FBti0025134	EPgy2	GTTCGGCT	TGAGTTCGGCTGGC		T	G	A	G	T	T	C	G	G	C	T	G	G	C
3R	+	3R+23407993	FBti0033370	EPgy2	CCTCGACG	TTGCCTCGACGTGA		T	T	G	C	C	T	C	G	A	C	G	T	G	A
3R	+	3R+23419996	FBti0025135	EPgy2	CTGCAGAG	ATACTGCAGAGTAT		A	T	A	C	T	G	C	A	G	A	G	T	A	T
3R	+	3R+23468732	FBti0027180	EPgy2	GTCTGAAC	GCTGTCTGAACACA		G	C	T	G	T	C	T	G	A	A	C	A	C	A
3R	+	3R+23504955	FBti0027161	EPgy2	GGCTGGGG	AAGGGCTGGGGAAA		A	A	G	G	G	C	T	G	G	G	G	A	A	A
3R	+	3R+23525743	FBti0039025	EPgy2	GCCAGTAT	ATCGCCAGTATCAT		A	T	C	G	C	C	A	G	T	A	T	C	A	T
3R	+	3R+23750846	FBti0040000	EPgy2	GGCTGGAA	GTGGGCTGGAAGCG		G	T	G	G	G	C	T	G	G	A	A	G	C	G
3R	+	3R+23753937	FBti0100371	EPgy2	CGCCAGAC	ACACGCCAGACACT		A	C	A	C	G	C	C	A	G	A	C	A	C	T
3R	+	3R+23774435	FBti0039308	EPgy2	GTGCAGTC	GTGGTGCAGTCAGT		G	T	G	G	T	G	C	A	G	T	C	A	G	T
3R	+	3R+24162165	FBti0027328	EPgy2	CCACAGCT	TGCCCACAGCTAAA		T	G	C	C	C	A	C	A	G	C	T	A	A	A
3R	+	3R+24165441	FBti0076005	EPgy2	GTGTGGGC	AGAGTGTGGGCAGT		A	G	A	G	T	G	T	G	G	G	C	A	G	T
3R	+	3R+24165553	FBti0039364	EPgy2	GGCTGAAA	ATGGGCTGAAAGAT		A	T	G	G	G	C	T	G	A	A	A	G	A	T
3R	+	3R+24424762	FBti0040206	EPgy2	TATTGTAT	TGGTATTGTATGAT		T	G	G	T	A	T	T	G	T	A	T	G	A	T
3R	+	3R+24426164	FBti0024909	EPgy2	GGCCTTAT	TTGGGCCTTATCTT		T	T	G	G	G	C	C	T	T	A	T	C	T	T
3R	+	3R+24636757	FBti0039778	EPgy2	ATCACCCC	AGAATCACCCCCAG		A	G	A	A	T	C	A	C	C	C	C	C	A	G
3R	+	3R+24715258	FBti0040216	EPgy2	ATCCACAC	GAGATCCACACGAG		G	A	G	A	T	C	C	A	C	A	C	G	A	G
3R	+	3R+24717571	FBti0039951	EPgy2	ACTCAGCC	CAGACTCAGCCCTT		C	A	G	A	C	T	C	A	G	C	C	C	T	T
3R	+	3R+24852605	FBti0075939	EPgy2	GTTTGTAC	GCTGTTTGTACTTT		G	C	T	G	T	T	T	G	T	A	C	T	T	T
3R	+	3R+24853036	FBti0024072	EPgy2	GTTCGGCA	AGTGTTCGGCACCA		A	G	T	G	T	T	C	G	G	C	A	C	C	A
3R	+	3R+24887492	FBti0075983	EPgy2	AATGGGAC	ATGAATGGGACGAA		A	T	G	A	A	T	G	G	G	A	C	G	A	A
3R	+	3R+24890418	FBti0024113	EPgy2	GTCCAACG	AGTGTCCAACGTTT		A	G	T	G	T	C	C	A	A	C	G	T	T	T
3R	+	3R+24948591	FBti0076112	EPgy2	CGGCAAGC	TTGCGGCAAGCTTT		T	T	G	C	G	G	C	A	A	G	C	T	T	T
3R	+	3R+24949088	FBti0039287	EPgy2	ATCGTGAC	AACATCGTGACTTT		A	A	C	A	T	C	G	T	G	A	C	T	T	T
3R	+	3R+24953604	FBti0024137	EPgy2	TGCACTGG	AAGTGCACTGGTCC		A	A	G	T	G	C	A	C	T	G	G	T	C	C
3R	+	3R+25026138	FBti0039506	EPgy2	GGCTGTTG	AACGGCTGTTGTTT		A	A	C	G	G	C	T	G	T	T	G	T	T	T
3R	+	3R+25108804	FBti0024901	EPgy2	GTTGTGAG	TTGGTTGTGAGTAA		T	T	G	G	T	T	G	T	G	A	G	T	A	A
3R	+	3R+25283211	FBti0039450	EPgy2	TACCAGGC	ATATACCAGGCCAA		A	T	A	T	A	C	C	A	G	G	C	C	A	A
3R	+	3R+25315143	FBti0038791	EPgy2	GTCTGTGG	TCAGTCTGTGGAAA		T	C	A	G	T	C	T	G	T	G	G	A	A	A
3R	+	3R+25562743	FBti0039580	EPgy2	CTGTGGGC	ATGCTGTGGGCCAC		A	T	G	C	T	G	T	G	G	G	C	C	A	C
3R	+	3R+25574545	FBti0027213	EPgy2	CCCCAGCT	ATTCCCCAGCTGTT		A	T	T	C	C	C	C	A	G	C	T	G	T	T
3R	+	3R+25593164	FBti0057816	EPgy2	GTCCCACG	AAAGTCCCACGGAA		A	A	A	G	T	C	C	C	A	C	G	G	A	A
3R	+	3R+25598639	FBti0024851	EPgy2	GTCAGGGC	TTAGTCAGGGCGAT		T	T	A	G	T	C	A	G	G	G	C	G	A	T
3R	+	3R+25667380	FBti0057699	EPgy2	GAGAGCCA	GGGGAGAGCCAATA		G	G	G	G	A	G	A	G	C	C	A	A	T	A
3R	+	3R+25683171	FBti0033266	EPgy2	CCCCCAAC	TGCCCCCCAACCGT		T	G	C	C	C	C	C	C	A	A	C	C	G	T
3R	+	3R+25733557	FBti0076097	EPgy2	ACACACGC	TCAACACACGCTGT		T	C	A	A	C	A	C	A	C	G	C	T	G	T
3R	+	3R+25823600	FBti0027138	EPgy2	GTTTAATA	GTAGTTTAATAGCA		G	T	A	G	T	T	T	A	A	T	A	G	C	A
3R	+	3R+25838471	FBti0025141	EPgy2	GACACGAG	AAAGACACGAGCCA		A	A	A	G	A	C	A	C	G	A	G	C	C	A
3R	+	3R+25847853	FBti0039491	EPgy2	ACCTGCCC	TTGACCTGCCCCAA		T	T	G	A	C	C	T	G	C	C	C	C	A	A
3R	+	3R+25848622	FBti0039000	EPgy2	GGCTCAGC	TCTGGCTCAGCCAA		T	C	T	G	G	C	T	C	A	G	C	C	A	A
3R	+	3R+25863029	FBti0027204	EPgy2	CTCTAGAC	GGCCTCTAGACGAC		G	G	C	C	T	C	T	A	G	A	C	G	A	C
3R	+	3R+25878334	FBti0075892	EPgy2	AAACAGCA	ATTAAACAGCAAAT		A	T	T	A	A	A	C	A	G	C	A	A	A	T
3R	+	3R+25960026	FBti0039142	EPgy2	ATTGTACT	AACATTGTACTTAT		A	A	C	A	T	T	G	T	A	C	T	T	A	T
3R	+	3R+26031863	FBti0076130	EPgy2	AGTAAGAC	GCCAGTAAGACCTT		G	C	C	A	G	T	A	A	G	A	C	C	T	T
3R	+	3R+26098678	FBti0027265	EPgy2	CTGCGGTC	GCGCTGCGGTCTAA		G	C	G	C	T	G	C	G	G	T	C	T	A	A
3R	+	3R+26102891	FBti0039754	EPgy2	ACGTCGTT	TTAACGTCGTTGTC		T	T	A	A	C	G	T	C	G	T	T	G	T	C
3R	+	3R+26249625	FBti0057615	EPgy2	CTCCCGAG	ATTCTCCCGAGTCT		A	T	T	C	T	C	C	C	G	A	G	T	C	T
3R	+	3R+26250877	FBti0039619	EPgy2	GGTTAATT	TTGGGTTAATTGCT		T	T	G	G	G	T	T	A	A	T	T	G	C	T
3R	+	3R+26644670	FBti0033166	EPgy2	GTTCAGGC	TCAGTTCAGGCCAA		T	C	A	G	T	T	C	A	G	G	C	C	A	A
3R	+	3R+26928045	FBti0038682	EPgy2	ATGGGGAG	ATAATGGGGAGCGA		A	T	A	A	T	G	G	G	G	A	G	C	G	A
3R	+	3R+27288894	FBti0038883	EPgy2	TCGTGGAC	ATGTCGTGGACAAA		A	T	G	T	C	G	T	G	G	A	C	A	A	A
3R	+	3R+27353927	FBti0038788	EPgy2	ATCCGGTC	ACAATCCGGTCGCT		A	C	A	A	T	C	C	G	G	T	C	G	C	T
3R	+	3R+27443732	FBti0027074	EPgy2	GAGCAGAC	AAAGAGCAGACAAT		A	A	A	G	A	G	C	A	G	A	C	A	A	T
3R	+	3R+27569288	FBti0027251	EPgy2	GTATCGAC	GTGGTATCGACTAC		G	T	G	G	T	A	T	C	G	A	C	T	A	C
3R	+	3R+27573421	FBti0027210	EPgy2	GTCCAGCC	GCGGTCCAGCCACA		G	C	G	G	T	C	C	A	G	C	C	A	C	A
3R	+	3R+27590754	FBti0033367	EPgy2	AGCATCAC	ATCAGCATCACAGT		A	T	C	A	G	C	A	T	C	A	C	A	G	T
3R	+	3R+27598024	FBti0040263	EPgy2	GTCCGCGC	AGAGTCCGCGCTGT		A	G	A	G	T	C	C	G	C	G	C	T	G	T
3R	+	3R+27602705	FBti0025236	EPgy2	CTCTCTGC	TCACTCTCTGCTTT		T	C	A	C	T	C	T	C	T	G	C	T	T	T
3R	+	3R+27619764	FBti0039545	EPgy2	CACAGACC	GTCCACAGACCCAC		G	T	C	C	A	C	A	G	A	C	C	C	A	C
3R	+	3R+27619799	FBti0075986	EPgy2	CCCACAAT	AGACCCACAATCGA		A	G	A	C	C	C	A	C	A	A	T	C	G	A
3R	+	3R+27631062	FBti0039191	EPgy2	CAATAACT	ACACAATAACTTTA		A	C	A	C	A	A	T	A	A	C	T	T	T	A
3R	+	3R+27788880	FBti0057837	EPgy2	GTCCAGAC	ATAGTCCAGACATA		A	T	A	G	T	C	C	A	G	A	C	A	T	A
3R	+	3R+27852961	FBti0039509	EPgy2	GTTCGTGT	TGTGTTCGTGTGTT		T	G	T	G	T	T	C	G	T	G	T	G	T	T
3RHet	+	3RHet+630162	FBti0075447	EPgy2	TTCTGACT	GTCTTCTGACTCTT		G	T	C	T	T	C	T	G	A	C	T	C	T	T
4	+	4+90315	FBti0100344	EPgy2	GTTGGGGG	TTGGTTGGGGGCAA		T	T	G	G	T	T	G	G	G	G	G	C	A	A
4	+	4+681097	FBti0100343	EPgy2	GTTCCGTT	TTAGTTCCGTTCGA		T	T	A	G	T	T	C	C	G	T	T	C	G	A
X	+	X+38101	FBti0024082	EPgy2	GTATTACT	TTGGTATTACTCAA		T	T	G	G	T	A	T	T	A	C	T	C	A	A
X	+	X+156638	FBti0075836	EPgy2	GGCCAACT	AAGGGCCAACTTGA		A	A	G	G	G	C	C	A	A	C	T	T	G	A
X	+	X+245297	FBti0040086	EPgy2	AGCGAGAG	TGGAGCGAGAGTTG		T	G	G	A	G	C	G	A	G	A	G	T	T	G
X	+	X+517431	FBti0057927	EPgy2	AGCTCGCC	GCAAGCTCGCCGTT		G	C	A	A	G	C	T	C	G	C	C	G	T	T
X	+	X+540510	FBti0040187	EPgy2	GGTGCGGG	TGCGGTGCGGGTAA		T	G	C	G	G	T	G	C	G	G	G	T	A	A
X	+	X+563687	FBti0057757	EPgy2	GTCGATTC	TTTGTCGATTCGAT		T	T	T	G	T	C	G	A	T	T	C	G	A	T
X	+	X+580864	FBti0040047	EPgy2	ACGTGGTC	ATCACGTGGTCTTT		A	T	C	A	C	G	T	G	G	T	C	T	T	T
X	+	X+586909	FBti0075932	EPgy2	GCTGGCGG	TCGGCTGGCGGCAG		T	C	G	G	C	T	G	G	C	G	G	C	A	G
X	+	X+664050	FBti0039697	EPgy2	TTCGGTTC	TTATTCGGTTCCCT		T	T	A	T	T	C	G	G	T	T	C	C	C	T
X	+	X+695485	FBti0039421	EPgy2	TGCTGCGC	CCTTGCTGCGCTCG		C	C	T	T	G	C	T	G	C	G	C	T	C	G
X	+	X+700078	FBti0024111	EPgy2	ACGTGACG	AGAACGTGACGTAT		A	G	A	A	C	G	T	G	A	C	G	T	A	T
X	+	X+829195	FBti0100475	EPgy2	GTCGCAAG	TAAGTCGCAAGTTT		T	A	A	G	T	C	G	C	A	A	G	T	T	T
X	+	X+894073	FBti0038914	EPgy2	ACGAAATC	ATGACGAAATCTAA		A	T	G	A	C	G	A	A	A	T	C	T	A	A
X	+	X+927264	FBti0033199	EPgy2	CCTTCACC	TTGCCTTCACCATC		T	T	G	C	C	T	T	C	A	C	C	A	T	C
X	+	X+1103959	FBti0040247	EPgy2	AGCGCCGT	ACGAGCGCCGTTAC		A	C	G	A	G	C	G	C	C	G	T	T	A	C
X	+	X+1144312	FBti0033171	EPgy2	CCCTTGAC	GTCCCCTTGACACT		G	T	C	C	C	C	T	T	G	A	C	A	C	T
X	+	X+1282293	FBti0039486	EPgy2	TGCGGGAC	GAGTGCGGGACTTT		G	A	G	T	G	C	G	G	G	A	C	T	T	T
X	+	X+1287128	FBti0039334	EPgy2	GGCCGAAC	GGAGGCCGAACGGA		G	G	A	G	G	C	C	G	A	A	C	G	G	A
X	+	X+1345626	FBti0057916	EPgy2	TCCCGGAG	AACTCCCGGAGATT		A	A	C	T	C	C	C	G	G	A	G	A	T	T
X	+	X+1370941	FBti0057692	EPgy2	GGCAGGGG	TGGGGCAGGGGGAG		T	G	G	G	G	C	A	G	G	G	G	G	A	G
X	+	X+1372640	FBti0039709	EPgy2	GGCCAGCT	TAGGGCCAGCTGGA		T	A	G	G	G	C	C	A	G	C	T	G	G	A
X	+	X+1539480	FBti0025148	EPgy2	CCCTACGG	AGACCCTACGGGGT		A	G	A	C	C	C	T	A	C	G	G	G	G	T
X	+	X+1759743	FBti0039024	EPgy2	TTTCCAGC	AAATTTCCAGCGGC		A	A	A	T	T	T	C	C	A	G	C	G	G	C
X	+	X+1771379	FBti0038959	EPgy2	GCCGTGAA	CTCGCCGTGAAACG		C	T	C	G	C	C	G	T	G	A	A	A	C	G
X	+	X+1774593	FBti0100358	EPgy2	ATTGAGCG	ATCATTGAGCGAAT		A	T	C	A	T	T	G	A	G	C	G	A	A	T
X	+	X+1787663	FBti0057691	EPgy2	CCTCGGCT	ATCCCTCGGCTTCA		A	T	C	C	C	T	C	G	G	C	T	T	C	A
X	+	X+1846109	FBti0075909	EPgy2	CCTCCGCC	GCGCCTCCGCCTCT		G	C	G	C	C	T	C	C	G	C	C	T	C	T
X	+	X+1906302	FBti0039759	EPgy2	ACTCAATG	ATGACTCAATGCAA		A	T	G	A	C	T	C	A	A	T	G	C	A	A
X	+	X+1930518	FBti0057940	EPgy2	CTCTGAAC	ACGCTCTGAACTTC		A	C	G	C	T	C	T	G	A	A	C	T	T	C
X	+	X+1977907	FBti0039581	EPgy2	GTCGTGAC	ATTGTCGTGACCCA		A	T	T	G	T	C	G	T	G	A	C	C	C	A
X	+	X+2069689	FBti0027246	EPgy2	GTCCTGAA	ATTGTCCTGAATTT		A	T	T	G	T	C	C	T	G	A	A	T	T	T
X	+	X+2119360	FBti0057641	EPgy2	ACCTATCG	CCCACCTATCGTAC		C	C	C	A	C	C	T	A	T	C	G	T	A	C
X	+	X+2170335	FBti0077807	EPgy2	GGTGAGGG	GTGGGTGAGGGCGT		G	T	G	G	G	T	G	A	G	G	G	C	G	T
X	+	X+2192295	FBti0075996	EPgy2	GGGGAGGG	GTGGGGGAGGGCAA		G	T	G	G	G	G	G	A	G	G	G	C	A	A
X	+	X+2197909	FBti0040278	EPgy2	GGCTTACT	GAAGGCTTACTGCT		G	A	A	G	G	C	T	T	A	C	T	G	C	T
X	+	X+2448092	FBti0057798	EPgy2	GCTGTAAG	AATGCTGTAAGGTT		A	A	T	G	C	T	G	T	A	A	G	G	T	T
X	+	X+2479855	FBti0027289	EPgy2	ACTAGAAT	AAGACTAGAATCAA		A	A	G	A	C	T	A	G	A	A	T	C	A	A
X	+	X+2483224	FBti0027262	EPgy2	CACTGTTG	CAGCACTGTTGATG		C	A	G	C	A	C	T	G	T	T	G	A	T	G
X	+	X+2552745	FBti0033198	EPgy2	CTCCCACC	TCGCTCCCACCCAC		T	C	G	C	T	C	C	C	A	C	C	C	A	C
X	+	X+2614340	FBti0027352	EPgy2	GACAGGGG	GAGGACAGGGGCCC		G	A	G	G	A	C	A	G	G	G	G	C	C	C
X	+	X+2823677	FBti0039912	EPgy2	GCCCAGCT	AAAGCCCAGCTGTT		A	A	A	G	C	C	C	A	G	C	T	G	T	T
X	+	X+2823731	FBti0075959	EPgy2	GTCGGTGT	TGTGTCGGTGTCTT		T	G	T	G	T	C	G	G	T	G	T	C	T	T
X	+	X+2841423	FBti0027225	EPgy2	ATTAGGAA	AGCATTAGGAAGAA		A	G	C	A	T	T	A	G	G	A	A	G	A	A
X	+	X+3379709	FBti0027279	EPgy2	ACTCGTAG	TTTACTCGTAGTTT		T	T	T	A	C	T	C	G	T	A	G	T	T	T
X	+	X+3587414	FBti0039511	EPgy2	CTCCGGCT	GGCCTCCGGCTAAT		G	G	C	C	T	C	C	G	G	C	T	A	A	T
X	+	X+3672240	FBti0039639	EPgy2	AATCAGCT	ATGAATCAGCTGTT		A	T	G	A	A	T	C	A	G	C	T	G	T	T
X	+	X+3683840	FBti0025190	EPgy2	CTCTGGTA	TTACTCTGGTAAGG		T	T	A	C	T	C	T	G	G	T	A	A	G	G
X	+	X+3766406	FBti0040126	EPgy2	GCCGAGGA	AAAGCCGAGGAGAA		A	A	A	G	C	C	G	A	G	G	A	G	A	A
X	+	X+3994970	FBti0038822	EPgy2	GTTTGTGG	AAGGTTTGTGGCTA		A	A	G	G	T	T	T	G	T	G	G	C	T	A
X	+	X+3998255	FBti0038752	EPgy2	GGCTCGCC	ACGGGCTCGCCTAC		A	C	G	G	G	C	T	C	G	C	C	T	A	C
X	+	X+4013723	FBti0057822	EPgy2	GTGCCTCC	TTTGTGCCTCCTTT		T	T	T	G	T	G	C	C	T	C	C	T	T	T
X	+	X+4013926	FBti0057769	EPgy2	CTCGAAAC	ATACTCGAAACACT		A	T	A	C	T	C	G	A	A	A	C	A	C	T
X	+	X+4543867	FBti0075902	EPgy2	ACTTGTCT	CAGACTTGTCTCTC		C	A	G	A	C	T	T	G	T	C	T	C	T	C
X	+	X+4769671	FBti0100476	EPgy2	CTCTGCTG	TTCCTCTGCTGATT		T	T	C	C	T	C	T	G	C	T	G	A	T	T
X	+	X+4813560	FBti0039561	EPgy2	GTTTGCTC	TTTGTTTGCTCCTC		T	T	T	G	T	T	T	G	C	T	C	C	T	C
X	+	X+4980597	FBti0027276	EPgy2	GGAAGGAC	TGAGGAAGGACTCT		T	G	A	G	G	A	A	G	G	A	C	T	C	T
X	+	X+4988557	FBti0058021	EPgy2	CTCGTGGC	CGACTCGTGGCTCA		C	G	A	C	T	C	G	T	G	G	C	T	C	A
X	+	X+5206393	FBti0038855	EPgy2	GTCTAGAC	CATGTCTAGACTAA		C	A	T	G	T	C	T	A	G	A	C	T	A	A
X	+	X+5211364	FBti0027263	EPgy2	CTCCGGAT	AAACTCCGGATGTT		A	A	A	C	T	C	C	G	G	A	T	G	T	T
X	+	X+5316338	FBti0075835	EPgy2	GGGTGGAG	CAGGGGTGGAGATT		C	A	G	G	G	G	T	G	G	A	G	A	T	T
X	+	X+5508430	FBti0039438	EPgy2	CTGCATGT	TGGCTGCATGTGAC		T	G	G	C	T	G	C	A	T	G	T	G	A	C
X	+	X+5596544	FBti0039112	EPgy2	GATTGGAT	AGCGATTGGATTGA		A	G	C	G	A	T	T	G	G	A	T	T	G	A
X	+	X+5767182	FBti0038738	EPgy2	CCACGAAC	TCACCACGAACGGT		T	C	A	C	C	A	C	G	A	A	C	G	G	T
X	+	X+5793157	FBti0076054	EPgy2	ACACGGGC	AGCACACGGGCAAT		A	G	C	A	C	A	C	G	G	G	C	A	A	T
X	+	X+5795729	FBti0057687	EPgy2	TTTTGTGC	TTGTTTTGTGCTGT		T	T	G	T	T	T	T	G	T	G	C	T	G	T
X	+	X+5859839	FBti0027248	EPgy2	CGAGTTGT	ACGCGAGTTGTGGG		A	C	G	C	G	A	G	T	T	G	T	G	G	G
X	+	X+5987881	FBti0075966	EPgy2	GGCCAGTT	TTTGGCCAGTTGGG		T	T	T	G	G	C	C	A	G	T	T	G	G	G
X	+	X+6118619	FBti0038967	EPgy2	GGTCAGCT	GGTGGTCAGCTGTA		G	G	T	G	G	T	C	A	G	C	T	G	T	A
X	+	X+6170721	FBti0039296	EPgy2	ATACGTAC	TATATACGTACCCC		T	A	T	A	T	A	C	G	T	A	C	C	C	C
X	+	X+6173761	FBti0038999	EPgy2	GCCTGGCC	ATCGCCTGGCCAGT		A	T	C	G	C	C	T	G	G	C	C	A	G	T
X	+	X+6181971	FBti0039293	EPgy2	CGATTAAG	TAACGATTAAGTCG		T	A	A	C	G	A	T	T	A	A	G	T	C	G
X	+	X+6182178	FBti0033359	EPgy2	ACGTATAC	AGCACGTATACGAT		A	G	C	A	C	G	T	A	T	A	C	G	A	T
X	+	X+6189464	FBti0075992	EPgy2	CAATTGAC	TTACAATTGACTCT		T	T	A	C	A	A	T	T	G	A	C	T	C	T
X	+	X+6225105	FBti0076147	EPgy2	ACCCCGTT	CTTACCCCGTTACT		C	T	T	A	C	C	C	C	G	T	T	A	C	T
X	+	X+6434744	FBti0038746	EPgy2	GGGTGGCC	CTCGGGTGGCCTCG		C	T	C	G	G	G	T	G	G	C	C	T	C	G
X	+	X+6465886	FBti0038715	EPgy2	TACTGAAC	AACTACTGAACCCA		A	A	C	T	A	C	T	G	A	A	C	C	C	A
X	+	X+6493526	FBti0040224	EPgy2	GTTATATC	AGAGTTATATCAAT		A	G	A	G	T	T	A	T	A	T	C	A	A	T
X	+	X+6534445	FBti0024119	EPgy2	CGTCAGCC	TTACGTCAGCCAAT		T	T	A	C	G	T	C	A	G	C	C	A	A	T
X	+	X+6548675	FBti0039414	EPgy2	GTTGATAG	TCGGTTGATAGTGA		T	C	G	G	T	T	G	A	T	A	G	T	G	A
X	+	X+6550534	FBti0027095	EPgy2	ACCCACAC	ATCACCCACACCAC		A	T	C	A	C	C	C	A	C	A	C	C	A	C
X	+	X+6573644	FBti0057621	EPgy2	CTGTAGCC	ATACTGTAGCCTAA		A	T	A	C	T	G	T	A	G	C	C	T	A	A
X	+	X+6593512	FBti0039347	EPgy2	GGCTGGCT	ATCGGCTGGCTGGA		A	T	C	G	G	C	T	G	G	C	T	G	G	A
X	+	X+6600962	FBti0075852	EPgy2	ATTTCGCC	TTCATTTCGCCTTT		T	T	C	A	T	T	T	C	G	C	C	T	T	T
X	+	X+6650525	FBti0057595	EPgy2	GGACGTGC	AACGGACGTGCTTT		A	A	C	G	G	A	C	G	T	G	C	T	T	T
X	+	X+6667314	FBti0033217	EPgy2	TTCTGTAC	TTGTTCTGTACTCT		T	T	G	T	T	C	T	G	T	A	C	T	C	T
X	+	X+6746600	FBti0039225	EPgy2	GTTCGGGC	TCGGTTCGGGCGGC		T	C	G	G	T	T	C	G	G	G	C	G	G	C
X	+	X+6762196	FBti0039910	EPgy2	GTCGTGCG	GTGGTCGTGCGGTT		G	T	G	G	T	C	G	T	G	C	G	G	T	T
X	+	X+7145214	FBti0038960	EPgy2	CCTCCAAC	GCGCCTCCAACAGT		G	C	G	C	C	T	C	C	A	A	C	A	G	T
X	+	X+7180199	FBti0038732	EPgy2	GACCAGGC	GTTGACCAGGCGAA		G	T	T	G	A	C	C	A	G	G	C	G	A	A
X	+	X+7228084	FBti0039428	EPgy2	GGTGGAGC	ATTGGTGGAGCTTG		A	T	T	G	G	T	G	G	A	G	C	T	T	G
X	+	X+7596730	FBti0039228	EPgy2	CAATGGAC	ATACAATGGACCCA		A	T	A	C	A	A	T	G	G	A	C	C	C	A
X	+	X+7865312	FBti0040147	EPgy2	GACTTGAG	TGTGACTTGAGCAT		T	G	T	G	A	C	T	T	G	A	G	C	A	T
X	+	X+7954945	FBti0038083	EPgy2	GTGCAGCT	TTGGTGCAGCTTGA		T	T	G	G	T	G	C	A	G	C	T	T	G	A
X	+	X+8001858	FBti0039206	EPgy2	CTTCTGTG	AGGCTTCTGTGCTT		A	G	G	C	T	T	C	T	G	T	G	C	T	T
X	+	X+8010151	FBti0039271	EPgy2	GCTCCAAC	CACGCTCCAACACC		C	A	C	G	C	T	C	C	A	A	C	A	C	C
X	+	X+8051649	FBti0040229	EPgy2	GCCAAAAG	AGCGCCAAAAGTCT		A	G	C	G	C	C	A	A	A	A	G	T	C	T
X	+	X+8137335	FBti0075940	EPgy2	CCCCATAG	AAGCCCCATAGCAG		A	A	G	C	C	C	C	A	T	A	G	C	A	G
X	+	X+8312524	FBti0039214	EPgy2	GAACAACC	TTTGAACAACCGAT		T	T	T	G	A	A	C	A	A	C	C	G	A	T
X	+	X+8317007	FBti0025247	EPgy2	ATCCAGCG	GACATCCAGCGTAT		G	A	C	A	T	C	C	A	G	C	G	T	A	T
X	+	X+8455591	FBti0058032	EPgy2	GGGCAGCA	AGTGGGCAGCAAAA		A	G	T	G	G	G	C	A	G	C	A	A	A	A
X	+	X+8482819	FBti0075834	EPgy2	GTGTACAT	ATCGTGTACATGAA		A	T	C	G	T	G	T	A	C	A	T	G	A	A
X	+	X+8486095	FBti0057602	EPgy2	TGTACACG	TCATGTACACGATC		T	C	A	T	G	T	A	C	A	C	G	A	T	C
X	+	X+8603362	FBti0076104	EPgy2	AACTGAAC	CTGAACTGAACTGA		C	T	G	A	A	C	T	G	A	A	C	T	G	A
X	+	X+8819053	FBti0057831	EPgy2	CCCGAACC	AAACCCGAACCCGA		A	A	A	C	C	C	G	A	A	C	C	C	G	A
X	+	X+8972529	FBti0039959	EPgy2	GGAATCAT	ATTGGAATCATCTG		A	T	T	G	G	A	A	T	C	A	T	C	T	G
X	+	X+9056145	FBti0039599	EPgy2	TGCGCAAA	AGCTGCGCAAACAA		A	G	C	T	G	C	G	C	A	A	A	C	A	A
X	+	X+9058135	FBti0027252	EPgy2	GCACGAAG	CTCGCACGAAGCAG		C	T	C	G	C	A	C	G	A	A	G	C	A	G
X	+	X+9090426	FBti0027318	EPgy2	AACTCCCC	GTAAACTCCCCCAA		G	T	A	A	A	C	T	C	C	C	C	C	A	A
X	+	X+9137504	FBti0057912	EPgy2	CCCACGCT	CTGCCCACGCTCAT		C	T	G	C	C	C	A	C	G	C	T	C	A	T
X	+	X+9167005	FBti0077809	EPgy2	GTATCGCC	AAAGTATCGCCTGG		A	A	A	G	T	A	T	C	G	C	C	T	G	G
X	+	X+9250069	FBti0024877	EPgy2	GTACACGT	TTGGTACACGTCAT		T	T	G	G	T	A	C	A	C	G	T	C	A	T
X	+	X+9251709	FBti0038982	EPgy2	AGCTAAGC	TGCAGCTAAGCTCT		T	G	C	A	G	C	T	A	A	G	C	T	C	T
X	+	X+9479705	FBti0057788	EPgy2	ACTGTGCC	ATGACTGTGCCCAA		A	T	G	A	C	T	G	T	G	C	C	C	A	A
X	+	X+9976820	FBti0038741	EPgy2	GCCCAGCC	CTGGCCCAGCCATA		C	T	G	G	C	C	C	A	G	C	C	A	T	A
X	+	X+10103700	FBti0075463	EPgy2	GTAGAAAG	ATAGTAGAAAGCAT		A	T	A	G	T	A	G	A	A	A	G	C	A	T
X	+	X+10150733	FBti0027057	EPgy2	GCCGGACT	TGAGCCGGACTCTT		T	G	A	G	C	C	G	G	A	C	T	C	T	T
X	+	X+10223848	FBti0076038	EPgy2	GTCCGGTC	AGTGTCCGGTCCGG		A	G	T	G	T	C	C	G	G	T	C	C	G	G
X	+	X+10260973	FBti0039981	EPgy2	GGCTGCAG	TTCGGCTGCAGGTG		T	T	C	G	G	C	T	G	C	A	G	G	T	G
X	+	X+10262114	FBti0039831	EPgy2	GTCGCAAG	GCGGTCGCAAGAGA		G	C	G	G	T	C	G	C	A	A	G	A	G	A
X	+	X+10279876	FBti0057713	EPgy2	GGTTAGTG	ATGGGTTAGTGCGA		A	T	G	G	G	T	T	A	G	T	G	C	G	A
X	+	X+10368108	FBti0039283	EPgy2	GATTGCAT	TTCGATTGCATTTT		T	T	C	G	A	T	T	G	C	A	T	T	T	T
X	+	X+10368469	FBti0039460	EPgy2	CTCTGCTC	TGGCTCTGCTCGAG		T	G	G	C	T	C	T	G	C	T	C	G	A	G
X	+	X+10440875	FBti0025290	EPgy2	GTTTGTAC	TATGTTTGTACATA		T	A	T	G	T	T	T	G	T	A	C	A	T	A
X	+	X+10636676	FBti0057974	EPgy2	AGAGCAGA	AACAGAGCAGAGGA		A	A	C	A	G	A	G	C	A	G	A	G	G	A
X	+	X+10638659	FBti0040248	EPgy2	AGCCAGCG	AGAAGCCAGCGAAG		A	G	A	A	G	C	C	A	G	C	G	A	A	G
X	+	X+10751737	FBti0038748	EPgy2	CGCTCCAC	CCACGCTCCACGCT		C	C	A	C	G	C	T	C	C	A	C	G	C	T
X	+	X+11018653	FBti0025257	EPgy2	CGCTCTCC	TTGCGCTCTCCCAT		T	T	G	C	G	C	T	C	T	C	C	C	A	T
X	+	X+11039069	FBti0039254	EPgy2	CTCTTGGT	AAACTCTTGGTTTC		A	A	A	C	T	C	T	T	G	G	T	T	T	C
X	+	X+11283694	FBti0027353	EPgy2	CGCGTCAC	ACTCGCGTCACGAT		A	C	T	C	G	C	G	T	C	A	C	G	A	T
X	+	X+11348967	FBti0057609	EPgy2	GGCTCCGG	TTCGGCTCCGGCTT		T	T	C	G	G	C	T	C	C	G	G	C	T	T
X	+	X+11452694	FBti0058030	EPgy2	AGCCAAAC	CAAAGCCAAACGCA		C	A	A	A	G	C	C	A	A	A	C	G	C	A
X	+	X+11464711	FBti0039272	EPgy2	GAACGGAG	ATCGAACGGAGCCT		A	T	C	G	A	A	C	G	G	A	G	C	C	T
X	+	X+11494958	FBti0039309	EPgy2	GCAGGGAG	ATAGCAGGGAGTAA		A	T	A	G	C	A	G	G	G	A	G	T	A	A
X	+	X+11505404	FBti0038858	EPgy2	GGCACACT	TTCGGCACACTACT		T	T	C	G	G	C	A	C	A	C	T	A	C	T
X	+	X+11510059	FBti0057649	EPgy2	CGACGGCT	CGTCGACGGCTGCA		C	G	T	C	G	A	C	G	G	C	T	G	C	A
X	+	X+11575990	FBti0039527	EPgy2	GGTCTAAC	TCGGGTCTAACCTT		T	C	G	G	G	T	C	T	A	A	C	C	T	T
X	+	X+11590138	FBti0057689	EPgy2	GCACAAAG	ACGGCACAAAGCAA		A	C	G	G	C	A	C	A	A	A	G	C	A	A
X	+	X+11686628	FBti0075990	EPgy2	AGCGGAAC	TCGAGCGGAACATT		T	C	G	A	G	C	G	G	A	A	C	A	T	T
X	+	X+11710514	FBti0025282	EPgy2	GCATCGCG	ATGGCATCGCGCAA		A	T	G	G	C	A	T	C	G	C	G	C	A	A
X	+	X+11714292	FBti0039565	EPgy2	GTGCAATG	AAAGTGCAATGTGG		A	A	A	G	T	G	C	A	A	T	G	T	G	G
X	+	X+11749018	FBti0039497	EPgy2	GCCCAGGC	ATCGCCCAGGCGTT		A	T	C	G	C	C	C	A	G	G	C	G	T	T
X	+	X+11786079	FBti0038076	EPgy2	GGCCAAAC	TTCGGCCAAACCGA		T	T	C	G	G	C	C	A	A	A	C	C	G	A
X	+	X+11901120	FBti0039966	EPgy2	CTGAGAAC	CAACTGAGAACAAT		C	A	A	C	T	G	A	G	A	A	C	A	A	T
X	+	X+11912688	FBti0024893	EPgy2	GCGGCGTC	TCGGCGGCGTCTTT		T	C	G	G	C	G	G	C	G	T	C	T	T	T
X	+	X+12391221	FBti0039837	EPgy2	ATTGAGCG	TAAATTGAGCGTTT		T	A	A	A	T	T	G	A	G	C	G	T	T	T
X	+	X+12506101	FBti0025142	EPgy2	AACGAAAC	AACAACGAAACTGT		A	A	C	A	A	C	G	A	A	A	C	T	G	T
X	+	X+12543994	FBti0024836	EPgy2	TCCGTGTC	ATCTCCGTGTCCAA		A	T	C	T	C	C	G	T	G	T	C	C	A	A
X	+	X+12557442	FBti0039961	EPgy2	CACCCACC	TTCCACCCACCATG		T	T	C	C	A	C	C	C	A	C	C	A	T	G
X	+	X+12564642	FBti0038920	EPgy2	GTCACTGG	AAAGTCACTGGCAA		A	A	A	G	T	C	A	C	T	G	G	C	A	A
X	+	X+12578386	FBti0075870	EPgy2	GGCAAAGC	ACTGGCAAAGCAAA		A	C	T	G	G	C	A	A	A	G	C	A	A	A
X	+	X+12746022	FBti0027362	EPgy2	TGTTGGCC	TGCTGTTGGCCTCG		T	G	C	T	G	T	T	G	G	C	C	T	C	G
X	+	X+12790669	FBti0075850	EPgy2	GCTTTAGC	GCTGCTTTAGCGGT		G	C	T	G	C	T	T	T	A	G	C	G	G	T
X	+	X+13053840	FBti0076137	EPgy2	TAATATTA	CTATAATATTACAA		C	T	A	T	A	A	T	A	T	T	A	C	A	A
X	+	X+13209487	FBti0038949	EPgy2	GGCTGACC	TGGGGCTGACCACT		T	G	G	G	G	C	T	G	A	C	C	A	C	T
X	+	X+13252424	FBti0040186	EPgy2	GGGATGAG	CCGGGGATGAGGAT		C	C	G	G	G	G	A	T	G	A	G	G	A	T
X	+	X+13278970	FBti0100362	EPgy2	GTGTGGCC	ATGGTGTGGCCCAT		A	T	G	G	T	G	T	G	G	C	C	C	A	T
X	+	X+13289123	FBti0024882	EPgy2	GTTTGCTC	AGTGTTTGCTCGAC		A	G	T	G	T	T	T	G	C	T	C	G	A	C
X	+	X+13307254	FBti0039407	EPgy2	CAACAGGC	ACGCAACAGGCTTG		A	C	G	C	A	A	C	A	G	G	C	T	T	G
X	+	X+13518403	FBti0038804	EPgy2	CACCGCAC	ATGCACCGCACTCT		A	T	G	C	A	C	C	G	C	A	C	T	C	T
X	+	X+13562066	FBti0038857	EPgy2	GCTGCTTG	TCTGCTGCTTGCAT		T	C	T	G	C	T	G	C	T	T	G	C	A	T
X	+	X+13650369	FBti0075935	EPgy2	CGTCAGCG	GTGCGTCAGCGATA		G	T	G	C	G	T	C	A	G	C	G	A	T	A
X	+	X+13656768	FBti0040004	EPgy2	GAGCGACT	TTGGAGCGACTGTC		T	T	G	G	A	G	C	G	A	C	T	G	T	C
X	+	X+13658192	FBti0075934	EPgy2	GGCCAGAC	AATGGCCAGACCCA		A	A	T	G	G	C	C	A	G	A	C	C	C	A
X	+	X+13710863	FBti0027299	EPgy2	AAAAGGTG	GTAAAAAGGTGTAA		G	T	A	A	A	A	A	G	G	T	G	T	A	A
X	+	X+13728097	FBti0027339	EPgy2	GCTCAGGC	TCGGCTCAGGCAAT		T	C	G	G	C	T	C	A	G	G	C	A	A	T
X	+	X+14087242	FBti0039658	EPgy2	CTGTGTAT	ATGCTGTGTATGAA		A	T	G	C	T	G	T	G	T	A	T	G	A	A
X	+	X+14105396	FBti0025239	EPgy2	ATCCAGGC	TTGATCCAGGCGAA		T	T	G	A	T	C	C	A	G	G	C	G	A	A
X	+	X+14106377	FBti0039397	EPgy2	CTCCCGGC	TTGCTCCCGGCCAT		T	T	G	C	T	C	C	C	G	G	C	C	A	T
X	+	X+14112322	FBti0038770	EPgy2	TACGTACC	AACTACGTACCTAT		A	A	C	T	A	C	G	T	A	C	C	T	A	T
X	+	X+14141734	FBti0075869	EPgy2	GGCCTGCC	AAGGGCCTGCCTGT		A	A	G	G	G	C	C	T	G	C	C	T	G	T
X	+	X+14474662	FBti0038764	EPgy2	GTCATAGC	TTGGTCATAGCCGA		T	T	G	G	T	C	A	T	A	G	C	C	G	A
X	+	X+14720092	FBti0038747	EPgy2	TTAGGGCT	GTGTTAGGGCTCTG		G	T	G	T	T	A	G	G	G	C	T	C	T	G
X	+	X+14732251	FBti0027308	EPgy2	CGTCTAAC	TCGCGTCTAACTGT		T	C	G	C	G	T	C	T	A	A	C	T	G	T
X	+	X+14733438	FBti0039742	EPgy2	GTGTGGCG	ATGGTGTGGCGATT		A	T	G	G	T	G	T	G	G	C	G	A	T	T
X	+	X+14961075	FBti0040091	EPgy2	GTGTGATG	TGAGTGTGATGGTT		T	G	A	G	T	G	T	G	A	T	G	G	T	T
X	+	X+15001313	FBti0039343	EPgy2	ACCCCCAC	AACACCCCCACAGT		A	A	C	A	C	C	C	C	C	A	C	A	G	T
X	+	X+15227319	FBti0038936	EPgy2	GTTCTTAG	GGGGTTCTTAGAAA		G	G	G	G	T	T	C	T	T	A	G	A	A	A
X	+	X+15239180	FBti0057857	EPgy2	GCTTGGTC	TATGCTTGGTCTAT		T	A	T	G	C	T	T	G	G	T	C	T	A	T
X	+	X+15344288	FBti0033178	EPgy2	GCCTGCCC	AAGGCCTGCCCTAA		A	A	G	G	C	C	T	G	C	C	C	T	A	A
X	+	X+15376403	FBti0057716	EPgy2	GCCCCATC	TCCGCCCCATCATG		T	C	C	G	C	C	C	C	A	T	C	A	T	G
X	+	X+15450049	FBti0033121	EPgy2	GTTCGAGT	TTGGTTCGAGTTTT		T	T	G	G	T	T	C	G	A	G	T	T	T	T
X	+	X+15477938	FBti0039744	EPgy2	CCCTCGAG	TCACCCTCGAGGCT		T	C	A	C	C	C	T	C	G	A	G	G	C	T
X	+	X+15520561	FBti0027065	EPgy2	CGACGGAC	ACACGACGGACGAC		A	C	A	C	G	A	C	G	G	A	C	G	A	C
X	+	X+15583796	FBti0039119	EPgy2	GTTCAAGC	AAAGTTCAAGCACT		A	A	A	G	T	T	C	A	A	G	C	A	C	T
X	+	X+15607708	FBti0027094	EPgy2	GGCACAGG	ACAGGCACAGGAAA		A	C	A	G	G	C	A	C	A	G	G	A	A	A
X	+	X+15664054	FBti0033305	EPgy2	GGTTACGT	ATGGGTTACGTTGT		A	T	G	G	G	T	T	A	C	G	T	T	G	T
X	+	X+15698197	FBti0057829	EPgy2	AAGAGGAG	GTCAAGAGGAGCGG		G	T	C	A	A	G	A	G	G	A	G	C	G	G
X	+	X+15698376	FBti0039962	EPgy2	CAATTGCC	ATCCAATTGCCGTT		A	T	C	C	A	A	T	T	G	C	C	G	T	T
X	+	X+15706098	FBti0039988	EPgy2	GGCTGCAC	ATCGGCTGCACTTA		A	T	C	G	G	C	T	G	C	A	C	T	T	A
X	+	X+15835539	FBti0024085	EPgy2	CGTGGGGC	TTACGTGGGGCTTT		T	T	A	C	G	T	G	G	G	G	C	T	T	T
X	+	X+15980051	FBti0038885	EPgy2	GTTGGGAC	GTGGTTGGGACGCT		G	T	G	G	T	T	G	G	G	A	C	G	C	T
X	+	X+16196969	FBti0057686	EPgy2	TATATGGG	CCATATATGGGTAT		C	C	A	T	A	T	A	T	G	G	G	T	A	T
X	+	X+16244340	FBti0027329	EPgy2	AGCCAGAC	GAAAGCCAGACGAC		G	A	A	A	G	C	C	A	G	A	C	G	A	C
X	+	X+16279591	FBti0025232	EPgy2	CTGTGAGT	ATACTGTGAGTGAC		A	T	A	C	T	G	T	G	A	G	T	G	A	C
X	+	X+16317166	FBti0076076	EPgy2	GTCACGCA	TGAGTCACGCAGCT		T	G	A	G	T	C	A	C	G	C	A	G	C	T
X	+	X+16342911	FBti0038071	EPgy2	GCAAGATC	GCGGCAAGATCGCT		G	C	G	G	C	A	A	G	A	T	C	G	C	T
X	+	X+16427296	FBti0038787	EPgy2	CGGTGAGT	TTACGGTGAGTTTT		T	T	A	C	G	G	T	G	A	G	T	T	T	T
X	+	X+16441498	FBti0027385	EPgy2	GTCAGTTC	AAGGTCAGTTCCAG		A	A	G	G	T	C	A	G	T	T	C	C	A	G
X	+	X+16493312	FBti0058017	EPgy2	CAGCAGTC	TATCAGCAGTCGAA		T	A	T	C	A	G	C	A	G	T	C	G	A	A
X	+	X+16504772	FBti0038818	EPgy2	AGGCCAAA	GACAGGCCAAACAT		G	A	C	A	G	G	C	C	A	A	A	C	A	T
X	+	X+16589215	FBti0039446	EPgy2	ATCGGTCG	TGTATCGGTCGTGT		T	G	T	A	T	C	G	G	T	C	G	T	G	T
X	+	X+16730275	FBti0057854	EPgy2	GCGTAGAG	AGGGCGTAGAGTAA		A	G	G	G	C	G	T	A	G	A	G	T	A	A
X	+	X+17071264	FBti0038964	EPgy2	GTTGGTTT	TTCGTTGGTTTGTT		T	T	C	G	T	T	G	G	T	T	T	G	T	T
X	+	X+17142035	FBti0076153	EPgy2	GGCCCCGC	AAAGGCCCCGCTTC		A	A	A	G	G	C	C	C	C	G	C	T	T	C
X	+	X+17493631	FBti0076157	EPgy2	GGCTACAC	ATGGGCTACACCAA		A	T	G	G	G	C	T	A	C	A	C	C	A	A
X	+	X+18031221	FBti0033133	EPgy2	CTCGCGCG	AAACTCGCGCGTTT		A	A	A	C	T	C	G	C	G	C	G	T	T	T
X	+	X+18268816	FBti0039197	EPgy2	GTTAGAAC	ACCGTTAGAACGAG		A	C	C	G	T	T	A	G	A	A	C	G	A	G
X	+	X+18380995	FBti0038744	EPgy2	AAACAGAC	TTCAAACAGACGTT		T	T	C	A	A	A	C	A	G	A	C	G	T	T
X	+	X+18381198	FBti0038088	EPgy2	GTCCGGAG	GAGGTCCGGAGGTC		G	A	G	G	T	C	C	G	G	A	G	G	T	C
X	+	X+18393879	FBti0057820	EPgy2	ATCCAAAT	ATTATCCAAATGCA		A	T	T	A	T	C	C	A	A	A	T	G	C	A
X	+	X+18410094	FBti0033154	EPgy2	CTGCAGAG	GAGCTGCAGAGCGT		G	A	G	C	T	G	C	A	G	A	G	C	G	T
X	+	X+18551261	FBti0038919	EPgy2	CTCCAAAA	GTACTCCAAAACAT		G	T	A	C	T	C	C	A	A	A	A	C	A	T
X	+	X+18677525	FBti0038711	EPgy2	TGTGCGAC	ATATGTGCGACGCT		A	T	A	T	G	T	G	C	G	A	C	G	C	T
X	+	X+18794339	FBti0057892	EPgy2	GTTACAAC	AAGGTTACAACTAA		A	A	G	G	T	T	A	C	A	A	C	T	A	A
X	+	X+19202096	FBti0033169	EPgy2	TTCTGCGG	ATTTTCTGCGGTAT		A	T	T	T	T	C	T	G	C	G	G	T	A	T
X	+	X+19250652	FBti0039273	EPgy2	GTTGTACC	AAAGTTGTACCTTT		A	A	A	G	T	T	G	T	A	C	C	T	T	T
X	+	X+19373982	FBti0039377	EPgy2	ATGCAGAC	AAGATGCAGACGAA		A	A	G	A	T	G	C	A	G	A	C	G	A	A
X	+	X+19460223	FBti0038941	EPgy2	AGCTGTGC	ATCAGCTGTGCCGA		A	T	C	A	G	C	T	G	T	G	C	C	G	A
X	+	X+19479106	FBti0027380	EPgy2	CACCTCCC	ACACACCTCCCCAA		A	C	A	C	A	C	C	T	C	C	C	C	A	A
X	+	X+19531960	FBti0039554	EPgy2	GTCTTTAG	TTAGTCTTTAGTGA		T	T	A	G	T	C	T	T	T	A	G	T	G	A
X	+	X+19532946	FBti0039222	EPgy2	CTTCTGAA	ATACTTCTGAAGAG		A	T	A	C	T	T	C	T	G	A	A	G	A	G
X	+	X+19536853	FBti0025244	EPgy2	ACACTGCC	ATCACACTGCCAGT		A	T	C	A	C	A	C	T	G	C	C	A	G	T
X	+	X+19582951	FBti0025240	EPgy2	CACTGGAG	TATCACTGGAGTGA		T	A	T	C	A	C	T	G	G	A	G	T	G	A
X	+	X+19595765	FBti0027055	EPgy2	GCCCGCAC	TTCGCCCGCACACT		T	T	C	G	C	C	C	G	C	A	C	A	C	T
X	+	X+19606704	FBti0038778	EPgy2	CTCCTACT	ATACTCCTACTCCA		A	T	A	C	T	C	C	T	A	C	T	C	C	A
X	+	X+19629459	FBti0024899	EPgy2	GTGATAAC	TGGGTGATAACCAA		T	G	G	G	T	G	A	T	A	A	C	C	A	A
X	+	X+19642912	FBti0027261	EPgy2	GTACACAG	TATGTACACAGGAA		T	A	T	G	T	A	C	A	C	A	G	G	A	A
X	+	X+19682168	FBti0027254	EPgy2	GTCTAGGC	GGGGTCTAGGCGAA		G	G	G	G	T	C	T	A	G	G	C	G	A	A
X	+	X+19792222	FBti0040267	EPgy2	CTCTGAAC	TTGCTCTGAACGTA		T	T	G	C	T	C	T	G	A	A	C	G	T	A
X	+	X+20067597	FBti0057660	EPgy2	GTATGGAG	CGGGTATGGAGTAT		C	G	G	G	T	A	T	G	G	A	G	T	A	T
X	+	X+20380150	FBti0058022	EPgy2	CTGCGGAC	TCTCTGCGGACCGA		T	C	T	C	T	G	C	G	G	A	C	C	G	A
X	+	X+20528844	FBti0057962	EPgy2	GTTCTGAA	TGAGTTCTGAAGTC		T	G	A	G	T	T	C	T	G	A	A	G	T	C
X	+	X+21152225	FBti0039756	EPgy2	CGCCAGCT	AAACGCCAGCTGAT		A	A	A	C	G	C	C	A	G	C	T	G	A	T
X	+	X+21221288	FBti0033190	EPgy2	CTTTAGAA	ATACTTTAGAACAA		A	T	A	C	T	T	T	A	G	A	A	C	A	A
X	+	X+21240528	FBti0039600	EPgy2	CCCGTGTC	ATGCCCGTGTCTCA		A	T	G	C	C	C	G	T	G	T	C	T	C	A
X	+	X+21873863	FBti0039459	EPgy2	AGTTGGGG	ATCAGTTGGGGGCT		A	T	C	A	G	T	T	G	G	G	G	G	C	T
X	+	X+21890003	FBti0025294	EPgy2	ATCTGAAC	ATAATCTGAACCGA		A	T	A	A	T	C	T	G	A	A	C	C	G	A
X	+	X+21917570	FBti0057920	EPgy2	CATCCGAG	CAGCATCCGAGCAT		C	A	G	C	A	T	C	C	G	A	G	C	A	T
X	+	X+21919571	FBti0075951	EPgy2	GCTCGAAG	TCGGCTCGAAGTTT		T	C	G	G	C	T	C	G	A	A	G	T	T	T
X	+	X+22257097	FBti0100356	EPgy2	GTCTAGGT	AGCGTCTAGGTTGT		A	G	C	G	T	C	T	A	G	G	T	T	G	T
X	+	X+22346860	FBti0057928	EPgy2	GAAGAGGC	GAGGAAGAGGCTAA		G	A	G	G	A	A	G	A	G	G	C	T	A	A
X	+	X+22421408	FBti0038891	EPgy2	GTCCGGCA	GCTGTCCGGCAGCT		G	C	T	G	T	C	C	G	G	C	A	G	C	T
							Position Count Matrix EPgy2+
						Sum	A	713	376	473	283	212	190	183	525	479	610	136	328	585	506
							C	157	288	323	364	330	722	618	268	204	385	761	464	267	175
							G	196	286	464	784	409	206	253	588	691	344	380	345	311	159
							T	497	613	303	132	612	445	509	182	189	224	286	426	400	723
						Checksum		1563	1563	1563	1563	1563	1563	1563	1563	1563	1563	1563	1563	1563	1563
							Position Frequency Matrix EPgy2+
						Sum	A	45.6174	24.0563	30.2623	18.1062	13.5637	12.1561	11.7083	33.5893	30.6462	39.0275	8.70122	20.9853	37.428	32.3736
							C	10.0448	18.4261	20.6654	23.2885	21.1132	46.1932	39.5393	17.1465	13.0518	24.6321	48.6884	29.6865	17.0825	11.1964
							G	12.54	18.2981	29.6865	50.1599	26.1676	13.1798	16.1868	37.62	44.2099	22.009	24.3122	22.0729	19.8976	10.1727
							T	31.7978	39.2194	19.3858	8.4453	39.1555	28.4709	32.5656	11.6443	12.0921	14.3314	18.2981	27.2553	25.5918	46.2572
						Checksum		100	100	100	100	100	100	100	100	100	100	100	100	100	100

## Sheet: GT1 -
Chromosome	P direction	InsertionSite	PelementFlybaseId	PelementTypes	8 bp repeat	14 bp ins. site		1	2	3	4	5	6	7	8	9	10	11	12	13	14
2L	-	2L-1446735	FBti0017681	GT1	GTGCGAGG	TTCGTGCGAGGGTT		T	T	C	G	T	G	C	G	A	G	G	G	T	T
2L	-	2L-2754560	FBti0017610	GT1	GCACGAAG	TGCGCACGAAGAAT		T	G	C	G	C	A	C	G	A	A	G	A	A	T
2L	-	2L-5000310	FBti0017166	GT1	GGTGTATG	AAAGGTGTATGTTT		A	A	A	G	G	T	G	T	A	T	G	T	T	T
2L	-	2L-7277178	FBti0038678	GT1	TTTCGGGG	ATTTTTCGGGGTCT		A	T	T	T	T	T	C	G	G	G	G	T	C	T
2L	-	2L-8205171	FBti0018573	GT1	CCCAGTGC	ACACCCAGTGCTAT		A	C	A	C	C	C	A	G	T	G	C	T	A	T
2L	-	2L-8299923	FBti0017599	GT1	CCCCAAGC	TCACCCCAAGCCAA		T	C	A	C	C	C	C	A	A	G	C	C	A	A
2L	-	2L-8735833	FBti0017659	GT1	GTGATGGC	TCGGTGATGGCATC		T	C	G	G	T	G	A	T	G	G	C	A	T	C
2L	-	2L-9203791	FBti0018103	GT1	GGCATGGG	ATGGGCATGGGCAT		A	T	G	G	G	C	A	T	G	G	G	C	A	T
2L	-	2L-10329242	FBti0017613	GT1	TGTCAAAC	ATGTGTCAAACTAT		A	T	G	T	G	T	C	A	A	A	C	T	A	T
2L	-	2L-10426046	FBti0021324	GT1	ATCTGAAT	TCTATCTGAATTTA		T	C	T	A	T	C	T	G	A	A	T	T	T	A
2L	-	2L-10968192	FBti0018154	GT1	GTCCCGCC	ACTGTCCCGCCAAA		A	C	T	G	T	C	C	C	G	C	C	A	A	A
2L	-	2L-11517054	FBti0024428	GT1	CTATATAC	ATGCTATATACTGT		A	T	G	C	T	A	T	A	T	A	C	T	G	T
2L	-	2L-11528205	FBti0027599	GT1	CTTTGTCC	TCTCTTTGTCCGTT		T	C	T	C	T	T	T	G	T	C	C	G	T	T
2L	-	2L-12508201	FBti0017626	GT1	GCCCTTAC	CATGCCCTTACTTT		C	A	T	G	C	C	C	T	T	A	C	T	T	T
2L	-	2L-12754697	FBti0018593	GT1	GTCTGTTG	TGGGTCTGTTGCTT		T	G	G	G	T	C	T	G	T	T	G	C	T	T
2L	-	2L-13215163	FBti0018383	GT1	ATGCAAGC	GTGATGCAAGCGTT		G	T	G	A	T	G	C	A	A	G	C	G	T	T
2L	-	2L-13641119	FBti0017741	GT1	GACGGTTC	TAAGACGGTTCCAT		T	A	A	G	A	C	G	G	T	T	C	C	A	T
2L	-	2L-14234117	FBti0017690	GT1	GCCTAATT	ATCGCCTAATTACA		A	T	C	G	C	C	T	A	A	T	T	A	C	A
2L	-	2L-15426275	FBti0018393	GT1	CCCGTGCA	ATACCCGTGCATTA		A	T	A	C	C	C	G	T	G	C	A	T	T	A
2L	-	2L-15751075	FBti0018550	GT1	GGACAGGT	TTAGGACAGGTTCG		T	T	A	G	G	A	C	A	G	G	T	T	C	G
2L	-	2L-16041988	FBti0018351	GT1	TCTGAAAC	GTCTCTGAAACCAT		G	T	C	T	C	T	G	A	A	A	C	C	A	T
2L	-	2L-16352583	FBti0017730	GT1	CTTTAGAT	GTGCTTTAGATATT		G	T	G	C	T	T	T	A	G	A	T	A	T	T
2L	-	2L-16353029	FBti0017205	GT1	CGCTGCAA	AGGCGCTGCAAGCT		A	G	G	C	G	C	T	G	C	A	A	G	C	T
2L	-	2L-17974610	FBti0017647	GT1	GAAATGCA	CTGGAAATGCATGC		C	T	G	G	A	A	A	T	G	C	A	T	G	C
2L	-	2L-18314282	FBti0017596	GT1	AGCTAAAC	AGGAGCTAAACCAG		A	G	G	A	G	C	T	A	A	A	C	C	A	G
2L	-	2L-19136304	FBti0018578	GT1	GCTGTAGC	ATTGCTGTAGCCAC		A	T	T	G	C	T	G	T	A	G	C	C	A	C
2L	-	2L-20917877	FBti0017147	GT1	GGATTGCC	TTGGGATTGCCGTT		T	T	G	G	G	A	T	T	G	C	C	G	T	T
2L	-	2L-21310905	FBti0017141	GT1	GTCCAGTG	ATAGTCCAGTGCGT		A	T	A	G	T	C	C	A	G	T	G	C	G	T
2R	-	2R-2370529	FBti0017630	GT1	CGCAGAGC	AAGCGCAGAGCGAA		A	A	G	C	G	C	A	G	A	G	C	G	A	A
2R	-	2R-2686615	FBti0018367	GT1	ATCCAGGT	TTCATCCAGGTGAA		T	T	C	A	T	C	C	A	G	G	T	G	A	A
2R	-	2R-2859128	FBti0021326	GT1	CCTGTCCG	TCGCCTGTCCGTAG		T	C	G	C	C	T	G	T	C	C	G	T	A	G
2R	-	2R-2969699	FBti0017653	GT1	CACCAAAC	AGGCACCAAACCAA		A	G	G	C	A	C	C	A	A	A	C	C	A	A
2R	-	2R-2969722	FBti0017685	GT1	CCCCAGAG	AAACCCCAGAGCCA		A	A	A	C	C	C	C	A	G	A	G	C	C	A
2R	-	2R-3038167	FBti0017688	GT1	TTATCTTT	TCTTTATCTTTACT		T	C	T	T	T	A	T	C	T	T	T	A	C	T
2R	-	2R-3283421	FBti0018148	GT1	GGTAAGAT	ACAGGTAAGATGTT		A	C	A	G	G	T	A	A	G	A	T	G	T	T
2R	-	2R-3948371	FBti0017611	GT1	GGCGCTGC	AGCGGCGCTGCCGT		A	G	C	G	G	C	G	C	T	G	C	C	G	T
2R	-	2R-4839294	FBti0017733	GT1	GTGTTGGC	TTGGTGTTGGCCAA		T	T	G	G	T	G	T	T	G	G	C	C	A	A
2R	-	2R-5064778	FBti0017693	GT1	GGCGGTGG	ATGGGCGGTGGCCT		A	T	G	G	G	C	G	G	T	G	G	C	C	T
2R	-	2R-5275752	FBti0018112	GT1	GTCAGAAC	AAGGTCAGAACATT		A	A	G	G	T	C	A	G	A	A	C	A	T	T
2R	-	2R-5710522	FBti0018155	GT1	GCCATAGC	ATGGCCATAGCCAT		A	T	G	G	C	C	A	T	A	G	C	C	A	T
2R	-	2R-5997075	FBti0018395	GT1	CCGTAGCC	TTGCCGTAGCCGTT		T	T	G	C	C	G	T	A	G	C	C	G	T	T
2R	-	2R-6613814	FBti0017691	GT1	GTGCCAGC	TGCGTGCCAGCTGT		T	G	C	G	T	G	C	C	A	G	C	T	G	T
2R	-	2R-6741447	FBti0018136	GT1	GGTCGGTC	AGCGGTCGGTCTTT		A	G	C	G	G	T	C	G	G	T	C	T	T	T
2R	-	2R-6903640	FBti0018555	GT1	CGCTCGAC	ACGCGCTCGACGTT		A	C	G	C	G	C	T	C	G	A	C	G	T	T
2R	-	2R-7119591	FBti0017682	GT1	CTTAAGGG	ATGCTTAAGGGCTT		A	T	G	C	T	T	A	A	G	G	G	C	T	T
2R	-	2R-7514322	FBti0018132	GT1	CCGCCGAC	CAACCGCCGACTAT		C	A	A	C	C	G	C	C	G	A	C	T	A	T
2R	-	2R-9497807	FBti0018545	GT1	ATGCAGAG	GTTATGCAGAGCTG		G	T	T	A	T	G	C	A	G	A	G	C	T	G
2R	-	2R-9919138	FBti0018565	GT1	CTCTAAAC	CCACTCTAAACTAA		C	C	A	C	T	C	T	A	A	A	C	T	A	A
2R	-	2R-9961501	FBti0017699	GT1	GTTCACGC	AGAGTTCACGCACT		A	G	A	G	T	T	C	A	C	G	C	A	C	T
2R	-	2R-11101085	FBti0021325	GT1	TCCAGGAT	TTGTCCAGGATTCT		T	T	G	T	C	C	A	G	G	A	T	T	C	T
2R	-	2R-11259037	FBti0017619	GT1	GCCTAAAG	TTTGCCTAAAGAAT		T	T	T	G	C	C	T	A	A	A	G	A	A	T
2R	-	2R-14059060	FBti0017158	GT1	ATCTCGAC	TTGATCTCGACCGA		T	T	G	A	T	C	T	C	G	A	C	C	G	A
2R	-	2R-14292809	FBti0018144	GT1	GGCGAAAT	TTGGGCGAAATTTA		T	T	G	G	G	C	G	A	A	A	T	T	T	A
2R	-	2R-16894336	FBti0018355	GT1	GCCAGTGG	TAGGCCAGTGGATC		T	A	G	G	C	C	A	G	T	G	G	A	T	C
2R	-	2R-16921747	FBti0017760	GT1	CACGCAAC	ACGCACGCAACTGC		A	C	G	C	A	C	G	C	A	A	C	T	G	C
2R	-	2R-16989264	FBti0018157	GT1	CCCTACAC	AACCCCTACACAAT		A	A	C	C	C	C	T	A	C	A	C	A	A	T
2R	-	2R-17506563	FBti0017210	GT1	AGACCGAG	AGAAGACCGAGTTT		A	G	A	A	G	A	C	C	G	A	G	T	T	T
2R	-	2R-18014932	FBti0021309	GT1	GTACATCG	TTTGTACATCGCTA		T	T	T	G	T	A	C	A	T	C	G	C	T	A
2R	-	2R-18205173	FBti0018535	GT1	CTCCATGG	TTGCTCCATGGGGA		T	T	G	C	T	C	C	A	T	G	G	G	G	A
2R	-	2R-18457325	FBti0017672	GT1	GCCTAACT	TTAGCCTAACTAAT		T	T	A	G	C	C	T	A	A	C	T	A	A	T
2R	-	2R-18621464	FBti0018561	GT1	GTTCAGAT	TACGTTCAGATCAA		T	A	C	G	T	T	C	A	G	A	T	C	A	A
2R	-	2R-19502469	FBti0017656	GT1	TAAATGCA	TTGTAAATGCAATA		T	T	G	T	A	A	A	T	G	C	A	A	T	A
2R	-	2R-19601428	FBti0017591	GT1	TTTTGGGG	AGATTTTGGGGAAT		A	G	A	T	T	T	T	G	G	G	G	A	A	T
3L	-	3L-93057	FBti0017146	GT1	AGCTATGC	ATAAGCTATGCAAT		A	T	A	A	G	C	T	A	T	G	C	A	A	T
3L	-	3L-131809	FBti0021321	GT1	TTCGCCCA	GTGTTCGCCCATTA		G	T	G	T	T	C	G	C	C	C	A	T	T	A
3L	-	3L-546799	FBti0018078	GT1	ATCTGGGC	GCAATCTGGGCGCT		G	C	A	A	T	C	T	G	G	G	C	G	C	T
3L	-	3L-702653	FBti0018602	GT1	CGCCGATC	AACCGCCGATCCAT		A	A	C	C	G	C	C	G	A	T	C	C	A	T
3L	-	3L-739117	FBti0017650	GT1	GCGCAGGC	CGTGCGCAGGCAGT		C	G	T	G	C	G	C	A	G	G	C	A	G	T
3L	-	3L-1248056	FBti0018121	GT1	AAACAATC	AAAAAACAATCGAC		A	A	A	A	A	A	C	A	A	T	C	G	A	C
3L	-	3L-1577331	FBti0017598	GT1	TCGTGAAA	CAGTCGTGAAATAT		C	A	G	T	C	G	T	G	A	A	A	T	A	T
3L	-	3L-2418021	FBti0017719	GT1	CACGGGAC	ACACACGGGACTAC		A	C	A	C	A	C	G	G	G	A	C	T	A	C
3L	-	3L-2554332	FBti0018403	GT1	AAACGAGC	TTAAAACGAGCCTC		T	T	A	A	A	A	C	G	A	G	C	C	T	C
3L	-	3L-3143419	FBti0018354	GT1	TATCCAAA	AAATATCCAAACGT		A	A	A	T	A	T	C	C	A	A	A	C	G	T
3L	-	3L-3146271	FBti0017187	GT1	GCCCAGCG	ATGGCCCAGCGTTT		A	T	G	G	C	C	C	A	G	C	G	T	T	T
3L	-	3L-5268904	FBti0017728	GT1	GCTGGGAT	TTGGCTGGGATATT		T	T	G	G	C	T	G	G	G	A	T	A	T	T
3L	-	3L-5271063	FBti0017753	GT1	GTACATTG	TTAGTACATTGACT		T	T	A	G	T	A	C	A	T	T	G	A	C	T
3L	-	3L-5271070	FBti0017173	GT1	ACTCACTC	CGCACTCACTCGAC		C	G	C	A	C	T	C	A	C	T	C	G	A	C
3L	-	3L-6957734	FBti0018152	GT1	GTTTTACT	TTCGTTTTACTGTT		T	T	C	G	T	T	T	T	A	C	T	G	T	T
3L	-	3L-7803014	FBti0017702	GT1	GGCCAGGT	TTGGGCCAGGTCAA		T	T	G	G	G	C	C	A	G	G	T	C	A	A
3L	-	3L-8049480	FBti0018093	GT1	CGTCAGAA	AGCCGTCAGAATGT		A	G	C	C	G	T	C	A	G	A	A	T	G	T
3L	-	3L-8946356	FBti0018559	GT1	GGGCGGAC	TAGGGGCGGACTTT		T	A	G	G	G	G	C	G	G	A	C	T	T	T
3L	-	3L-10672162	FBti0017160	GT1	GCCGTGGC	TTGGCCGTGGCTCT		T	T	G	G	C	C	G	T	G	G	C	T	C	T
3L	-	3L-10892245	FBti0017181	GT1	GTCCCAAA	GCAGTCCCAAACAG		G	C	A	G	T	C	C	C	A	A	A	C	A	G
3L	-	3L-11111636	FBti0021307	GT1	GGGGGGAC	TAAGGGGGGACGAA		T	A	A	G	G	G	G	G	G	A	C	G	A	A
3L	-	3L-11289052	FBti0017747	GT1	GTCCAGAA	TTGGTCCAGAAAGA		T	T	G	G	T	C	C	A	G	A	A	A	G	A
3L	-	3L-11815095	FBti0017588	GT1	ATTGAGTC	CGAATTGAGTCTGC		C	G	A	A	T	T	G	A	G	T	C	T	G	C
3L	-	3L-12836223	FBti0017578	GT1	ATTTTTAC	TTTATTTTTACGTA		T	T	T	A	T	T	T	T	T	A	C	G	T	A
3L	-	3L-13221688	FBti0018540	GT1	AACTGTTC	TTGAACTGTTCTAC		T	T	G	A	A	C	T	G	T	T	C	T	A	C
3L	-	3L-14544048	FBti0017734	GT1	GGCGAAAC	GTGGGCGAAACTGT		G	T	G	G	G	C	G	A	A	A	C	T	G	T
3L	-	3L-14544422	FBti0018594	GT1	GATAAAAT	AGGGATAAAATCAT		A	G	G	G	A	T	A	A	A	A	T	C	A	T
3L	-	3L-14625140	FBti0017664	GT1	CGTTGGCG	TGACGTTGGCGTAC		T	G	A	C	G	T	T	G	G	C	G	T	A	C
3L	-	3L-14966441	FBti0017646	GT1	AGCTCACA	GCTAGCTCACAGCA		G	C	T	A	G	C	T	C	A	C	A	G	C	A
3L	-	3L-15027426	FBti0017683	GT1	CTTTTGGT	TTGCTTTTGGTGTT		T	T	G	C	T	T	T	T	G	G	T	G	T	T
3L	-	3L-15240522	FBti0017706	GT1	GTCCCACG	CGAGTCCCACGGCT		C	G	A	G	T	C	C	C	A	C	G	G	C	T
3L	-	3L-15759693	FBti0018146	GT1	GCAGTACC	GGAGCAGTACCTAT		G	G	A	G	C	A	G	T	A	C	C	T	A	T
3L	-	3L-16105469	FBti0018571	GT1	GTGCAGAA	GCGGTGCAGAATAT		G	C	G	G	T	G	C	A	G	A	A	T	A	T
3L	-	3L-16401504	FBti0017182	GT1	CATCCGAC	ATCCATCCGACCGC		A	T	C	C	A	T	C	C	G	A	C	C	G	C
3L	-	3L-16846903	FBti0018570	GT1	TTCCACTC	CTCTTCCACTCCCA		C	T	C	T	T	C	C	A	C	T	C	C	C	A
3L	-	3L-17480615	FBti0017171	GT1	GTTTCGGG	TTGGTTTCGGGGCT		T	T	G	G	T	T	T	C	G	G	G	G	C	T
3L	-	3L-17570899	FBti0017651	GT1	GTTCAACC	TCGGTTCAACCCAT		T	C	G	G	T	T	C	A	A	C	C	C	A	T
3L	-	3L-17964339	FBti0018568	GT1	AGTAGGGG	GATAGTAGGGGGTG		G	A	T	A	G	T	A	G	G	G	G	G	T	G
3L	-	3L-18057995	FBti0017639	GT1	GCATGGTC	TTGGCATGGTCTGA		T	T	G	G	C	A	T	G	G	T	C	T	G	A
3L	-	3L-18634012	FBti0017201	GT1	CGCCAGAG	TCGCGCCAGAGCAA		T	C	G	C	G	C	C	A	G	A	G	C	A	A
3L	-	3L-18716037	FBti0017669	GT1	AGTGTATC	AAAAGTGTATCTAC		A	A	A	A	G	T	G	T	A	T	C	T	A	C
3L	-	3L-18764815	FBti0021312	GT1	CGCACCCC	TGCCGCACCCCGCT		T	G	C	C	G	C	A	C	C	C	C	G	C	T
3L	-	3L-19287987	FBti0017676	GT1	GTAGGAGC	ACGGTAGGAGCCAT		A	C	G	G	T	A	G	G	A	G	C	C	A	T
3L	-	3L-19475200	FBti0018115	GT1	GGTCCACC	AATGGTCCACCTAA		A	A	T	G	G	T	C	C	A	C	C	T	A	A
3L	-	3L-19854808	FBti0017636	GT1	GGACGAGG	TTCGGACGAGGAGA		T	T	C	G	G	A	C	G	A	G	G	A	G	A
3L	-	3L-19985020	FBti0017689	GT1	GCCTACGA	ATGGCCTACGATTG		A	T	G	G	C	C	T	A	C	G	A	T	T	G
3L	-	3L-20778614	FBti0018566	GT1	GTTTGTTG	TTAGTTTGTTGGCT		T	T	A	G	T	T	T	G	T	T	G	G	C	T
3L	-	3L-21165284	FBti0018090	GT1	ACTTGGAC	TGGACTTGGACTGA		T	G	G	A	C	T	T	G	G	A	C	T	G	A
3L	-	3L-21427038	FBti0017202	GT1	GTTTGGAG	CACGTTTGGAGCTT		C	A	C	G	T	T	T	G	G	A	G	C	T	T
3L	-	3L-22817754	FBti0017627	GT1	GAGCAGAG	TTGGAGCAGAGGCA		T	T	G	G	A	G	C	A	G	A	G	G	C	A
3R	-	3R-223611	FBti0018376	GT1	CCCCAATG	ATACCCCAATGTTG		A	T	A	C	C	C	C	A	A	T	G	T	T	G
3R	-	3R-336822	FBti0018388	GT1	GAGTAAGC	TTGGAGTAAGCAAA		T	T	G	G	A	G	T	A	A	G	C	A	A	A
3R	-	3R-912903	FBti0018350	GT1	AGCCAGCG	AGCAGCCAGCGTCA		A	G	C	A	G	C	C	A	G	C	G	T	C	A
3R	-	3R-1042150	FBti0017625	GT1	TGCTGAAT	ACGTGCTGAATAAA		A	C	G	T	G	C	T	G	A	A	T	A	A	A
3R	-	3R-2232604	FBti0018075	GT1	CCAAAAGC	GATCCAAAAGCCAA		G	A	T	C	C	A	A	A	A	G	C	C	A	A
3R	-	3R-2935323	FBti0018128	GT1	GGACCCAC	TGTGGACCCACCAC		T	G	T	G	G	A	C	C	C	A	C	C	A	C
3R	-	3R-3732998	FBti0018549	GT1	CTACAGGC	ATTCTACAGGCACA		A	T	T	C	T	A	C	A	G	G	C	A	C	A
3R	-	3R-3737500	FBti0018564	GT1	GTGCCGCC	CTGGTGCCGCCCAC		C	T	G	G	T	G	C	C	G	C	C	C	A	C
3R	-	3R-4625853	FBti0017580	GT1	TAATCGAG	ATATAATCGAGCGG		A	T	A	T	A	A	T	C	G	A	G	C	G	G
3R	-	3R-4638336	FBti0017606	GT1	ACATAGAC	AAAACATAGACCTT		A	A	A	A	C	A	T	A	G	A	C	C	T	T
3R	-	3R-5456519	FBti0021319	GT1	GACTGATG	AGTGACTGATGGAT		A	G	T	G	A	C	T	G	A	T	G	G	A	T
3R	-	3R-5700371	FBti0017670	GT1	GCAGAGAG	AAAGCAGAGAGTGA		A	A	A	G	C	A	G	A	G	A	G	T	G	A
3R	-	3R-6973344	FBti0017615	GT1	GATTCGCT	ATGGATTCGCTGTT		A	T	G	G	A	T	T	C	G	C	T	G	T	T
3R	-	3R-8196570	FBti0018599	GT1	GGTGAGAG	TAGGGTGAGAGCGA		T	A	G	G	G	T	G	A	G	A	G	C	G	A
3R	-	3R-8800223	FBti0017600	GT1	CATCAGAC	AGACATCAGACTTA		A	G	A	C	A	T	C	A	G	A	C	T	T	A
3R	-	3R-9291878	FBti0018401	GT1	GGTTGGAG	TTTGGTTGGAGGCA		T	T	T	G	G	T	T	G	G	A	G	G	C	A
3R	-	3R-9486226	FBti0018582	GT1	GGCCAACA	AAGGGCCAACAATA		A	A	G	G	G	C	C	A	A	C	A	A	T	A
3R	-	3R-9850514	FBti0017165	GT1	GGATGGGG	ATAGGATGGGGAAT		A	T	A	G	G	A	T	G	G	G	G	A	A	T
3R	-	3R-10198828	FBti0018156	GT1	TCAACAGA	ATGTCAACAGAAAT		A	T	G	T	C	A	A	C	A	G	A	A	A	T
3R	-	3R-10812117	FBti0017674	GT1	CTGTGGCA	CTACTGTGGCACAA		C	T	A	C	T	G	T	G	G	C	A	C	A	A
3R	-	3R-10902878	FBti0017755	GT1	CGAGAGCC	CTGCGAGAGCCTCA		C	T	G	C	G	A	G	A	G	C	C	T	C	A
3R	-	3R-12076012	FBti0018099	GT1	CGTTCGGG	AAACGTTCGGGCTT		A	A	A	C	G	T	T	C	G	G	G	C	T	T
3R	-	3R-13769785	FBti0018591	GT1	GCATAGTC	AAAGCATAGTCCCG		A	A	A	G	C	A	T	A	G	T	C	C	C	G
3R	-	3R-13875135	FBti0021308	GT1	GTCAACAT	AGCGTCAACATTAA		A	G	C	G	T	C	A	A	C	A	T	T	A	A
3R	-	3R-14009161	FBti0017750	GT1	GCTGGCAA	AAGGCTGGCAACAA		A	A	G	G	C	T	G	G	C	A	A	C	A	A
3R	-	3R-14809855	FBti0018149	GT1	ATCGACGT	CTCATCGACGTCAT		C	T	C	A	T	C	G	A	C	G	T	C	A	T
3R	-	3R-16923541	FBti0017154	GT1	AGCTCTGA	GTTAGCTCTGATTC		G	T	T	A	G	C	T	C	T	G	A	T	T	C
3R	-	3R-17690964	FBti0017161	GT1	GAGCAAAG	AACGAGCAAAGCGA		A	A	C	G	A	G	C	A	A	A	G	C	G	A
3R	-	3R-17959928	FBti0018349	GT1	CTTCACAG	AGGCTTCACAGTAA		A	G	G	C	T	T	C	A	C	A	G	T	A	A
3R	-	3R-18363648	FBti0017729	GT1	GATTCATT	AGAGATTCATTCAT		A	G	A	G	A	T	T	C	A	T	T	C	A	T
3R	-	3R-19171888	FBti0018368	GT1	GTGTGTGC	ACTGTGTGTGCCAT		A	C	T	G	T	G	T	G	T	G	C	C	A	T
3R	-	3R-19934662	FBti0017635	GT1	GGCCGTGG	GAGGGCCGTGGACG		G	A	G	G	G	C	C	G	T	G	G	A	C	G
3R	-	3R-20593738	FBti0017697	GT1	GATTGTCC	AAGGATTGTCCCAA		A	A	G	G	A	T	T	G	T	C	C	C	A	A
3R	-	3R-20938302	FBti0018125	GT1	GCTGCGGG	ATCGCTGCGGGTTT		A	T	C	G	C	T	G	C	G	G	G	T	T	T
3R	-	3R-23773705	FBti0018364	GT1	ATTGCAGT	ATAATTGCAGTGCT		A	T	A	A	T	T	G	C	A	G	T	G	C	T
3R	-	3R-26107004	FBti0017151	GT1	AGCCGGCC	GTAAGCCGGCCGGT		G	T	A	A	G	C	C	G	G	C	C	G	G	T
3R	-	3R-27095039	FBti0017167	GT1	CTCTGCAC	CTGCTCTGCACAGA		C	T	G	C	T	C	T	G	C	A	C	A	G	A
X	-	X-158082	FBti0017624	GT1	CATTGGGG	CGCCATTGGGGAGA		C	G	C	C	A	T	T	G	G	G	G	A	G	A
X	-	X-200294	FBti0018358	GT1	CCCCAATG	ATGCCCCAATGGTT		A	T	G	C	C	C	C	A	A	T	G	G	T	T
X	-	X-513568	FBti0021305	GT1	CAGAGTTA	CACCAGAGTTATCA		C	A	C	C	A	G	A	G	T	T	A	T	C	A
X	-	X-613498	FBti0017168	GT1	CTCCCACG	AAGCTCCCACGCTG		A	A	G	C	T	C	C	C	A	C	G	C	T	G
X	-	X-1372660	FBti0017712	GT1	AACAGAAC	GCGAACAGAACGAA		G	C	G	A	A	C	A	G	A	A	C	G	A	A
X	-	X-1855509	FBti0017209	GT1	TTCTCGGT	AAGTTCTCGGTTAA		A	A	G	T	T	C	T	C	G	G	T	T	A	A
X	-	X-1857945	FBti0017208	GT1	GCACAGCC	ACAGCACAGCCCAT		A	C	A	G	C	A	C	A	G	C	C	C	A	T
X	-	X-2017349	FBti0017680	GT1	GCCGTGCC	TGTGCCGTGCCATT		T	G	T	G	C	C	G	T	G	C	C	A	T	T
X	-	X-2200397	FBti0017678	GT1	ATCCCCAC	ATTATCCCCACACT		A	T	T	A	T	C	C	C	C	A	C	A	C	T
X	-	X-2211814	FBti0017667	GT1	GTTCAAAC	TCAGTTCAAACTAG		T	C	A	G	T	T	C	A	A	A	C	T	A	G
X	-	X-2471625	FBti0018397	GT1	GGGCGGAT	AAGGGGCGGATAAG		A	A	G	G	G	G	C	G	G	A	T	A	A	G
X	-	X-3598009	FBti0018377	GT1	GGGCATAC	TCGGGGCATACAGA		T	C	G	G	G	G	C	A	T	A	C	A	G	A
X	-	X-3638832	FBti0021327	GT1	ATGGGTAT	GTAATGGGTATTAT		G	T	A	A	T	G	G	G	T	A	T	T	A	T
X	-	X-3774878	FBti0018547	GT1	GACAATTT	ACCGACAATTTATT		A	C	C	G	A	C	A	A	T	T	T	A	T	T
X	-	X-4098138	FBti0021304	GT1	TGCCCTGG	CTATGCCCTGGCAT		C	T	A	T	G	C	C	C	T	G	G	C	A	T
X	-	X-4595222	FBti0017666	GT1	TGGACAGC	CAATGGACAGCAGT		C	A	A	T	G	G	A	C	A	G	C	A	G	T
X	-	X-4615266	FBti0017585	GT1	GCTCAGTC	GAAGCTCAGTCTCA		G	A	A	G	C	T	C	A	G	T	C	T	C	A
X	-	X-4930243	FBti0017698	GT1	CTATCCAC	TCCCTATCCACAAT		T	C	C	C	T	A	T	C	C	A	C	A	A	T
X	-	X-4976972	FBti0018537	GT1	CTGCAGAG	CTGCTGCAGAGCTT		C	T	G	C	T	G	C	A	G	A	G	C	T	T
X	-	X-5971549	FBti0017709	GT1	CGGGGAAC	ACACGGGGAACGTT		A	C	A	C	G	G	G	G	A	A	C	G	T	T
X	-	X-6161160	FBti0018603	GT1	GACTGCAG	TACGACTGCAGCTT		T	A	C	G	A	C	T	G	C	A	G	C	T	T
X	-	X-6177706	FBti0021322	GT1	GCCTGTGC	ACGGCCTGTGCATT		A	C	G	G	C	C	T	G	T	G	C	A	T	T
X	-	X-6496216	FBti0017189	GT1	CGCTGCTC	ATCCGCTGCTCAAT		A	T	C	C	G	C	T	G	C	T	C	A	A	T
X	-	X-6594888	FBti0017602	GT1	GGCAGTAC	TTAGGCAGTACCTT		T	T	A	G	G	C	A	G	T	A	C	C	T	T
X	-	X-6625127	FBti0018089	GT1	TTCCCTTC	GTGTTCCCTTCCTA		G	T	G	T	T	C	C	C	T	T	C	C	T	A
X	-	X-6737492	FBti0018361	GT1	ATGGAGAA	TCGATGGAGAAACA		T	C	G	A	T	G	G	A	G	A	A	A	C	A
X	-	X-6892919	FBti0018563	GT1	GGTCGCAC	GTAGGTCGCACGAG		G	T	A	G	G	T	C	G	C	A	C	G	A	G
X	-	X-6998487	FBti0018141	GT1	GGCTGAAC	AAAGGCTGAACAAG		A	A	A	G	G	C	T	G	A	A	C	A	A	G
X	-	X-7200292	FBti0018077	GT1	CGTCAGCC	CTACGTCAGCCTTT		C	T	A	C	G	T	C	A	G	C	C	T	T	T
X	-	X-7492184	FBti0017138	GT1	CCCCAGAG	TTCCCCCAGAGTTT		T	T	C	C	C	C	C	A	G	A	G	T	T	T
X	-	X-7825402	FBti0017731	GT1	GTTAGTGC	TTGGTTAGTGCGGA		T	T	G	G	T	T	A	G	T	G	C	G	G	A
X	-	X-8615370	FBti0018569	GT1	GTCAACAG	ATAGTCAACAGAGA		A	T	A	G	T	C	A	A	C	A	G	A	G	A
X	-	X-8788265	FBti0017739	GT1	CAGACGGC	TAGCAGACGGCTGT		T	A	G	C	A	G	A	C	G	G	C	T	G	T
X	-	X-9964664	FBti0017594	GT1	GGCCAGCA	CTGGGCCAGCAGCA		C	T	G	G	G	C	C	A	G	C	A	G	C	A
X	-	X-10105699	FBti0018356	GT1	CTCTTAAT	AAGCTCTTAATCTG		A	A	G	C	T	C	T	T	A	A	T	C	T	G
X	-	X-10260292	FBti0017579	GT1	GGCTATCG	TTGGGCTATCGTTA		T	T	G	G	G	C	T	A	T	C	G	T	T	A
X	-	X-10349019	FBti0021330	GT1	CGTGCACT	CACCGTGCACTTTC		C	A	C	C	G	T	G	C	A	C	T	T	T	C
X	-	X-10658265	FBti0017711	GT1	TCTTGGCC	GCGTCTTGGCCCCT		G	C	G	T	C	T	T	G	G	C	C	C	C	T
X	-	X-11389266	FBti0017185	GT1	AACCAAAC	AATAACCAAACGAT		A	A	T	A	A	C	C	A	A	A	C	G	A	T
X	-	X-11685646	FBti0018402	GT1	GTCGAGCG	GTTGTCGAGCGGAA		G	T	T	G	T	C	G	A	G	C	G	G	A	A
X	-	X-11691214	FBti0018120	GT1	CACGGGTG	GTACACGGGTGTTA		G	T	A	C	A	C	G	G	G	T	G	T	T	A
X	-	X-11816733	FBti0017645	GT1	GGTGCGGC	ACAGGTGCGGCCGA		A	C	A	G	G	T	G	C	G	G	C	C	G	A
X	-	X-12440991	FBti0018385	GT1	GACTGGAT	CGGGACTGGATGCA		C	G	G	G	A	C	T	G	G	A	T	G	C	A
X	-	X-12625129	FBti0021310	GT1	CTCTTGAC	AATCTCTTGACCAA		A	A	T	C	T	C	T	T	G	A	C	C	A	A
X	-	X-12639334	FBti0018108	GT1	GAAACTTA	ACTGAAACTTATTT		A	C	T	G	A	A	A	C	T	T	A	T	T	T
X	-	X-12645915	FBti0017601	GT1	GTACGGAC	GGGGTACGGACCCC		G	G	G	G	T	A	C	G	G	A	C	C	C	C
X	-	X-12803615	FBti0017213	GT1	CATCAGCC	AGCCATCAGCCCAA		A	G	C	C	A	T	C	A	G	C	C	C	A	A
X	-	X-13880747	FBti0017732	GT1	AGTTGAAA	TACAGTTGAAACAT		T	A	C	A	G	T	T	G	A	A	A	C	A	T
X	-	X-14485660	FBti0017190	GT1	CCTGGGAC	CAGCCTGGGACGAT		C	A	G	C	C	T	G	G	G	A	C	G	A	T
X	-	X-14703608	FBti0018352	GT1	CTGCAAAG	CGCCTGCAAAGGAT		C	G	C	C	T	G	C	A	A	A	G	G	A	T
X	-	X-14790944	FBti0021306	GT1	TACCAGCA	AAGTACCAGCACTG		A	A	G	T	A	C	C	A	G	C	A	C	T	G
X	-	X-14844772	FBti0018150	GT1	CCTTCGCC	TCGCCTTCGCCTCA		T	C	G	C	C	T	T	C	G	C	C	T	C	A
X	-	X-14956893	FBti0018421	GT1	GTATATCC	AACGTATATCCCCT		A	A	C	G	T	A	T	A	T	C	C	C	C	T
X	-	X-15021376	FBti0018105	GT1	GCCACTTT	TTGGCCACTTTAAA		T	T	G	G	C	C	A	C	T	T	T	A	A	A
X	-	X-15073208	FBti0017139	GT1	GGCCGCCC	ACTGGCCGCCCCCT		A	C	T	G	G	C	C	G	C	C	C	C	C	T
X	-	X-15336652	FBti0018369	GT1	GCTTGAGT	AAAGCTTGAGTCAT		A	A	A	G	C	T	T	G	A	G	T	C	A	T
X	-	X-15728830	FBti0017743	GT1	GCGTGCTT	ATAGCGTGCTTCTT		A	T	A	G	C	G	T	G	C	T	T	C	T	T
X	-	X-16862632	FBti0018411	GT1	CGAATACG	GACCGAATACGAAA		G	A	C	C	G	A	A	T	A	C	G	A	A	A
X	-	X-17230386	FBti0017196	GT1	GGCGGCAT	ACAGGCGGCATTAT		A	C	A	G	G	C	G	G	C	A	T	T	A	T
X	-	X-17335593	FBti0018589	GT1	AGCTGGCT	AACAGCTGGCTATG		A	A	C	A	G	C	T	G	G	C	T	A	T	G
X	-	X-17455860	FBti0017629	GT1	CGCTGGGA	TTCCGCTGGGACAA		T	T	C	C	G	C	T	G	G	G	A	C	A	A
X	-	X-17711354	FBti0018539	GT1	GCGTGCCC	TTGGCGTGCCCAAA		T	T	G	G	C	G	T	G	C	C	C	A	A	A
X	-	X-18399362	FBti0017169	GT1	GGGGAAAA	AATGGGGAAAACGT		A	A	T	G	G	G	G	A	A	A	A	C	G	T
X	-	X-19319157	FBti0017744	GT1	GTGCGTGT	ATAGTGCGTGTGAT		A	T	A	G	T	G	C	G	T	G	T	G	A	T
X	-	X-19392419	FBti0018596	GT1	GTTTCGGG	ATCGTTTCGGGTCC		A	T	C	G	T	T	T	C	G	G	G	T	C	C
X	-	X-20360918	FBti0018400	GT1	GTTCAGGC	TAAGTTCAGGCGAT		T	A	A	G	T	T	C	A	G	G	C	G	A	T
X	-	X-20958794	FBti0017726	GT1	GGCTGGAC	GTGGGCTGGACTAC		G	T	G	G	G	C	T	G	G	A	C	T	A	C
X	-	X-21502538	FBti0024429	GT1	CCCTGATT	AAGCCCTGATTGCT		A	A	G	C	C	C	T	G	A	T	T	G	C	T
X	-	X-21962068	FBti0017597	GT1	GCCCGTGG	ATAGCCCGTGGTTA		A	T	A	G	C	C	C	G	T	G	G	T	T	A
X	-	X-22382797	FBti0017206	GT1	GCGCGGTG	TTCGCGCGGTGCCT		T	T	C	G	C	G	C	G	G	T	G	C	C	T
							Position Count Matrix GT-
						Sum	A	96	54	62	32	33	32	29	81	64	83	26	45	85	72
							C	27	37	41	58	52	94	80	42	25	45	100	68	40	21
							G	27	34	87	110	64	34	38	75	95	59	58	44	32	19
							T	70	95	30	20	71	60	73	22	36	33	36	63	63	108
						Checksum		220	220	220	220	220	220	220	220	220	220	220	220	220	220
							Position Frequency Matrix GT-
						Sum	A	43.6364	24.5455	28.1818	14.5455	15	14.5455	13.1818	36.8182	29.0909	37.7273	11.8182	20.4545	38.6364	32.7273
							C	12.2727	16.8182	18.6364	26.3636	23.6364	42.7273	36.3636	19.0909	11.3636	20.4545	45.4545	30.9091	18.1818	9.54545
							G	12.2727	15.4545	39.5455	50	29.0909	15.4545	17.2727	34.0909	43.1818	26.8182	26.3636	20	14.5455	8.63636
							T	31.8182	43.1818	13.6364	9.09091	32.2727	27.2727	33.1818	10	16.3636	15	16.3636	28.6364	28.6364	49.0909
						Checksum		100	100	100	100	100	100	100	100	100	100	100	100	100	100

## Sheet: GT1 +
Chromosome	P direction	InsertionSite	PelementFlybaseId	PelementTypes	8 bp repeat	14 bp ins. site		1	2	3	4	5	6	7	8	9	10	11	12	13	14
2L	+	2L+95428	FBti0017152	GT1	AGACGGAC	ATAAGACGGACACT		A	T	A	A	G	A	C	G	G	A	C	A	C	T
2L	+	2L+225444	FBti0018098	GT1	CACCAGAG	AAGCACCAGAGATC		A	A	G	C	A	C	C	A	G	A	G	A	T	C
2L	+	2L+479689	FBti0018574	GT1	ATCCACAC	ATCATCCACACGCC		A	T	C	A	T	C	C	A	C	A	C	G	C	C
2L	+	2L+851008	FBti0018413	GT1	TGACAAGC	AAGTGACAAGCCAA		A	A	G	T	G	A	C	A	A	G	C	C	A	A
2L	+	2L+870481	FBti0017641	GT1	CAATGAGC	AGTCAATGAGCCAT		A	G	T	C	A	A	T	G	A	G	C	C	A	T
2L	+	2L+1724344	FBti0017671	GT1	GTTCAGAC	AAGGTTCAGACTAT		A	A	G	G	T	T	C	A	G	A	C	T	A	T
2L	+	2L+2197115	FBti0017757	GT1	ATTCAGCT	CACATTCAGCTGTT		C	A	C	A	T	T	C	A	G	C	T	G	T	T
2L	+	2L+2381165	FBti0017582	GT1	ATAAGTAC	GCGATAAGTACGTT		G	C	G	A	T	A	A	G	T	A	C	G	T	T
2L	+	2L+2907784	FBti0017665	GT1	ATTCGGAG	TCGATTCGGAGGGA		T	C	G	A	T	T	C	G	G	A	G	G	G	A
2L	+	2L+2958943	FBti0018586	GT1	GGCCCAAG	GGCGGCCCAAGCTG		G	G	C	G	G	C	C	C	A	A	G	C	T	G
2L	+	2L+3086527	FBti0018548	GT1	GGTTGTGC	CGTGGTTGTGCAAA		C	G	T	G	G	T	T	G	T	G	C	A	A	A
2L	+	2L+3862694	FBti0017193	GT1	CTCTGACA	TTGCTCTGACATAT		T	T	G	C	T	C	T	G	A	C	A	T	A	T
2L	+	2L+3978606	FBti0018101	GT1	GCCTAGTT	ACGGCCTAGTTGAA		A	C	G	G	C	C	T	A	G	T	T	G	A	A
2L	+	2L+4577825	FBti0018091	GT1	GTCGCCCC	TCAGTCGCCCCCCA		T	C	A	G	T	C	G	C	C	C	C	C	C	A
2L	+	2L+5554813	FBti0017652	GT1	CCCCAATC	ACTCCCCAATCTGT		A	C	T	C	C	C	C	A	A	T	C	T	G	T
2L	+	2L+7084782	FBti0017710	GT1	TAGGCAAA	CATTAGGCAAACTT		C	A	T	T	A	G	G	C	A	A	A	C	T	T
2L	+	2L+7418622	FBti0017701	GT1	GCTCCGCC	GTCGCTCCGCCGCC		G	T	C	G	C	T	C	C	G	C	C	G	C	C
2L	+	2L+7530592	FBti0018131	GT1	GAAAGGAT	AAGGAAAGGATAGA		A	A	G	G	A	A	A	G	G	A	T	A	G	A
2L	+	2L+9125767	FBti0018133	GT1	GTCAGGTC	TTGGTCAGGTCGCC		T	T	G	G	T	C	A	G	G	T	C	G	C	C
2L	+	2L+9183993	FBti0018576	GT1	ATTTATTT	CAAATTTATTTCGT		C	A	A	A	T	T	T	A	T	T	T	C	G	T
2L	+	2L+9613333	FBti0018590	GT1	CTGCCAGG	CTACTGCCAGGTAT		C	T	A	C	T	G	C	C	A	G	G	T	A	T
2L	+	2L+9634152	FBti0018407	GT1	GGCTTGGC	TGCGGCTTGGCCAT		T	G	C	G	G	C	T	T	G	G	C	C	A	T
2L	+	2L+9699218	FBti0018116	GT1	CCCTCAGC	CTTCCCTCAGCGCT		C	T	T	C	C	C	T	C	A	G	C	G	C	T
2L	+	2L+10255891	FBti0018137	GT1	GCTGAGAG	TCAGCTGAGAGCAA		T	C	A	G	C	T	G	A	G	A	G	C	A	A
2L	+	2L+10339483	FBti0024425	GT1	GGCCCACT	AGCGGCCCACTCAT		A	G	C	G	G	C	C	C	A	C	T	C	A	T
2L	+	2L+10388153	FBti0017170	GT1	ACCAAATT	TCGACCAAATTGCA		T	C	G	A	C	C	A	A	A	T	T	G	C	A
2L	+	2L+10685916	FBti0017746	GT1	ATTTGGCG	ACGATTTGGCGGTT		A	C	G	A	T	T	T	G	G	C	G	G	T	T
2L	+	2L+11207048	FBti0017175	GT1	GTCCAAAT	ATTGTCCAAATGCA		A	T	T	G	T	C	C	A	A	A	T	G	C	A
2L	+	2L+11581353	FBti0018374	GT1	CCGTGAAG	AGACCGTGAAGCAG		A	G	A	C	C	G	T	G	A	A	G	C	A	G
2L	+	2L+11952697	FBti0017137	GT1	GCTTCAAC	AATGCTTCAACGCT		A	A	T	G	C	T	T	C	A	A	C	G	C	T
2L	+	2L+12007246	FBti0018419	GT1	CTGCTACC	TAGCTGCTACCCTT		T	A	G	C	T	G	C	T	A	C	C	C	T	T
2L	+	2L+12216532	FBti0017623	GT1	TTCCGCAC	TCATTCCGCACGGA		T	C	A	T	T	C	C	G	C	A	C	G	G	A
2L	+	2L+14014153	FBti0018085	GT1	AATTGGAG	TTGAATTGGAGTGA		T	T	G	A	A	T	T	G	G	A	G	T	G	A
2L	+	2L+14274759	FBti0017700	GT1	TCACAGAC	TTCTCACAGACCGT		T	T	C	T	C	A	C	A	G	A	C	C	G	T
2L	+	2L+14358549	FBti0017200	GT1	GTGCAGCG	AACGTGCAGCGGTA		A	A	C	G	T	G	C	A	G	C	G	G	T	A
2L	+	2L+14616349	FBti0018409	GT1	GGCTTGTG	AAAGGCTTGTGGAT		A	A	A	G	G	C	T	T	G	T	G	G	A	T
2L	+	2L+16000369	FBti0018110	GT1	CACTCGCA	ATGCACTCGCAGAG		A	T	G	C	A	C	T	C	G	C	A	G	A	G
2L	+	2L+16166825	FBti0017643	GT1	GTGCAAAC	GGAGTGCAAACCAA		G	G	A	G	T	G	C	A	A	A	C	C	A	A
2L	+	2L+16231545	FBti0017675	GT1	GACGCGAC	GTAGACGCGACAAT		G	T	A	G	A	C	G	C	G	A	C	A	A	T
2L	+	2L+16351662	FBti0021329	GT1	CCTCAAGT	AGGCCTCAAGTGAA		A	G	G	C	C	T	C	A	A	G	T	G	A	A
2L	+	2L+16535768	FBti0018124	GT1	ACAGTGGG	AATACAGTGGGTAT		A	A	T	A	C	A	G	T	G	G	G	T	A	T
2L	+	2L+16888514	FBti0017749	GT1	GGTGGAAA	TATGGTGGAAATGT		T	A	T	G	G	T	G	G	A	A	A	T	G	T
2L	+	2L+17802861	FBti0017751	GT1	CTCACGAG	AAACTCACGAGCAT		A	A	A	C	T	C	A	C	G	A	G	C	A	T
2L	+	2L+17958939	FBti0017752	GT1	GCCCACAC	ATGGCCCACACTAG		A	T	G	G	C	C	C	A	C	A	C	T	A	G
2L	+	2L+18444886	FBti0017628	GT1	TATATGTG	GTATATATGTGTCG		G	T	A	T	A	T	A	T	G	T	G	T	C	G
2L	+	2L+18742521	FBti0018142	GT1	GGCGAAGT	CGTGGCGAAGTGTT		C	G	T	G	G	C	G	A	A	G	T	G	T	T
2L	+	2L+19124108	FBti0018106	GT1	GTCTACAG	GACGTCTACAGAGA		G	A	C	G	T	C	T	A	C	A	G	A	G	A
2L	+	2L+19231429	FBti0017595	GT1	AATATATA	AAGAATATATATAT		A	A	G	A	A	T	A	T	A	T	A	T	A	T
2L	+	2L+20085149	FBti0018134	GT1	ATCCAGAT	CACATCCAGATGGA		C	A	C	A	T	C	C	A	G	A	T	G	G	A
2L	+	2L+20638344	FBti0018556	GT1	GGCCCACG	AATGGCCCACGAGT		A	A	T	G	G	C	C	C	A	C	G	A	G	T
2L	+	2L+20650190	FBti0017194	GT1	ATTCGGCA	AGCATTCGGCATGG		A	G	C	A	T	T	C	G	G	C	A	T	G	G
2L	+	2L+20852538	FBti0017668	GT1	GACTGGAC	ATGGACTGGACTGG		A	T	G	G	A	C	T	G	G	A	C	T	G	G
2L	+	2L+21053000	FBti0018406	GT1	GTGCAAGG	CAAGTGCAAGGTCT		C	A	A	G	T	G	C	A	A	G	G	T	C	T
2L	+	2L+21250769	FBti0017714	GT1	AATCAACT	ACGAATCAACTCTT		A	C	G	A	A	T	C	A	A	C	T	C	T	T
2L	+	2L+21380167	FBti0018080	GT1	CACACACC	TAGCACACACCACA		T	A	G	C	A	C	A	C	A	C	C	A	C	A
2L	+	2L+21653194	FBti0018088	GT1	TGTTGGGG	TGTTGTTGGGGGCT		T	G	T	T	G	T	T	G	G	G	G	G	C	T
2R	+	2R+2389499	FBti0017203	GT1	ACCGAAAC	GCCACCGAAACTGT		G	C	C	A	C	C	G	A	A	A	C	T	G	T
2R	+	2R+2536122	FBti0017663	GT1	ACTCAGTT	ACTACTCAGTTGTT		A	C	T	A	C	T	C	A	G	T	T	G	T	T
2R	+	2R+2696949	FBti0018348	GT1	ACACAAAG	ATGACACAAAGCAA		A	T	G	A	C	A	C	A	A	A	G	C	A	A
2R	+	2R+2936693	FBti0018598	GT1	CGCCAGTT	CTTCGCCAGTTGTT		C	T	T	C	G	C	C	A	G	T	T	G	T	T
2R	+	2R+3805106	FBti0018135	GT1	GATAGTGC	ACAGATAGTGCACT		A	C	A	G	A	T	A	G	T	G	C	A	C	T
2R	+	2R+4576117	FBti0018414	GT1	ACCCGAGC	AACACCCGAGCGAT		A	A	C	A	C	C	C	G	A	G	C	G	A	T
2R	+	2R+5954327	FBti0021331	GT1	GTTCGTAT	TTGGTTCGTATCGC		T	T	G	G	T	T	C	G	T	A	T	C	G	C
2R	+	2R+6115851	FBti0018370	GT1	TGTCGAAC	CTCTGTCGAACCAA		C	T	C	T	G	T	C	G	A	A	C	C	A	A
2R	+	2R+6456690	FBti0017648	GT1	TTGGGTGA	GGTTTGGGTGAAAA		G	G	T	T	T	G	G	G	T	G	A	A	A	A
2R	+	2R+7003968	FBti0017603	GT1	AACATACA	TGCAACATACATGC		T	G	C	A	A	C	A	T	A	C	A	T	G	C
2R	+	2R+7323732	FBti0018585	GT1	GACTCAGG	ACTGACTCAGGGTT		A	C	T	G	A	C	T	C	A	G	G	G	T	T
2R	+	2R+7643904	FBti0018410	GT1	GTCCGCAT	GTTGTCCGCATTTT		G	T	T	G	T	C	C	G	C	A	T	T	T	T
2R	+	2R+7777960	FBti0021313	GT1	GCTTGTAG	TACGCTTGTAGGTT		T	A	C	G	C	T	T	G	T	A	G	G	T	T
2R	+	2R+7883966	FBti0018129	GT1	CCTGATAT	ATACCTGATATCAT		A	T	A	C	C	T	G	A	T	A	T	C	A	T
2R	+	2R+7932708	FBti0018405	GT1	GTTCACCA	ATTGTTCACCATAA		A	T	T	G	T	T	C	A	C	C	A	T	A	A
2R	+	2R+8288808	FBti0018538	GT1	TGCTGGCG	TGCTGCTGGCGCTG		T	G	C	T	G	C	T	G	G	C	G	C	T	G
2R	+	2R+8340753	FBti0024426	GT1	GTTCGGTC	TTGGTTCGGTCCAC		T	T	G	G	T	T	C	G	G	T	C	C	A	C
2R	+	2R+8804364	FBti0021314	GT1	CTCTGCCC	TTTCTCTGCCCGTT		T	T	T	C	T	C	T	G	C	C	C	G	T	T
2R	+	2R+8943914	FBti0017677	GT1	ATTTAAGC	TTGATTTAAGCTTG		T	T	G	A	T	T	T	A	A	G	C	T	T	G
2R	+	2R+9445581	FBti0017155	GT1	TCGCACGC	TACTCGCACGCACA		T	A	C	T	C	G	C	A	C	G	C	A	C	A
2R	+	2R+11237166	FBti0024424	GT1	ACCCAAGC	ACCACCCAAGCCCA		A	C	C	A	C	C	C	A	A	G	C	C	C	A
2R	+	2R+11280127	FBti0017622	GT1	GTCGCAGC	AAAGTCGCAGCACG		A	A	A	G	T	C	G	C	A	G	C	A	C	G
2R	+	2R+12026210	FBti0017586	GT1	GCACAGGT	ACTGCACAGGTGTT		A	C	T	G	C	A	C	A	G	G	T	G	T	T
2R	+	2R+12439655	FBti0017644	GT1	GTTCACGC	TCAGTTCACGCTTT		T	C	A	G	T	T	C	A	C	G	C	T	T	T
2R	+	2R+12906549	FBti0017174	GT1	CACTGGTG	TCACACTGGTGACG		T	C	A	C	A	C	T	G	G	T	G	A	C	G
2R	+	2R+13300268	FBti0018118	GT1	AGCGTGCT	ATAAGCGTGCTATA		A	T	A	A	G	C	G	T	G	C	T	A	T	A
2R	+	2R+13604155	FBti0017638	GT1	GTTTAATC	TCAGTTTAATCATT		T	C	A	G	T	T	T	A	A	T	C	A	T	T
2R	+	2R+13676842	FBti0017186	GT1	GTCTCGCT	AGGGTCTCGCTGTT		A	G	G	G	T	C	T	C	G	C	T	G	T	T
2R	+	2R+14285893	FBti0018601	GT1	TTGAGCTG	CCCTTGAGCTGGAC		C	C	C	T	T	G	A	G	C	T	G	G	A	C
2R	+	2R+14299531	FBti0017614	GT1	GGCAAAGC	AAAGGCAAAGCCAT		A	A	A	G	G	C	A	A	A	G	C	C	A	T
2R	+	2R+14299552	FBti0018553	GT1	GACTCGAC	CGCGACTCGACTCA		C	G	C	G	A	C	T	C	G	A	C	T	C	A
2R	+	2R+14693872	FBti0017183	GT1	GATTAGCA	TTCGATTAGCAGGT		T	T	C	G	A	T	T	A	G	C	A	G	G	T
2R	+	2R+14734539	FBti0021317	GT1	CAGACTAT	GAGCAGACTATAAA		G	A	G	C	A	G	A	C	T	A	T	A	A	A
2R	+	2R+15229265	FBti0018119	GT1	ACTCAGAC	GCCACTCAGACCCA		G	C	C	A	C	T	C	A	G	A	C	C	C	A
2R	+	2R+16206683	FBti0017754	GT1	CTCTATAC	TTGCTCTATACTCT		T	T	G	C	T	C	T	A	T	A	C	T	C	T
2R	+	2R+17362938	FBti0021323	GT1	ATCCCGAC	ACGATCCCGACGGT		A	C	G	A	T	C	C	C	G	A	C	G	G	T
2R	+	2R+17601626	FBti0017616	GT1	CTCTGCTT	TTACTCTGCTTCTT		T	T	A	C	T	C	T	G	C	T	T	C	T	T
2R	+	2R+17759527	FBti0018372	GT1	GGCAAGGC	TGGGGCAAGGCTCT		T	G	G	G	G	C	A	A	G	G	C	T	C	T
2R	+	2R+18010452	FBti0018079	GT1	GCGTAGAC	AGAGCGTAGACAGA		A	G	A	G	C	G	T	A	G	A	C	A	G	A
2R	+	2R+18024450	FBti0017694	GT1	GCCCAGCC	GTAGCCCAGCCGCT		G	T	A	G	C	C	C	A	G	C	C	G	C	T
2R	+	2R+18131288	FBti0018107	GT1	GCGGCAGG	ATTGCGGCAGGTGA		A	T	T	G	C	G	G	C	A	G	G	T	G	A
2R	+	2R+18548083	FBti0017704	GT1	GACAAGAA	GTTGACAAGAACAT		G	T	T	G	A	C	A	A	G	A	A	C	A	T
2R	+	2R+18576639	FBti0018575	GT1	GGCTGCAG	TAGGGCTGCAGCAT		T	A	G	G	G	C	T	G	C	A	G	C	A	T
3L	+	3L+779684	FBti0018396	GT1	GTTCAATC	AGGGTTCAATCAGA		A	G	G	G	T	T	C	A	A	T	C	A	G	A
3L	+	3L+959581	FBti0017207	GT1	GTCTGAGT	TTGGTCTGAGTGTG		T	T	G	G	T	C	T	G	A	G	T	G	T	G
3L	+	3L+4102694	FBti0018577	GT1	GTTTGAAT	TACGTTTGAATTAA		T	A	C	G	T	T	T	G	A	A	T	T	A	A
3L	+	3L+5241559	FBti0017212	GT1	GTTAAGGG	TCCGTTAAGGGTTG		T	C	C	G	T	T	A	A	G	G	G	T	T	G
3L	+	3L+5558322	FBti0017721	GT1	GTGGGAAC	TATGTGGGAACGAA		T	A	T	G	T	G	G	G	A	A	C	G	A	A
3L	+	3L+6488791	FBti0018130	GT1	ATTGCGAT	TTCATTGCGATTGC		T	T	C	A	T	T	G	C	G	A	T	T	G	C
3L	+	3L+7941217	FBti0024430	GT1	CTACGCGC	TTGCTACGCGCCAG		T	T	G	C	T	A	C	G	C	G	C	C	A	G
3L	+	3L+8184604	FBti0018543	GT1	GTTTAGTT	AGCGTTTAGTTTGA		A	G	C	G	T	T	T	A	G	T	T	T	G	A
3L	+	3L+9366947	FBti0017718	GT1	GCTCAGCG	TTTGCTCAGCGGAT		T	T	T	G	C	T	C	A	G	C	G	G	A	T
3L	+	3L+9374838	FBti0018417	GT1	CCTGTACA	TGGCCTGTACATAG		T	G	G	C	C	T	G	T	A	C	A	T	A	G
3L	+	3L+9707566	FBti0024422	GT1	TTTCACAA	TCCTTTCACAAATA		T	C	C	T	T	T	C	A	C	A	A	A	T	A
3L	+	3L+9849239	FBti0017605	GT1	GTGCGATA	TTTGTGCGATACTT		T	T	T	G	T	G	C	G	A	T	A	C	T	T
3L	+	3L+10659151	FBti0017673	GT1	GCCATGTC	GTAGCCATGTCGAA		G	T	A	G	C	C	A	T	G	T	C	G	A	A
3L	+	3L+11208244	FBti0017179	GT1	ATTTAGAC	GGCATTTAGACTAA		G	G	C	A	T	T	T	A	G	A	C	T	A	A
3L	+	3L+11245243	FBti0018094	GT1	GGCTAGAC	AATGGCTAGACGAA		A	A	T	G	G	C	T	A	G	A	C	G	A	A
3L	+	3L+11428915	FBti0017172	GT1	GTCTAGTC	GGTGTCTAGTCCTC		G	G	T	G	T	C	T	A	G	T	C	C	T	C
3L	+	3L+11480379	FBti0018147	GT1	GTCCAGGC	AATGTCCAGGCGAT		A	A	T	G	T	C	C	A	G	G	C	G	A	T
3L	+	3L+11714227	FBti0017723	GT1	GCTCAGTC	TTCGCTCAGTCTCA		T	T	C	G	C	T	C	A	G	T	C	T	C	A
3L	+	3L+12270789	FBti0018600	GT1	TCTTGGCC	TCGTCTTGGCCCAT		T	C	G	T	C	T	T	G	G	C	C	C	A	T
3L	+	3L+12602507	FBti0018097	GT1	GTCTGGAG	ATTGTCTGGAGTGT		A	T	T	G	T	C	T	G	G	A	G	T	G	T
3L	+	3L+13549236	FBti0021311	GT1	GCCTGGAC	AAAGCCTGGACACA		A	A	A	G	C	C	T	G	G	A	C	A	C	A
3L	+	3L+13897614	FBti0018592	GT1	CCCTGTAA	ATACCCTGTAATAT		A	T	A	C	C	C	T	G	T	A	A	T	A	T
3L	+	3L+13913200	FBti0018111	GT1	GACCGAAC	ACTGACCGAACTGA		A	C	T	G	A	C	C	G	A	A	C	T	G	A
3L	+	3L+14267426	FBti0018408	GT1	ATCTAAAT	AGAATCTAAATCTA		A	G	A	A	T	C	T	A	A	A	T	C	T	A
3L	+	3L+14335132	FBti0018386	GT1	ATGCAGAC	ATAATGCAGACGAA		A	T	A	A	T	G	C	A	G	A	C	G	A	A
3L	+	3L+14625667	FBti0017609	GT1	ATCCACAG	CACATCCACAGACA		C	A	C	A	T	C	C	A	C	A	G	A	C	A
3L	+	3L+14779997	FBti0018114	GT1	TAGGGGGC	TCATAGGGGGCTAT		T	C	A	T	A	G	G	G	G	G	C	T	A	T
3L	+	3L+14965586	FBti0017708	GT1	CACCAGCA	AAACACCAGCAGCT		A	A	A	C	A	C	C	A	G	C	A	G	C	T
3L	+	3L+14980561	FBti0018092	GT1	ATTAGGTG	AGAATTAGGTGTAT		A	G	A	A	T	T	A	G	G	T	G	T	A	T
3L	+	3L+15091821	FBti0017199	GT1	CAGGTTAC	TTACAGGTTACGTT		T	T	A	C	A	G	G	T	T	A	C	G	T	T
3L	+	3L+15227128	FBti0018126	GT1	GTTTGGCC	GTTGTTTGGCCAAG		G	T	T	G	T	T	T	G	G	C	C	A	A	G
3L	+	3L+15525664	FBti0017604	GT1	GAGTAGAT	TACGAGTAGATGTA		T	A	C	G	A	G	T	A	G	A	T	G	T	A
3L	+	3L+15819332	FBti0018104	GT1	AGCCAATC	ATCAGCCAATCTCA		A	T	C	A	G	C	C	A	A	T	C	T	C	A
3L	+	3L+17009624	FBti0018552	GT1	CACCTGAG	AAGCACCTGAGTGT		A	A	G	C	A	C	C	T	G	A	G	T	G	T
3L	+	3L+17605263	FBti0018143	GT1	GTCCAAAG	TTGGTCCAAAGTGC		T	T	G	G	T	C	C	A	A	A	G	T	G	C
3L	+	3L+17662018	FBti0017715	GT1	CGTTGTGT	ATACGTTGTGTACG		A	T	A	C	G	T	T	G	T	G	T	A	C	G
3L	+	3L+18070910	FBti0017145	GT1	AATATGTC	ATAAATATGTCCAA		A	T	A	A	A	T	A	T	G	T	C	C	A	A
3L	+	3L+19171440	FBti0018100	GT1	CCCTTGCC	TTTCCCTTGCCCGC		T	T	T	C	C	C	T	T	G	C	C	C	G	C
3L	+	3L+20502932	FBti0017740	GT1	GTTCCGCG	CTCGTTCCGCGCGT		C	T	C	G	T	T	C	C	G	C	G	C	G	T
3L	+	3L+21502914	FBti0017157	GT1	GACTGGCC	ATCGACTGGCCTTT		A	T	C	G	A	C	T	G	G	C	C	T	T	T
3L	+	3L+21834383	FBti0021328	GT1	CTTAAGTT	AAGCTTAAGTTCTT		A	A	G	C	T	T	A	A	G	T	T	C	T	T
3L	+	3L+21890354	FBti0017144	GT1	CTGTTGGC	AGCCTGTTGGCATT		A	G	C	C	T	G	T	T	G	G	C	A	T	T
3L	+	3L+22813328	FBti0018557	GT1	CACTCCAC	TTGCACTCCACACA		T	T	G	C	A	C	T	C	C	A	C	A	C	A
3L	+	3L+22828831	FBti0017149	GT1	GGCCAACC	CACGGCCAACCGCA		C	A	C	G	G	C	C	A	A	C	C	G	C	A
3R	+	3R+397564	FBti0018362	GT1	GGTTGGCT	GTGGGTTGGCTGAG		G	T	G	G	G	T	T	G	G	C	T	G	A	G
3R	+	3R+424349	FBti0018076	GT1	CATCACCC	ACCCATCACCCCCT		A	C	C	C	A	T	C	A	C	C	C	C	C	T
3R	+	3R+1193320	FBti0017197	GT1	GCACTCAC	AAAGCACTCACACA		A	A	A	G	C	A	C	T	C	A	C	A	C	A
3R	+	3R+1311276	FBti0018145	GT1	GGTTCGGG	TTGGGTTCGGGTGC		T	T	G	G	G	T	T	C	G	G	G	T	G	C
3R	+	3R+1511172	FBti0017707	GT1	ACGCGAAG	AGCACGCGAAGCAA		A	G	C	A	C	G	C	G	A	A	G	C	A	A
3R	+	3R+2085775	FBti0017143	GT1	CTTGATGC	TCCCTTGATGCGCC		T	C	C	C	T	T	G	A	T	G	C	G	C	C
3R	+	3R+7567801	FBti0018546	GT1	GTTATGTC	AACGTTATGTCAAT		A	A	C	G	T	T	A	T	G	T	C	A	A	T
3R	+	3R+8249756	FBti0018382	GT1	GCCTGGCC	TTAGCCTGGCCAAA		T	T	A	G	C	C	T	G	G	C	C	A	A	A
3R	+	3R+8268849	FBti0018394	GT1	CTGCTGAG	CAGCTGCTGAGCAT		C	A	G	C	T	G	C	T	G	A	G	C	A	T
3R	+	3R+9882579	FBti0018404	GT1	CGTTCGCC	TTTCGTTCGCCAGC		T	T	T	C	G	T	T	C	G	C	C	A	G	C
3R	+	3R+10434814	FBti0017654	GT1	GTCCACGA	ATGGTCCACGATCC		A	T	G	G	T	C	C	A	C	G	A	T	C	C
3R	+	3R+12944780	FBti0018579	GT1	CAGCACAC	CACCAGCACACCAT		C	A	C	C	A	G	C	A	C	A	C	C	A	T
3R	+	3R+14141068	FBti0017192	GT1	CTCATTGT	AGTCTCATTGTGTT		A	G	T	C	T	C	A	T	T	G	T	G	T	T
3R	+	3R+14922411	FBti0017180	GT1	GCTAGATT	AAGGCTAGATTGAC		A	A	G	G	C	T	A	G	A	T	T	G	A	C
3R	+	3R+16135180	FBti0017658	GT1	ACACAGCA	ACAACACAGCAGGT		A	C	A	A	C	A	C	A	G	C	A	G	G	T
3R	+	3R+16420537	FBti0017727	GT1	AACTGAAG	AACAACTGAAGGCA		A	A	C	A	A	C	T	G	A	A	G	G	C	A
3R	+	3R+17674232	FBti0017577	GT1	GGTGGGCG	AGGGGTGGGCGGTT		A	G	G	G	G	T	G	G	G	C	G	G	T	T
3R	+	3R+18552948	FBti0021316	GT1	GTTTGGAG	TCGGTTTGGAGTAG		T	C	G	G	T	T	T	G	G	A	G	T	A	G
3R	+	3R+19490414	FBti0017162	GT1	ATTGTGAG	GACATTGTGAGCAC		G	A	C	A	T	T	G	T	G	A	G	C	A	C
3R	+	3R+19715606	FBti0021318	GT1	TTTTTGTG	TCCTTTTTGTGCCT		T	C	C	T	T	T	T	T	G	T	G	C	C	T
3R	+	3R+20963730	FBti0017620	GT1	GCTGAGGT	AGGGCTGAGGTGCT		A	G	G	G	C	T	G	A	G	G	T	G	C	T
3R	+	3R+20987589	FBti0017159	GT1	CGCGAAAC	CGACGCGAAACTAA		C	G	A	C	G	C	G	A	A	A	C	T	A	A
3R	+	3R+21471260	FBti0017178	GT1	GGCTGAAA	AACGGCTGAAATGA		A	A	C	G	G	C	T	G	A	A	A	T	G	A
3R	+	3R+21840434	FBti0018399	GT1	GGCCAGCG	TTAGGCCAGCGAAA		T	T	A	G	G	C	C	A	G	C	G	A	A	A
3R	+	3R+22440143	FBti0018084	GT1	GTTCACGT	TTTGTTCACGTTCT		T	T	T	G	T	T	C	A	C	G	T	T	C	T
3R	+	3R+24500651	FBti0017634	GT1	CCGCACGC	AAACCGCACGCGTT		A	A	A	C	C	G	C	A	C	G	C	G	T	T
3R	+	3R+24816609	FBti0017756	GT1	GCCCAGAT	AGCGCCCAGATTGC		A	G	C	G	C	C	C	A	G	A	T	T	G	C
3R	+	3R+25608521	FBti0017217	GT1	GGCAATGC	ACGGGCAATGCGAT		A	C	G	G	G	C	A	A	T	G	C	G	A	T
3R	+	3R+25809102	FBti0018381	GT1	GTTGATAC	ATTGTTGATACTGT		A	T	T	G	T	T	G	A	T	A	C	T	G	T
3R	+	3R+26118510	FBti0017742	GT1	GACGGGTG	ATAGACGGGTGCTA		A	T	A	G	A	C	G	G	G	T	G	C	T	A
3R	+	3R+26864615	FBti0018595	GT1	CTTGGAGC	TAGCTTGGAGCTCG		T	A	G	C	T	T	G	G	A	G	C	T	C	G
3R	+	3R+27638647	FBti0018551	GT1	ATACAGTT	ATCATACAGTTATT		A	T	C	A	T	A	C	A	G	T	T	A	T	T
3R	+	3R+27812651	FBti0017655	GT1	GTGTGGGC	TTGGTGTGGGCGAG		T	T	G	G	T	G	T	G	G	G	C	G	A	G
4	+	4+718838	FBti0024423	GT1	CACTTGTC	TCACACTTGTCATT		T	C	A	C	A	C	T	T	G	T	C	A	T	T
4	+	4+1105069	FBti0017661	GT1	GTGCAGCC	AGCGTGCAGCCCAT		A	G	C	G	T	G	C	A	G	C	C	C	A	T
X	+	X+457897	FBti0018151	GT1	AGGTAGAC	AACAGGTAGACGCT		A	A	C	A	G	G	T	A	G	A	C	G	C	T
X	+	X+543525	FBti0018384	GT1	GTTATCAC	AAAGTTATCACTTT		A	A	A	G	T	T	A	T	C	A	C	T	T	T
X	+	X+840138	FBti0017607	GT1	GTCGCAGC	TCCGTCGCAGCGCT		T	C	C	G	T	C	G	C	A	G	C	G	C	T
X	+	X+1137112	FBti0017722	GT1	CTTTTTGT	TTTCTTTTTGTTAG		T	T	T	C	T	T	T	T	T	G	T	T	A	G
X	+	X+1668256	FBti0018122	GT1	TATCAACC	CGTTATCAACCATT		C	G	T	T	A	T	C	A	A	C	C	A	T	T
X	+	X+1835931	FBti0017687	GT1	TATGTGCC	AGCTATGTGCCTAT		A	G	C	T	A	T	G	T	G	C	C	T	A	T
X	+	X+1869994	FBti0017642	GT1	GACCAACG	CCTGACCAACGGCA		C	C	T	G	A	C	C	A	A	C	G	G	C	A
X	+	X+2186940	FBti0017621	GT1	TCACTTTC	GTTTCACTTTCAAC		G	T	T	T	C	A	C	T	T	T	C	A	A	C
X	+	X+2195751	FBti0017713	GT1	ACGCTGCC	TTGACGCTGCCGCT		T	T	G	A	C	G	C	T	G	C	C	G	C	T
X	+	X+2633862	FBti0018418	GT1	CCACCACC	AAGCCACCACCCGC		A	A	G	C	C	A	C	C	A	C	C	C	G	C
X	+	X+2823642	FBti0018597	GT1	CCAGGGCC	ATCCCAGGGCCGGT		A	T	C	C	C	A	G	G	G	C	C	G	G	T
X	+	X+3042541	FBti0017736	GT1	GGTAGGGC	ATAGGTAGGGCGCT		A	T	A	G	G	T	A	G	G	G	C	G	C	T
X	+	X+3129103	FBti0017587	GT1	CTCGCAGC	AAGCTCGCAGCATT		A	A	G	C	T	C	G	C	A	G	C	A	T	T
X	+	X+3266986	FBti0018373	GT1	ACTACTAC	AGCACTACTACTAA		A	G	C	A	C	T	A	C	T	A	C	T	A	A
X	+	X+3277104	FBti0018138	GT1	GTATCAAA	TTTGTATCAAACAT		T	T	T	G	T	A	T	C	A	A	A	C	A	T
X	+	X+4000256	FBti0017612	GT1	GACTCTCC	TTGGACTCTCCCCT		T	T	G	G	A	C	T	C	T	C	C	C	C	T
X	+	X+4215965	FBti0018534	GT1	CAGCAAGT	AAGCAGCAAGTCAA		A	A	G	C	A	G	C	A	A	G	T	C	A	A
X	+	X+4218812	FBti0017142	GT1	CTACGCCC	ACACTACGCCCTCT		A	C	A	C	T	A	C	G	C	C	C	T	C	T
X	+	X+4448027	FBti0024427	GT1	ATCGGAAT	ACTATCGGAATAAC		A	C	T	A	T	C	G	G	A	A	T	A	A	C
X	+	X+4803032	FBti0017657	GT1	CTGCAACC	AAACTGCAACCCTT		A	A	A	C	T	G	C	A	A	C	C	C	T	T
X	+	X+5258415	FBti0018087	GT1	CTTACATG	AGGCTTACATGCTC		A	G	G	C	T	T	A	C	A	T	G	C	T	C
X	+	X+5523403	FBti0017758	GT1	GTCGCTGA	AAAGTCGCTGAGTA		A	A	A	G	T	C	G	C	T	G	A	G	T	A
X	+	X+5556918	FBti0017717	GT1	GTGTGGAC	AGTGTGTGGACATA		A	G	T	G	T	G	T	G	G	A	C	A	T	A
X	+	X+5786757	FBti0018391	GT1	GTTCACTT	TTGGTTCACTTATT		T	T	G	G	T	T	C	A	C	T	T	A	T	T
X	+	X+5882758	FBti0018102	GT1	GCCCGACC	ACCGCCCGACCGAC		A	C	C	G	C	C	C	G	A	C	C	G	A	C
X	+	X+6211582	FBti0017660	GT1	TCGTGATT	CTATCGTGATTCCT		C	T	A	T	C	G	T	G	A	T	T	C	C	T
X	+	X+6593176	FBti0017211	GT1	GCCCGGCT	GAAGCCCGGCTAAC		G	A	A	G	C	C	C	G	G	C	T	A	A	C
X	+	X+6698828	FBti0017748	GT1	TCCGGATG	TCCTCCGGATGGAT		T	C	C	T	C	C	G	G	A	T	G	G	A	T
X	+	X+6762454	FBti0018153	GT1	CTCTGAAC	CAACTCTGAACTTA		C	A	A	C	T	C	T	G	A	A	C	T	T	A
X	+	X+6879851	FBti0018095	GT1	GGCCCGTG	TTCGGCCCGTGTCG		T	T	C	G	G	C	C	C	G	T	G	T	C	G
X	+	X+7098721	FBti0017176	GT1	GTTTGGCA	TTTGTTTGGCATAA		T	T	T	G	T	T	T	G	G	C	A	T	A	A
X	+	X+8109245	FBti0017589	GT1	GCTAGGTC	ATGGCTAGGTCGGT		A	T	G	G	C	T	A	G	G	T	C	G	G	T
X	+	X+8412660	FBti0017631	GT1	GTTTAGAT	AGCGTTTAGATTGT		A	G	C	G	T	T	T	A	G	A	T	T	G	T
X	+	X+8448770	FBti0017724	GT1	CTATAGCG	TTACTATAGCGAAT		T	T	A	C	T	A	T	A	G	C	G	A	A	T
X	+	X+8500591	FBti0018572	GT1	CACTCAAC	TCACACTCAACTTG		T	C	A	C	A	C	T	C	A	A	C	T	T	G
X	+	X+9200324	FBti0018140	GT1	GCTACAAT	TTCGCTACAATATT		T	T	C	G	C	T	A	C	A	A	T	A	T	T
X	+	X+9488517	FBti0018353	GT1	CATCAGAA	AAACATCAGAAAAA		A	A	A	C	A	T	C	A	G	A	A	A	A	A
X	+	X+10479515	FBti0017156	GT1	AACCAAGC	ACAAACCAAGCCAA		A	C	A	A	A	C	C	A	A	G	C	C	A	A
X	+	X+10709798	FBti0018113	GT1	GGCTTAGC	AAGGGCTTAGCCTA		A	A	G	G	G	C	T	T	A	G	C	C	T	A
X	+	X+11320283	FBti0017593	GT1	GCATCGCC	GTAGCATCGCCTTT		G	T	A	G	C	A	T	C	G	C	C	T	T	T
X	+	X+11497834	FBti0017640	GT1	GATGAAAC	CCAGATGAAACAAA		C	C	A	G	A	T	G	A	A	A	C	A	A	A
X	+	X+11516914	FBti0017720	GT1	TAACAGAC	AAATAACAGACAAT		A	A	A	T	A	A	C	A	G	A	C	A	A	T
X	+	X+11611054	FBti0018363	GT1	GCTGAGAC	ACGGCTGAGACTCT		A	C	G	G	C	T	G	A	G	A	C	T	C	T
X	+	X+12557965	FBti0018357	GT1	CTTACGGT	AGACTTACGGTGGT		A	G	A	C	T	T	A	C	G	G	T	G	G	T
X	+	X+12641362	FBti0017184	GT1	GTGGTGGG	TGTGTGGTGGGCCA		T	G	T	G	T	G	G	T	G	G	G	C	C	A
X	+	X+13151235	FBti0018109	GT1	AGTCGATC	TGCAGTCGATCTTT		T	G	C	A	G	T	C	G	A	T	C	T	T	T
X	+	X+13641319	FBti0018366	GT1	GCCCCAGT	TTTGCCCCAGTCAA		T	T	T	G	C	C	C	C	A	G	T	C	A	A
X	+	X+14216505	FBti0018379	GT1	GTCCGAGG	ATTGTCCGAGGAGC		A	T	T	G	T	C	C	G	A	G	G	A	G	C
X	+	X+14559557	FBti0018587	GT1	ATACAAAT	ATAATACAAATAAT		A	T	A	A	T	A	C	A	A	A	T	A	A	T
X	+	X+14734001	FBti0017662	GT1	CTATAACC	AAACTATAACCACT		A	A	A	C	T	A	T	A	A	C	C	A	C	T
X	+	X+15378752	FBti0017198	GT1	GTGCGAGA	ATCGTGCGAGAGAG		A	T	C	G	T	G	C	G	A	G	A	G	A	G
X	+	X+15556128	FBti0024421	GT1	TGCGGGGA	TTGTGCGGGGAATA		T	T	G	T	G	C	G	G	G	G	A	A	T	A
X	+	X+15682915	FBti0017140	GT1	AACAAAGT	AGCAACAAAGTTAT		A	G	C	A	A	C	A	A	A	G	T	T	A	T
X	+	X+16316811	FBti0018378	GT1	GGCTACTG	TTTGGCTACTGGAG		T	T	T	G	G	C	T	A	C	T	G	G	A	G
X	+	X+16618285	FBti0017632	GT1	GTTTGGTA	TTAGTTTGGTAAAT		T	T	A	G	T	T	T	G	G	T	A	A	A	T
X	+	X+17019041	FBti0017703	GT1	GGAGAGAC	AATGGAGAGACAAC		A	A	T	G	G	A	G	A	G	A	C	A	A	C
X	+	X+17551398	FBti0018420	GT1	CCATTCAG	GTTCCATTCAGGTT		G	T	T	C	C	A	T	T	C	A	G	G	T	T
X	+	X+17724724	FBti0018542	GT1	GTGTAGAA	CTCGTGTAGAAGCA		C	T	C	G	T	G	T	A	G	A	A	G	C	A
X	+	X+17736214	FBti0017195	GT1	AGTCAGAC	ATTAGTCAGACTAT		A	T	T	A	G	T	C	A	G	A	C	T	A	T
X	+	X+18542227	FBti0018412	GT1	GTTTGAAT	TCAGTTTGAATTCT		T	C	A	G	T	T	T	G	A	A	T	T	C	T
X	+	X+19247675	FBti0017737	GT1	GCCCGGAC	ATCGCCCGGACCGG		A	T	C	G	C	C	C	G	G	A	C	C	G	G
X	+	X+20320361	FBti0017215	GT1	ACCTGGCA	TTAACCTGGCACAA		T	T	A	A	C	C	T	G	G	C	A	C	A	A
X	+	X+20527235	FBti0017633	GT1	CGTCCGCC	TTGCGTCCGCCTCT		T	T	G	C	G	T	C	C	G	C	C	T	C	T
X	+	X+20916261	FBti0018082	GT1	CGCCAGCC	AAACGCCAGCCTGT		A	A	A	C	G	C	C	A	G	C	C	T	G	T
X	+	X+21048247	FBti0017584	GT1	GTACAAGC	GAAGTACAAGCAAA		G	A	A	G	T	A	C	A	A	G	C	A	A	A
X	+	X+21234139	FBti0017759	GT1	GCCTGGCT	AATGCCTGGCTGGT		A	A	T	G	C	C	T	G	G	C	T	G	G	T
X	+	X+21914130	FBti0018415	GT1	TTACCGGC	AACTTACCGGCCAT		A	A	C	T	T	A	C	C	G	G	C	C	A	T
							Position Count Matrix GT+
						Sum	A	115	66	66	47	45	27	32	97	80	89	28	51	89	73
							C	25	45	65	57	59	100	96	41	28	57	115	58	55	27
							G	25	43	62	118	41	35	38	77	115	58	52	70	44	27
							T	80	91	52	23	100	83	79	30	22	41	50	66	57	118
						Checksum		245	245	245	245	245	245	245	245	245	245	245	245	245	245
							Position Frequency Matrix GT+
						Sum	A	46.9388	26.9388	26.9388	19.1837	18.3673	11.0204	13.0612	39.5918	32.6531	36.3265	11.4286	20.8163	36.3265	29.7959
							C	10.2041	18.3673	26.5306	23.2653	24.0816	40.8163	39.1837	16.7347	11.4286	23.2653	46.9388	23.6735	22.449	11.0204
							G	10.2041	17.551	25.3061	48.1633	16.7347	14.2857	15.5102	31.4286	46.9388	23.6735	21.2245	28.5714	17.9592	11.0204
							T	32.6531	37.1429	21.2245	9.38776	40.8163	33.8776	32.2449	12.2449	8.97959	16.7347	20.4082	26.9388	23.2653	48.1633
						Checksum		100	100	100	100	100	100	100	100	100	100	100	100	100	100

## Sheet: SUPor-P -
Chromosome	P direction	InsertionSite	PelementFlybaseId	PelementTypes	8 bp repeat	14 bp ins. site		1	2	3	4	5	6	7	8	9	10	11	12	13	14
2L	-	2L-19502	FBti0023166	SUPor-P	TGACGAAC	TTATGACGAACTGT		T	T	A	T	G	A	C	G	A	A	C	T	G	T
2L	-	2L-146668	FBti0021938	SUPor-P	GTCTGAAT	AGGGTCTGAATGTC		A	G	G	G	T	C	T	G	A	A	T	G	T	C
2L	-	2L-306162	FBti0024767	SUPor-P	CACGAGCC	AAACACGAGCCGCT		A	A	A	C	A	C	G	A	G	C	C	G	C	T
2L	-	2L-421639	FBti0024718	SUPor-P	GAGTGGGT	CTCGAGTGGGTTTT		C	T	C	G	A	G	T	G	G	G	T	T	T	T
2L	-	2L-484698	FBti0021207	SUPor-P	ATCCGAGC	ATAATCCGAGCCAG		A	T	A	A	T	C	C	G	A	G	C	C	A	G
2L	-	2L-809344	FBti0023610	SUPor-P	GCTCCCAC	TAAGCTCCCACTTG		T	A	A	G	C	T	C	C	C	A	C	T	T	G
2L	-	2L-825814	FBti0039047	SUPor-P	ACTGCGTG	AACACTGCGTGGTT		A	A	C	A	C	T	G	C	G	T	G	G	T	T
2L	-	2L-868390	FBti0021814	SUPor-P	CATTAGCT	CTCCATTAGCTGAT		C	T	C	C	A	T	T	A	G	C	T	G	A	T
2L	-	2L-1043239	FBti0021433	SUPor-P	GTTTGAAA	ACTGTTTGAAACGT		A	C	T	G	T	T	T	G	A	A	A	C	G	T
2L	-	2L-1119142	FBti0021172	SUPor-P	GCCCGCGG	ATTGCCCGCGGACT		A	T	T	G	C	C	C	G	C	G	G	A	C	T
2L	-	2L-1119653	FBti0024518	SUPor-P	AGCCTAAC	AGCAGCCTAACTAA		A	G	C	A	G	C	C	T	A	A	C	T	A	A
2L	-	2L-1150815	FBti0021540	SUPor-P	GTCTGCGC	CGCGTCTGCGCTTA		C	G	C	G	T	C	T	G	C	G	C	T	T	A
2L	-	2L-1177713	FBti0024988	SUPor-P	CTGGGGCG	GTGCTGGGGCGCAT		G	T	G	C	T	G	G	G	G	C	G	C	A	T
2L	-	2L-1465595	FBti0024665	SUPor-P	TAAGGCGT	GTCTAAGGCGTCTG		G	T	C	T	A	A	G	G	C	G	T	C	T	G
2L	-	2L-1711582	FBti0021401	SUPor-P	GATGACAC	ATGGATGACACTTT		A	T	G	G	A	T	G	A	C	A	C	T	T	T
2L	-	2L-1980734	FBti0039075	SUPor-P	CTCTGGGC	TTCCTCTGGGCTAA		T	T	C	C	T	C	T	G	G	G	C	T	A	A
2L	-	2L-1987769	FBti0023207	SUPor-P	GTCTGGAG	ATCGTCTGGAGTTT		A	T	C	G	T	C	T	G	G	A	G	T	T	T
2L	-	2L-2011683	FBti0024496	SUPor-P	GCATGTAC	ATCGCATGTACATT		A	T	C	G	C	A	T	G	T	A	C	A	T	T
2L	-	2L-2130392	FBti0024636	SUPor-P	GTCAAGGT	GAAGTCAAGGTCGA		G	A	A	G	T	C	A	A	G	G	T	C	G	A
2L	-	2L-2147166	FBti0021443	SUPor-P	GTGCTGGG	TCGGTGCTGGGTAA		T	C	G	G	T	G	C	T	G	G	G	T	A	A
2L	-	2L-2178792	FBti0023564	SUPor-P	GCCCTCGC	ACTGCCCTCGCAGC		A	C	T	G	C	C	C	T	C	G	C	A	G	C
2L	-	2L-2221651	FBti0023424	SUPor-P	CACCAGAC	ATGCACCAGACTGT		A	T	G	C	A	C	C	A	G	A	C	T	G	T
2L	-	2L-2236799	FBti0021375	SUPor-P	ATTTGGGC	ATGATTTGGGCTAT		A	T	G	A	T	T	T	G	G	G	C	T	A	T
2L	-	2L-2420339	FBti0021268	SUPor-P	ATTTGAAC	TTGATTTGAACGTT		T	T	G	A	T	T	T	G	A	A	C	G	T	T
2L	-	2L-2451177	FBti0023437	SUPor-P	ATTTGTAC	ATCATTTGTACTCT		A	T	C	A	T	T	T	G	T	A	C	T	C	T
2L	-	2L-2460196	FBti0024732	SUPor-P	CATCGGAT	ATTCATCGGATCAT		A	T	T	C	A	T	C	G	G	A	T	C	A	T
2L	-	2L-2494619	FBti0023417	SUPor-P	GGAGGAAG	TGGGGAGGAAGTAT		T	G	G	G	G	A	G	G	A	A	G	T	A	T
2L	-	2L-2510944	FBti0021578	SUPor-P	GTTTGAAG	AGGGTTTGAAGTGA		A	G	G	G	T	T	T	G	A	A	G	T	G	A
2L	-	2L-2562401	FBti0023389	SUPor-P	GGCCGAAG	AATGGCCGAAGTCT		A	A	T	G	G	C	C	G	A	A	G	T	C	T
2L	-	2L-2608318	FBti0021874	SUPor-P	GGCCAAAA	CAAGGCCAAAATCA		C	A	A	G	G	C	C	A	A	A	A	T	C	A
2L	-	2L-2647703	FBti0039098	SUPor-P	GACGCGAC	TAAGACGCGACACA		T	A	A	G	A	C	G	C	G	A	C	A	C	A
2L	-	2L-2751062	FBti0024440	SUPor-P	GAATGAAC	TTTGAATGAACGAT		T	T	T	G	A	A	T	G	A	A	C	G	A	T
2L	-	2L-2753324	FBti0020889	SUPor-P	GTCCGACA	ACAGTCCGACAGCA		A	C	A	G	T	C	C	G	A	C	A	G	C	A
2L	-	2L-2761526	FBti0023154	SUPor-P	CTATTCCA	AAACTATTCCAGTA		A	A	A	C	T	A	T	T	C	C	A	G	T	A
2L	-	2L-2767774	FBti0023338	SUPor-P	GATCAGAG	AACGATCAGAGCAT		A	A	C	G	A	T	C	A	G	A	G	C	A	T
2L	-	2L-2770161	FBti0018623	SUPor-P	GTCTGGGT	TTCGTCTGGGTCTT		T	T	C	G	T	C	T	G	G	G	T	C	T	T
2L	-	2L-2783738	FBti0024721	SUPor-P	GTTTGACC	TCTGTTTGACCATT		T	C	T	G	T	T	T	G	A	C	C	A	T	T
2L	-	2L-2790483	FBti0024478	SUPor-P	TTTTAGAT	TTATTTTAGATCAA		T	T	A	T	T	T	T	A	G	A	T	C	A	A
2L	-	2L-2804804	FBti0023201	SUPor-P	GTTCATCC	CCTGTTCATCCTGC		C	C	T	G	T	T	C	A	T	C	C	T	G	C
2L	-	2L-2815865	FBti0024827	SUPor-P	ACCCATGC	TTGACCCATGCTAT		T	T	G	A	C	C	C	A	T	G	C	T	A	T
2L	-	2L-2830704	FBti0021621	SUPor-P	GACTGGCT	AATGACTGGCTAAT		A	A	T	G	A	C	T	G	G	C	T	A	A	T
2L	-	2L-2857290	FBti0018834	SUPor-P	GGCTGTGC	ACCGGCTGTGCGAG		A	C	C	G	G	C	T	G	T	G	C	G	A	G
2L	-	2L-2861688	FBti0023189	SUPor-P	ATCAGACC	ATCATCAGACCGAC		A	T	C	A	T	C	A	G	A	C	C	G	A	C
2L	-	2L-2862546	FBti0025021	SUPor-P	CCTCGAAC	TTGCCTCGAACAAC		T	T	G	C	C	T	C	G	A	A	C	A	A	C
2L	-	2L-2885250	FBti0021159	SUPor-P	AGTTGGCC	AGAAGTTGGCCCAA		A	G	A	A	G	T	T	G	G	C	C	C	A	A
2L	-	2L-2993015	FBti0021265	SUPor-P	TACCAGTT	TTATACCAGTTTTT		T	T	A	T	A	C	C	A	G	T	T	T	T	T
2L	-	2L-3009941	FBti0023190	SUPor-P	TTCCTAAC	TTATTCCTAACTAT		T	T	A	T	T	C	C	T	A	A	C	T	A	T
2L	-	2L-3037234	FBti0018662	SUPor-P	AGCGGGAG	ACGAGCGGGAGAGA		A	C	G	A	G	C	G	G	G	A	G	A	G	A
2L	-	2L-3055763	FBti0024467	SUPor-P	CCATAGGG	AAGCCATAGGGTTT		A	A	G	C	C	A	T	A	G	G	G	T	T	T
2L	-	2L-3303303	FBti0023145	SUPor-P	TCCCAGAC	AGCTCCCAGACAAC		A	G	C	T	C	C	C	A	G	A	C	A	A	C
2L	-	2L-3354824	FBti0024182	SUPor-P	CCTAACAC	CTACCTAACACCTT		C	T	A	C	C	T	A	A	C	A	C	C	T	T
2L	-	2L-3354940	FBti0021608	SUPor-P	CTCTGGAT	TCCCTCTGGATTTA		T	C	C	C	T	C	T	G	G	A	T	T	T	A
2L	-	2L-3373354	FBti0039099	SUPor-P	CCTGTGAC	CCACCTGTGACGAC		C	C	A	C	C	T	G	T	G	A	C	G	A	C
2L	-	2L-3466057	FBti0023580	SUPor-P	GGCCTGCA	GACGGCCTGCAACT		G	A	C	G	G	C	C	T	G	C	A	A	C	T
2L	-	2L-3466137	FBti0023122	SUPor-P	CGCCAGAA	AAACGCCAGAACAA		A	A	A	C	G	C	C	A	G	A	A	C	A	A
2L	-	2L-3480059	FBti0024766	SUPor-P	GAAGTCGG	ATAGAAGTCGGCTA		A	T	A	G	A	A	G	T	C	G	G	C	T	A
2L	-	2L-3646165	FBti0023368	SUPor-P	AGGACAGG	AGGAGGACAGGTAA		A	G	G	A	G	G	A	C	A	G	G	T	A	A
2L	-	2L-3713595	FBti0021854	SUPor-P	CCCCACCC	CAACCCCACCCCTT		C	A	A	C	C	C	C	A	C	C	C	C	T	T
2L	-	2L-3787138	FBti0024148	SUPor-P	AACGGGGG	AAGAACGGGGGCGA		A	A	G	A	A	C	G	G	G	G	G	C	G	A
2L	-	2L-3789966	FBti0039105	SUPor-P	CTGCAGAG	CAACTGCAGAGCAG		C	A	A	C	T	G	C	A	G	A	G	C	A	G
2L	-	2L-3803807	FBti0039033	SUPor-P	GAGTACAA	AGGGAGTACAACAT		A	G	G	G	A	G	T	A	C	A	A	C	A	T
2L	-	2L-3991782	FBti0024552	SUPor-P	GGGCCGCT	ATAGGGCCGCTGGC		A	T	A	G	G	G	C	C	G	C	T	G	G	C
2L	-	2L-4056280	FBti0021405	SUPor-P	CTGTGAAA	AGACTGTGAAATGC		A	G	A	C	T	G	T	G	A	A	A	T	G	C
2L	-	2L-4103173	FBti0025022	SUPor-P	CCCACATA	ATCCCCACATATAT		A	T	C	C	C	C	A	C	A	T	A	T	A	T
2L	-	2L-4332075	FBti0023548	SUPor-P	GCACAAGT	ATGGCACAAGTAGT		A	T	G	G	C	A	C	A	A	G	T	A	G	T
2L	-	2L-4334254	FBti0025071	SUPor-P	GACCCGTG	TCCGACCCGTGGTA		T	C	C	G	A	C	C	C	G	T	G	G	T	A
2L	-	2L-4444713	FBti0018807	SUPor-P	GCATGGCC	ATAGCATGGCCGTT		A	T	A	G	C	A	T	G	G	C	C	G	T	T
2L	-	2L-4452960	FBti0021441	SUPor-P	CTCTAGAC	AGCCTCTAGACTGC		A	G	C	C	T	C	T	A	G	A	C	T	G	C
2L	-	2L-4459376	FBti0024147	SUPor-P	CTCCAGTG	TTGCTCCAGTGCTT		T	T	G	C	T	C	C	A	G	T	G	C	T	T
2L	-	2L-4670176	FBti0021827	SUPor-P	TGTTGGAG	AGATGTTGGAGCAA		A	G	A	T	G	T	T	G	G	A	G	C	A	A
2L	-	2L-4682768	FBti0018649	SUPor-P	CTGTAGGG	TGCCTGTAGGGCTT		T	G	C	C	T	G	T	A	G	G	G	C	T	T
2L	-	2L-4690680	FBti0021385	SUPor-P	ATAGGACC	TATATAGGACCGAA		T	A	T	A	T	A	G	G	A	C	C	G	A	A
2L	-	2L-4701105	FBti0024434	SUPor-P	GCACATCC	AGAGCACATCCCGT		A	G	A	G	C	A	C	A	T	C	C	C	G	T
2L	-	2L-4818197	FBti0024954	SUPor-P	AATTGACC	GCGAATTGACCAAT		G	C	G	A	A	T	T	G	A	C	C	A	A	T
2L	-	2L-4820858	FBti0018605	SUPor-P	GTTGGGGG	ACGGTTGGGGGGCA		A	C	G	G	T	T	G	G	G	G	G	G	C	A
2L	-	2L-4882661	FBti0024817	SUPor-P	GGCTCGAC	TTCGGCTCGACCGT		T	T	C	G	G	C	T	C	G	A	C	C	G	T
2L	-	2L-4883006	FBti0024503	SUPor-P	GGCTGCCC	TCTGGCTGCCCTGC		T	C	T	G	G	C	T	G	C	C	C	T	G	C
2L	-	2L-4955549	FBti0039067	SUPor-P	CTACTAAC	TAGCTACTAACCAA		T	A	G	C	T	A	C	T	A	A	C	C	A	A
2L	-	2L-4971685	FBti0025011	SUPor-P	GGCGGAGG	AGAGGCGGAGGCGT		A	G	A	G	G	C	G	G	A	G	G	C	G	T
2L	-	2L-5009709	FBti0023236	SUPor-P	CTTCGGCC	ATACTTCGGCCGTT		A	T	A	C	T	T	C	G	G	C	C	G	T	T
2L	-	2L-5055215	FBti0021354	SUPor-P	CGTGGGCG	ATACGTGGGCGGTT		A	T	A	C	G	T	G	G	G	C	G	G	T	T
2L	-	2L-5107678	FBti0018848	SUPor-P	AAACGTAC	AACAAACGTACGGA		A	A	C	A	A	A	C	G	T	A	C	G	G	A
2L	-	2L-5147685	FBti0021673	SUPor-P	GGTGGGCT	TTCGGTGGGCTCCA		T	T	C	G	G	T	G	G	G	C	T	C	C	A
2L	-	2L-5259281	FBti0021905	SUPor-P	GTGCGGCC	ACGGTGCGGCCTGC		A	C	G	G	T	G	C	G	G	C	C	T	G	C
2L	-	2L-5288966	FBti0023323	SUPor-P	GTATAGGA	ATAGTATAGGAGGT		A	T	A	G	T	A	T	A	G	G	A	G	G	T
2L	-	2L-5297085	FBti0038119	SUPor-P	GTCACATT	TTGGTCACATTTTC		T	T	G	G	T	C	A	C	A	T	T	T	T	C
2L	-	2L-5532138	FBti0023137	SUPor-P	GCTTGGGG	TCGGCTTGGGGCAA		T	C	G	G	C	T	T	G	G	G	G	C	A	A
2L	-	2L-5617948	FBti0024931	SUPor-P	CTCTGAGA	TCACTCTGAGACGC		T	C	A	C	T	C	T	G	A	G	A	C	G	C
2L	-	2L-5624181	FBti0021367	SUPor-P	AATCCCCC	TCGAATCCCCCCAT		T	C	G	A	A	T	C	C	C	C	C	C	A	T
2L	-	2L-5907456	FBti0024960	SUPor-P	GGATACAC	ATGGGATACACTCT		A	T	G	G	G	A	T	A	C	A	C	T	C	T
2L	-	2L-6027384	FBti0024806	SUPor-P	CGTCCACC	ACACGTCCACCGTC		A	C	A	C	G	T	C	C	A	C	C	G	T	C
2L	-	2L-6047950	FBti0023490	SUPor-P	GTTTGGTG	ATGGTTTGGTGTAA		A	T	G	G	T	T	T	G	G	T	G	T	A	A
2L	-	2L-6071093	FBti0024549	SUPor-P	AGCCAATG	TGAAGCCAATGCGA		T	G	A	A	G	C	C	A	A	T	G	C	G	A
2L	-	2L-6100701	FBti0021414	SUPor-P	TGCGGAAG	AGATGCGGAAGCAA		A	G	A	T	G	C	G	G	A	A	G	C	A	A
2L	-	2L-6179106	FBti0021908	SUPor-P	GTCTTAGG	AATGTCTTAGGTTT		A	A	T	G	T	C	T	T	A	G	G	T	T	T
2L	-	2L-6252967	FBti0023092	SUPor-P	ACCTGATC	GCCACCTGATCAGT		G	C	C	A	C	C	T	G	A	T	C	A	G	T
2L	-	2L-6673468	FBti0024442	SUPor-P	GTCCAGAC	GTCGTCCAGACCAG		G	T	C	G	T	C	C	A	G	A	C	C	A	G
2L	-	2L-6709283	FBti0024979	SUPor-P	GCCTTAAC	TTAGCCTTAACACT		T	T	A	G	C	C	T	T	A	A	C	A	C	T
2L	-	2L-6787005	FBti0018825	SUPor-P	GTCTAAGT	GAAGTCTAAGTTTT		G	A	A	G	T	C	T	A	A	G	T	T	T	T
2L	-	2L-6800867	FBti0021592	SUPor-P	GATAAGAG	GAGGATAAGAGTAC		G	A	G	G	A	T	A	A	G	A	G	T	A	C
2L	-	2L-6908099	FBti0023150	SUPor-P	CGCCGAAC	GAGCGCCGAACCAA		G	A	G	C	G	C	C	G	A	A	C	C	A	A
2L	-	2L-6939892	FBti0021650	SUPor-P	GTCCTGCC	ATCGTCCTGCCGAA		A	T	C	G	T	C	C	T	G	C	C	G	A	A
2L	-	2L-6945260	FBti0024935	SUPor-P	CGTCGGGG	ATCCGTCGGGGTTT		A	T	C	C	G	T	C	G	G	G	G	T	T	T
2L	-	2L-7010423	FBti0021564	SUPor-P	GGACAAGG	TTTGGACAAGGGAT		T	T	T	G	G	A	C	A	A	G	G	G	A	T
2L	-	2L-7161657	FBti0021651	SUPor-P	AGCGAGAG	GAAAGCGAGAGTAA		G	A	A	A	G	C	G	A	G	A	G	T	A	A
2L	-	2L-7184073	FBti0021799	SUPor-P	TTACGCTA	ATATTACGCTACAA		A	T	A	T	T	A	C	G	C	T	A	C	A	A
2L	-	2L-7188080	FBti0025101	SUPor-P	CCCCAGAT	AGCCCCCAGATTGT		A	G	C	C	C	C	C	A	G	A	T	T	G	T
2L	-	2L-7199855	FBti0023371	SUPor-P	TTTAAGAC	ATATTTAAGACCTT		A	T	A	T	T	T	A	A	G	A	C	C	T	T
2L	-	2L-7782431	FBti0023165	SUPor-P	GCCTGGCT	TTCGCCTGGCTCCA		T	T	C	G	C	C	T	G	G	C	T	C	C	A
2L	-	2L-7800102	FBti0039080	SUPor-P	CATCGACA	ATACATCGACAGCT		A	T	A	C	A	T	C	G	A	C	A	G	C	T
2L	-	2L-7885422	FBti0021640	SUPor-P	CTTCTGAC	ATACTTCTGACACA		A	T	A	C	T	T	C	T	G	A	C	A	C	A
2L	-	2L-7976904	FBti0024212	SUPor-P	CGTCGACA	ATACGTCGACAGCT		A	T	A	C	G	T	C	G	A	C	A	G	C	T
2L	-	2L-7977239	FBti0021801	SUPor-P	TATTGACC	TCGTATTGACCCAA		T	C	G	T	A	T	T	G	A	C	C	C	A	A
2L	-	2L-7994498	FBti0018652	SUPor-P	AGTTGGAC	TTCAGTTGGACACT		T	T	C	A	G	T	T	G	G	A	C	A	C	T
2L	-	2L-8127022	FBti0021252	SUPor-P	GCTGTCAC	CGTGCTGTCACTTT		C	G	T	G	C	T	G	T	C	A	C	T	T	T
2L	-	2L-8199022	FBti0024793	SUPor-P	ATTTAGCC	AAGATTTAGCCCCT		A	A	G	A	T	T	T	A	G	C	C	C	C	T
2L	-	2L-8403116	FBti0018610	SUPor-P	TGGCAAAC	GCGTGGCAAACGAG		G	C	G	T	G	G	C	A	A	A	C	G	A	G
2L	-	2L-8536364	FBti0021253	SUPor-P	AGCCAGAC	TTCAGCCAGACCCT		T	T	C	A	G	C	C	A	G	A	C	C	C	T
2L	-	2L-8950716	FBti0021549	SUPor-P	AGCCCATG	CTGAGCCCATGTAT		C	T	G	A	G	C	C	C	A	T	G	T	A	T
2L	-	2L-9437528	FBti0021204	SUPor-P	GGTTGGCC	CTGGGTTGGCCACT		C	T	G	G	G	T	T	G	G	C	C	A	C	T
2L	-	2L-9521695	FBti0021696	SUPor-P	GTCCGAAA	AAAGTCCGAAAACT		A	A	A	G	T	C	C	G	A	A	A	A	C	T
2L	-	2L-9571032	FBti0024768	SUPor-P	GTTTCGCG	ACTGTTTCGCGTAC		A	C	T	G	T	T	T	C	G	C	G	T	A	C
2L	-	2L-9618311	FBti0023333	SUPor-P	GGTCCCAC	CTTGGTCCCACTAA		C	T	T	G	G	T	C	C	C	A	C	T	A	A
2L	-	2L-9700840	FBti0024578	SUPor-P	GGTGTATG	ATGGGTGTATGAGT		A	T	G	G	G	T	G	T	A	T	G	A	G	T
2L	-	2L-9785519	FBti0023398	SUPor-P	GTACAGTG	AGTGTACAGTGTGT		A	G	T	G	T	A	C	A	G	T	G	T	G	T
2L	-	2L-9790716	FBti0023496	SUPor-P	CGCCAGGG	CCCCGCCAGGGCTG		C	C	C	C	G	C	C	A	G	G	G	C	T	G
2L	-	2L-9805953	FBti0023497	SUPor-P	CCGCAGAG	TCGCCGCAGAGTAT		T	C	G	C	C	G	C	A	G	A	G	T	A	T
2L	-	2L-9948232	FBti0021363	SUPor-P	GTTCACAC	TCTGTTCACACTGC		T	C	T	G	T	T	C	A	C	A	C	T	G	C
2L	-	2L-9967027	FBti0025018	SUPor-P	GTGCAGCA	TTAGTGCAGCAACA		T	T	A	G	T	G	C	A	G	C	A	A	C	A
2L	-	2L-9984543	FBti0025015	SUPor-P	CTTACGAC	AGGCTTACGACTAT		A	G	G	C	T	T	A	C	G	A	C	T	A	T
2L	-	2L-10207313	FBti0021928	SUPor-P	CAAAGTAA	AAACAAAGTAACAG		A	A	A	C	A	A	A	G	T	A	A	C	A	G
2L	-	2L-10220952	FBti0024517	SUPor-P	GACTAGGA	TAGGACTAGGACAA		T	A	G	G	A	C	T	A	G	G	A	C	A	A
2L	-	2L-10247020	FBti0023295	SUPor-P	AGCGGCAC	AGCAGCGGCACTTT		A	G	C	A	G	C	G	G	C	A	C	T	T	T
2L	-	2L-10250497	FBti0024141	SUPor-P	CCTCAGAC	CTGCCTCAGACCAA		C	T	G	C	C	T	C	A	G	A	C	C	A	A
2L	-	2L-10306941	FBti0021922	SUPor-P	ATCTGGTC	CTCATCTGGTCTAT		C	T	C	A	T	C	T	G	G	T	C	T	A	T
2L	-	2L-10321796	FBti0021660	SUPor-P	GTCCAAGC	ACCGTCCAAGCGCT		A	C	C	G	T	C	C	A	A	G	C	G	C	T
2L	-	2L-10335052	FBti0023218	SUPor-P	CTCACAAC	TATCTCACAACGAA		T	A	T	C	T	C	A	C	A	A	C	G	A	A
2L	-	2L-10341665	FBti0025067	SUPor-P	CCGTGGGG	ACACCGTGGGGCTT		A	C	A	C	C	G	T	G	G	G	G	C	T	T
2L	-	2L-10544883	FBti0021591	SUPor-P	CTTAGGGA	ATACTTAGGGATGA		A	T	A	C	T	T	A	G	G	G	A	T	G	A
2L	-	2L-10842619	FBti0025039	SUPor-P	GTCCCACC	TTGGTCCCACCTCT		T	T	G	G	T	C	C	C	A	C	C	T	C	T
2L	-	2L-10908860	FBti0024812	SUPor-P	GTCCGACA	ATCGTCCGACAACG		A	T	C	G	T	C	C	G	A	C	A	A	C	G
2L	-	2L-10966748	FBti0025054	SUPor-P	ACCTACGC	TCCACCTACGCTAT		T	C	C	A	C	C	T	A	C	G	C	T	A	T
2L	-	2L-11057405	FBti0021403	SUPor-P	TTCTCGTT	CTGTTCTCGTTGCT		C	T	G	T	T	C	T	C	G	T	T	G	C	T
2L	-	2L-11062205	FBti0023504	SUPor-P	CTCTGGTG	AAGCTCTGGTGCAT		A	A	G	C	T	C	T	G	G	T	G	C	A	T
2L	-	2L-11100903	FBti0023492	SUPor-P	GTTTGGTC	TATGTTTGGTCAAA		T	A	T	G	T	T	T	G	G	T	C	A	A	A
2L	-	2L-11120307	FBti0021372	SUPor-P	CATTTGCG	AAACATTTGCGCTT		A	A	A	C	A	T	T	T	G	C	G	C	T	T
2L	-	2L-11123641	FBti0021465	SUPor-P	GTTTCGCG	TTGGTTTCGCGTGT		T	T	G	G	T	T	T	C	G	C	G	T	G	T
2L	-	2L-11155742	FBti0021220	SUPor-P	CCCTTGGC	CTGCCCTTGGCTGT		C	T	G	C	C	C	T	T	G	G	C	T	G	T
2L	-	2L-11220247	FBti0023451	SUPor-P	GTTTAGTA	TTGGTTTAGTATTT		T	T	G	G	T	T	T	A	G	T	A	T	T	T
2L	-	2L-11516938	FBti0021658	SUPor-P	GGACGGTC	ATCGGACGGTCATC		A	T	C	G	G	A	C	G	G	T	C	A	T	C
2L	-	2L-11824576	FBti0021950	SUPor-P	GTCACGCC	TTGGTCACGCCCTT		T	T	G	G	T	C	A	C	G	C	C	C	T	T
2L	-	2L-12011788	FBti0024717	SUPor-P	CACAACAC	ATACACAACACTAC		A	T	A	C	A	C	A	A	C	A	C	T	A	C
2L	-	2L-12046133	FBti0023479	SUPor-P	GTCCATCG	TTCGTCCATCGCAT		T	T	C	G	T	C	C	A	T	C	G	C	A	T
2L	-	2L-12057782	FBti0018604	SUPor-P	ACACAGAC	AAAACACAGACGCA		A	A	A	A	C	A	C	A	G	A	C	G	C	A
2L	-	2L-12066814	FBti0024163	SUPor-P	AGGTAACC	GGAAGGTAACCATT		G	G	A	A	G	G	T	A	A	C	C	A	T	T
2L	-	2L-12134203	FBti0023473	SUPor-P	GTCTGGCC	TTAGTCTGGCCCAG		T	T	A	G	T	C	T	G	G	C	C	C	A	G
2L	-	2L-12434545	FBti0023102	SUPor-P	GCGCAGTC	TCAGCGCAGTCAAT		T	C	A	G	C	G	C	A	G	T	C	A	A	T
2L	-	2L-12444291	FBti0021893	SUPor-P	CTTTGATC	CGCCTTTGATCCAA		C	G	C	C	T	T	T	G	A	T	C	C	A	A
2L	-	2L-12446201	FBti0021537	SUPor-P	CCCCACAC	ATACCCCACACCTG		A	T	A	C	C	C	C	A	C	A	C	C	T	G
2L	-	2L-12461291	FBti0023568	SUPor-P	GACCGTAG	GTAGACCGTAGCTT		G	T	A	G	A	C	C	G	T	A	G	C	T	T
2L	-	2L-12483281	FBti0021624	SUPor-P	ATCTGTAC	GACATCTGTACATA		G	A	C	A	T	C	T	G	T	A	C	A	T	A
2L	-	2L-12529458	FBti0021609	SUPor-P	CCGTACCG	TTACCGTACCGTAT		T	T	A	C	C	G	T	A	C	C	G	T	A	T
2L	-	2L-12540135	FBti0024481	SUPor-P	GTCTGACG	TCCGTCTGACGTAA		T	C	C	G	T	C	T	G	A	C	G	T	A	A
2L	-	2L-12544083	FBti0024720	SUPor-P	CCTGGCAC	TTCCCTGGCACTAG		T	T	C	C	C	T	G	G	C	A	C	T	A	G
2L	-	2L-12610069	FBti0023241	SUPor-P	CCCTCAGC	AACCCCTCAGCGCA		A	A	C	C	C	C	T	C	A	G	C	G	C	A
2L	-	2L-12692173	FBti0025016	SUPor-P	CATCGTCG	TATCATCGTCGTCT		T	A	T	C	A	T	C	G	T	C	G	T	C	T
2L	-	2L-12722327	FBti0024660	SUPor-P	GTCTATGC	TTTGTCTATGCTTT		T	T	T	G	T	C	T	A	T	G	C	T	T	T
2L	-	2L-12854856	FBti0023163	SUPor-P	CTGCAGGG	CTACTGCAGGGCTT		C	T	A	C	T	G	C	A	G	G	G	C	T	T
2L	-	2L-13192383	FBti0021641	SUPor-P	ATACATAC	TAAATACATACATA		T	A	A	A	T	A	C	A	T	A	C	A	T	A
2L	-	2L-13233412	FBti0024662	SUPor-P	GGCTGCTC	AAGGGCTGCTCCTT		A	A	G	G	G	C	T	G	C	T	C	C	T	T
2L	-	2L-13286476	FBti0025058	SUPor-P	GCCCACGC	CCCGCCCACGCCAT		C	C	C	G	C	C	C	A	C	G	C	C	A	T
2L	-	2L-13290779	FBti0023341	SUPor-P	GTGTGAAT	AACGTGTGAATTAA		A	A	C	G	T	G	T	G	A	A	T	T	A	A
2L	-	2L-13296302	FBti0024465	SUPor-P	ATCGGCGC	TATATCGGCGCTTA		T	A	T	A	T	C	G	G	C	G	C	T	T	A
2L	-	2L-13370964	FBti0024971	SUPor-P	ATGTGAGC	TTCATGTGAGCTAA		T	T	C	A	T	G	T	G	A	G	C	T	A	A
2L	-	2L-13549355	FBti0021449	SUPor-P	GCTCCACA	AAAGCTCCACAGAT		A	A	A	G	C	T	C	C	A	C	A	G	A	T
2L	-	2L-13717159	FBti0021298	SUPor-P	CCTTTACA	TTACCTTTACACTT		T	T	A	C	C	T	T	T	A	C	A	C	T	T
2L	-	2L-13835600	FBti0021285	SUPor-P	CACTGTAC	GTGCACTGTACCGT		G	T	G	C	A	C	T	G	T	A	C	C	G	T
2L	-	2L-13878189	FBti0018782	SUPor-P	GTCCGTCC	AAAGTCCGTCCGCA		A	A	A	G	T	C	C	G	T	C	C	G	C	A
2L	-	2L-14001282	FBti0024457	SUPor-P	GATTGGTT	TTCGATTGGTTCTT		T	T	C	G	A	T	T	G	G	T	T	C	T	T
2L	-	2L-14367201	FBti0023582	SUPor-P	ACAGCACC	ATAACAGCACCGCT		A	T	A	A	C	A	G	C	A	C	C	G	C	T
2L	-	2L-14490494	FBti0023349	SUPor-P	GGCAGGGC	AGAGGCAGGGCGAT		A	G	A	G	G	C	A	G	G	G	C	G	A	T
2L	-	2L-14616505	FBti0023167	SUPor-P	GTTCGCAC	TCAGTTCGCACCAA		T	C	A	G	T	T	C	G	C	A	C	C	A	A
2L	-	2L-14689342	FBti0025040	SUPor-P	CCTGAAAC	ATGCCTGAAACGAA		A	T	G	C	C	T	G	A	A	A	C	G	A	A
2L	-	2L-15074483	FBti0024613	SUPor-P	GATGGACG	TCAGATGGACGATA		T	C	A	G	A	T	G	G	A	C	G	A	T	A
2L	-	2L-15113496	FBti0021460	SUPor-P	GTTCCGAG	ATGGTTCCGAGTTT		A	T	G	G	T	T	C	C	G	A	G	T	T	T
2L	-	2L-15202276	FBti0023099	SUPor-P	GCCCTGGT	ACAGCCCTGGTCGT		A	C	A	G	C	C	C	T	G	G	T	C	G	T
2L	-	2L-15460560	FBti0024195	SUPor-P	AAAGGTTA	GTGAAAGGTTACTC		G	T	G	A	A	A	G	G	T	T	A	C	T	C
2L	-	2L-15492130	FBti0024632	SUPor-P	GTCGCAGC	TTCGTCGCAGCATT		T	T	C	G	T	C	G	C	A	G	C	A	T	T
2L	-	2L-15763136	FBti0024701	SUPor-P	CAGCAGCA	CAGCAGCAGCAAAA		C	A	G	C	A	G	C	A	G	C	A	A	A	A
2L	-	2L-16042859	FBti0025103	SUPor-P	GTACAGAC	AGAGTACAGACGAA		A	G	A	G	T	A	C	A	G	A	C	G	A	A
2L	-	2L-16277021	FBti0024255	SUPor-P	CCATGTGG	AGTCCATGTGGTAA		A	G	T	C	C	A	T	G	T	G	G	T	A	A
2L	-	2L-16310686	FBti0020883	SUPor-P	AGCTGTAT	ATCAGCTGTATGCT		A	T	C	A	G	C	T	G	T	A	T	G	C	T
2L	-	2L-16325121	FBti0024669	SUPor-P	GACGAGAT	TGCGACGAGATGCT		T	G	C	G	A	C	G	A	G	A	T	G	C	T
2L	-	2L-16325944	FBti0020927	SUPor-P	TTATCGGC	AGGTTATCGGCATA		A	G	G	T	T	A	T	C	G	G	C	A	T	A
2L	-	2L-16545855	FBti0018786	SUPor-P	TGCCATTG	TGCTGCCATTGATC		T	G	C	T	G	C	C	A	T	T	G	A	T	C
2L	-	2L-16791522	FBti0020882	SUPor-P	TATCAGAC	GCTTATCAGACTTA		G	C	T	T	A	T	C	A	G	A	C	T	T	A
2L	-	2L-16791608	FBti0024612	SUPor-P	GGTCTACG	AGCGGTCTACGCTT		A	G	C	G	G	T	C	T	A	C	G	C	T	T
2L	-	2L-16816700	FBti0024984	SUPor-P	GGTTGAGC	TCAGGTTGAGCAGT		T	C	A	G	G	T	T	G	A	G	C	A	G	T
2L	-	2L-16886564	FBti0021382	SUPor-P	GTGGGTAC	AGCGTGGGTACATT		A	G	C	G	T	G	G	G	T	A	C	A	T	T
2L	-	2L-17017452	FBti0024738	SUPor-P	ATTCGAAC	TAAATTCGAACAAA		T	A	A	A	T	T	C	G	A	A	C	A	A	A
2L	-	2L-17260779	FBti0021282	SUPor-P	GTCATGGT	CTTGTCATGGTCGA		C	T	T	G	T	C	A	T	G	G	T	C	G	A
2L	-	2L-17335652	FBti0025036	SUPor-P	TTTTCACC	CAATTTTCACCCTA		C	A	A	T	T	T	T	C	A	C	C	C	T	A
2L	-	2L-17384857	FBti0024570	SUPor-P	CGTTGGCT	GTGCGTTGGCTTTA		G	T	G	C	G	T	T	G	G	C	T	T	T	A
2L	-	2L-17386981	FBti0024697	SUPor-P	GGCAATCC	ATAGGCAATCCCAA		A	T	A	G	G	C	A	A	T	C	C	C	A	A
2L	-	2L-17411208	FBti0024537	SUPor-P	CCAGGGAC	ATCCCAGGGACTGT		A	T	C	C	C	A	G	G	G	A	C	T	G	T
2L	-	2L-17449872	FBti0024579	SUPor-P	ATTTTAGC	TCAATTTTAGCTAA		T	C	A	A	T	T	T	T	A	G	C	T	A	A
2L	-	2L-17474585	FBti0023136	SUPor-P	GCCTGTAC	AGCGCCTGTACGTG		A	G	C	G	C	C	T	G	T	A	C	G	T	G
2L	-	2L-17497223	FBti0021692	SUPor-P	AGTTGGAC	GCGAGTTGGACGCG		G	C	G	A	G	T	T	G	G	A	C	G	C	G
2L	-	2L-17498020	FBti0025061	SUPor-P	GGCTGGGA	AATGGCTGGGACTT		A	A	T	G	G	C	T	G	G	G	A	C	T	T
2L	-	2L-17501137	FBti0024528	SUPor-P	ACTCGAAT	AATACTCGAATACT		A	A	T	A	C	T	C	G	A	A	T	A	C	T
2L	-	2L-17594290	FBti0023105	SUPor-P	CGCACAGC	TTCCGCACAGCCAA		T	T	C	C	G	C	A	C	A	G	C	C	A	A
2L	-	2L-18032928	FBti0023505	SUPor-P	ATTCAGCC	AGCATTCAGCCTAT		A	G	C	A	T	T	C	A	G	C	C	T	A	T
2L	-	2L-18046995	FBti0023139	SUPor-P	GTCCGATA	GCAGTCCGATATAA		G	C	A	G	T	C	C	G	A	T	A	T	A	A
2L	-	2L-18138070	FBti0021293	SUPor-P	TTCGAGGC	TCTTTCGAGGCTTT		T	C	T	T	T	C	G	A	G	G	C	T	T	T
2L	-	2L-18339223	FBti0023385	SUPor-P	CCTTGGCT	ATGCCTTGGCTGCA		A	T	G	C	C	T	T	G	G	C	T	G	C	A
2L	-	2L-18454686	FBti0021230	SUPor-P	GTCGTGGC	ATTGTCGTGGCACT		A	T	T	G	T	C	G	T	G	G	C	A	C	T
2L	-	2L-18951808	FBti0021750	SUPor-P	GCCGTGAT	AATGCCGTGATAGA		A	A	T	G	C	C	G	T	G	A	T	A	G	A
2L	-	2L-18987245	FBti0024734	SUPor-P	GTCCCGAC	TGGGTCCCGACCAA		T	G	G	G	T	C	C	C	G	A	C	C	A	A
2L	-	2L-19003398	FBti0021861	SUPor-P	TACCGAAG	AAATACCGAAGTAT		A	A	A	T	A	C	C	G	A	A	G	T	A	T
2L	-	2L-19021806	FBti0023330	SUPor-P	GGCCAGAG	TCGGGCCAGAGCTT		T	C	G	G	G	C	C	A	G	A	G	C	T	T
2L	-	2L-19033500	FBti0023322	SUPor-P	AACTGGCC	ACCAACTGGCCCAC		A	C	C	A	A	C	T	G	G	C	C	C	A	C
2L	-	2L-19035036	FBti0025115	SUPor-P	TAAATAAT	ATATAAATAATCAA		A	T	A	T	A	A	A	T	A	A	T	C	A	A
2L	-	2L-19077420	FBti0021581	SUPor-P	GGCTGCAC	AAAGGCTGCACTGT		A	A	A	G	G	C	T	G	C	A	C	T	G	T
2L	-	2L-19174931	FBti0023093	SUPor-P	GTATAGCC	TGTGTATAGCCATT		T	G	T	G	T	A	T	A	G	C	C	A	T	T
2L	-	2L-19490026	FBti0024629	SUPor-P	GAGGGGGA	TTTGAGGGGGATGG		T	T	T	G	A	G	G	G	G	G	A	T	G	G
2L	-	2L-19493185	FBti0023114	SUPor-P	GTTCAGTG	GCCGTTCAGTGAAT		G	C	C	G	T	T	C	A	G	T	G	A	A	T
2L	-	2L-19517629	FBti0021766	SUPor-P	GGCCAAGT	AGGGGCCAAGTACA		A	G	G	G	G	C	C	A	A	G	T	A	C	A
2L	-	2L-19561748	FBti0021775	SUPor-P	ACTGCGCC	CACACTGCGCCTGA		C	A	C	A	C	T	G	C	G	C	C	T	G	A
2L	-	2L-19735906	FBti0021738	SUPor-P	GCTCTGGG	CTGGCTCTGGGCTT		C	T	G	G	C	T	C	T	G	G	G	C	T	T
2L	-	2L-19811975	FBti0024830	SUPor-P	GCCTAGTT	TCAGCCTAGTTTAT		T	C	A	G	C	C	T	A	G	T	T	T	A	T
2L	-	2L-19812672	FBti0024520	SUPor-P	TGCTGCCT	TTCTGCTGCCTCAT		T	T	C	T	G	C	T	G	C	C	T	C	A	T
2L	-	2L-19832055	FBti0023331	SUPor-P	GCCCAGTG	CTCGCCCAGTGATA		C	T	C	G	C	C	C	A	G	T	G	A	T	A
2L	-	2L-20082702	FBti0023508	SUPor-P	CTCCATGC	GTGCTCCATGCCAT		G	T	G	C	T	C	C	A	T	G	C	C	A	T
2L	-	2L-20098031	FBti0018815	SUPor-P	GGTGGTAC	AATGGTGGTACATG		A	A	T	G	G	T	G	G	T	A	C	A	T	G
2L	-	2L-20115984	FBti0024477	SUPor-P	GGCGGTGC	TTCGGCGGTGCGAT		T	T	C	G	G	C	G	G	T	G	C	G	A	T
2L	-	2L-20117855	FBti0018637	SUPor-P	GTCGGACG	ATAGTCGGACGGTT		A	T	A	G	T	C	G	G	A	C	G	G	T	T
2L	-	2L-20120593	FBti0021554	SUPor-P	GTGGGTTC	GTGGTGGGTTCGGT		G	T	G	G	T	G	G	G	T	T	C	G	G	T
2L	-	2L-20205332	FBti0023501	SUPor-P	CTTCCTGT	AGGCTTCCTGTGCT		A	G	G	C	T	T	C	C	T	G	T	G	C	T
2L	-	2L-20382383	FBti0024785	SUPor-P	AACTCGAC	AACAACTCGACATA		A	A	C	A	A	C	T	C	G	A	C	A	T	A
2L	-	2L-20417355	FBti0023148	SUPor-P	TGCTGGCA	TGCTGCTGGCAAAA		T	G	C	T	G	C	T	G	G	C	A	A	A	A
2L	-	2L-20426177	FBti0024667	SUPor-P	GACTGCAC	TCGGACTGCACACA		T	C	G	G	A	C	T	G	C	A	C	A	C	A
2L	-	2L-20427046	FBti0021892	SUPor-P	AGCCCAAG	ATAAGCCCAAGCAA		A	T	A	A	G	C	C	C	A	A	G	C	A	A
2L	-	2L-20656153	FBti0021826	SUPor-P	CTCTGGAC	TAACTCTGGACACA		T	A	A	C	T	C	T	G	G	A	C	A	C	A
2L	-	2L-20675811	FBti0024192	SUPor-P	TCCGCGCC	AAATCCGCGCCTAA		A	A	A	T	C	C	G	C	G	C	C	T	A	A
2L	-	2L-20757855	FBti0021336	SUPor-P	CAGCTGAT	ACGCAGCTGATGAT		A	C	G	C	A	G	C	T	G	A	T	G	A	T
2L	-	2L-20800757	FBti0024471	SUPor-P	GGGGGACA	TTAGGGGGACACCA		T	T	A	G	G	G	G	G	A	C	A	C	C	A
2L	-	2L-20808226	FBti0025025	SUPor-P	GTTTAAAC	CTTGTTTAAACAAT		C	T	T	G	T	T	T	A	A	A	C	A	A	T
2L	-	2L-20830062	FBti0024151	SUPor-P	GTCTTTTC	AAGGTCTTTTCTGT		A	A	G	G	T	C	T	T	T	T	C	T	G	T
2L	-	2L-20838459	FBti0024819	SUPor-P	GGCCAATC	TTGGGCCAATCTAA		T	T	G	G	G	C	C	A	A	T	C	T	A	A
2L	-	2L-20865228	FBti0021649	SUPor-P	GTACAGAT	GTTGTACAGATGTG		G	T	T	G	T	A	C	A	G	A	T	G	T	G
2L	-	2L-20869901	FBti0021664	SUPor-P	GGTCGGGG	TGTGGTCGGGGTGG		T	G	T	G	G	T	C	G	G	G	G	T	G	G
2L	-	2L-21002382	FBti0023425	SUPor-P	CTCCAGTT	TTACTCCAGTTGGA		T	T	A	C	T	C	C	A	G	T	T	G	G	A
2L	-	2L-21089188	FBti0025089	SUPor-P	ACCGCCAC	TCAACCGCCACTTT		T	C	A	A	C	C	G	C	C	A	C	T	T	T
2L	-	2L-21089521	FBti0024621	SUPor-P	GTTCACAA	ACAGTTCACAATGC		A	C	A	G	T	T	C	A	C	A	A	T	G	C
2L	-	2L-21105206	FBti0023234	SUPor-P	CATATTTT	AAGCATATTTTACC		A	A	G	C	A	T	A	T	T	T	T	A	C	C
2L	-	2L-21108163	FBti0023308	SUPor-P	GGCGGAGC	GTCGGCGGAGCTCG		G	T	C	G	G	C	G	G	A	G	C	T	C	G
2L	-	2L-21109910	FBti0021523	SUPor-P	GCTCAGTT	TCAGCTCAGTTGAT		T	C	A	G	C	T	C	A	G	T	T	G	A	T
2L	-	2L-21147628	FBti0025090	SUPor-P	GGCCAACC	TTTGGCCAACCTCT		T	T	T	G	G	C	C	A	A	C	C	T	C	T
2L	-	2L-21151324	FBti0023600	SUPor-P	GCTGCCAC	AATGCTGCCACTTC		A	A	T	G	C	T	G	C	C	A	C	T	T	C
2L	-	2L-21202805	FBti0024230	SUPor-P	AGGCAACC	GTAAGGCAACCGCC		G	T	A	A	G	G	C	A	A	C	C	G	C	C
2L	-	2L-21204927	FBti0020890	SUPor-P	AGCAGCTG	GGCAGCAGCTGTTT		G	G	C	A	G	C	A	G	C	T	G	T	T	T
2L	-	2L-21234927	FBti0024540	SUPor-P	CTTTGTGG	ATACTTTGTGGGGT		A	T	A	C	T	T	T	G	T	G	G	G	G	T
2L	-	2L-21309243	FBti0021407	SUPor-P	CTCTCGTT	ACACTCTCGTTCCT		A	C	A	C	T	C	T	C	G	T	T	C	C	T
2L	-	2L-21328626	FBti0023321	SUPor-P	GTCTAAAC	AGCGTCTAAACATA		A	G	C	G	T	C	T	A	A	A	C	A	T	A
2L	-	2L-21331662	FBti0021726	SUPor-P	GTCGCAAT	TAAGTCGCAATTGG		T	A	A	G	T	C	G	C	A	A	T	T	G	G
2L	-	2L-21401023	FBti0018806	SUPor-P	GTATTACC	ACTGTATTACCCAT		A	C	T	G	T	A	T	T	A	C	C	C	A	T
2L	-	2L-21558325	FBti0024464	SUPor-P	CCTCGGCG	ACACCTCGGCGCAA		A	C	A	C	C	T	C	G	G	C	G	C	A	A
2L	-	2L-21623657	FBti0018801	SUPor-P	GGCAGCAG	ACGGGCAGCAGTGA		A	C	G	G	G	C	A	G	C	A	G	T	G	A
2L	-	2L-21656340	FBti0024550	SUPor-P	ACCCAGCC	AAGACCCAGCCCAA		A	A	G	A	C	C	C	A	G	C	C	C	A	A
2L	-	2L-21677249	FBti0021380	SUPor-P	GTTCCGAG	TGGGTTCCGAGTCC		T	G	G	G	T	T	C	C	G	A	G	T	C	C
2L	-	2L-21682145	FBti0023118	SUPor-P	CCCCGATA	ATGCCCCGATAGGT		A	T	G	C	C	C	C	G	A	T	A	G	G	T
2L	-	2L-21690526	FBti0023312	SUPor-P	GACTGTGC	TGCGACTGTGCAAC		T	G	C	G	A	C	T	G	T	G	C	A	A	C
2L	-	2L-21708213	FBti0024176	SUPor-P	GGTTGAGC	TGCGGTTGAGCTTT		T	G	C	G	G	T	T	G	A	G	C	T	T	T
2L	-	2L-21758071	FBti0021675	SUPor-P	GTGCGAGG	TCAGTGCGAGGCAT		T	C	A	G	T	G	C	G	A	G	G	C	A	T
2L	-	2L-21795549	FBti0021233	SUPor-P	GTCTGGCC	AACGTCTGGCCAGC		A	A	C	G	T	C	T	G	G	C	C	A	G	C
2L	-	2L-21863719	FBti0024802	SUPor-P	GGCTACAC	ACAGGCTACACACG		A	C	A	G	G	C	T	A	C	A	C	A	C	G
2L	-	2L-21980233	FBti0024454	SUPor-P	GTACCACC	TTAGTACCACCGCC		T	T	A	G	T	A	C	C	A	C	C	G	C	C
2L	-	2L-22019296	FBti0020904	SUPor-P	GCATGGAT	ACAGCATGGATGTT		A	C	A	G	C	A	T	G	G	A	T	G	T	T
2L	-	2L-22043843	FBti0021888	SUPor-P	ATTCAGAG	TTGATTCAGAGTTT		T	T	G	A	T	T	C	A	G	A	G	T	T	T
2L	-	2L-22074616	FBti0021870	SUPor-P	GGCTGTGC	ATAGGCTGTGCACG		A	T	A	G	G	C	T	G	T	G	C	A	C	G
2L	-	2L-22078760	FBti0021764	SUPor-P	GTCCCAAG	ACTGTCCCAAGTCT		A	C	T	G	T	C	C	C	A	A	G	T	C	T
2L	-	2L-22107260	FBti0021234	SUPor-P	GTCCGAAC	TAAGTCCGAACGAC		T	A	A	G	T	C	C	G	A	A	C	G	A	C
2L	-	2L-22117782	FBti0021949	SUPor-P	GCTCCGCG	TTCGCTCCGCGGAT		T	T	C	G	C	T	C	C	G	C	G	G	A	T
2L	-	2L-22121158	FBti0023579	SUPor-P	GTGTATGT	TTTGTGTATGTATT		T	T	T	G	T	G	T	A	T	G	T	A	T	T
2L	-	2L-22146488	FBti0023524	SUPor-P	GTTCCGCC	TTTGTTCCGCCGAT		T	T	T	G	T	T	C	C	G	C	C	G	A	T
2L	-	2L-22149037	FBti0021779	SUPor-P	CTACACAC	TACCTACACACCAA		T	A	C	C	T	A	C	A	C	A	C	C	A	A
2L	-	2L-22152023	FBti0024824	SUPor-P	GTCTGTCG	TTCGTCTGTCGTGT		T	T	C	G	T	C	T	G	T	C	G	T	G	T
2L	-	2L-22154059	FBti0021532	SUPor-P	GTCCAAAG	TTCGTCCAAAGATA		T	T	C	G	T	C	C	A	A	A	G	A	T	A
2L	-	2L-22169134	FBti0023311	SUPor-P	ACTCGGAC	GCCACTCGGACGAA		G	C	C	A	C	T	C	G	G	A	C	G	A	A
2L	-	2L-22178766	FBti0023446	SUPor-P	GTAACACC	TTAGTAACACCGAA		T	T	A	G	T	A	A	C	A	C	C	G	A	A
2L	-	2L-22219380	FBti0021371	SUPor-P	ATCTGGCA	TACATCTGGCACAA		T	A	C	A	T	C	T	G	G	C	A	C	A	A
2L	-	2L-22251289	FBti0024592	SUPor-P	CTTTACCT	TTACTTTACCTGCT		T	T	A	C	T	T	T	A	C	C	T	G	C	T
2L	-	2L-22441775	FBti0039037	SUPor-P	CTGTGGCC	TAACTGTGGCCCAA		T	A	A	C	T	G	T	G	G	C	C	C	A	A
2L	-	2L-22654978	FBti0024610	SUPor-P	GCATCGGT	TTAGCATCGGTATA		T	T	A	G	C	A	T	C	G	G	T	A	T	A
2L	-	2L-22959979	FBti0039036	SUPor-P	GTTCACGG	TCGGTTCACGGCAT		T	C	G	G	T	T	C	A	C	G	G	C	A	T
2R	-	2R-617998	FBti0024748	SUPor-P	GGCGGGCA	CAAGGCGGGCAAAA		C	A	A	G	G	C	G	G	G	C	A	A	A	A
2R	-	2R-1138544	FBti0039089	SUPor-P	GCTAGGCG	TGTGCTAGGCGCGT		T	G	T	G	C	T	A	G	G	C	G	C	G	T
2R	-	2R-1390723	FBti0021535	SUPor-P	GGCTGGCC	ACGGGCTGGCCTAT		A	C	G	G	G	C	T	G	G	C	C	T	A	T
2R	-	2R-1403520	FBti0023194	SUPor-P	GGACGGAA	AGCGGACGGAATTT		A	G	C	G	G	A	C	G	G	A	A	T	T	T
2R	-	2R-1550272	FBti0025113	SUPor-P	GACCAGGC	TTCGACCAGGCCAA		T	T	C	G	A	C	C	A	G	G	C	C	A	A
2R	-	2R-1569082	FBti0021918	SUPor-P	GTCCAGCC	CTCGTCCAGCCGTT		C	T	C	G	T	C	C	A	G	C	C	G	T	T
2R	-	2R-1644921	FBti0020893	SUPor-P	GTTCGGGG	CCCGTTCGGGGGGT		C	C	C	G	T	T	C	G	G	G	G	G	G	T
2R	-	2R-1647406	FBti0023156	SUPor-P	GGCGGAAT	AACGGCGGAATTAA		A	A	C	G	G	C	G	G	A	A	T	T	A	A
2R	-	2R-1669919	FBti0020926	SUPor-P	GAAATATC	TTCGAAATATCTCA		T	T	C	G	A	A	A	T	A	T	C	T	C	A
2R	-	2R-1881177	FBti0021718	SUPor-P	TGCTAGTG	TGCTGCTAGTGTTT		T	G	C	T	G	C	T	A	G	T	G	T	T	T
2R	-	2R-1923461	FBti0039028	SUPor-P	GTCTGCGG	CTCGTCTGCGGTCG		C	T	C	G	T	C	T	G	C	G	G	T	C	G
2R	-	2R-1927875	FBti0025311	SUPor-P	GTACAGAC	ACAGTACAGACACG		A	C	A	G	T	A	C	A	G	A	C	A	C	G
2R	-	2R-2083821	FBti0021706	SUPor-P	ATGCAGGG	TAAATGCAGGGTGA		T	A	A	A	T	G	C	A	G	G	G	T	G	A
2R	-	2R-2104514	FBti0024800	SUPor-P	CGTCATCC	TAACGTCATCCATA		T	A	A	C	G	T	C	A	T	C	C	A	T	A
2R	-	2R-2109617	FBti0021434	SUPor-P	GTTGGGCC	TTCGTTGGGCCGAA		T	T	C	G	T	T	G	G	G	C	C	G	A	A
2R	-	2R-2123633	FBti0023412	SUPor-P	TCTTGGTG	TTGTCTTGGTGGGA		T	T	G	T	C	T	T	G	G	T	G	G	G	A
2R	-	2R-2129522	FBti0024964	SUPor-P	GACGGACA	ATCGACGGACAAGC		A	T	C	G	A	C	G	G	A	C	A	A	G	C
2R	-	2R-2160357	FBti0039056	SUPor-P	GGGCAAAA	AATGGGCAAAAGAA		A	A	T	G	G	G	C	A	A	A	A	G	A	A
2R	-	2R-2493269	FBti0025119	SUPor-P	GTCTGGTA	CACGTCTGGTAAAA		C	A	C	G	T	C	T	G	G	T	A	A	A	A
2R	-	2R-2500700	FBti0023337	SUPor-P	GTCCACCT	ATAGTCCACCTCTA		A	T	A	G	T	C	C	A	C	C	T	C	T	A
2R	-	2R-2560820	FBti0021547	SUPor-P	ATAAAGGA	TCAATAAAGGACCA		T	C	A	A	T	A	A	A	G	G	A	C	C	A
2R	-	2R-2599653	FBti0021210	SUPor-P	GTTCTGCA	TCAGTTCTGCAATT		T	C	A	G	T	T	C	T	G	C	A	A	T	T
2R	-	2R-2602944	FBti0021835	SUPor-P	ATATAATT	AACATATAATTGCA		A	A	C	A	T	A	T	A	A	T	T	G	C	A
2R	-	2R-2880443	FBti0021910	SUPor-P	AGCAAGGC	GAGAGCAAGGCCGT		G	A	G	A	G	C	A	A	G	G	C	C	G	T
2R	-	2R-2912934	FBti0021552	SUPor-P	GGCTGCAT	CAGGGCTGCATAGT		C	A	G	G	G	C	T	G	C	A	T	A	G	T
2R	-	2R-2933224	FBti0021708	SUPor-P	GCCAGGAG	AGCGCCAGGAGATT		A	G	C	G	C	C	A	G	G	A	G	A	T	T
2R	-	2R-2949176	FBti0021695	SUPor-P	GATCAAAC	ATCGATCAAACAAA		A	T	C	G	A	T	C	A	A	A	C	A	A	A
2R	-	2R-3019828	FBti0024222	SUPor-P	CGCTTAAT	AATCGCTTAATAAA		A	A	T	C	G	C	T	T	A	A	T	A	A	A
2R	-	2R-3136467	FBti0021705	SUPor-P	GTTTTGCC	TTTGTTTTGCCAAT		T	T	T	G	T	T	T	T	G	C	C	A	A	T
2R	-	2R-3260094	FBti0039085	SUPor-P	GTCTGAAC	AGGGTCTGAACAAT		A	G	G	G	T	C	T	G	A	A	C	A	A	T
2R	-	2R-3269103	FBti0018781	SUPor-P	CTTTGAAT	ATTCTTTGAATCCT		A	T	T	C	T	T	T	G	A	A	T	C	C	T
2R	-	2R-3274962	FBti0018636	SUPor-P	GTCTGCCT	GCAGTCTGCCTTCC		G	C	A	G	T	C	T	G	C	C	T	T	C	C
2R	-	2R-3379885	FBti0023182	SUPor-P	CCAAAAAA	AGCCCAAAAAAAAG		A	G	C	C	C	A	A	A	A	A	A	A	A	G
2R	-	2R-3380624	FBti0021787	SUPor-P	GATCAGCT	GAAGATCAGCTACA		G	A	A	G	A	T	C	A	G	C	T	A	C	A
2R	-	2R-3419384	FBti0023144	SUPor-P	GGCTGGAC	ACTGGCTGGACTGA		A	C	T	G	G	C	T	G	G	A	C	T	G	A
2R	-	2R-3474575	FBti0018778	SUPor-P	GTTCGGCG	TCGGTTCGGCGCTT		T	C	G	G	T	T	C	G	G	C	G	C	T	T
2R	-	2R-3623158	FBti0024985	SUPor-P	CAATCAAC	AAACAATCAACAGT		A	A	A	C	A	A	T	C	A	A	C	A	G	T
2R	-	2R-3667908	FBti0024492	SUPor-P	GCACCACG	AGCGCACCACGCAT		A	G	C	G	C	A	C	C	A	C	G	C	A	T
2R	-	2R-3694024	FBti0024186	SUPor-P	GTCTGAGT	TTGGTCTGAGTCCG		T	T	G	G	T	C	T	G	A	G	T	C	C	G
2R	-	2R-3700197	FBti0039069	SUPor-P	ACTACAAC	CCAACTACAACCAT		C	C	A	A	C	T	A	C	A	A	C	C	A	T
2R	-	2R-3828043	FBti0021398	SUPor-P	GTCCGTAG	TTTGTCCGTAGAAC		T	T	T	G	T	C	C	G	T	A	G	A	A	C
2R	-	2R-3843036	FBti0024799	SUPor-P	TGGGGGCC	TACTGGGGGCCCCT		T	A	C	T	G	G	G	G	G	C	C	C	C	T
2R	-	2R-3849586	FBti0021783	SUPor-P	GGCGAGGC	AATGGCGAGGCGAA		A	A	T	G	G	C	G	A	G	G	C	G	A	A
2R	-	2R-3948961	FBti0021287	SUPor-P	AGATGGCC	CAGAGATGGCCTGT		C	A	G	A	G	A	T	G	G	C	C	T	G	T
2R	-	2R-3956154	FBti0024210	SUPor-P	AATCAGAC	GTGAATCAGACGAT		G	T	G	A	A	T	C	A	G	A	C	G	A	T
2R	-	2R-3969694	FBti0021713	SUPor-P	GTTCGTGG	TCCGTTCGTGGTGA		T	C	C	G	T	T	C	G	T	G	G	T	G	A
2R	-	2R-3986583	FBti0024774	SUPor-P	TTTACGTG	CAATTTACGTGTAA		C	A	A	T	T	T	A	C	G	T	G	T	A	A
2R	-	2R-4009931	FBti0021395	SUPor-P	CGCTGAAG	TATCGCTGAAGTGG		T	A	T	C	G	C	T	G	A	A	G	T	G	G
2R	-	2R-4017820	FBti0021269	SUPor-P	CATCAGTG	GTTCATCAGTGTAT		G	T	T	C	A	T	C	A	G	T	G	T	A	T
2R	-	2R-4019606	FBti0021188	SUPor-P	GATGGACC	AAGGATGGACCGCT		A	A	G	G	A	T	G	G	A	C	C	G	C	T
2R	-	2R-4061645	FBti0018612	SUPor-P	GGCTGCTT	TTCGGCTGCTTGTT		T	T	C	G	G	C	T	G	C	T	T	G	T	T
2R	-	2R-4125453	FBti0023300	SUPor-P	GTCCATCG	TTTGTCCATCGCAA		T	T	T	G	T	C	C	A	T	C	G	C	A	A
2R	-	2R-4332081	FBti0021962	SUPor-P	GACCTGCT	AGCGACCTGCTCAG		A	G	C	G	A	C	C	T	G	C	T	C	A	G
2R	-	2R-4488505	FBti0021755	SUPor-P	CGACAAAC	AAGCGACAAACTGC		A	A	G	C	G	A	C	A	A	A	C	T	G	C
2R	-	2R-4602590	FBti0021830	SUPor-P	TATCATAT	TCATATCATATCAA		T	C	A	T	A	T	C	A	T	A	T	C	A	A
2R	-	2R-4620934	FBti0021291	SUPor-P	GGTTGTGT	AACGGTTGTGTCTA		A	A	C	G	G	T	T	G	T	G	T	C	T	A
2R	-	2R-4778944	FBti0023193	SUPor-P	CTCTAAAT	AAGCTCTAAATGAT		A	A	G	C	T	C	T	A	A	A	T	G	A	T
2R	-	2R-4873076	FBti0025020	SUPor-P	CTCCCTCT	ATACTCCCTCTCTA		A	T	A	C	T	C	C	C	T	C	T	C	T	A
2R	-	2R-5095063	FBti0021261	SUPor-P	GGTCAGAT	ATCGGTCAGATCGA		A	T	C	G	G	T	C	A	G	A	T	C	G	A
2R	-	2R-5172554	FBti0024468	SUPor-P	ACCCAGCT	CTTACCCAGCTCCT		C	T	T	A	C	C	C	A	G	C	T	C	C	T
2R	-	2R-5174365	FBti0021832	SUPor-P	CGTACGTC	ATACGTACGTCCAG		A	T	A	C	G	T	A	C	G	T	C	C	A	G
2R	-	2R-5180166	FBti0021351	SUPor-P	GTGTGGCC	TCCGTGTGGCCGGA		T	C	C	G	T	G	T	G	G	C	C	G	G	A
2R	-	2R-5196072	FBti0023418	SUPor-P	GAAGCAAC	CTCGAAGCAACGAG		C	T	C	G	A	A	G	C	A	A	C	G	A	G
2R	-	2R-5239173	FBti0023553	SUPor-P	GTATCGTC	ATGGTATCGTCGTA		A	T	G	G	T	A	T	C	G	T	C	G	T	A
2R	-	2R-5301879	FBti0021185	SUPor-P	GGTCCGCG	GTCGGTCCGCGGAA		G	T	C	G	G	T	C	C	G	C	G	G	A	A
2R	-	2R-5329091	FBti0021860	SUPor-P	TCTTGAAG	ATTTCTTGAAGTGA		A	T	T	T	C	T	T	G	A	A	G	T	G	A
2R	-	2R-5428122	FBti0023120	SUPor-P	GGCCAGCC	AACGGCCAGCCTTA		A	A	C	G	G	C	C	A	G	C	C	T	T	A
2R	-	2R-5434506	FBti0024228	SUPor-P	ATCTAATC	ATTATCTAATCGAT		A	T	T	A	T	C	T	A	A	T	C	G	A	T
2R	-	2R-5479367	FBti0024146	SUPor-P	GACGGGCG	TTCGACGGGCGATT		T	T	C	G	A	C	G	G	G	C	G	A	T	T
2R	-	2R-5494780	FBti0018820	SUPor-P	CATATAAG	AGCCATATAAGCAT		A	G	C	C	A	T	A	T	A	A	G	C	A	T
2R	-	2R-5842896	FBti0023384	SUPor-P	AGTGCTGC	GTGAGTGCTGCTCT		G	T	G	A	G	T	G	C	T	G	C	T	C	T
2R	-	2R-5852545	FBti0021635	SUPor-P	GCTTAGTC	TAGGCTTAGTCTTA		T	A	G	G	C	T	T	A	G	T	C	T	T	A
2R	-	2R-5944324	FBti0023111	SUPor-P	AGACAGAC	AACAGACAGACAAC		A	A	C	A	G	A	C	A	G	A	C	A	A	C
2R	-	2R-6010043	FBti0023239	SUPor-P	CTCCAAGC	ATGCTCCAAGCGCC		A	T	G	C	T	C	C	A	A	G	C	G	C	C
2R	-	2R-6046130	FBti0021737	SUPor-P	GTTTAGGG	ACAGTTTAGGGGAG		A	C	A	G	T	T	T	A	G	G	G	G	A	G
2R	-	2R-6197297	FBti0024693	SUPor-P	TGTAGCCT	CATTGTAGCCTCTT		C	A	T	T	G	T	A	G	C	C	T	C	T	T
2R	-	2R-6304720	FBti0021362	SUPor-P	GATCGGGC	AGAGATCGGGCCAT		A	G	A	G	A	T	C	G	G	G	C	C	A	T
2R	-	2R-6309202	FBti0021213	SUPor-P	GGCCAACC	TTTGGCCAACCTGC		T	T	T	G	G	C	C	A	A	C	C	T	G	C
2R	-	2R-6365546	FBti0021697	SUPor-P	GTTCTGGC	ATCGTTCTGGCAGG		A	T	C	G	T	T	C	T	G	G	C	A	G	G
2R	-	2R-6446467	FBti0023107	SUPor-P	GCTTGGTC	GTCGCTTGGTCACT		G	T	C	G	C	T	T	G	G	T	C	A	C	T
2R	-	2R-6451841	FBti0024823	SUPor-P	GTTGATAG	ACGGTTGATAGGGA		A	C	G	G	T	T	G	A	T	A	G	G	G	A
2R	-	2R-6464316	FBti0023339	SUPor-P	CACTGCCC	TCACACTGCCCTAT		T	C	A	C	A	C	T	G	C	C	C	T	A	T
2R	-	2R-6560770	FBti0021864	SUPor-P	GCTTGGCG	CTTGCTTGGCGCCT		C	T	T	G	C	T	T	G	G	C	G	C	C	T
2R	-	2R-6696513	FBti0021857	SUPor-P	AGTATACC	TATAGTATACCTCA		T	A	T	A	G	T	A	T	A	C	C	T	C	A
2R	-	2R-6781659	FBti0023199	SUPor-P	CATACGAG	GCACATACGAGCAC		G	C	A	C	A	T	A	C	G	A	G	C	A	C
2R	-	2R-7059676	FBti0021165	SUPor-P	ATACAGCA	TATATACAGCAAGT		T	A	T	A	T	A	C	A	G	C	A	A	G	T
2R	-	2R-7067469	FBti0023320	SUPor-P	TTAGGGGG	AAATTAGGGGGCGT		A	A	A	T	T	A	G	G	G	G	G	C	G	T
2R	-	2R-7215648	FBti0024968	SUPor-P	GGGCAGTC	ATGGGGCAGTCGGC		A	T	G	G	G	G	C	A	G	T	C	G	G	C
2R	-	2R-7248253	FBti0023151	SUPor-P	AATTGTGC	AAAAATTGTGCAAA		A	A	A	A	A	T	T	G	T	G	C	A	A	A
2R	-	2R-7271612	FBti0023518	SUPor-P	CCGCGGGC	TCGCCGCGGGCAAT		T	C	G	C	C	G	C	G	G	G	C	A	A	T
2R	-	2R-7487588	FBti0021353	SUPor-P	GTTGCGAC	TTGGTTGCGACGAC		T	T	G	G	T	T	G	C	G	A	C	G	A	C
2R	-	2R-7502053	FBti0023443	SUPor-P	GTATCGGG	ATGGTATCGGGTGA		A	T	G	G	T	A	T	C	G	G	G	T	G	A
2R	-	2R-7553025	FBti0021152	SUPor-P	GGCCAGCT	ATTGGCCAGCTATT		A	T	T	G	G	C	C	A	G	C	T	A	T	T
2R	-	2R-7730566	FBti0024755	SUPor-P	TACTGGAA	ACGTACTGGAATAC		A	C	G	T	A	C	T	G	G	A	A	T	A	C
2R	-	2R-7773753	FBti0024534	SUPor-P	TTTCAGCC	TGTTTTCAGCCTAT		T	G	T	T	T	T	C	A	G	C	C	T	A	T
2R	-	2R-7802304	FBti0021891	SUPor-P	GGCGAAGC	AGAGGCGAAGCGAA		A	G	A	G	G	C	G	A	A	G	C	G	A	A
2R	-	2R-7817911	FBti0018777	SUPor-P	CCACGAAG	TTGCCACGAAGGAA		T	T	G	C	C	A	C	G	A	A	G	G	A	A
2R	-	2R-8026215	FBti0024247	SUPor-P	GCTCGTCC	AGAGCTCGTCCAGA		A	G	A	G	C	T	C	G	T	C	C	A	G	A
2R	-	2R-8126178	FBti0021684	SUPor-P	GTTTAGTG	TTAGTTTAGTGTAC		T	T	A	G	T	T	T	A	G	T	G	T	A	C
2R	-	2R-8148802	FBti0024572	SUPor-P	GACTTGAT	TGTGACTTGATTAT		T	G	T	G	A	C	T	T	G	A	T	T	A	T
2R	-	2R-8323313	FBti0024634	SUPor-P	GACGGAGA	GCCGACGGAGAGAA		G	C	C	G	A	C	G	G	A	G	A	G	A	A
2R	-	2R-8356194	FBti0024232	SUPor-P	GTGCAGAC	TCCGTGCAGACGAC		T	C	C	G	T	G	C	A	G	A	C	G	A	C
2R	-	2R-8361828	FBti0021464	SUPor-P	CCGTTGAC	TCTCCGTTGACCGC		T	C	T	C	C	G	T	T	G	A	C	C	G	C
2R	-	2R-8573732	FBti0018855	SUPor-P	GCGCACCA	ATCGCGCACCATAT		A	T	C	G	C	G	C	A	C	C	A	T	A	T
2R	-	2R-8630724	FBti0039097	SUPor-P	TTCTAACC	ATTTTCTAACCCTT		A	T	T	T	T	C	T	A	A	C	C	C	T	T
2R	-	2R-8643954	FBti0024828	SUPor-P	ACGTGGAG	ACCACGTGGAGCCT		A	C	C	A	C	G	T	G	G	A	G	C	C	T
2R	-	2R-8667946	FBti0023429	SUPor-P	GGTAAGAC	TCCGGTAAGACTAA		T	C	C	G	G	T	A	A	G	A	C	T	A	A
2R	-	2R-8759557	FBti0021256	SUPor-P	GGACAGGG	AAAGGACAGGGACC		A	A	A	G	G	A	C	A	G	G	G	A	C	C
2R	-	2R-8873007	FBti0018800	SUPor-P	GCCCAGAC	TAAGCCCAGACAAA		T	A	A	G	C	C	C	A	G	A	C	A	A	A
2R	-	2R-8926440	FBti0023131	SUPor-P	TCACAAAA	TCGTCACAAAACAA		T	C	G	T	C	A	C	A	A	A	A	C	A	A
2R	-	2R-9045811	FBti0021378	SUPor-P	ATTAGAAA	ACTATTAGAAACAT		A	C	T	A	T	T	A	G	A	A	A	C	A	T
2R	-	2R-9055547	FBti0021571	SUPor-P	ATCCCAAT	ATAATCCCAATTGG		A	T	A	A	T	C	C	C	A	A	T	T	G	G
2R	-	2R-9102231	FBti0023233	SUPor-P	GTTTAGAT	TTTGTTTAGATGTG		T	T	T	G	T	T	T	A	G	A	T	G	T	G
2R	-	2R-9105511	FBti0025004	SUPor-P	CTCCACAG	TTTCTCCACAGACT		T	T	T	C	T	C	C	A	C	A	G	A	C	T
2R	-	2R-9106845	FBti0021877	SUPor-P	GACTGGTC	TTCGACTGGTCGAT		T	T	C	G	A	C	T	G	G	T	C	G	A	T
2R	-	2R-9117805	FBti0021366	SUPor-P	GGTAGTAT	ATAGGTAGTATTGT		A	T	A	G	G	T	A	G	T	A	T	T	G	T
2R	-	2R-9122524	FBti0021848	SUPor-P	CTCCGCAC	TGGCTCCGCACAAT		T	G	G	C	T	C	C	G	C	A	C	A	A	T
2R	-	2R-9126952	FBti0024250	SUPor-P	GTTTCACT	GGCGTTTCACTGGT		G	G	C	G	T	T	T	C	A	C	T	G	G	T
2R	-	2R-9139228	FBti0021776	SUPor-P	ACACGGAG	AGCACACGGAGGTT		A	G	C	A	C	A	C	G	G	A	G	G	T	T
2R	-	2R-9219887	FBti0024616	SUPor-P	GTGTCCAC	GTGGTGTCCACCGA		G	T	G	G	T	G	T	C	C	A	C	C	G	A
2R	-	2R-9224990	FBti0021448	SUPor-P	GTGTTAGT	TTGGTGTTAGTGGT		T	T	G	G	T	G	T	T	A	G	T	G	G	T
2R	-	2R-9232503	FBti0021192	SUPor-P	ATATAGAG	AAGATATAGAGGAA		A	A	G	A	T	A	T	A	G	A	G	G	A	A
2R	-	2R-9250537	FBti0021924	SUPor-P	GCCGAGCG	AGAGCCGAGCGGCA		A	G	A	G	C	C	G	A	G	C	G	G	C	A
2R	-	2R-9318422	FBti0023513	SUPor-P	GGCTGAGC	AGCGGCTGAGCTGA		A	G	C	G	G	C	T	G	A	G	C	T	G	A
2R	-	2R-9325075	FBti0021752	SUPor-P	GGCTGTAG	TTCGGCTGTAGCTT		T	T	C	G	G	C	T	G	T	A	G	C	T	T
2R	-	2R-9394674	FBti0023458	SUPor-P	AGCGCGAC	TAGAGCGCGACTTT		T	A	G	A	G	C	G	C	G	A	C	T	T	T
2R	-	2R-9465143	FBti0021648	SUPor-P	AACGCGTC	TTGAACGCGTCCAA		T	T	G	A	A	C	G	C	G	T	C	C	A	A
2R	-	2R-9866115	FBti0021238	SUPor-P	GCTCAGCT	CAGGCTCAGCTTGT		C	A	G	G	C	T	C	A	G	C	T	T	G	T
2R	-	2R-9888587	FBti0021647	SUPor-P	GCTTTGCC	AGAGCTTTGCCATT		A	G	A	G	C	T	T	T	G	C	C	A	T	T
2R	-	2R-9928924	FBti0023408	SUPor-P	CACCAGTG	AACCACCAGTGTGA		A	A	C	C	A	C	C	A	G	T	G	T	G	A
2R	-	2R-10024274	FBti0021171	SUPor-P	GCACGCAC	ACAGCACGCACAAA		A	C	A	G	C	A	C	G	C	A	C	A	A	A
2R	-	2R-10062302	FBti0021337	SUPor-P	GCCCAGAG	ATTGCCCAGAGTAA		A	T	T	G	C	C	C	A	G	A	G	T	A	A
2R	-	2R-10096285	FBti0024248	SUPor-P	CACCGTAC	GTGCACCGTACTAT		G	T	G	C	A	C	C	G	T	A	C	T	A	T
2R	-	2R-10146557	FBti0021688	SUPor-P	GGTGGGAC	AAAGGTGGGACCAC		A	A	A	G	G	T	G	G	G	A	C	C	A	C
2R	-	2R-10157774	FBti0024973	SUPor-P	GACCGCAC	AGCGACCGCACTAC		A	G	C	G	A	C	C	G	C	A	C	T	A	C
2R	-	2R-10194739	FBti0021853	SUPor-P	GTTCTACG	ATTGTTCTACGCGT		A	T	T	G	T	T	C	T	A	C	G	C	G	T
2R	-	2R-10219911	FBti0021786	SUPor-P	GCTTGGCC	ATTGCTTGGCCCTT		A	T	T	G	C	T	T	G	G	C	C	C	T	T
2R	-	2R-10491680	FBti0024756	SUPor-P	AACCAGAC	ACGAACCAGACAGC		A	C	G	A	A	C	C	A	G	A	C	A	G	C
2R	-	2R-10658404	FBti0023230	SUPor-P	GACAAAGC	AATGACAAAGCGCT		A	A	T	G	A	C	A	A	A	G	C	G	C	T
2R	-	2R-10708718	FBti0025059	SUPor-P	CTTCAAGC	TTACTTCAAGCGAT		T	T	A	C	T	T	C	A	A	G	C	G	A	T
2R	-	2R-10742569	FBti0021379	SUPor-P	GCTCTGCG	CTCGCTCTGCGCCA		C	T	C	G	C	T	C	T	G	C	G	C	C	A
2R	-	2R-10815942	FBti0024980	SUPor-P	GCCCGCGC	AGAGCCCGCGCCTA		A	G	A	G	C	C	C	G	C	G	C	C	T	A
2R	-	2R-10846714	FBti0023569	SUPor-P	GCTGACAC	AGTGCTGACACAAT		A	G	T	G	C	T	G	A	C	A	C	A	A	T
2R	-	2R-11033005	FBti0021386	SUPor-P	GCCTTGGC	GTAGCCTTGGCAGA		G	T	A	G	C	C	T	T	G	G	C	A	G	A
2R	-	2R-11196558	FBti0023387	SUPor-P	GTACAACA	TTAGTACAACACAA		T	T	A	G	T	A	C	A	A	C	A	C	A	A
2R	-	2R-11210503	FBti0021731	SUPor-P	CGCGAATG	CTGCGCGAATGTTT		C	T	G	C	G	C	G	A	A	T	G	T	T	T
2R	-	2R-11487819	FBti0024773	SUPor-P	CGTACGCG	ATACGTACGCGCTA		A	T	A	C	G	T	A	C	G	C	G	C	T	A
2R	-	2R-11501262	FBti0024551	SUPor-P	ATCGCGAA	TTAATCGCGAATGT		T	T	A	A	T	C	G	C	G	A	A	T	G	T
2R	-	2R-11704504	FBti0024725	SUPor-P	ATATAGAC	AGAATATAGACCAA		A	G	A	A	T	A	T	A	G	A	C	C	A	A
2R	-	2R-11895246	FBti0021831	SUPor-P	GATCAACG	TAAGATCAACGCGC		T	A	A	G	A	T	C	A	A	C	G	C	G	C
2R	-	2R-11990236	FBti0024167	SUPor-P	GACTAGCC	AGCGACTAGCCAAA		A	G	C	G	A	C	T	A	G	C	C	A	A	A
2R	-	2R-12038451	FBti0024989	SUPor-P	ATAGAGAC	TTAATAGAGACTAT		T	T	A	A	T	A	G	A	G	A	C	T	A	T
2R	-	2R-12098134	FBti0021828	SUPor-P	GACAAGGG	GTGGACAAGGGCAT		G	T	G	G	A	C	A	A	G	G	G	C	A	T
2R	-	2R-12152116	FBti0025049	SUPor-P	GTGTGGCC	TCTGTGTGGCCCCT		T	C	T	G	T	G	T	G	G	C	C	C	C	T
2R	-	2R-12167443	FBti0024950	SUPor-P	GTTTACAG	AATGTTTACAGAAT		A	A	T	G	T	T	T	A	C	A	G	A	A	T
2R	-	2R-12176766	FBti0023096	SUPor-P	GACCAGCT	TTGGACCAGCTCAA		T	T	G	G	A	C	C	A	G	C	T	C	A	A
2R	-	2R-12223577	FBti0024600	SUPor-P	CCCCAGAC	ATACCCCAGACCAA		A	T	A	C	C	C	C	A	G	A	C	C	A	A
2R	-	2R-12499244	FBti0020909	SUPor-P	GGCTGGCC	TTTGGCTGGCCGCT		T	T	T	G	G	C	T	G	G	C	C	G	C	T
2R	-	2R-12661399	FBti0023224	SUPor-P	GCCTAAAC	AAGGCCTAAACACA		A	A	G	G	C	C	T	A	A	A	C	A	C	A
2R	-	2R-12960936	FBti0024682	SUPor-P	TCTGTTGT	GTGTCTGTTGTTTG		G	T	G	T	C	T	G	T	T	G	T	T	T	G
2R	-	2R-12975152	FBti0039090	SUPor-P	CCCGGACT	TTGCCCGGACTGTG		T	T	G	C	C	C	G	G	A	C	T	G	T	G
2R	-	2R-13134927	FBti0024174	SUPor-P	TAAAATAA	CAATAAAATAAATT		C	A	A	T	A	A	A	A	T	A	A	A	T	T
2R	-	2R-13231938	FBti0027480	SUPor-P	CTCGCGGA	TCCCTCGCGGATTT		T	C	C	C	T	C	G	C	G	G	A	T	T	T
2R	-	2R-13332116	FBti0021833	SUPor-P	ACGCACAC	CCCACGCACACAGA		C	C	C	A	C	G	C	A	C	A	C	A	G	A
2R	-	2R-13345195	FBti0023318	SUPor-P	AGTTAAGT	ATTAGTTAAGTCAT		A	T	T	A	G	T	T	A	A	G	T	C	A	T
2R	-	2R-13433955	FBti0021636	SUPor-P	CTTTCGGC	GCACTTTCGGCTCC		G	C	A	C	T	T	T	C	G	G	C	T	C	C
2R	-	2R-13520977	FBti0021164	SUPor-P	AACCGAAC	TGAAACCGAACTGA		T	G	A	A	A	C	C	G	A	A	C	T	G	A
2R	-	2R-13610866	FBti0023467	SUPor-P	GGCCCGTC	GGAGGCCCGTCTAT		G	G	A	G	G	C	C	C	G	T	C	T	A	T
2R	-	2R-14071539	FBti0024750	SUPor-P	ATTCACAG	TGGATTCACAGGCA		T	G	G	A	T	T	C	A	C	A	G	G	C	A
2R	-	2R-14192489	FBti0023420	SUPor-P	TCCAGGGG	ACTTCCAGGGGTTT		A	C	T	T	C	C	A	G	G	G	G	T	T	T
2R	-	2R-14391373	FBti0023459	SUPor-P	AAGCAAAC	ATAAAGCAAACAGA		A	T	A	A	A	G	C	A	A	A	C	A	G	A
2R	-	2R-14402117	FBti0021605	SUPor-P	GTTCGCCT	ATAGTTCGCCTTCG		A	T	A	G	T	T	C	G	C	C	T	T	C	G
2R	-	2R-14405766	FBti0023121	SUPor-P	AAGGTAGG	ATAAAGGTAGGGCA		A	T	A	A	A	G	G	T	A	G	G	G	C	A
2R	-	2R-14515456	FBti0021719	SUPor-P	TTTCCAAC	AACTTTCCAACCCT		A	A	C	T	T	T	C	C	A	A	C	C	C	T
2R	-	2R-14575687	FBti0023436	SUPor-P	CAGCAAAA	TCCCAGCAAAATCC		T	C	C	C	A	G	C	A	A	A	A	T	C	C
2R	-	2R-14722733	FBti0024603	SUPor-P	TGGTCAGT	TACTGGTCAGTCGT		T	A	C	T	G	G	T	C	A	G	T	C	G	T
2R	-	2R-14750139	FBti0024707	SUPor-P	TTACTTTC	GTATTACTTTCCTT		G	T	A	T	T	A	C	T	T	T	C	C	T	T
2R	-	2R-14765852	FBti0021550	SUPor-P	GCCGACAC	TTTGCCGACACTAT		T	T	T	G	C	C	G	A	C	A	C	T	A	T
2R	-	2R-15178273	FBti0018784	SUPor-P	GTTCAGTC	TCCGTTCAGTCTGT		T	C	C	G	T	T	C	A	G	T	C	T	G	T
2R	-	2R-15311574	FBti0023583	SUPor-P	TCACGTAC	GCGTCACGTACGCC		G	C	G	T	C	A	C	G	T	A	C	G	C	C
2R	-	2R-15434572	FBti0023422	SUPor-P	GTCGGATC	TCTGTCGGATCTTC		T	C	T	G	T	C	G	G	A	T	C	T	T	C
2R	-	2R-15556909	FBti0021694	SUPor-P	GCCCCTAT	TATGCCCCTATTTT		T	A	T	G	C	C	C	C	T	A	T	T	T	T
2R	-	2R-15614632	FBti0021527	SUPor-P	ATTCAATG	ATCATTCAATGCAT		A	T	C	A	T	T	C	A	A	T	G	C	A	T
2R	-	2R-16132864	FBti0021406	SUPor-P	ACTATGGT	TGGACTATGGTTTG		T	G	G	A	C	T	A	T	G	G	T	T	T	G
2R	-	2R-16848544	FBti0021717	SUPor-P	GGTCAGTT	GAGGGTCAGTTCGC		G	A	G	G	G	T	C	A	G	T	T	C	G	C
2R	-	2R-16948004	FBti0018783	SUPor-P	GTCCGGAT	TGCGTCCGGATCAG		T	G	C	G	T	C	C	G	G	A	T	C	A	G
2R	-	2R-16963572	FBti0021170	SUPor-P	AACTGGGG	AGAAACTGGGGGAA		A	G	A	A	A	C	T	G	G	G	G	G	A	A
2R	-	2R-17033793	FBti0021925	SUPor-P	TTTACGAT	ATTTTTACGATCCA		A	T	T	T	T	T	A	C	G	A	T	C	C	A
2R	-	2R-17070749	FBti0021217	SUPor-P	ACCCCAGC	TCGACCCCAGCCCA		T	C	G	A	C	C	C	C	A	G	C	C	C	A
2R	-	2R-17267047	FBti0021277	SUPor-P	GTGTGCGG	ATGGTGTGCGGTAA		A	T	G	G	T	G	T	G	C	G	G	T	A	A
2R	-	2R-17534090	FBti0021158	SUPor-P	AGCTGAAG	GTTAGCTGAAGTGA		G	T	T	A	G	C	T	G	A	A	G	T	G	A
2R	-	2R-17874358	FBti0024189	SUPor-P	AGCTGAAT	TTCAGCTGAATCTT		T	T	C	A	G	C	T	G	A	A	T	C	T	T
2R	-	2R-18026988	FBti0023181	SUPor-P	GATGCGAC	TTGGATGCGACCGA		T	T	G	G	A	T	G	C	G	A	C	C	G	A
2R	-	2R-18307843	FBti0024181	SUPor-P	ACCCGAAG	TTCACCCGAAGTAT		T	T	C	A	C	C	C	G	A	A	G	T	A	T
2R	-	2R-18480441	FBti0021693	SUPor-P	GGCCAGGG	TGGGGCCAGGGACA		T	G	G	G	G	C	C	A	G	G	G	A	C	A
2R	-	2R-18533841	FBti0021436	SUPor-P	GTCTGAAG	TGTGTCTGAAGTAA		T	G	T	G	T	C	T	G	A	A	G	T	A	A
2R	-	2R-18547026	FBti0024183	SUPor-P	GTGGGCTC	ATGGTGGGCTCCAA		A	T	G	G	T	G	G	G	C	T	C	C	A	A
2R	-	2R-18558579	FBti0024236	SUPor-P	ATCCAAAC	ACTATCCAAACATA		A	C	T	A	T	C	C	A	A	A	C	A	T	A
2R	-	2R-18576517	FBti0023376	SUPor-P	GCCCCCAG	TTGGCCCCCAGGAA		T	T	G	G	C	C	C	C	C	A	G	G	A	A
2R	-	2R-18686618	FBti0023506	SUPor-P	GGTCACAC	AGTGGTCACACCTA		A	G	T	G	G	T	C	A	C	A	C	C	T	A
2R	-	2R-18690661	FBti0021596	SUPor-P	GGCGAGGT	AAAGGCGAGGTCGT		A	A	A	G	G	C	G	A	G	G	T	C	G	T
2R	-	2R-18694212	FBti0024982	SUPor-P	AACGTGTG	ACAAACGTGTGCAA		A	C	A	A	A	C	G	T	G	T	G	C	A	A
2R	-	2R-18776686	FBti0021341	SUPor-P	AATCCGTA	AGAAATCCGTAGAT		A	G	A	A	A	T	C	C	G	T	A	G	A	T
2R	-	2R-18886463	FBti0024580	SUPor-P	TTTATGCC	TTGTTTATGCCTAT		T	T	G	T	T	T	A	T	G	C	C	T	A	T
2R	-	2R-18987992	FBti0025096	SUPor-P	ACTCAGGC	TTTACTCAGGCTTA		T	T	T	A	C	T	C	A	G	G	C	T	T	A
2R	-	2R-19082073	FBti0020872	SUPor-P	GTTCTACG	GGTGTTCTACGTAT		G	G	T	G	T	T	C	T	A	C	G	T	A	T
2R	-	2R-19153530	FBti0021813	SUPor-P	CTCCAGTC	TTGCTCCAGTCAAT		T	T	G	C	T	C	C	A	G	T	C	A	A	T
2R	-	2R-19410835	FBti0024587	SUPor-P	AAAAAAAT	GCTAAAAAAATAAT		G	C	T	A	A	A	A	A	A	A	T	A	A	T
2R	-	2R-19435488	FBti0024655	SUPor-P	CCTGGTGG	TTACCTGGTGGCTA		T	T	A	C	C	T	G	G	T	G	G	C	T	A
2R	-	2R-19460785	FBti0023494	SUPor-P	GCACTGAC	TCAGCACTGACCTT		T	C	A	G	C	A	C	T	G	A	C	C	T	T
2R	-	2R-19570981	FBti0023364	SUPor-P	CGCTGTAA	ACACGCTGTAACAA		A	C	A	C	G	C	T	G	T	A	A	C	A	A
2R	-	2R-19738630	FBti0023367	SUPor-P	ACCTGAAC	ACTACCTGAACACT		A	C	T	A	C	C	T	G	A	A	C	A	C	T
2R	-	2R-19794793	FBti0021394	SUPor-P	GGCCAGCC	TGCGGCCAGCCGAT		T	G	C	G	G	C	C	A	G	C	C	G	A	T
2R	-	2R-19821111	FBti0021637	SUPor-P	CATTAGAG	TGCCATTAGAGTTT		T	G	C	C	A	T	T	A	G	A	G	T	T	T
2R	-	2R-19827266	FBti0021657	SUPor-P	AATTTAAC	TACAATTTAACCAA		T	A	C	A	A	T	T	T	A	A	C	C	A	A
2R	-	2R-19859986	FBti0024681	SUPor-P	AGCGCGCC	AAAAGCGCGCCACA		A	A	A	A	G	C	G	C	G	C	C	A	C	A
2R	-	2R-19882726	FBti0018789	SUPor-P	GTACACGG	ATAGTACACGGTAT		A	T	A	G	T	A	C	A	C	G	G	T	A	T
2R	-	2R-19924145	FBti0023543	SUPor-P	GGTTGATG	AAGGGTTGATGCCT		A	A	G	G	G	T	T	G	A	T	G	C	C	T
2R	-	2R-20075158	FBti0023119	SUPor-P	CTGGAGTG	AAACTGGAGTGCTT		A	A	A	C	T	G	G	A	G	T	G	C	T	T
2R	-	2R-20413777	FBti0021294	SUPor-P	GATAGCCC	TTTGATAGCCCTCT		T	T	T	G	A	T	A	G	C	C	C	T	C	T
2R	-	2R-20418828	FBti0024542	SUPor-P	TGTTGATC	AGTTGTTGATCTGA		A	G	T	T	G	T	T	G	A	T	C	T	G	A
2R	-	2R-20487283	FBti0025097	SUPor-P	CATTAGCC	AGACATTAGCCACT		A	G	A	C	A	T	T	A	G	C	C	A	C	T
2R	-	2R-20575481	FBti0023599	SUPor-P	ATCCACAT	GGGATCCACATACC		G	G	G	A	T	C	C	A	C	A	T	A	C	C
2R	-	2R-20667429	FBti0023499	SUPor-P	TCTGCACC	TTTTCTGCACCTGA		T	T	T	T	C	T	G	C	A	C	C	T	G	A
2R	-	2R-20763749	FBti0018856	SUPor-P	TAGAGGCT	CTTTAGAGGCTGTT		C	T	T	T	A	G	A	G	G	C	T	G	T	T
2R	-	2R-20763750	FBti0021804	SUPor-P	GCGGGGCG	AAAGCGGGGCGTGT		A	A	A	G	C	G	G	G	G	C	G	T	G	T
2R	-	2R-20779102	FBti0021686	SUPor-P	GTCGCGAC	AATGTCGCGACGTA		A	A	T	G	T	C	G	C	G	A	C	G	T	A
2R	-	2R-20829883	FBti0023471	SUPor-P	GTCAGTCG	AGGGTCAGTCGTGT		A	G	G	G	T	C	A	G	T	C	G	T	G	T
2R	-	2R-20852488	FBti0021742	SUPor-P	TCTGCGCG	GGTTCTGCGCGTCA		G	G	T	T	C	T	G	C	G	C	G	T	C	A
2R	-	2R-21058879	FBti0021181	SUPor-P	CTCTGCAG	ACCCTCTGCAGGTT		A	C	C	C	T	C	T	G	C	A	G	G	T	T
2R	-	2R-21114608	FBti0024675	SUPor-P	CTGGAGCC	AGCCTGGAGCCATC		A	G	C	C	T	G	G	A	G	C	C	A	T	C
2R	-	2R-21120829	FBti0024543	SUPor-P	GCCGTCAC	TTGGCCGTCACCAA		T	T	G	G	C	C	G	T	C	A	C	C	A	A
2R	-	2R-21145171	FBti0024791	SUPor-P	GTCGTGGG	CTGGTCGTGGGTAG		C	T	G	G	T	C	G	T	G	G	G	T	A	G
3L	-	3L-104349	FBti0021194	SUPor-P	CACCCAAG	ATACACCCAAGCAG		A	T	A	C	A	C	C	C	A	A	G	C	A	G
3L	-	3L-129391	FBti0023369	SUPor-P	CGCCAGAC	TGCCGCCAGACATT		T	G	C	C	G	C	C	A	G	A	C	A	T	T
3L	-	3L-206761	FBti0021626	SUPor-P	ATTCCGCC	TTGATTCCGCCATT		T	T	G	A	T	T	C	C	G	C	C	A	T	T
3L	-	3L-212773	FBti0021346	SUPor-P	GGGAGAAC	AGAGGGAGAACCAA		A	G	A	G	G	G	A	G	A	A	C	C	A	A
3L	-	3L-257371	FBti0024443	SUPor-P	ATCGGAGC	ACAATCGGAGCACA		A	C	A	A	T	C	G	G	A	G	C	A	C	A
3L	-	3L-262962	FBti0021724	SUPor-P	GTCCACCA	TTAGTCCACCACCT		T	T	A	G	T	C	C	A	C	C	A	C	C	T
3L	-	3L-628220	FBti0018842	SUPor-P	CGTGGTAC	TTTCGTGGTACAGA		T	T	T	C	G	T	G	G	T	A	C	A	G	A
3L	-	3L-647422	FBti0021740	SUPor-P	GTAGACAA	TCAGTAGACAACAT		T	C	A	G	T	A	G	A	C	A	A	C	A	T
3L	-	3L-685943	FBti0021939	SUPor-P	CATAGTTC	GGTCATAGTTCCTG		G	G	T	C	A	T	A	G	T	T	C	C	T	G
3L	-	3L-707974	FBti0023179	SUPor-P	CTTTGAAT	CTACTTTGAATTGA		C	T	A	C	T	T	T	G	A	A	T	T	G	A
3L	-	3L-882137	FBti0021730	SUPor-P	CACCTGGC	TTGCACCTGGCGTT		T	T	G	C	A	C	C	T	G	G	C	G	T	T
3L	-	3L-1034632	FBti0024577	SUPor-P	GGCGTGTA	TCAGGCGTGTAGGT		T	C	A	G	G	C	G	T	G	T	A	G	G	T
3L	-	3L-1101000	FBti0024727	SUPor-P	CTCGAACG	TCGCTCGAACGCAA		T	C	G	C	T	C	G	A	A	C	G	C	A	A
3L	-	3L-1177291	FBti0039071	SUPor-P	GCGCAGAG	ATAGCGCAGAGATA		A	T	A	G	C	G	C	A	G	A	G	A	T	A
3L	-	3L-1496662	FBti0018821	SUPor-P	TGTTGGAC	TTCTGTTGGACTCT		T	T	C	T	G	T	T	G	G	A	C	T	C	T
3L	-	3L-1536866	FBti0024691	SUPor-P	ATGGTTTG	AATATGGTTTGGTG		A	A	T	A	T	G	G	T	T	T	G	G	T	G
3L	-	3L-1775114	FBti0021935	SUPor-P	CCCTGGCC	GAGCCCTGGCCGCT		G	A	G	C	C	C	T	G	G	C	C	G	C	T
3L	-	3L-1883042	FBti0021589	SUPor-P	GTCCTGAT	TTGGTCCTGATGTC		T	T	G	G	T	C	C	T	G	A	T	G	T	C
3L	-	3L-1969826	FBti0018674	SUPor-P	GTCCCTGA	ATTGTCCCTGACAT		A	T	T	G	T	C	C	C	T	G	A	C	A	T
3L	-	3L-2861354	FBti0021155	SUPor-P	GTTGGAAT	TGAGTTGGAATGTT		T	G	A	G	T	T	G	G	A	A	T	G	T	T
3L	-	3L-3223292	FBti0021243	SUPor-P	CTCTGGCG	AACCTCTGGCGATA		A	A	C	C	T	C	T	G	G	C	G	A	T	A
3L	-	3L-3246604	FBti0024643	SUPor-P	AAACGAAC	AAGAAACGAACCAA		A	A	G	A	A	A	C	G	A	A	C	C	A	A
3L	-	3L-3460553	FBti0024252	SUPor-P	GCCGTTGG	GTTGCCGTTGGTCA		G	T	T	G	C	C	G	T	T	G	G	T	C	A
3L	-	3L-3810138	FBti0021847	SUPor-P	ATCTGGGC	ATAATCTGGGCCAA		A	T	A	A	T	C	T	G	G	G	C	C	A	A
3L	-	3L-3832908	FBti0024513	SUPor-P	ACCAAGAC	AAGACCAAGACATA		A	A	G	A	C	C	A	A	G	A	C	A	T	A
3L	-	3L-4160980	FBti0024951	SUPor-P	GTGTGGAC	AAGGTGTGGACGTG		A	A	G	G	T	G	T	G	G	A	C	G	T	G
3L	-	3L-4542106	FBti0023164	SUPor-P	CGGCGAGG	TCTCGGCGAGGCGA		T	C	T	C	G	G	C	G	A	G	G	C	G	A
3L	-	3L-4625800	FBti0021601	SUPor-P	GCCCAGAG	AAAGCCCAGAGCTA		A	A	A	G	C	C	C	A	G	A	G	C	T	A
3L	-	3L-4698264	FBti0021300	SUPor-P	GGCACAAC	AAGGGCACAACCTT		A	A	G	G	G	C	A	C	A	A	C	C	T	T
3L	-	3L-5348491	FBti0021264	SUPor-P	GTGCGTGC	ATTGTGCGTGCTGT		A	T	T	G	T	G	C	G	T	G	C	T	G	T
3L	-	3L-5627350	FBti0025035	SUPor-P	GCGCCACG	GCAGCGCCACGTTT		G	C	A	G	C	G	C	C	A	C	G	T	T	T
3L	-	3L-5746175	FBti0023519	SUPor-P	TTTTGGCC	TTGTTTTGGCCAAC		T	T	G	T	T	T	T	G	G	C	C	A	A	C
3L	-	3L-5761933	FBti0023440	SUPor-P	GGTTGGTG	TTGGGTTGGTGGTT		T	T	G	G	G	T	T	G	G	T	G	G	T	T
3L	-	3L-6046789	FBti0018832	SUPor-P	CTACCCTG	TGGCTACCCTGGTC		T	G	G	C	T	A	C	C	C	T	G	G	T	C
3L	-	3L-6236128	FBti0024796	SUPor-P	GTCAGCAT	AAAGTCAGCATCTA		A	A	A	G	T	C	A	G	C	A	T	C	T	A
3L	-	3L-6544012	FBti0018819	SUPor-P	GGGAGGGT	ATGGGGAGGGTGCA		A	T	G	G	G	G	A	G	G	G	T	G	C	A
3L	-	3L-6740476	FBti0021911	SUPor-P	AATTGAAT	ACAAATTGAATGGT		A	C	A	A	A	T	T	G	A	A	T	G	G	T
3L	-	3L-6973135	FBti0023370	SUPor-P	CTGCAGCC	ATACTGCAGCCCCT		A	T	A	C	T	G	C	A	G	C	C	C	C	T
3L	-	3L-7118377	FBti0021166	SUPor-P	GGCGAGCG	AGGGGCGAGCGGTG		A	G	G	G	G	C	G	A	G	C	G	G	T	G
3L	-	3L-7151136	FBti0023192	SUPor-P	GGCAAAAC	ATCGGCAAAACTTT		A	T	C	G	G	C	A	A	A	A	C	T	T	T
3L	-	3L-7338356	FBti0023160	SUPor-P	CGATGGAT	AGCCGATGGATGAT		A	G	C	C	G	A	T	G	G	A	T	G	A	T
3L	-	3L-7357436	FBti0024826	SUPor-P	GTTTAGAG	TTAGTTTAGAGTTT		T	T	A	G	T	T	T	A	G	A	G	T	T	T
3L	-	3L-7363391	FBti0023328	SUPor-P	GCCAGTCC	CTCGCCAGTCCGAT		C	T	C	G	C	C	A	G	T	C	C	G	A	T
3L	-	3L-7427274	FBti0023476	SUPor-P	GACCACCC	TTTGACCACCCAGT		T	T	T	G	A	C	C	A	C	C	C	A	G	T
3L	-	3L-7428395	FBti0024180	SUPor-P	CGCTCAAA	CTTCGCTCAAATGC		C	T	T	C	G	C	T	C	A	A	A	T	G	C
3L	-	3L-7633538	FBti0024205	SUPor-P	AACTAGAC	ACAAACTAGACGAT		A	C	A	A	A	C	T	A	G	A	C	G	A	T
3L	-	3L-7810858	FBti0023228	SUPor-P	ATTCAGAG	AATATTCAGAGAGA		A	A	T	A	T	T	C	A	G	A	G	A	G	A
3L	-	3L-7858653	FBti0023231	SUPor-P	ACCCGTGC	GATACCCGTGCATT		G	A	T	A	C	C	C	G	T	G	C	A	T	T
3L	-	3L-7904707	FBti0024668	SUPor-P	GGGTGGAC	AGTGGGTGGACTGT		A	G	T	G	G	G	T	G	G	A	C	T	G	T
3L	-	3L-7929162	FBti0021484	SUPor-P	GCACTGAG	ATCGCACTGAGTGC		A	T	C	G	C	A	C	T	G	A	G	T	G	C
3L	-	3L-7938507	FBti0021501	SUPor-P	CACGCAGC	ATCCACGCAGCACT		A	T	C	C	A	C	G	C	A	G	C	A	C	T
3L	-	3L-8058161	FBti0021506	SUPor-P	ATTGCAGC	ACAATTGCAGCCAT		A	C	A	A	T	T	G	C	A	G	C	C	A	T
3L	-	3L-8180476	FBti0023117	SUPor-P	GTGCCACG	TTGGTGCCACGGGT		T	T	G	G	T	G	C	C	A	C	G	G	G	T
3L	-	3L-8406094	FBti0024199	SUPor-P	GTCTTCGG	TTGGTCTTCGGTCT		T	T	G	G	T	C	T	T	C	G	G	T	C	T
3L	-	3L-9342724	FBti0021632	SUPor-P	GCGGCGTA	CTAGCGGCGTAGTA		C	T	A	G	C	G	G	C	G	T	A	G	T	A
3L	-	3L-9360955	FBti0021193	SUPor-P	ACTAAGCG	ACAACTAAGCGTAT		A	C	A	A	C	T	A	A	G	C	G	T	A	T
3L	-	3L-9390018	FBti0024758	SUPor-P	GCTCCGCA	TTAGCTCCGCATTT		T	T	A	G	C	T	C	C	G	C	A	T	T	T
3L	-	3L-9435286	FBti0024586	SUPor-P	TATGAGGA	ATATATGAGGAGAA		A	T	A	T	A	T	G	A	G	G	A	G	A	A
3L	-	3L-9456099	FBti0018823	SUPor-P	CATCGGGG	ATGCATCGGGGACA		A	T	G	C	A	T	C	G	G	G	G	A	C	A
3L	-	3L-9540078	FBti0021753	SUPor-P	ACCCAGAC	AAGACCCAGACGAA		A	A	G	A	C	C	C	A	G	A	C	G	A	A
3L	-	3L-9961430	FBti0021377	SUPor-P	AGATGCTA	AGGAGATGCTATAC		A	G	G	A	G	A	T	G	C	T	A	T	A	C
3L	-	3L-9968287	FBti0024714	SUPor-P	TGCGAACA	AATTGCGAACAAGA		A	A	T	T	G	C	G	A	A	C	A	A	G	A
3L	-	3L-10331071	FBti0023419	SUPor-P	CGTTATGA	ATGCGTTATGACCG		A	T	G	C	G	T	T	A	T	G	A	C	C	G
3L	-	3L-10483991	FBti0021229	SUPor-P	AACATTGC	GTTAACATTGCCTA		G	T	T	A	A	C	A	T	T	G	C	C	T	A
3L	-	3L-10500646	FBti0024939	SUPor-P	TGCTCCGC	CAGTGCTCCGCCAC		C	A	G	T	G	C	T	C	C	G	C	C	A	C
3L	-	3L-10654497	FBti0021490	SUPor-P	GTCCTGGA	TTGGTCCTGGACAT		T	T	G	G	T	C	C	T	G	G	A	C	A	T
3L	-	3L-10730240	FBti0023448	SUPor-P	GACTAGAT	TCGGACTAGATTGA		T	C	G	G	A	C	T	A	G	A	T	T	G	A
3L	-	3L-10733418	FBti0025048	SUPor-P	GTTCCGAT	ACTGTTCCGATAAG		A	C	T	G	T	T	C	C	G	A	T	A	A	G
3L	-	3L-10824084	FBti0023133	SUPor-P	GTGCGGAC	ACGGTGCGGACGGT		A	C	G	G	T	G	C	G	G	A	C	G	G	T
3L	-	3L-11241028	FBti0023567	SUPor-P	ACCCGCGC	ATCACCCGCGCAGC		A	T	C	A	C	C	C	G	C	G	C	A	G	C
3L	-	3L-11527672	FBti0023485	SUPor-P	CTTCGCCA	ACGCTTCGCCATTT		A	C	G	C	T	T	C	G	C	C	A	T	T	T
3L	-	3L-11536395	FBti0025492	SUPor-P	ATTCTGCG	TTGATTCTGCGGCC		T	T	G	A	T	T	C	T	G	C	G	G	C	C
3L	-	3L-11580896	FBti0021963	SUPor-P	CCCCAAAT	ACTCCCCAAATCGG		A	C	T	C	C	C	C	A	A	A	T	C	G	G
3L	-	3L-11807918	FBti0039074	SUPor-P	GTGCGGCC	ACTGTGCGGCCTAC		A	C	T	G	T	G	C	G	G	C	C	T	A	C
3L	-	3L-11815924	FBti0025013	SUPor-P	GTGAGGGC	AATGTGAGGGCATT		A	A	T	G	T	G	A	G	G	G	C	A	T	T
3L	-	3L-12074883	FBti0023383	SUPor-P	CACTCGAC	AACCACTCGACCGA		A	A	C	C	A	C	T	C	G	A	C	C	G	A
3L	-	3L-12104259	FBti0021497	SUPor-P	CTCTCGGT	AAACTCTCGGTTTA		A	A	A	C	T	C	T	C	G	G	T	T	T	A
3L	-	3L-12508871	FBti0027606	SUPor-P	AGGCGACG	ATTAGGCGACGTAT		A	T	T	A	G	G	C	G	A	C	G	T	A	T
3L	-	3L-12526795	FBti0021500	SUPor-P	ACCCCAAC	AATACCCCAACTAT		A	A	T	A	C	C	C	C	A	A	C	T	A	T
3L	-	3L-13272911	FBti0021452	SUPor-P	GTTAGGCG	AGAGTTAGGCGGCA		A	G	A	G	T	T	A	G	G	C	G	G	C	A
3L	-	3L-13447695	FBti0023411	SUPor-P	TATCAAAA	GTATATCAAAACCG		G	T	A	T	A	T	C	A	A	A	A	C	C	G
3L	-	3L-13922505	FBti0024679	SUPor-P	CGGCTGTG	ATACGGCTGTGTGT		A	T	A	C	G	G	C	T	G	T	G	T	G	T
3L	-	3L-13986635	FBti0024184	SUPor-P	GTCTACAC	TGTGTCTACACGAA		T	G	T	G	T	C	T	A	C	A	C	G	A	A
3L	-	3L-14212823	FBti0021348	SUPor-P	TCTCCCAG	TTCTCTCCCAGCTT		T	T	C	T	C	T	C	C	C	A	G	C	T	T
3L	-	3L-14214124	FBti0024143	SUPor-P	GTGTGGTC	TCCGTGTGGTCAGT		T	C	C	G	T	G	T	G	G	T	C	A	G	T
3L	-	3L-14403508	FBti0021671	SUPor-P	GGCCAGCT	GATGGCCAGCTGTT		G	A	T	G	G	C	C	A	G	C	T	G	T	T
3L	-	3L-14420616	FBti0023551	SUPor-P	TTTATACT	TTGTTTATACTTTT		T	T	G	T	T	T	A	T	A	C	T	T	T	T
3L	-	3L-14752757	FBti0021373	SUPor-P	TGCATATG	AACTGCATATGCAT		A	A	C	T	G	C	A	T	A	T	G	C	A	T
3L	-	3L-14962328	FBti0021485	SUPor-P	GTCTGCGG	GCTGTCTGCGGTGT		G	C	T	G	T	C	T	G	C	G	G	T	G	T
3L	-	3L-15501327	FBti0018641	SUPor-P	GTTTACTG	GTCGTTTACTGTGT		G	T	C	G	T	T	T	A	C	T	G	T	G	T
3L	-	3L-15692987	FBti0024435	SUPor-P	CATGTGCC	ATGCATGTGCCCAT		A	T	G	C	A	T	G	T	G	C	C	C	A	T
3L	-	3L-15946090	FBti0023304	SUPor-P	AGCTAGCT	TAGAGCTAGCTGAT		T	A	G	A	G	C	T	A	G	C	T	G	A	T
3L	-	3L-16083470	FBti0018658	SUPor-P	GTTGGCTG	TTGGTTGGCTGTGG		T	T	G	G	T	T	G	G	C	T	G	T	G	G
3L	-	3L-16157355	FBti0039084	SUPor-P	GTGTATAC	AAAGTGTATACCGC		A	A	A	G	T	G	T	A	T	A	C	C	G	C
3L	-	3L-16404912	FBti0021590	SUPor-P	GCTTGGAC	AATGCTTGGACTTT		A	A	T	G	C	T	T	G	G	A	C	T	T	T
3L	-	3L-16487142	FBti0021425	SUPor-P	GGCGTGGG	TGGGGCGTGGGCGT		T	G	G	G	G	C	G	T	G	G	G	C	G	T
3L	-	3L-16602430	FBti0018678	SUPor-P	ACCTAACC	TGCACCTAACCTAA		T	G	C	A	C	C	T	A	A	C	C	T	A	A
3L	-	3L-16646879	FBti0021948	SUPor-P	GGTTGAAC	TCAGGTTGAACGAC		T	C	A	G	G	T	T	G	A	A	C	G	A	C
3L	-	3L-16773236	FBti0024690	SUPor-P	GCCATGAC	TTGGCCATGACCAA		T	T	G	G	C	C	A	T	G	A	C	C	A	A
3L	-	3L-16884190	FBti0023294	SUPor-P	CCTTCGTG	TCGCCTTCGTGCTT		T	C	G	C	C	T	T	C	G	T	G	C	T	T
3L	-	3L-17005624	FBti0021342	SUPor-P	CATGGGCC	TTCCATGGGCCGTT		T	T	C	C	A	T	G	G	G	C	C	G	T	T
3L	-	3L-17009737	FBti0020906	SUPor-P	AACGAGCT	CTCAACGAGCTGAT		C	T	C	A	A	C	G	A	G	C	T	G	A	T
3L	-	3L-17053825	FBti0021659	SUPor-P	GGAGCCCT	GCTGGAGCCCTTCT		G	C	T	G	G	A	G	C	C	C	T	T	C	T
3L	-	3L-17204865	FBti0039087	SUPor-P	GCCCTGCG	GTCGCCCTGCGGCT		G	T	C	G	C	C	C	T	G	C	G	G	C	T
3L	-	3L-17238943	FBti0024211	SUPor-P	ATCCAGTC	GATATCCAGTCATC		G	A	T	A	T	C	C	A	G	T	C	A	T	C
3L	-	3L-17468262	FBti0039044	SUPor-P	CGTAAGTA	ATACGTAAGTATGT		A	T	A	C	G	T	A	A	G	T	A	T	G	T
3L	-	3L-17469398	FBti0023372	SUPor-P	GGCACTGG	TTCGGCACTGGCTT		T	T	C	G	G	C	A	C	T	G	G	C	T	T
3L	-	3L-17522915	FBti0021480	SUPor-P	ATTCAGTC	TGGATTCAGTCGAT		T	G	G	A	T	T	C	A	G	T	C	G	A	T
3L	-	3L-17647355	FBti0023470	SUPor-P	CCACGATC	ACACCACGATCCAA		A	C	A	C	C	A	C	G	A	T	C	C	A	A
3L	-	3L-17834339	FBti0021629	SUPor-P	GTGTGGTT	TCGGTGTGGTTCGA		T	C	G	G	T	G	T	G	G	T	T	C	G	A
3L	-	3L-17900985	FBti0021913	SUPor-P	GGCTATGC	GCTGGCTATGCCTC		G	C	T	G	G	C	T	A	T	G	C	C	T	C
3L	-	3L-17982556	FBti0020875	SUPor-P	GTTCGAAT	TTGGTTCGAATCAA		T	T	G	G	T	T	C	G	A	A	T	C	A	A
3L	-	3L-17992661	FBti0021741	SUPor-P	CCTTGCCC	TCTCCTTGCCCGTT		T	C	T	C	C	T	T	G	C	C	C	G	T	T
3L	-	3L-17998921	FBti0023433	SUPor-P	CTGCAGCC	GCTCTGCAGCCGAA		G	C	T	C	T	G	C	A	G	C	C	G	A	A
3L	-	3L-18022850	FBti0024818	SUPor-P	AGCTGGGC	TAGAGCTGGGCTAA		T	A	G	A	G	C	T	G	G	G	C	T	A	A
3L	-	3L-18068141	FBti0023396	SUPor-P	CAATGGCC	TTGCAATGGCCATT		T	T	G	C	A	A	T	G	G	C	C	A	T	T
3L	-	3L-18098863	FBti0021819	SUPor-P	GTCCGCTG	GCTGTCCGCTGACT		G	C	T	G	T	C	C	G	C	T	G	A	C	T
3L	-	3L-18793420	FBti0024770	SUPor-P	CCTGCAGG	ATTCCTGCAGGCAT		A	T	T	C	C	T	G	C	A	G	G	C	A	T
3L	-	3L-18884168	FBti0024678	SUPor-P	GGCTGGCT	ACTGGCTGGCTAAT		A	C	T	G	G	C	T	G	G	C	T	A	A	T
3L	-	3L-19072382	FBti0024999	SUPor-P	ATTCGGAC	CTAATTCGGACTTA		C	T	A	A	T	T	C	G	G	A	C	T	T	A
3L	-	3L-19080686	FBti0021568	SUPor-P	GAGCAGTC	ATCGAGCAGTCGAT		A	T	C	G	A	G	C	A	G	T	C	G	A	T
3L	-	3L-19583786	FBti0021512	SUPor-P	GTGACACG	ATAGTGACACGCAT		A	T	A	G	T	G	A	C	A	C	G	C	A	T
3L	-	3L-19596969	FBti0018646	SUPor-P	CTGCTGCC	ATACTGCTGCCCAC		A	T	A	C	T	G	C	T	G	C	C	C	A	C
3L	-	3L-19628987	FBti0021258	SUPor-P	CGCAGTAG	AAACGCAGTAGGTG		A	A	A	C	G	C	A	G	T	A	G	G	T	G
3L	-	3L-19786644	FBti0024713	SUPor-P	GGTTGGGT	TTGGGTTGGGTTTG		T	T	G	G	G	T	T	G	G	G	T	T	T	G
3L	-	3L-19902014	FBti0024553	SUPor-P	CATCGGGC	AAACATCGGGCGAA		A	A	A	C	A	T	C	G	G	G	C	G	A	A
3L	-	3L-20178427	FBti0021614	SUPor-P	TTCCAGAC	CTCTTCCAGACAAC		C	T	C	T	T	C	C	A	G	A	C	A	A	C
3L	-	3L-20223586	FBti0020923	SUPor-P	CGTAGGCC	ACGCGTAGGCCAAA		A	C	G	C	G	T	A	G	G	C	C	A	A	A
3L	-	3L-20303835	FBti0023113	SUPor-P	GTTCAGTT	TCAGTTCAGTTCAT		T	C	A	G	T	T	C	A	G	T	T	C	A	T
3L	-	3L-20429258	FBti0024506	SUPor-P	GTCGGACG	AAAGTCGGACGTCT		A	A	A	G	T	C	G	G	A	C	G	T	C	T
3L	-	3L-20490847	FBti0039060	SUPor-P	CTTCGGAC	TGTCTTCGGACTCT		T	G	T	C	T	T	C	G	G	A	C	T	C	T
3L	-	3L-20613991	FBti0023317	SUPor-P	GCCCTAAC	AAAGCCCTAACGAT		A	A	A	G	C	C	C	T	A	A	C	G	A	T
3L	-	3L-20738255	FBti0021503	SUPor-P	AGTTGAAC	ATTAGTTGAACGTT		A	T	T	A	G	T	T	G	A	A	C	G	T	T
3L	-	3L-20738914	FBti0018679	SUPor-P	GGCGAGCA	GCGGGCGAGCAGAA		G	C	G	G	G	C	G	A	G	C	A	G	A	A
3L	-	3L-20791786	FBti0024712	SUPor-P	CTCTCGTC	TTACTCTCGTCCAT		T	T	A	C	T	C	T	C	G	T	C	C	A	T
3L	-	3L-21008037	FBti0025309	SUPor-P	CGTCAAGC	AAGCGTCAAGCTCT		A	A	G	C	G	T	C	A	A	G	C	T	C	T
3L	-	3L-21040688	FBti0024214	SUPor-P	GTCTGAAC	TCCGTCTGAACGAT		T	C	C	G	T	C	T	G	A	A	C	G	A	T
3L	-	3L-21274605	FBti0018854	SUPor-P	GTTCAGCT	ATCGTTCAGCTTGT		A	T	C	G	T	T	C	A	G	C	T	T	G	T
3L	-	3L-21279143	FBti0021884	SUPor-P	ACTTGGCC	TTCACTTGGCCTTT		T	T	C	A	C	T	T	G	G	C	C	T	T	T
3L	-	3L-21815782	FBti0021180	SUPor-P	GGCCAGCG	AAAGGCCAGCGAAT		A	A	A	G	G	C	C	A	G	C	G	A	A	T
3L	-	3L-22710887	FBti0023240	SUPor-P	GTTGGGCA	GTAGTTGGGCAGTT		G	T	A	G	T	T	G	G	G	C	A	G	T	T
3L	-	3L-22721159	FBti0024638	SUPor-P	CTCATAAG	TCGCTCATAAGGAA		T	C	G	C	T	C	A	T	A	A	G	G	A	A
3L	-	3L-22721251	FBti0024185	SUPor-P	CTTTGGAC	TCGCTTTGGACTCT		T	C	G	C	T	T	T	G	G	A	C	T	C	T
3L	-	3L-22857927	FBti0018682	SUPor-P	GCCAGCCC	ATGGCCAGCCCGCT		A	T	G	G	C	C	A	G	C	C	C	G	C	T
3L	-	3L-22871902	FBti0023534	SUPor-P	GTTTAGAT	AAAGTTTAGATGAT		A	A	A	G	T	T	T	A	G	A	T	G	A	T
3L	-	3L-22941647	FBti0021733	SUPor-P	CCCTGGCA	ATACCCTGGCACAC		A	T	A	C	C	C	T	G	G	C	A	C	A	C
3L	-	3L-22960772	FBti0023456	SUPor-P	GGCAGAGG	ATCGGCAGAGGCAG		A	T	C	G	G	C	A	G	A	G	G	C	A	G
3L	-	3L-23022021	FBti0018788	SUPor-P	GTTCTGCG	ATCGTTCTGCGTCT		A	T	C	G	T	T	C	T	G	C	G	T	C	T
3L	-	3L-23058487	FBti0039030	SUPor-P	GGCCAGAC	TGGGGCCAGACCCG		T	G	G	G	G	C	C	A	G	A	C	C	C	G
3L	-	3L-23334673	FBti0023525	SUPor-P	GTTTGGGG	TTCGTTTGGGGCCA		T	T	C	G	T	T	T	G	G	G	G	C	C	A
3R	-	3R-55069	FBti0021223	SUPor-P	CTTTGAAC	ACGCTTTGAACTTA		A	C	G	C	T	T	T	G	A	A	C	T	T	A
3R	-	3R-107326	FBti0024482	SUPor-P	GGCAAGAT	AATGGCAAGATAAA		A	A	T	G	G	C	A	A	G	A	T	A	A	A
3R	-	3R-147614	FBti0023531	SUPor-P	GTCCAACT	AAAGTCCAACTGAT		A	A	A	G	T	C	C	A	A	C	T	G	A	T
3R	-	3R-263079	FBti0023392	SUPor-P	CGCCAAGT	TTGCGCCAAGTTTT		T	T	G	C	G	C	C	A	A	G	T	T	T	T
3R	-	3R-278325	FBti0023399	SUPor-P	GTCTGACC	AATGTCTGACCACA		A	A	T	G	T	C	T	G	A	C	C	A	C	A
3R	-	3R-365775	FBti0021559	SUPor-P	GTTATCAC	TTGGTTATCACCCA		T	T	G	G	T	T	A	T	C	A	C	C	C	A
3R	-	3R-637884	FBti0024609	SUPor-P	AGGAGCGT	AAAAGGAGCGTGCA		A	A	A	A	G	G	A	G	C	G	T	G	C	A
3R	-	3R-638831	FBti0023168	SUPor-P	ACAACAAC	CGGACAACAACAAA		C	G	G	A	C	A	A	C	A	A	C	A	A	A
3R	-	3R-773907	FBti0023481	SUPor-P	TGGTTGGC	TTTTGGTTGGCGCG		T	T	T	T	G	G	T	T	G	G	C	G	C	G
3R	-	3R-1058272	FBti0021619	SUPor-P	ACCAGGCG	AACACCAGGCGTAT		A	A	C	A	C	C	A	G	G	C	G	T	A	T
3R	-	3R-1066442	FBti0018828	SUPor-P	GTCTGGGC	GCTGTCTGGGCGGC		G	C	T	G	T	C	T	G	G	G	C	G	G	C
3R	-	3R-1082380	FBti0021602	SUPor-P	CCCTCGCC	TTCCCCTCGCCCAA		T	T	C	C	C	C	T	C	G	C	C	C	A	A
3R	-	3R-1123267	FBti0021727	SUPor-P	CCTTGTAC	AACCCTTGTACTCA		A	A	C	C	C	T	T	G	T	A	C	T	C	A
3R	-	3R-1328609	FBti0023472	SUPor-P	GGCTGAAC	CAGGGCTGAACTAA		C	A	G	G	G	C	T	G	A	A	C	T	A	A
3R	-	3R-1584668	FBti0018635	SUPor-P	AACAGTGT	AACAACAGTGTCGA		A	A	C	A	A	C	A	G	T	G	T	C	G	A
3R	-	3R-1786001	FBti0024561	SUPor-P	GGCGGGTC	AGTGGCGGGTCCCA		A	G	T	G	G	C	G	G	G	T	C	C	C	A
3R	-	3R-2064913	FBti0021862	SUPor-P	ATATGTCT	GCGATATGTCTTTC		G	C	G	A	T	A	T	G	T	C	T	T	T	C
3R	-	3R-2916208	FBti0021958	SUPor-P	AGCAACAG	AGTAGCAACAGCAA		A	G	T	A	G	C	A	A	C	A	G	C	A	A
3R	-	3R-2948638	FBti0021668	SUPor-P	CTCGAGAT	ATACTCGAGATATT		A	T	A	C	T	C	G	A	G	A	T	A	T	T
3R	-	3R-2970480	FBti0024763	SUPor-P	ACTTGAAC	GGCACTTGAACCTA		G	G	C	A	C	T	T	G	A	A	C	C	T	A
3R	-	3R-3013253	FBti0023581	SUPor-P	TGCCAAGG	TGATGCCAAGGGTA		T	G	A	T	G	C	C	A	A	G	G	G	T	A
3R	-	3R-3075471	FBti0024752	SUPor-P	GCTTGGAG	TGAGCTTGGAGCTT		T	G	A	G	C	T	T	G	G	A	G	C	T	T
3R	-	3R-3190409	FBti0025110	SUPor-P	AAAGTAAG	GCAAAAGTAAGTGA		G	C	A	A	A	A	G	T	A	A	G	T	G	A
3R	-	3R-3300386	FBti0018626	SUPor-P	ATCCAAGC	TGCATCCAAGCCGG		T	G	C	A	T	C	C	A	A	G	C	C	G	G
3R	-	3R-3317351	FBti0021714	SUPor-P	AGCTGGAT	CATAGCTGGATTTT		C	A	T	A	G	C	T	G	G	A	T	T	T	T
3R	-	3R-3619770	FBti0018813	SUPor-P	ACACAGAC	GACACACAGACACA		G	A	C	A	C	A	C	A	G	A	C	A	C	A
3R	-	3R-3645219	FBti0021472	SUPor-P	CTACGTGC	ACACTACGTGCGCG		A	C	A	C	T	A	C	G	T	G	C	G	C	G
3R	-	3R-3745618	FBti0023544	SUPor-P	GCTTAACC	ATGGCTTAACCCTT		A	T	G	G	C	T	T	A	A	C	C	C	T	T
3R	-	3R-3800027	FBti0023373	SUPor-P	TTCGTGGC	TACTTCGTGGCGCT		T	A	C	T	T	C	G	T	G	G	C	G	C	T
3R	-	3R-4142563	FBti0025057	SUPor-P	GGATAGTT	AAAGGATAGTTGGT		A	A	A	G	G	A	T	A	G	T	T	G	G	T
3R	-	3R-4302819	FBti0021511	SUPor-P	CTTCGGCT	ACGCTTCGGCTAAA		A	C	G	C	T	T	C	G	G	C	T	A	A	A
3R	-	3R-4627386	FBti0021494	SUPor-P	ACTCATCC	AGTACTCATCCATA		A	G	T	A	C	T	C	A	T	C	C	A	T	A
3R	-	3R-4631302	FBti0025031	SUPor-P	CGCTGTCC	TGCCGCTGTCCAGT		T	G	C	C	G	C	T	G	T	C	C	A	G	T
3R	-	3R-4636289	FBti0025070	SUPor-P	CCGCAGAC	AAGCCGCAGACTAC		A	A	G	C	C	G	C	A	G	A	C	T	A	C
3R	-	3R-4637538	FBti0021515	SUPor-P	TTCCAATC	CAATTCCAATCCCA		C	A	A	T	T	C	C	A	A	T	C	C	C	A
3R	-	3R-4646422	FBti0024728	SUPor-P	ATTCACTC	ATGATTCACTCTGA		A	T	G	A	T	T	C	A	C	T	C	T	G	A
3R	-	3R-4672083	FBti0023379	SUPor-P	ACCGTTGT	TTCACCGTTGTTCT		T	T	C	A	C	C	G	T	T	G	T	T	C	T
3R	-	3R-4686995	FBti0023354	SUPor-P	GCAGTGCT	TCTGCAGTGCTTCA		T	C	T	G	C	A	G	T	G	C	T	T	C	A
3R	-	3R-4753817	FBti0021437	SUPor-P	GGGCAGCT	GTTGGGCAGCTGAA		G	T	T	G	G	G	C	A	G	C	T	G	A	A
3R	-	3R-4859846	FBti0023530	SUPor-P	AATCAGCC	GTGAATCAGCCTTT		G	T	G	A	A	T	C	A	G	C	C	T	T	T
3R	-	3R-5178872	FBti0023138	SUPor-P	GTCATGCT	ACGGTCATGCTGCA		A	C	G	G	T	C	A	T	G	C	T	G	C	A
3R	-	3R-5282784	FBti0018816	SUPor-P	GTTTTTGG	TTGGTTTTTGGGGC		T	T	G	G	T	T	T	T	T	G	G	G	G	C
3R	-	3R-5377202	FBti0021798	SUPor-P	GTCCGAGG	TTGGTCCGAGGACT		T	T	G	G	T	C	C	G	A	G	G	A	C	T
3R	-	3R-5457403	FBti0023319	SUPor-P	GAACGACG	ATTGAACGACGCGA		A	T	T	G	A	A	C	G	A	C	G	C	G	A
3R	-	3R-5484710	FBti0021712	SUPor-P	CGCCTGCG	AACCGCCTGCGTTT		A	A	C	C	G	C	C	T	G	C	G	T	T	T
3R	-	3R-5530401	FBti0018680	SUPor-P	ATGTGGCT	AACATGTGGCTCTT		A	A	C	A	T	G	T	G	G	C	T	C	T	T
3R	-	3R-5571387	FBti0021241	SUPor-P	TCCCAGCC	TGCTCCCAGCCAGT		T	G	C	T	C	C	C	A	G	C	C	A	G	T
3R	-	3R-5837137	FBti0020922	SUPor-P	CTTCAACT	AAACTTCAACTGAA		A	A	A	C	T	T	C	A	A	C	T	G	A	A
3R	-	3R-5868294	FBti0023561	SUPor-P	ACGCTAGG	AAGACGCTAGGGAT		A	A	G	A	C	G	C	T	A	G	G	G	A	T
3R	-	3R-6576803	FBti0024674	SUPor-P	GTCCAACC	GTTGTCCAACCAAA		G	T	T	G	T	C	C	A	A	C	C	A	A	A
3R	-	3R-6613893	FBti0025042	SUPor-P	GTCTCGCC	TGTGTCTCGCCCCT		T	G	T	G	T	C	T	C	G	C	C	C	C	T
3R	-	3R-6641028	FBti0021825	SUPor-P	CGCGGAAC	AAACGCGGAACGCT		A	A	A	C	G	C	G	G	A	A	C	G	C	T
3R	-	3R-7047991	FBti0023461	SUPor-P	GTTCAGCT	TCTGTTCAGCTCAG		T	C	T	G	T	T	C	A	G	C	T	C	A	G
3R	-	3R-7178919	FBti0023539	SUPor-P	TTTGGGCG	TAGTTTGGGCGGCA		T	A	G	T	T	T	G	G	G	C	G	G	C	A
3R	-	3R-7392481	FBti0024569	SUPor-P	GGCCCACG	AAGGGCCCACGTCT		A	A	G	G	G	C	C	C	A	C	G	T	C	T
3R	-	3R-7394965	FBti0021617	SUPor-P	CCCAGGCC	GGCCCCAGGCCCAC		G	G	C	C	C	C	A	G	G	C	C	C	A	C
3R	-	3R-7430616	FBti0020877	SUPor-P	TGTCGCAT	ACCTGTCGCATCAA		A	C	C	T	G	T	C	G	C	A	T	C	A	A
3R	-	3R-7586906	FBti0021481	SUPor-P	CTCCGAGC	TTTCTCCGAGCGCT		T	T	T	C	T	C	C	G	A	G	C	G	C	T
3R	-	3R-7599681	FBti0021417	SUPor-P	CCATGGAA	AGCCCATGGAACGT		A	G	C	C	C	A	T	G	G	A	A	C	G	T
3R	-	3R-7831229	FBti0024568	SUPor-P	ACAACACG	ATAACAACACGGAA		A	T	A	A	C	A	A	C	A	C	G	G	A	A
3R	-	3R-8447672	FBti0025082	SUPor-P	TCACAGAG	TTATCACAGAGAGC		T	T	A	T	C	A	C	A	G	A	G	A	G	C
3R	-	3R-8806501	FBti0018853	SUPor-P	GGTGGGCG	TCGGGTGGGCGTAA		T	C	G	G	G	T	G	G	G	C	G	T	A	A
3R	-	3R-8838061	FBti0020911	SUPor-P	GTTCGGCG	TGAGTTCGGCGTGT		T	G	A	G	T	T	C	G	G	C	G	T	G	T
3R	-	3R-9097708	FBti0023601	SUPor-P	TCGCGGAC	TCTTCGCGGACCCA		T	C	T	T	C	G	C	G	G	A	C	C	C	A
3R	-	3R-9130705	FBti0021816	SUPor-P	CTCGGGAC	ATTCTCGGGACCAA		A	T	T	C	T	C	G	G	G	A	C	C	A	A
3R	-	3R-9200799	FBti0021797	SUPor-P	ATGCAAGC	AATATGCAAGCCAC		A	A	T	A	T	G	C	A	A	G	C	C	A	C
3R	-	3R-9205609	FBti0018657	SUPor-P	GGGCATTC	ATAGGGCATTCCTG		A	T	A	G	G	G	C	A	T	T	C	C	T	G
3R	-	3R-9486227	FBti0024460	SUPor-P	TTTGGGTC	TTGTTTGGGTCCTA		T	T	G	T	T	T	G	G	G	T	C	C	T	A
3R	-	3R-9508909	FBti0024449	SUPor-P	CCGAGGAC	ATACCGAGGACTAG		A	T	A	C	C	G	A	G	G	A	C	T	A	G
3R	-	3R-9608008	FBti0021917	SUPor-P	GTCGTAAG	ATTGTCGTAAGCCG		A	T	T	G	T	C	G	T	A	A	G	C	C	G
3R	-	3R-9923812	FBti0072057	SUPor-P	GTCACAAC	AAGGTCACAACGAC		A	A	G	G	T	C	A	C	A	A	C	G	A	C
3R	-	3R-10390709	FBti0023480	SUPor-P	GCCCCGCT	TTGGCCCCGCTCTT		T	T	G	G	C	C	C	C	G	C	T	C	T	T
3R	-	3R-11246215	FBti0023478	SUPor-P	GCTACGCT	TTCGCTACGCTGTT		T	T	C	G	C	T	A	C	G	C	T	G	T	T
3R	-	3R-11727123	FBti0023576	SUPor-P	AGTCAGTC	TCGAGTCAGTCGCT		T	C	G	A	G	T	C	A	G	T	C	G	C	T
3R	-	3R-11799018	FBti0024618	SUPor-P	ACTCCGAG	AGTACTCCGAGTTT		A	G	T	A	C	T	C	C	G	A	G	T	T	T
3R	-	3R-12054756	FBti0023432	SUPor-P	GCCGTCGC	AACGCCGTCGCTTT		A	A	C	G	C	C	G	T	C	G	C	T	T	T
3R	-	3R-12061455	FBti0021280	SUPor-P	TTACCACC	TACTTACCACCAAT		T	A	C	T	T	A	C	C	A	C	C	A	A	T
3R	-	3R-12106738	FBti0021289	SUPor-P	CTCTGTGG	GCACTCTGTGGGCA		G	C	A	C	T	C	T	G	T	G	G	G	C	A
3R	-	3R-12167740	FBti0024798	SUPor-P	GCGTGCTT	TCAGCGTGCTTTTT		T	C	A	G	C	G	T	G	C	T	T	T	T	T
3R	-	3R-12175067	FBti0024249	SUPor-P	GTAGCTCA	TTTGTAGCTCACAA		T	T	T	G	T	A	G	C	T	C	A	C	A	A
3R	-	3R-12275303	FBti0021616	SUPor-P	GATTGGCT	TAAGATTGGCTCAA		T	A	A	G	A	T	T	G	G	C	T	C	A	A
3R	-	3R-12450987	FBti0039063	SUPor-P	GCTTAGAG	TTGGCTTAGAGCAA		T	T	G	G	C	T	T	A	G	A	G	C	A	A
3R	-	3R-12821805	FBti0025108	SUPor-P	CGTTGTTG	AGCCGTTGTTGTTT		A	G	C	C	G	T	T	G	T	T	G	T	T	T
3R	-	3R-13544037	FBti0018661	SUPor-P	CTAGAGCT	TTACTAGAGCTTTT		T	T	A	C	T	A	G	A	G	C	T	T	T	T
3R	-	3R-14024333	FBti0018844	SUPor-P	GTCTCCAT	TCGGTCTCCATTAT		T	C	G	G	T	C	T	C	C	A	T	T	A	T
3R	-	3R-14124575	FBti0023587	SUPor-P	ATTTGGAC	TCGATTTGGACTGA		T	C	G	A	T	T	T	G	G	A	C	T	G	A
3R	-	3R-14273264	FBti0021563	SUPor-P	GGCGGGCT	TTTGGCGGGCTCTC		T	T	T	G	G	C	G	G	G	C	T	C	T	C
3R	-	3R-14398985	FBti0023401	SUPor-P	GCTTGGAC	CCAGCTTGGACCAT		C	C	A	G	C	T	T	G	G	A	C	C	A	T
3R	-	3R-14742307	FBti0021843	SUPor-P	GTTACGTC	GACGTTACGTCCAT		G	A	C	G	T	T	A	C	G	T	C	C	A	T
3R	-	3R-14854669	FBti0018836	SUPor-P	CCGCAATG	ATACCGCAATGCCC		A	T	A	C	C	G	C	A	A	T	G	C	C	C
3R	-	3R-15006375	FBti0021677	SUPor-P	TTTTGCAC	GTGTTTTGCACGAA		G	T	G	T	T	T	T	G	C	A	C	G	A	A
3R	-	3R-15476193	FBti0023208	SUPor-P	GCACAGAC	TGGGCACAGACGAA		T	G	G	G	C	A	C	A	G	A	C	G	A	A
3R	-	3R-15592147	FBti0027574	SUPor-P	ACCGAACC	TAAACCGAACCCGA		T	A	A	A	C	C	G	A	A	C	C	C	G	A
3R	-	3R-15628265	FBti0020879	SUPor-P	GGGTACTC	CAAGGGTACTCGAC		C	A	A	G	G	G	T	A	C	T	C	G	A	C
3R	-	3R-16078515	FBti0024582	SUPor-P	GGGGAAGG	TTAGGGGAAGGAGT		T	T	A	G	G	G	G	A	A	G	G	A	G	T
3R	-	3R-16604562	FBti0024239	SUPor-P	GTTGAAAC	GTAGTTGAAACCTA		G	T	A	G	T	T	G	A	A	A	C	C	T	A
3R	-	3R-16608675	FBti0024450	SUPor-P	CTCTGGAG	TTACTCTGGAGCAT		T	T	A	C	T	C	T	G	G	A	G	C	A	T
3R	-	3R-16656270	FBti0018640	SUPor-P	GACTATCC	ACTGACTATCCAAA		A	C	T	G	A	C	T	A	T	C	C	A	A	A
3R	-	3R-16740354	FBti0018850	SUPor-P	GCTGTGGT	AAAGCTGTGGTGTT		A	A	A	G	C	T	G	T	G	G	T	G	T	T
3R	-	3R-16886060	FBti0024466	SUPor-P	AATTTCTG	GGGAATTTCTGAAG		G	G	G	A	A	T	T	T	C	T	G	A	A	G
3R	-	3R-16964449	FBti0021508	SUPor-P	GTTTGGGG	ATTGTTTGGGGGAG		A	T	T	G	T	T	T	G	G	G	G	G	A	G
3R	-	3R-17014571	FBti0020916	SUPor-P	GTTTTGGG	TTTGTTTTGGGAAT		T	T	T	G	T	T	T	T	G	G	G	A	A	T
3R	-	3R-17024809	FBti0027550	SUPor-P	GTGCGGCC	TATGTGCGGCCCAT		T	A	T	G	T	G	C	G	G	C	C	C	A	T
3R	-	3R-17050201	FBti0025029	SUPor-P	GGTCGTTC	TTCGGTCGTTCCGT		T	T	C	G	G	T	C	G	T	T	C	C	G	T
3R	-	3R-17095350	FBti0021526	SUPor-P	GTTCAGCC	CTTGTTCAGCCTTT		C	T	T	G	T	T	C	A	G	C	C	T	T	T
3R	-	3R-17122206	FBti0018654	SUPor-P	CTCCACAC	GGGCTCCACACTAT		G	G	G	C	T	C	C	A	C	A	C	T	A	T
[truncated: 237 more rows]

## Sheet: SUPor-P +
Chromosome	P direction	InsertionSite	PelementFlybaseId	PelementTypes	8 bp repeat	14 bp ins. site		1	2	3	4	5	6	7	8	9	10	11	12	13	14
[truncated: 1,012 more rows]

[truncated: 5 more sheets: XP -, XP +, GawB +, InSite, StanEx]
